# Supplementary material for: Ruthenium(ii)-catalyzed C–H alkenylation/annulation cascade for the rapid synthesis of benzoimidazoisoindoles
Source: Royal Society of Chemistry journal article supplement (doi:10.1039/c7qo00136c), 2017-01-01
Supplement: c7qo00136c1.pdf [file c7qo00136c1.pdf]

## Supporting Information

### Ruthenium (II)-Catalyzed C-H Alkenylation/Annulation Cascade for the Rapid Synthesis of Benzoimidazoisindoles

Manikandan Selvaraju,<sup>a</sup> Ying-Lien Wang<sup>a</sup> and Chung-Ming Sun<sup>\*a,b</sup>

<sup>a</sup> Department of Applied Chemistry, 1001 Ta-Hseuh Road, National Chiao Tung University, Hsinchu 300-10, Taiwan, ROC

<sup>b</sup> Department of Medicinal and Applied Chemistry, Kaohsiung Medical University, 100, Shih-Chuan 1<sup>st</sup> Road, Kaohsiung 807-08, Taiwan, ROC

Email: [cmsun@mail.nctu.edu.tw](mailto:cmsun@mail.nctu.edu.tw)

#### Table of contents

|                                                                                       |      |
|---------------------------------------------------------------------------------------|------|
| General remarks                                                                       | S2   |
| Spectral data of compounds <b>3</b>                                                   | S2   |
| Spectra ( <sup>1</sup> H NMR, <sup>13</sup> C, LR-MS, HRMS, IR) of compounds <b>3</b> | S9   |
| X-ray crystallography data of compound <b>3b</b>                                      | S126 |

## General Remarks

Solvents were distilled before use. All the reactions were performed under open air atmosphere with unpurified reagents and dry solvents. Analytical thin-layer chromatography (TLC) was performed using 0.25 mm silica gelcoated Kieselgel 60 F254 plates. Flash chromatography was performed using the indicated solvent and silica gel 60 (Merck, 230-400 mesh). <sup>1</sup>H NMR (300 & 400 MHz) and <sup>13</sup>C NMR (75 & 100 MHz) spectra were recorded on a Bruker DX-300 spectrometer. Chemical shifts are reported in parts per million (ppm) on the δ scale from an internal standard. High-resolution mass spectra (HRMS) were recorded on a JEOL TMS-HX 110 mass spectrometer.

## Spectral data of compounds 3:

### Methyl 2-(3-methyl-11*H*-benzo[4,5]imidazo[2,1-*a*]isoindol-11-yl) acetate (3b)

Yellow solid, yield = 78 %; mp = 122-124 °C; <sup>1</sup>H NMR (400 MHz, CDCl<sub>3</sub>) δ 7.87 – 7.80 (m, 2H), 7.46-7.39 (m, 2H), 7.30-7.25 (m, 5H), 5.69 (t, *J* = 6.5 Hz, 1H), 3.80 (s, 3H), 3.14 (dd, *J* = 16.4, 4.0 Hz, 1H), 2.85 (dd, *J* = 16.4, 4.0 Hz, 1H), 2.48 (s, 3H); <sup>13</sup>C NMR (100 MHz, CDCl<sub>3</sub>) δ 171.1, 148.8, 144.7, 139.6, 132.2, 130.9, 128.9, 123.4, 122.9, 122.7, 122.4, 120.8, 109.9, 55.9, 52.5, 39.0, 21.6; LRMS (ESI<sup>+</sup>) *m/z* : 293.2 (M+H)<sup>+</sup>; HRMS: calcd for C<sub>18</sub>H<sub>17</sub>N<sub>2</sub>O<sub>2</sub> (M+H)<sup>+</sup> *m/z*: 293.1285; Found 293.1288; IR (cm<sup>-1</sup>, neat): 3143, 2787, 1975, 1658, 1570, 1517, 1473, 1394.

### Methyl 2-(2-methyl-11*H*-benzo[4,5]imidazo[2,1-*a*]isoindol-11-yl) acetate (3c)

White solid, yield = 93 %; mp = 103-105 °C; <sup>1</sup>H NMR (400 MHz, CDCl<sub>3</sub>) δ 7.89 (d, *J* = 7.6 Hz, 1H), 7.81-7.76 (m, 1H), 7.40-7.35 (m, 1H), 7.33-7.28 (m, 2H), 7.26-7.20 (m, 3H), 5.66 (t, *J* = 7.6 Hz, 1H), 3.78 (d, *J* = 1.2 Hz, 3H), 3.10 (dd, *J* = 16.6, 8.0 Hz, 1H), 2.85 (dd, *J* = 16.6, 8.0 Hz, 1H), 2.43 (s, 3H); <sup>13</sup>C NMR (100 MHz, CDCl<sub>3</sub>) δ 170.9, 157.6, 148.7, 147.6, 140.5, 132.0, 130.1, 126.0, 124.1, 122.6, 122.1, 121.8, 120.5, 109.6, 55.8, 52.4, 38.8, 21.9; LRMS (ESI<sup>+</sup>) *m/z*: 293.2 (M+H)<sup>+</sup>; HRMS: calcd for C<sub>18</sub>H<sub>17</sub>N<sub>2</sub>O<sub>2</sub> (M+H)<sup>+</sup> *m/z*: 293.1285; Found 293.1295; IR (cm<sup>-1</sup>, neat) : 3136, 2785, 1967, 1826, 1583, 1508, 1400.

### Methyl 2-(2-chloro-11*H*-benzo[4,5]imidazo[2,1-*a*]isoindol-11-yl) acetate (3d)

Brown solid, yield = 71 %; mp = 133-135 °C; <sup>1</sup>H NMR (400 MHz, CDCl<sub>3</sub>) δ 7.96 (d, *J* = 8.1 Hz, 1H), 7.85-7.81 (m, 1H), 7.59-7.57 (m, 1H), 7.51 (dd, *J* = 8.1, 1.9 Hz, 1H), 7.44-7.41 (m, 1H),

7.30- 7.27 (m, 2H), 5.72 (t,  $J = 6.4$  Hz, 1H), 3.82 (s, 3H), 3.22 (dd,  $J = 16.4$ , 8 Hz, 1H), 2.88 (dd,  $J = 16.4$ , 8.0 Hz, 1H);  $^{13}\text{C}$  NMR (101 MHz,  $\text{CDCl}_3$ )  $\delta$  170.6, 156.3, 148.8, 148.6, 135.9, 129.8, 127.3, 124.3, 123.2, 123.0, 122.6, 120.8, 109.7, 55.7, 52.5, 38.4, 29.7; LRMS ( $\text{ESI}^+$ )  $m/z$ : 313.2 ( $\text{M}+\text{H}$ ) $^+$ ; HRMS: calcd for  $\text{C}_{17}\text{H}_{14}\text{ClN}_2\text{O}_2$  ( $\text{M}+\text{H}$ ) $^+$   $m/z$ : 313.0738; Found 313.0741; IR ( $\text{cm}^{-1}$ , neat) : 3143, 2761, 1990, 1652, 1566, 1506.

**Methyl 2-(2-(trifluoromethyl)-11H-benzo[4,5]imidazo[2,1-a]isoindol- 11-yl)acetate (3e)**

White solid, yield = 81 %; mp = 191-194 °C;  $^1\text{H}$  NMR (400 MHz,  $\text{CDCl}_3$ )  $\delta$  8.15 (d,  $J = 7.9$  Hz, 1H), 7.91-7.77 (m, 3H), 7.47 (dt,  $J = 6.2$ , 2.8 Hz, 1H), 7.32 (dt,  $J = 5.9$ , 2.8 Hz, 2H), 5.80 (t,  $J = 6.2$  Hz, 1H), 3.82 (s, 3H), 3.24 (dd,  $J = 16.9$ , 5.8 Hz, 1H), 2.92 (dd,  $J = 16.9$ , 7.2 Hz, 1H);  $^{13}\text{C}$  NMR (100 MHz,  $\text{CDCl}_3$ )  $\delta$  170.5, 155.8, 148.7, 147.6, 132.2, 131.9, 131.7 (q,  $J_{\text{C-F}} = 32.8$  Hz), 126.8 (q,  $J_{\text{C-F}} = 3.7$  Hz), 123.8 (q,  $J_{\text{C-F}} = 272.7$  Hz), 123.6, 122.9, 122.3, 121.2, 120.9, 110.0, 56.0, 52.6, 38.4; LRMS ( $\text{ESI}^+$ )  $m/z$ : 347.2 ( $\text{M}+\text{H}$ ) $^+$ ; HRMS: calcd for  $\text{C}_{18}\text{H}_{14}\text{F}_3\text{N}_2\text{O}_2$  ( $\text{M}+\text{H}$ ) $^+$   $m/z$ : 347.1002; Found 347.1012; IR ( $\text{cm}^{-1}$ , neat) : 3126, 3030, 2738, 1990, 1967, 1826, 1598, 1494, 1407.

**Methyl 2-(2-methoxy-11H-benzo[4,5]imidazo[2,1-a]isoindol-11-yl) acetate (3f)**

Yellow solid, Yield = 66 %; mp = 139-141 °C;  $^1\text{H}$  NMR (400 MHz,  $\text{CDCl}_3$ )  $\delta$  7.94 (d,  $J = 8.4$  Hz, 1H), 7.81-7.76 (m, 1H), 7.41-7.36 (m, 1H), 7.27-7.21 (m, 3H), 7.08 (m, 1H), 7.04 (dd,  $J = 8.4$ , 2.3 Hz, 1H), 5.67 (t,  $J = 6.4$ , 1H), 3.88 (s, 3H), 3.80 (s, 3H), 3.16 (dd,  $J = 16.7$ , 6.3 Hz, 1H), 2.86 (dd,  $J = 16.7$ , 6.4 Hz, 1H);  $^{13}\text{C}$  NMR (100 MHz,  $\text{CDCl}_3$ )  $\delta$  170.9, 161.5, 149.4, 129.5, 125.7, 123.2, 122.5, 122.1, 121.2, 120.4, 114.8, 109.8, 109.4, 77.2, 55.8, 55.7, 52.4, 38.8; LRMS ( $\text{ESI}^+$ )  $m/z$ : 309.3 ( $\text{M}+\text{H}$ ) $^+$ ; HRMS: calcd for  $\text{C}_{18}\text{H}_{17}\text{N}_2\text{O}_3$  ( $\text{M}+\text{H}$ ) $^+$   $m/z$ : 309.1234; Found 309.1233; IR ( $\text{cm}^{-1}$ , neat) : 3143, 2866, 2717, 1994, 1820, 1654, 1568, 1516.

**Ethyl-2-(2-(trifluoromethyl)-11H-benzo[4,5]imidazo[2,1-a]isoindol-11-yl) acetate (3g)**

Yellow liquid, Yield = 75 %;  $^1\text{H}$  NMR (400 MHz,  $\text{CDCl}_3$ )  $\delta$  8.51 (d,  $J = 8.0$  Hz, 1H), 7.94-7.87 (m, 2H), 7.83 (d,  $J = 8.0$  Hz, 1H), 7.63-7.58 (m, 1H), 7.47-7.39 (m, 2H), 6.00 (t,  $J = 6.2$  Hz, 1H), 4.29-4.17 (m, 2H), 3.29 (dd,  $J = 17.0$ , 5.3 Hz, 1H), 3.05 (dd,  $J = 17.0$ , 6.8 Hz, 1H), 1.24-1.20 (m, 3H);  $^{13}\text{C}$  NMR (100 MHz,  $\text{CDCl}_3$ )  $\delta$  168.5, 151.9, 147.8, 135.5, 135.0 (q,  $J = 32.8$  Hz), 128.7, 127.8 (q,  $J = 3.5$  Hz), 127.3, 127.1, 125.8 (q,  $J = 272.2$  Hz), 127.0, 126.1, 120.9 (q,  $J = 3.8$  Hz), 117.1, 112.0, 62.3, 59.6, 37.1, 14.0; LRMS ( $\text{ESI}^+$ )  $m/z$ : 361.1 ( $\text{M}+\text{H}$ ) $^+$ ; HRMS: calcd for

$C_{19}H_{16}F_3N_2O_2$  (M+H)<sup>+</sup> *m/z*: 361.1158; Found 361.1159; IR (cm<sup>-1</sup>, neat) : 3134, 2754, 1992, 1828, 1793, 1647, 1585, 1506.

**Ethyl-2-(2-chloro-11*H*-benzo[4,5]imidazo[2,1-*a*]isoindol-11-yl)acetate (3h)**

Yellow solid, yield = 65 %; mp = 130-132 °C; <sup>1</sup>H NMR (400 MHz, CDCl<sub>3</sub>) δ 7.94 (d, *J* = 8.1 Hz, 1H), 7.79-7.77 (m, 1H), 7.58-7.57 (m, 1H), 7.47 (dd, *J* = 8.2, 1.8 Hz, 1H), 7.46-7.42 (m, 1H), 7.28 (dd, *J* = 6.1, 3.2 Hz, 2H), 5.71 (t, *J* = 6.3 Hz, 1H), 4.27-4.22 (q, *J* = 7.1 Hz, 2H), 3.18 (dd, *J* = 16.8, 5.5 Hz, 1H), 2.88 (dd, *J* = 16.8, 7.2 Hz, 1H), 1.24 (t, *J* = 7.1 Hz, 3H); <sup>13</sup>C NMR (100 MHz, CDCl<sub>3</sub>) δ 168.6, 152.5, 148.9, 131.1, 128.6, 127.6, 126.6, 126.5, 124.4, 124.2, 121.3, 117.0, 111.7, 62.2, 59.1, 37.2, 14.0; LRMS (ESI<sup>+</sup>) *m/z*: 327.2 (M+H)<sup>+</sup>; HRMS: calcd for C<sub>18</sub>H<sub>16</sub>ClN<sub>2</sub>O<sub>2</sub> *m/z*: 327.0895; Found 327.0887; IR (cm<sup>-1</sup>, neat): 3134, 3028, 2823, 2748, 1994, 1820, 1502, 1406.

**Ethyl-2-(2-methyl-11*H*-benzo[4,5]imidazo[2,1-*a*]isoindol-11-yl)acetate (3i)**

Yellow solid, Yield = 85 %; mp = 115-118 °C; <sup>1</sup>H NMR (400 MHz, CDCl<sub>3</sub>) δ 8.34 (d, *J* = 7.8 Hz, 1H), 7.93-7.87 (m, 1H), 7.58-7.53 (m, 1H), 7.43-7.36 (m, 4H), 5.87 (t, *J* = 6.1 Hz, 1H), 4.22 (q, *J* = 7.1 Hz, 2H), 3.17 (dd, *J* = 16.9, 5.9 Hz, 1H), 3.04 (dd, *J* = 16.9, 6.4 Hz, 1H), 2.50 (s, 3H), 1.21 (t, *J* = 7.1 Hz, 3H); <sup>13</sup>C NMR (100 MHz, CDCl<sub>3</sub>) δ 170.0, 156.4, 147.7, 141.8, 131.0, 130.5, 124.2, 124.1, 123.7, 123.4, 123.1, 119.4, 110.3, 61.6, 56.8, 38.5, 22.0, 14.0; LRMS (ESI<sup>+</sup>) *m/z*: 307.3 (M+H)<sup>+</sup>; HRMS: calcd for C<sub>19</sub>H<sub>19</sub>N<sub>2</sub>O<sub>2</sub> (M+H)<sup>+</sup> *m/z*: 307.1441; Found 307.1442; IR (cm<sup>-1</sup>, neat): 3134, 2947, 2862, 2754, 1992, 1890, 1828, 1664, 1519.

**Cyclohexyl 2-(11*H*-benzo[4,5]imidazo[2,1-*a*]isoindol-11-yl)acetate (3j)**

Yellow solid, yield = 62 %; mp = 199-202 °C; <sup>1</sup>H NMR (400 MHz, CDCl<sub>3</sub>) δ 8.05-8.00 (m, 1H), 7.84-7.79 (m, 1H), 7.56-7.52 (m, 1H), 7.52-7.43 (m, 3H), 7.27-7.23 (m, 3H), 5.70 (t, *J* = 6.2 Hz, 1H), 4.84 (m, 1H), 3.14 (dd, *J* = 16.5, 5.7 Hz, 1H), 2.90 (dd, *J* = 16.5, 6.8 Hz, 1H), 1.82-1.75 (m, 2H), 1.69-1.61 (m, 2H), 1.50 (d, *J* = 12.6 Hz, 1H), 1.38-1.24 (m, 5H); <sup>13</sup>C NMR (100 MHz, CDCl<sub>3</sub>) δ 169.6, 157.5, 148.5, 147.3, 132.0, 129.8, 129.2, 128.8, 123.5, 122.8, 122.3, 122.1, 120.6, 109.9, 74.1, 56.1, 39.1, 31.4, 31.4, 25.2, 23.6, 23.6; LRMS (ESI<sup>+</sup>) *m/z* : 347.2 (M+H)<sup>+</sup>; HRMS: calcd for C<sub>22</sub>H<sub>23</sub>N<sub>2</sub>O<sub>2</sub> *m/z*: 347.1754; Found 347.1759; IR (cm<sup>-1</sup>, neat): 3236, 2754, 2754, 1867, 1832, 1570, 1508.

**Butyl 2-(11*H*-benzo[4,5]imidazo[2,1-*a*]isoindol-11-yl)acetate (3k)**

Yellow liquid, Yield = 67 %; <sup>1</sup>H NMR (400 MHz, CDCl<sub>3</sub>) δ 8.04 (d, *J* = 7.4 Hz, 1H), 7.87-7.80 (m, 1H), 7.57-7.41 (m, 4H), 7.30-7.23 (m, 3H), 5.71 (t, *J* = 6.4 Hz, 1H), 4.17 (t, *J* = 6.7 Hz, 2H), 3.12 (dd, *J* = 16.6, 5.9 Hz, 1H), 2.90 (dd, *J* = 16.6, 6.8 Hz, 1H), 1.56 (p, *J* = 6.9 Hz, 2H), 1.28 (m, 2H), 0.89 (t, *J* = 7.4 Hz, 3H); <sup>13</sup>C NMR (100 MHz, CDCl<sub>3</sub>) δ 170.4, 157.4, 148.6, 147.3, 132.0, 129.9, 129.2, 128.7, 123.5, 122.9, 122.3, 122.1, 120.6, 109.8, 65.4, 56.0, 38.8, 30.4, 19.0, 13.6; LRMS (ESI<sup>+</sup>) *m/z*: 321.3 (M+H)<sup>+</sup>; HRMS: calcd for C<sub>20</sub>H<sub>21</sub>N<sub>2</sub>O<sub>2</sub> (M+H)<sup>+</sup> *m/z*: 321.1598; Found 321.1602; IR (cm<sup>-1</sup>, neat): 3147, 3006, 1830, 1652, 1570, 1504.

**Ethyl 2-(11*H*-benzo[4,5]imidazo[2,1-*a*]isoindol-11-yl)acetate (3l)**

Yellow liquid, yield = 65 %; <sup>1</sup>H NMR (400 MHz, CDCl<sub>3</sub>) δ 8.05 (d, *J* = 7.3 Hz, 1H), 7.85-7.80 (m, 1H), 7.58-7.41 (m, 4H), 7.30-7.23 (m, 3H), 5.71 (t, *J* = 6.4 Hz, 1H), 4.23 (m, 2H), 3.14 (dd, *J* = 16.6, 5.9 Hz, 1H), 2.89 (dd, *J* = 16.6, 6.8 Hz, 1H), 1.23 (t, *J* = 7.1 Hz, 3H); <sup>13</sup>C NMR (100 MHz, CDCl<sub>3</sub>) δ 170.3, 157.5, 148.6, 147.3, 132.0, 129.9, 129.2, 128.8, 123.5, 122.8, 122.3, 122.1, 120.7, 109.8, 61.4, 56.0, 38.9, 14.1; LRMS (ESI<sup>+</sup>) *m/z*: 293.2 (M+H)<sup>+</sup>; HRMS: calcd for C<sub>18</sub>H<sub>17</sub>N<sub>2</sub>O<sub>2</sub> (M+H)<sup>+</sup> *m/z*: 293.1285; Found 293.1284; IR (cm<sup>-1</sup>, neat): 3145, 2781, 1994, 1830, 1652, 1570, 1517.

**Tert-butyl 2-(11*H*-benzo[4,5]imidazo[2,1-*a*]isoindol-11-yl)acetate (3m)**

Yellow solid, yield = 50 %; mp = 199-202 °C; <sup>1</sup>H NMR (400 MHz, CDCl<sub>3</sub>) δ 8.04 (d, *J* = 7.3 Hz, 1H), 7.86-7.80 (m, 1H), 7.59-7.45 (m, 4H), 7.30-7.25 (m, 3H), 5.67 (t, *J* = 6.0 Hz, 1H), 3.10 (dd, *J* = 16.4, 5.5 Hz, 1H), 2.91 (dd, *J* = 16.4, 6.6 Hz, 1H), 1.37 (s, 9H); <sup>13</sup>C NMR (100 MHz, CDCl<sub>3</sub>) δ 169.3, 157.5, 148.6, 147.4, 132.1, 129.8, 129.1, 128.9, 123.5, 122.7, 122.2, 122.0, 120.6, 110.0, 82.0, 56.0, 39.7, 27.8; LRMS (ESI<sup>+</sup>) *m/z*: 321.3 (M+H)<sup>+</sup>; HRMS: calcd for C<sub>20</sub>H<sub>21</sub>N<sub>2</sub>O<sub>2</sub> (M+H)<sup>+</sup> *m/z*: 321.1598; Found 321.1611; IR (cm<sup>-1</sup>, neat): 3026, 2835, 1865, 1795, 1656, 1568, 1519, 1407.

**Benzyl 2-(11*H*-benzo[4,5]imidazo[2,1-*a*]isoindol-11-yl)acetate (3n)**

Yellow liquid, yield = 62 %; <sup>1</sup>H NMR (400 MHz, CDCl<sub>3</sub>) δ 8.03 (d, *J* = 7.6 Hz, 1H), 7.83 (d, *J* = 8.1 Hz, 1H), 7.56-7.18 (m, 11H), 5.73 (t, *J* = 6.4 Hz, 1H), 5.23 (s, 2H), 3.20 (dd, *J* = 16.6, 5.9 Hz, 1H), 2.94 (dd, *J* = 16.6, 6.9 Hz, 1H); <sup>13</sup>C NMR (100 MHz, CDCl<sub>3</sub>) δ 170.2, 157.4, 148.6, 147.2,

135.0, 132.0, 129.9, 129.3, 128.7, 128.7, 128.6, 128.6, 123.5, 122.9, 122.3, 122.1, 120.7, 109.8, 67.3, 55.9, 38.9; LRMS (ESI<sup>+</sup>)  $m/z$ : 355.2 (M+H)<sup>+</sup>; HRMS: calcd for C<sub>23</sub>H<sub>19</sub>N<sub>2</sub>O<sub>2</sub> (M+H)<sup>+</sup>  $m/z$  : 355.1441, Found 355.1446; IR (cm<sup>-1</sup>, neat): 3147, 2829, 2783, 2756, 2023, 1834, 1654, 1570, 1512.

**Methyl-11-(2-methoxy-2-oxoethyl)-11H-benzo[4,5]imidazo[2,1-a]isoindole-7-carboxylate (3o)**

Inseparable mixture, yellow liquid, yield = 53 % ; <sup>1</sup>H NMR (400 MHz, CDCl<sub>3</sub>) δ 8.53 (d,  $J$  = 1.0 Hz, 1H), 8.17 – 8.15 (m, 1H), 8.08 (d,  $J$  = 6.6 Hz, 2H), 8.03-7.99 (m, 2H), 7.84 (d,  $J$  = 8.6 Hz, 1H), 7.60 -7.54 (m, 6H), 7.46 (d,  $J$  = 8.5 Hz, 1H), 5.85-5.73 (m, 2H), 3.96 (d,  $J$  = 2.6 Hz, 6H), 3.84 (s, 3H), 3.80 (s, 3H), 3.21-3.12 (m, 2H), 2.98-2.92 (m, 2H); LRMS (ESI<sup>+</sup>)  $m/z$  : 337.2 (M+H)<sup>+</sup>; HRMS: calcd for C<sub>19</sub>H<sub>17</sub>N<sub>2</sub>O<sub>4</sub> (M+H)<sup>+</sup>  $m/z$ : 337.1183; Found 337.1184; IR (cm<sup>-1</sup>, neat) : 3134, 3093, 2756, 1994, 1847, 1641, 1502,

**Methyl-2-(7-methyl-11H-benzo[4,5]imidazo[2,1-a]isoindol-11-yl)acetate (3p)**

Inseparable mixture, yellow liquid, yield = 50 %; <sup>1</sup>H NMR (400 MHz, CDCl<sub>3</sub>) δ 8.03-7.99 (m, 2H), 7.69 (d,  $J$  = 8.2 Hz, 1H), 7.60-7.59 (m, 1H), 7.54-7.45 (m, 6H), 7.29 (d,  $J$  = 8.2 Hz, 1H), 7.21-7.20 (m, 1H), 7.10-7.06 (m, 2H), 5.74-5.60 (m, 2H), 3.80 (s, 3H), 3.79 (s, 3H), 3.20- 3.09 (m, 2H), 2.89-2.81 (m, 2H), 2.49 (s, 3H), 2.48 (s, 3H); LRMS (ESI<sup>+</sup>)  $m/z$ : 293.2 (M+H)<sup>+</sup>; HRMS: calcd for C<sub>18</sub>H<sub>17</sub>N<sub>2</sub>O<sub>2</sub> (M+H)<sup>+</sup>  $m/z$ : 293.1285; Found 293.1286; IR (cm<sup>-1</sup>, neat): 3143, 2781, 1996, 1909, 1654, 1506.

**Methyl 2-(7-nitro-11H-benzo[4,5]imidazo[2,1-a]isoindol-11-yl)acetate (3q)**

Inseparable mixture, yellow solid, yield = 60 %; mp = 145-148 °C; <sup>1</sup>H NMR (400 MHz, CDCl<sub>3</sub>) δ 8.71 (d,  $J$  = 2.2 Hz, 1H), 8.41 (d,  $J$  = 2.2 Hz, 1H), 8.25-8.20 (m, 2H), 8.12-8.07 (m, 2H), 7.86 (d,  $J$  = 8.9 Hz, 1H), 7.65-7.57 (m, 6H), 7.53 (d,  $J$  = 9.0 Hz, 1H), 5.84 (dt,  $J$  = 12.5, 6.3 Hz, 2H), 3.86 (s, 3H), 3.81 (s, 3H), 3.14-3.00 (m, 4H); LRMS (ESI<sup>+</sup>)  $m/z$ : 324.2 (M+H)<sup>+</sup>; HRMS: calcd for C<sub>17</sub>H<sub>14</sub>N<sub>3</sub>O<sub>4</sub> (M+H)<sup>+</sup>  $m/z$ : 324.0979; Found 324.0981; IR (cm<sup>-1</sup>, neat): 3136, 3026, 2785, 1849, 1838, 1649, 1568, 1398

**Methyl 2-(7-fluoro-11H-benzo[4,5]imidazo[2,1-a]isoindol-11-yl)acetate (3r)**

Brown solid, yield = 51 %; mp = 126-129 °C; <sup>1</sup>H NMR (400 MHz, CDCl<sub>3</sub>) δ 8.02 (d, *J* = 7.1 Hz, 1H), 7.75 – 7.71 (m, 1H), 7.57 – 7.51 (m, 3H), 7.16 (dd, *J* = 8.7, 2.5 Hz, 1H), 7.04 – 7.00 (m, 1H), 5.73 (t, *J* = 6.4 Hz, 1H), 3.82 (s, 3H), 3.07 (dd, *J* = 16.7, 6.5 Hz, 1H), 2.94 (dd, *J* = 16.8, 6.3 Hz, 1H); <sup>13</sup>C NMR (100 MHz, CDCl<sub>3</sub>) δ 170.9, 146.9, 145.0, 130.0, 129.4, 128.5, 123.5, 122.2, 122.0, 121.2, 121.1, 110.6, 110.4, 97.1, 96.8, 56.1, 52.5, 38.7; LRMS (ESI<sup>+</sup>) *m/z*: 297.1 (M+H)<sup>+</sup>; HRMS: calcd for C<sub>17</sub>H<sub>14</sub>FN<sub>2</sub>O<sub>2</sub> (M+H)<sup>+</sup> *m/z*: 297.1034; Found 297.1035; IR (cm<sup>-1</sup>, neat) : 3147, 2879, 2756, 1998, 1905, 1830, 1780, 1652, 1508

**Methyl 2-(7-chloro-11*H*-benzo[4,5]imidazo[2,1-*a*]isoindol-11-yl) acetate (3s)**

Yellow solid, yield = 70 %; mp = 122-125 °C; <sup>1</sup>H NMR (400 MHz, CDCl<sub>3</sub>) δ 8.04 (d, *J* = 7.2 Hz, 1H), 7.73 (d, *J* = 8.7 Hz, 1H), 7.58 – 7.48 (m, 3H), 7.45 (d, *J* = 2.1 Hz, 1H), 7.25 (m, 1H), 5.73 (t, *J* = 6.4 Hz, 1H), 3.82 (s, 3H), 3.10 (dd, *J* = 16.7, 6.3 Hz, 1H), 2.93 (dd, *J* = 16.7, 6.6 Hz, 1H); <sup>13</sup>C NMR (101 MHz, CDCl<sub>3</sub>) δ 170.8, 147.3, 147.1, 130.2, 129.4, 128.6, 128.3, 123.6, 123.0, 122.3, 121.4, 110.0, 56.2, 52.5, 38.7; LRMS (ESI<sup>+</sup>) *m/z*: 313.2 (M+H)<sup>+</sup>; HRMS: calcd for C<sub>17</sub>H<sub>14</sub>ClN<sub>2</sub>O<sub>2</sub> (M+H)<sup>+</sup> *m/z*: 313.0738; Found 313.0747; IR (cm<sup>-1</sup>, neat): 3143, 3035, 2881, 2796, 1909, 1834, 1643, 1597, 1502

**Methyl 2-(7-bromo-11*H*-benzo[4,5]imidazo[2,1-*a*]isoindol-11-yl)acetate (3t)**

Brown solid, yield = 62 %; mp = 134-137 °C; <sup>1</sup>H NMR (400 MHz, CDCl<sub>3</sub>) δ 8.04 (dd, *J* = 7.2, 1.2 Hz, 1H), 7.69 (dd, *J* = 7.2, 1.2 Hz, 1H), 7.60 – 7.49 (m, 4H), 7.37 (dd, *J* = 8.6, 1.9 Hz, 1H), 5.71 (t, *J* = 6.4 Hz, 1H), 3.81 (s, 3H), 3.09 (dd, *J* = 16.6, 6.3 Hz, 1H), 2.92 (dd, *J* = 16.6, 6.5 Hz, 1H); <sup>13</sup>C NMR (100 MHz, CDCl<sub>3</sub>) δ 170.7, 147.1, 130.4, 129.5, 125.7, 123.5, 123.1, 122.4, 121.7, 121.2, 113.0, 110.1, 56.3, 56.3, 52.5, 38.7, 38.6; LRMS (ESI<sup>+</sup>) *m/z*: 357.0 (M+H)<sup>+</sup>; HRMS: calcd for C<sub>17</sub>H<sub>14</sub>BrN<sub>2</sub>O<sub>2</sub> (M+H)<sup>+</sup> *m/z*: 357.0233; Found 357.0235; IR (cm<sup>-1</sup>, neat) : 3141, 3039, 2792, 1998, 1907, 1834, 1660, 1502

**Methyl 2-(6-methyl-11*H*-benzo[4,5]imidazo[2,1-*a*]isoindol-11-yl)acetate (3u)**

Yellow solid, yield = 65 %; mp = 102-105 °C; <sup>1</sup>H NMR (400 MHz, CDCl<sub>3</sub>) δ 8.15 (d, *J* = 7.5 Hz, 1H), 7.57 – 7.46 (m, 3H), 7.28 (d, *J* = 7.9 Hz, 1H), 7.18 (t, *J* = 7.7 Hz, 1H), 7.10 (d, *J* = 7.3 Hz, 1H), 5.73 (t, *J* = 6.5 Hz, 1H), 3.80 (s, 3H), 3.19 (dd, *J* = 16.7, 5.8 Hz, 1H), 2.85 (dd, *J* = 16.7, 7.1 Hz, 1H), 2.74 (s, 3H); <sup>13</sup>C NMR (100 MHz, CDCl<sub>3</sub>) δ 170.9, 147.2, 130.7, 129.8, 129.3, 123.5, 122.9, 122.9, 122.3, 107.3, 55.9, 52.4, 38.7, 29.9, 17.1; LRMS (ESI<sup>+</sup>) *m/z*: 293.2 (M+H)<sup>+</sup>;

HRMS: calcd for C<sub>18</sub>H<sub>17</sub>N<sub>2</sub>O<sub>2</sub> (M+H)<sup>+</sup> *m/z*: 293.1285; Found 293.1287; R (cm<sup>-1</sup>, neat): 3136, 3006, 2881, 2760, 1998, 1838, 1641, 1571, 1512

**Methyl (E)-3-(2-(1*H*-benzo[*d*]imidazol-2-yl)furan-3-yl)acrylate (4b)**

<sup>1</sup>H NMR (400 MHz, CDCl<sub>3</sub>) δ 7.90 – 7.84 (m, 1H), 7.82 – 7.78 (m, 1H), 7.62 – 7.52 (m, 4H), 7.44 – 7.34 (m, 3H), 6.42 (d, *J* = 16.0 Hz, 1H), 3.70 (s, 3H), 3.62 (s, 3H); LRMS (ESI<sup>+</sup>) *m/z*: 269.1 (M+H)<sup>+</sup>; HRMS: calcd for C<sub>15</sub>H<sub>13</sub>N<sub>2</sub>O<sub>3</sub> (M+H)<sup>+</sup> *m/z*: 269.0921; Found 269.0921.

**Methyl (E)-3-(2-(1*H*-benzo[*d*]imidazol-2-yl)thiophen-3-yl)acrylate (4c)**

<sup>1</sup>H NMR (400 MHz, CDCl<sub>3</sub>) δ 7.85 (d, *J* = 8.0 Hz, 1H), 7.54 (d, *J* = 5.4 Hz, 1H), 7.44 – 7.33 (m, 5H), 7.10 (d, *J* = 5.4 Hz, 1H), 3.83 (s, 3H); LRMS (ESI<sup>+</sup>) *m/z*: 285.1 (M+H)<sup>+</sup>; HRMS: calcd for C<sub>15</sub>H<sub>13</sub>N<sub>2</sub>O<sub>2</sub>S (M+H)<sup>+</sup> *m/z*: 285.0692.0921; Found 285.0694.

**Methyl (E)-3-(2-(1-methyl-1*H*-benzo[*d*]imidazol-2-yl)phenyl)acrylate (6a)**

<sup>1</sup>H NMR (400 MHz, CDCl<sub>3</sub>) δ 7.90 – 7.84 (m, 1H), 7.82 – 7.78 (m, 1H), 7.62 – 7.52 (m, 4H), 7.44 – 7.34 (m, 3H), 6.42 (d, *J* = 16.0 Hz, 1H), 3.70 (s, 3H), 3.62 (s, 3H); <sup>13</sup>C NMR (100 MHz, CDCl<sub>3</sub>) δ 166.8, 151.8, 141.6, 134.5, 131.4, 130.3, 129.9, 126.8, 123.1, 122.7, 120.4, 120.1, 109.7, 51.7, 31.0; LRMS (ESI<sup>+</sup>) *m/z*: 293.2 (M+H)<sup>+</sup>; HRMS: calcd for C<sub>18</sub>H<sub>17</sub>N<sub>2</sub>O<sub>2</sub> (M+H)<sup>+</sup> *m/z*: 293.1285; Found 293.1285.

**Methyl 3-(2-(1-methyl-1*H*-benzo[*d*]imidazol-2-yl)phenyl)propanoate (7a)**

<sup>1</sup>H NMR (400 MHz, CDCl<sub>3</sub>) δ 7.88 – 7.81 (m, 1H), 7.47 – 7.32 (m, 7H), 3.64 (s, 3H), 3.55 (s, 3H), 2.94 (t, *J* = 7.7 Hz, 2H), 2.54 (t, *J* = 7.7 Hz, 2H); <sup>13</sup>C NMR (100 MHz, CDCl<sub>3</sub>) δ 173.1, 152.8, 140.7, 135.3, 130.5, 130.1, 129.4, 126.3, 122.80, 122.4, 119.8, 109.6, 51.5, 34.9, 30.7, 28.3; LRMS (ESI<sup>+</sup>) *m/z*: 295.2 (M+H)<sup>+</sup>; HRMS: calcd for C<sub>18</sub>H<sub>19</sub>N<sub>2</sub>O<sub>2</sub> (M+H)<sup>+</sup> *m/z*: 295.1441; Found 295.1447.



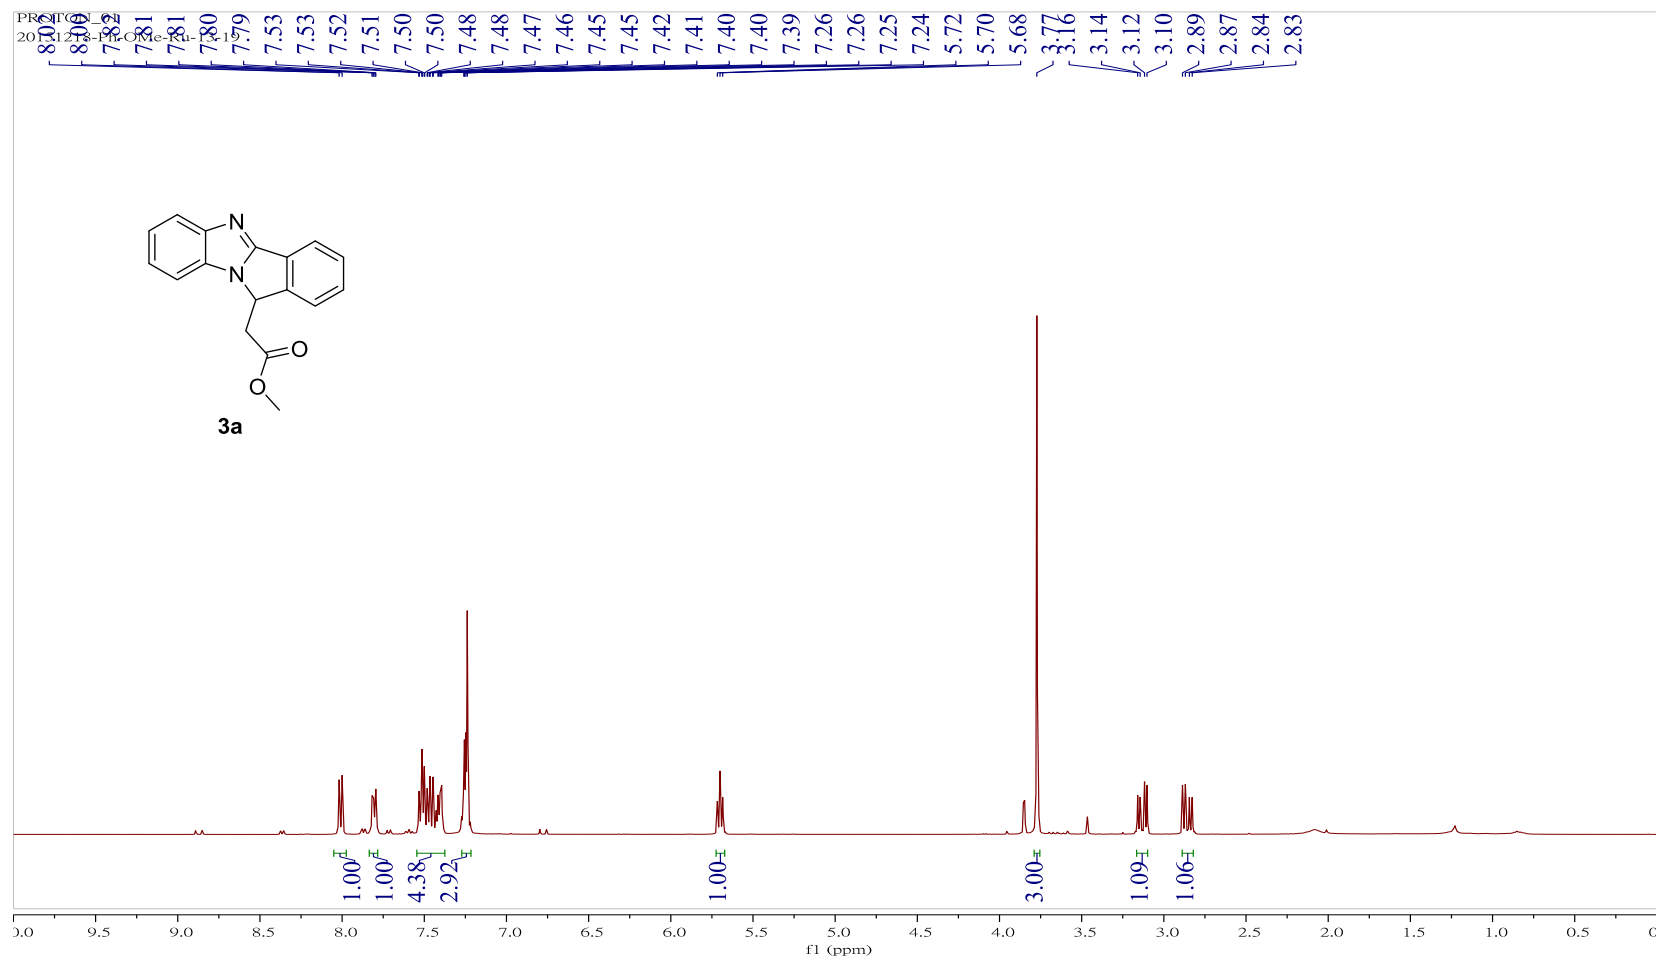

$^1\text{H}$  NMR Spectrum (400 MHz) of compound **3a** in  $\text{CDCl}_3$

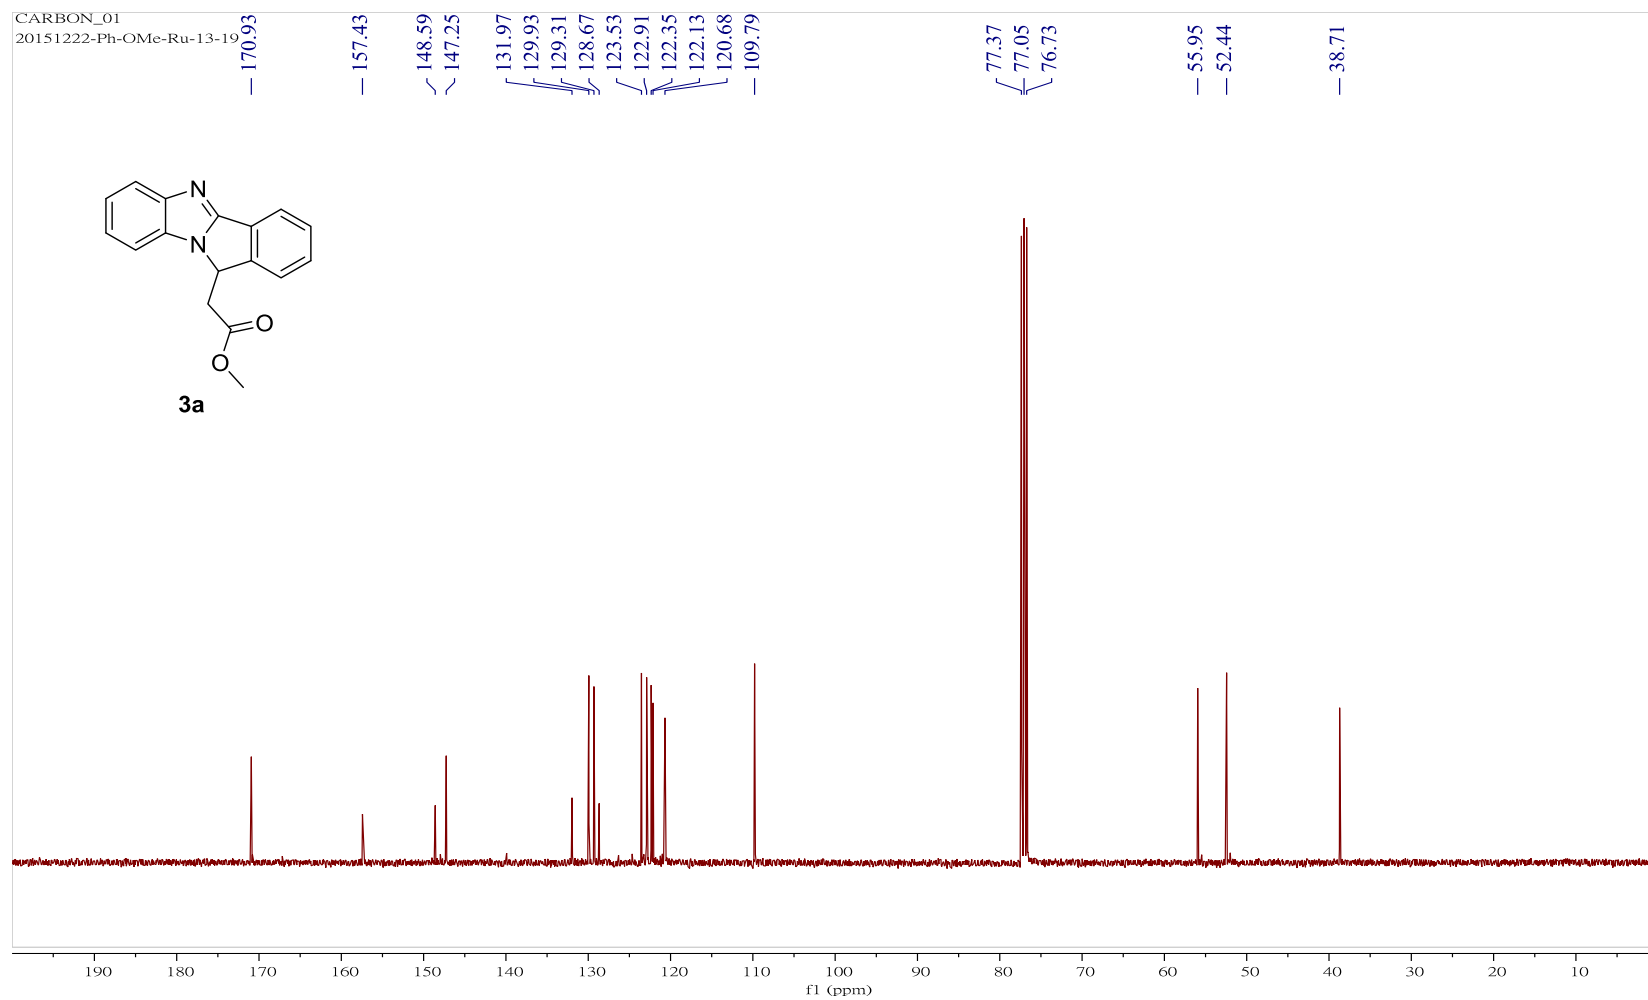

$^{13}\text{C}$  NMR Spectrum (100 MHz) of compound **3a** in  $\text{CDCl}_3$

**Ph-OMe-Ru--20**

20151222005 22 (1.507) Cn (Cen,3, 50.00, Ht); Sm (Mn, 2x0.75); Sb (3,50.00 ); Cm (21:25-2:5)

Scan ES+  
4.87e7

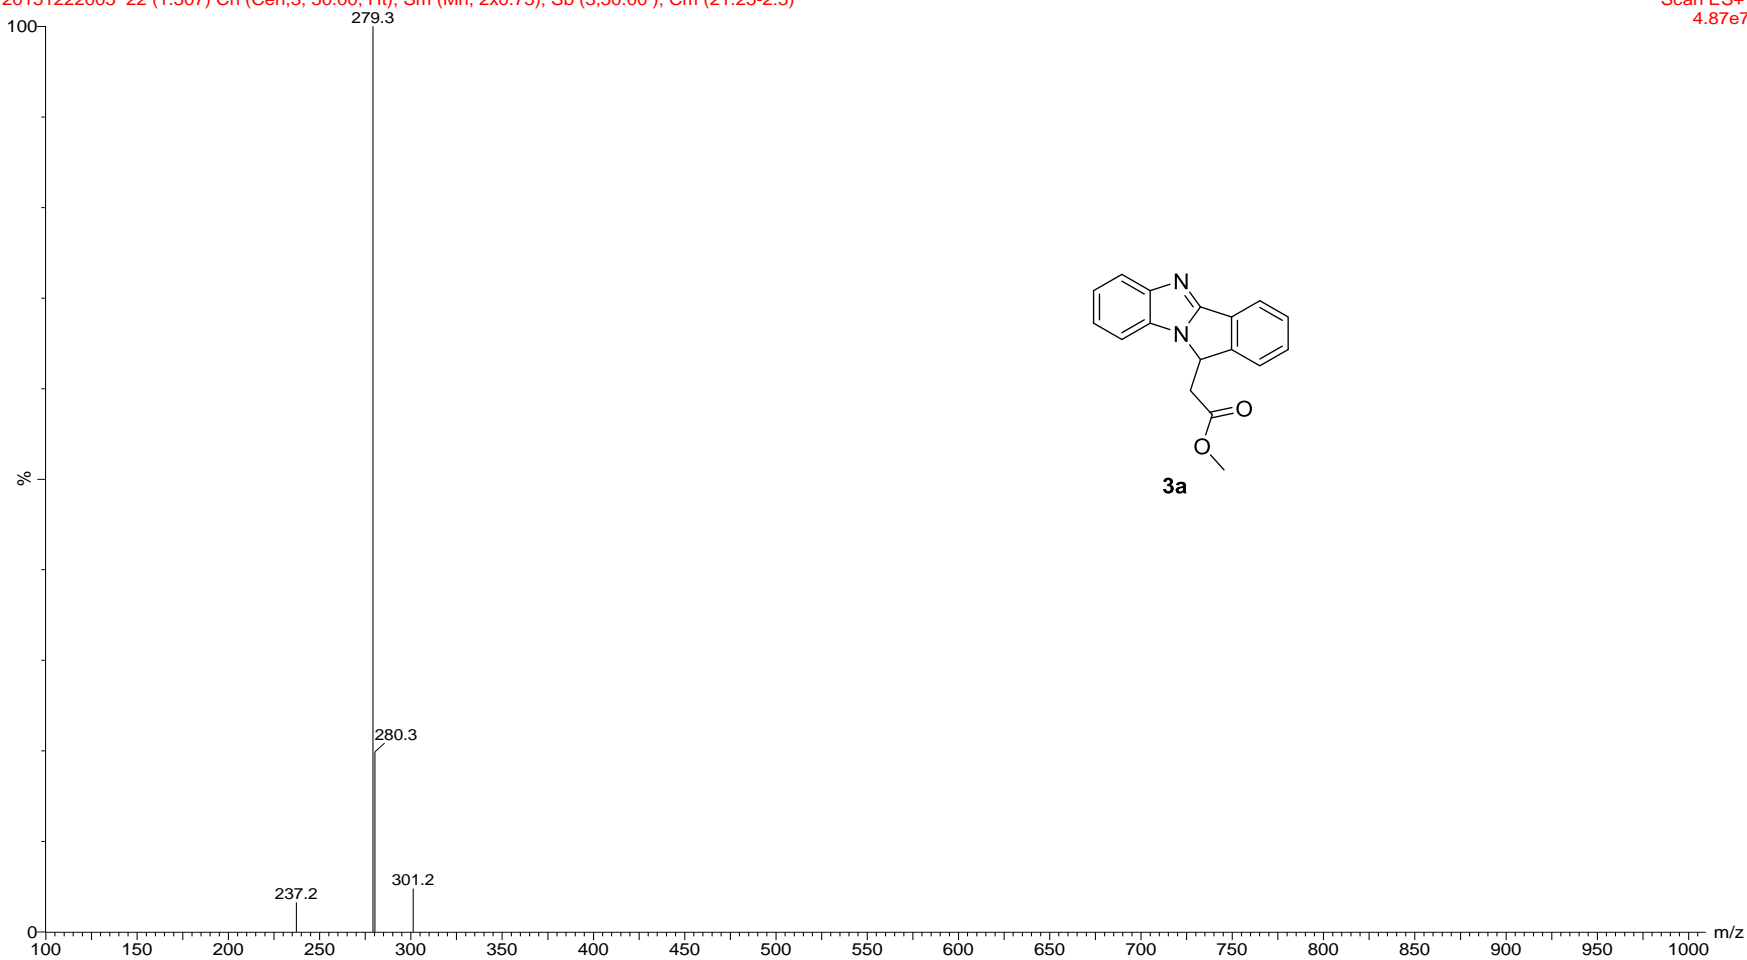

ESI<sup>+</sup> Mass spectrum of compound **3a**

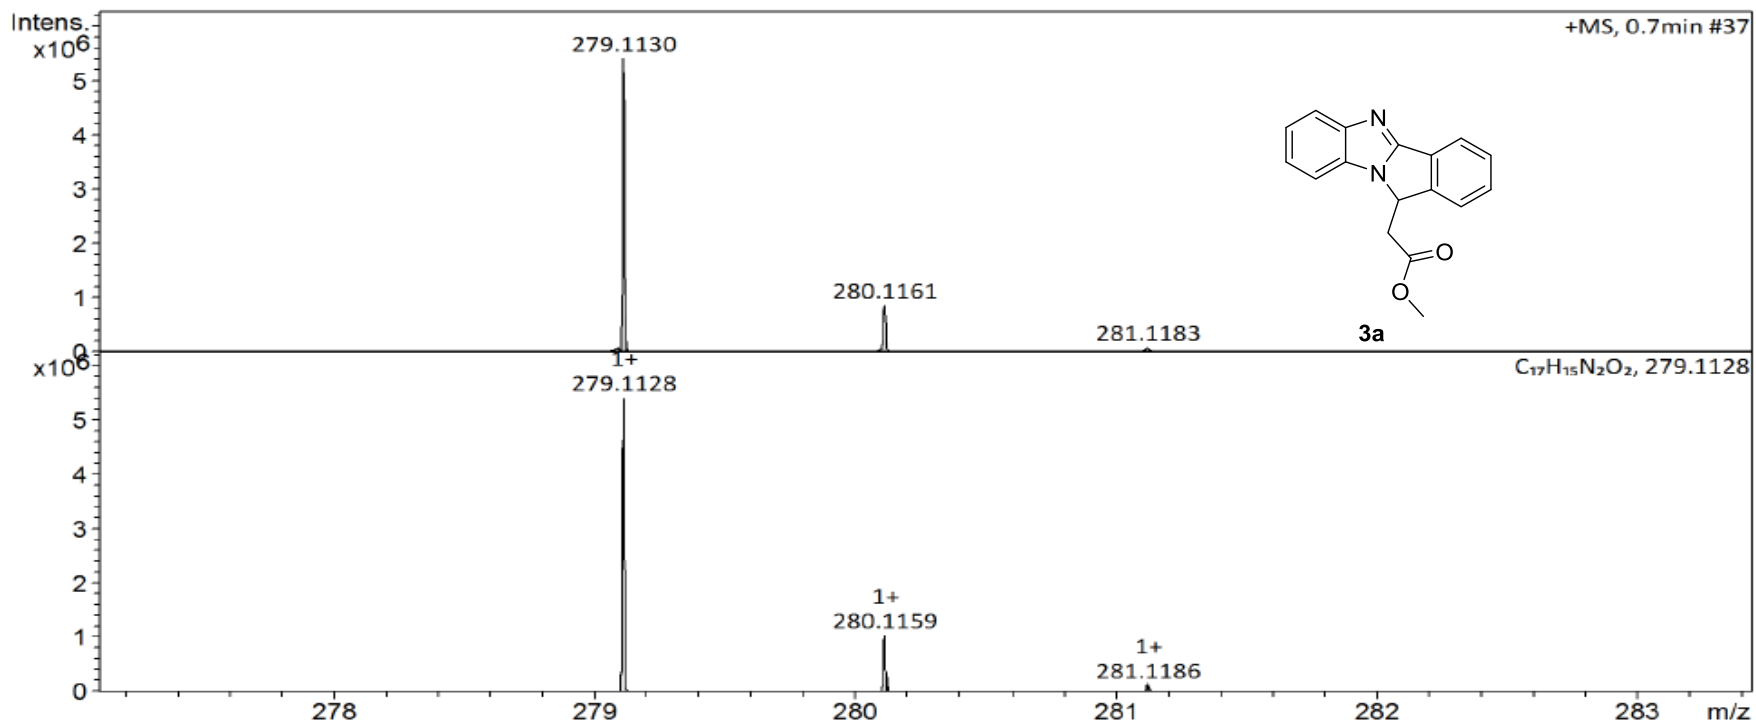

| Meas. m/z | # | Ion Formula                                                   | m/z      | err [ppm] | mSigma | # Sigma | Score  | rdb  | e <sup>-</sup> Conf | N-Rule | Adduct |
|-----------|---|---------------------------------------------------------------|----------|-----------|--------|---------|--------|------|---------------------|--------|--------|
| 279.1130  | 1 | C <sub>17</sub> H <sub>15</sub> N <sub>2</sub> O <sub>2</sub> | 279.1128 | 0.7       | 19.4   | 1       | 100.00 | 11.5 | even                | ok     | M+H    |

High resolution mass (ESI)<sup>+</sup> spectrum of compound of **3a**

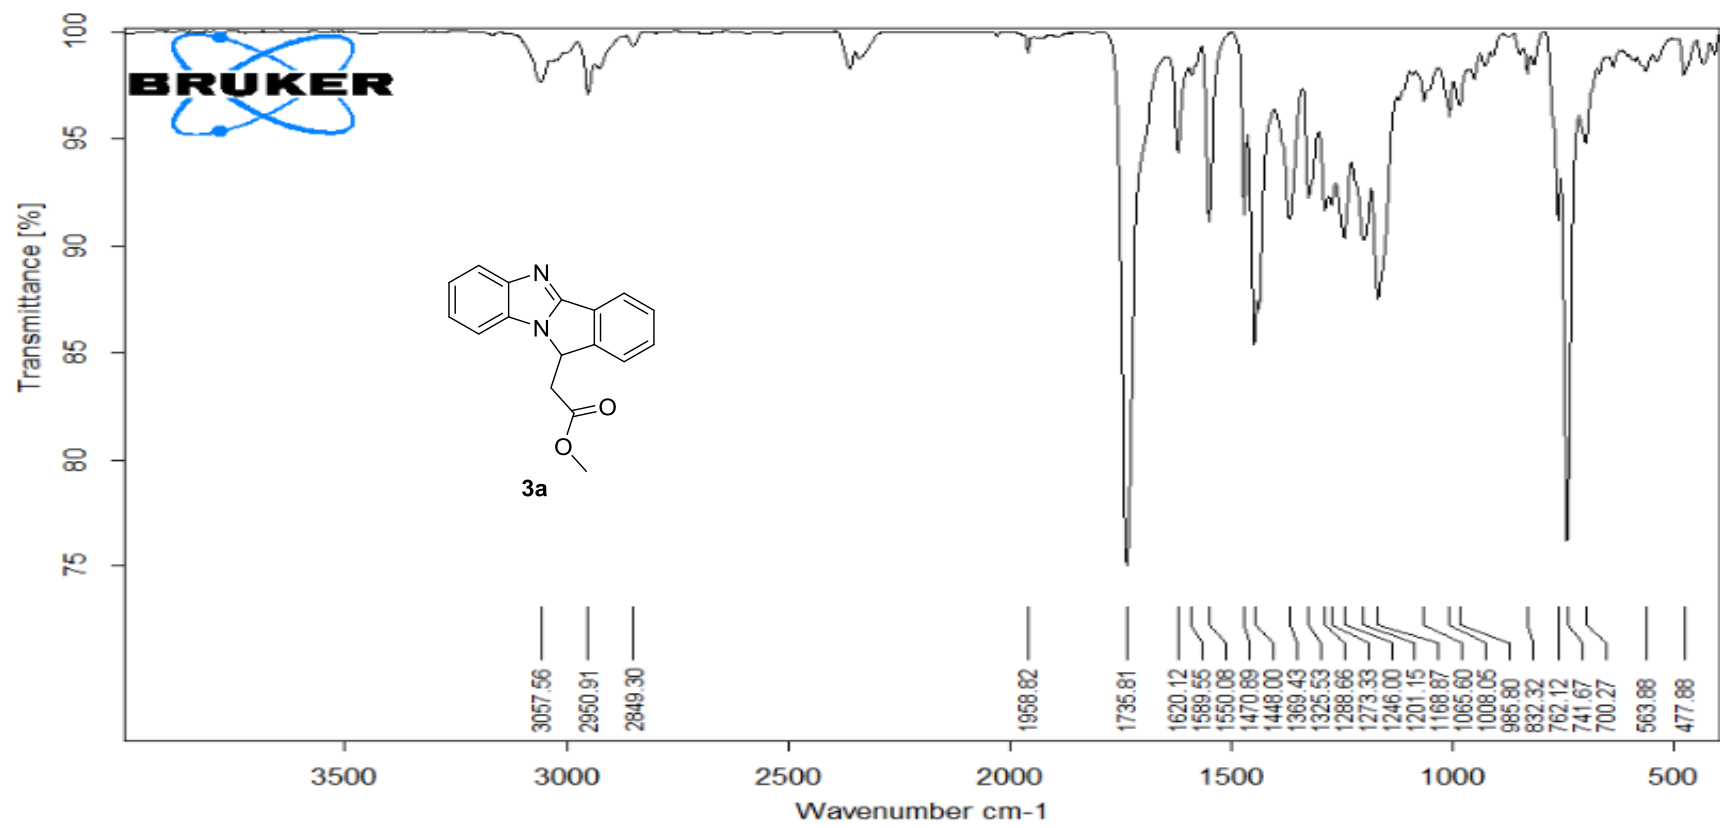

IR spectrum of compound of **3a**

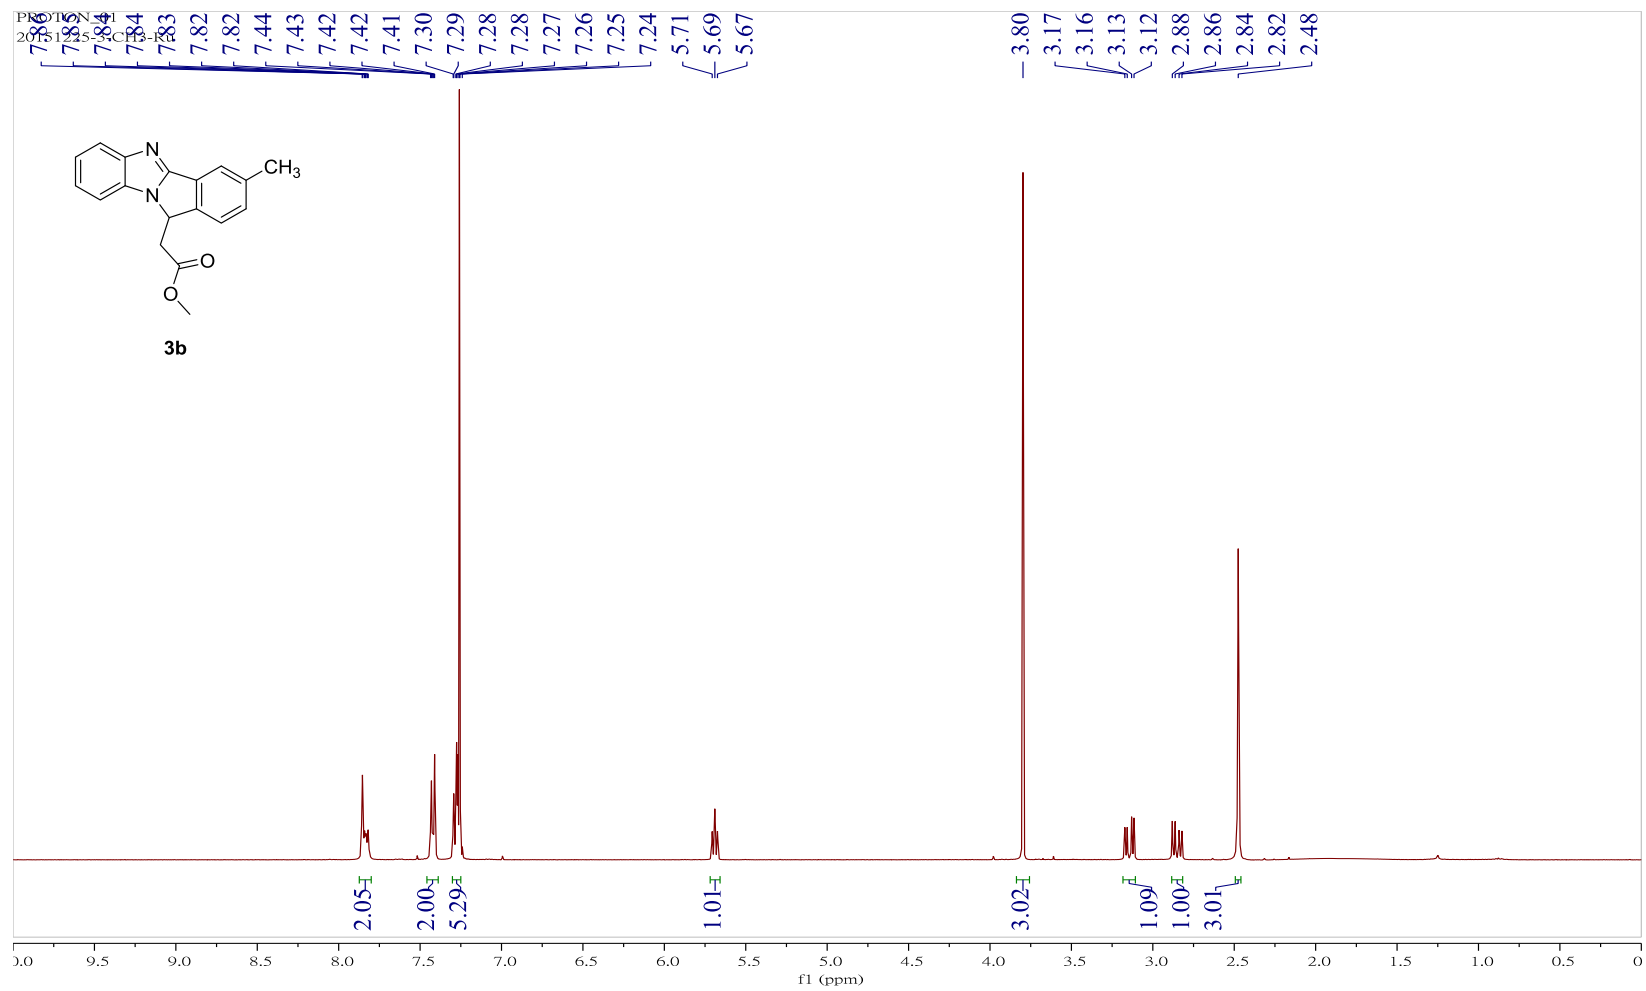

<sup>1</sup>H NMR Spectrum (400 MHz) of compound **3b** in CDCl<sub>3</sub>

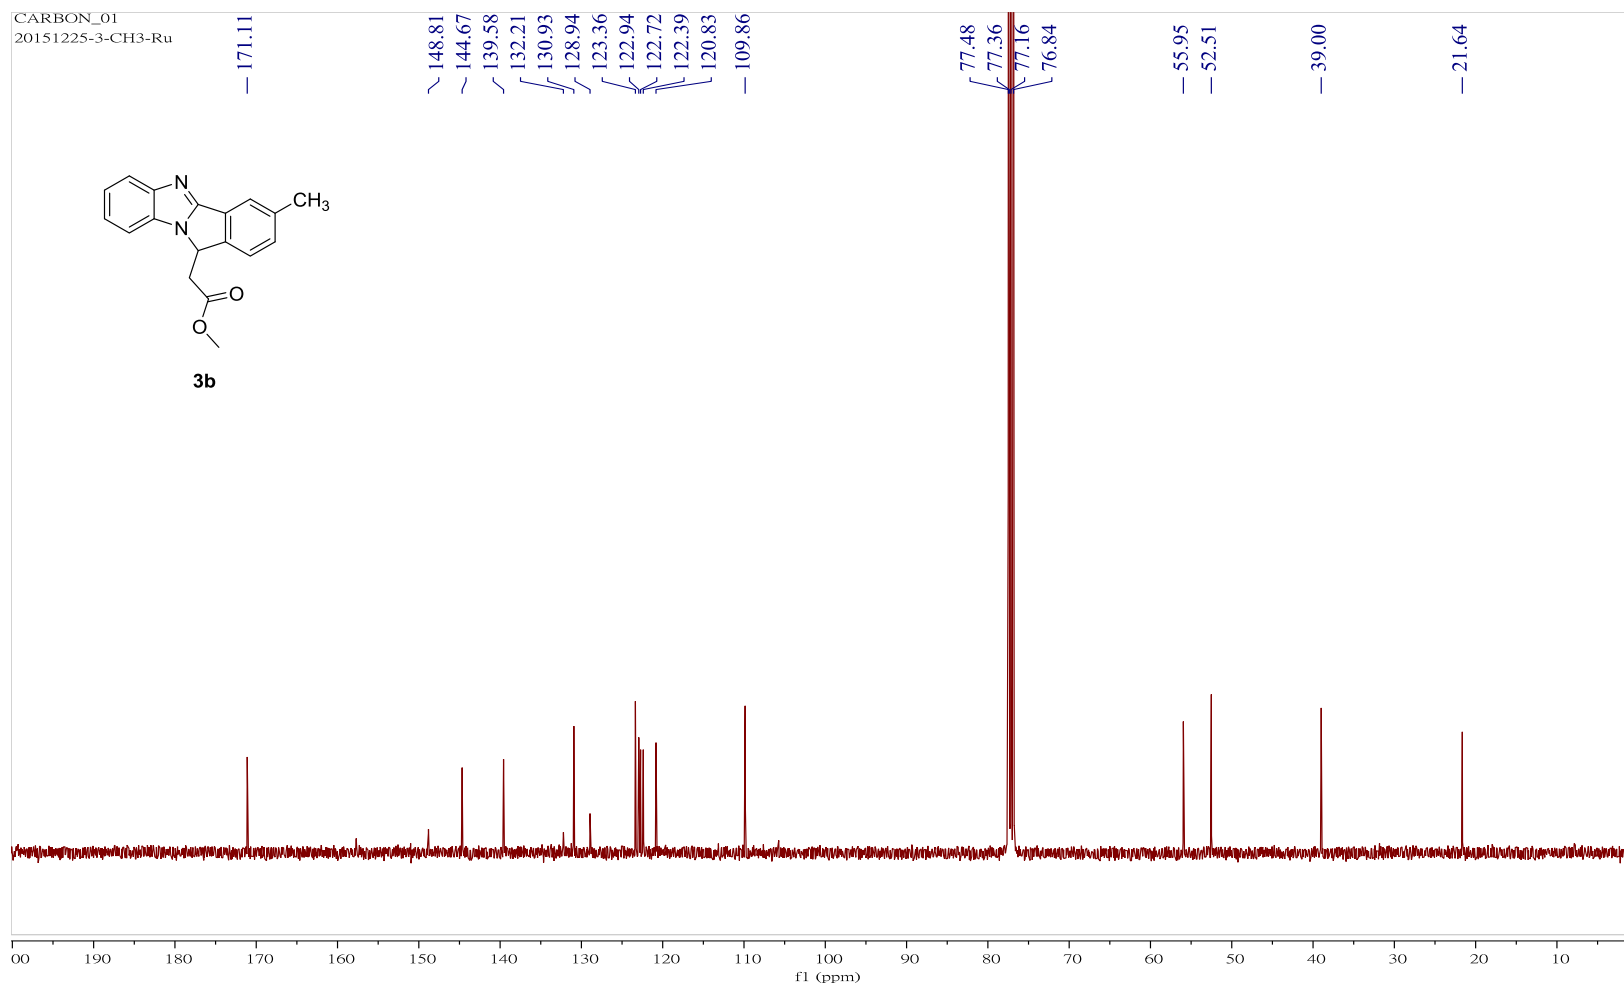

$^{13}\text{C}$  NMR Spectrum (100 MHz) of compound **3b**  $\text{CDCl}_3$

**3-CH3-Ru pen-out**

201512290039 14 (0.959) Cn (Cen,3, 50.00, Ht); Sm (Mn, 2x0.75); Sb (3,50.00); Cm (11:17-3:9)

Scan ES+  
1.24e8

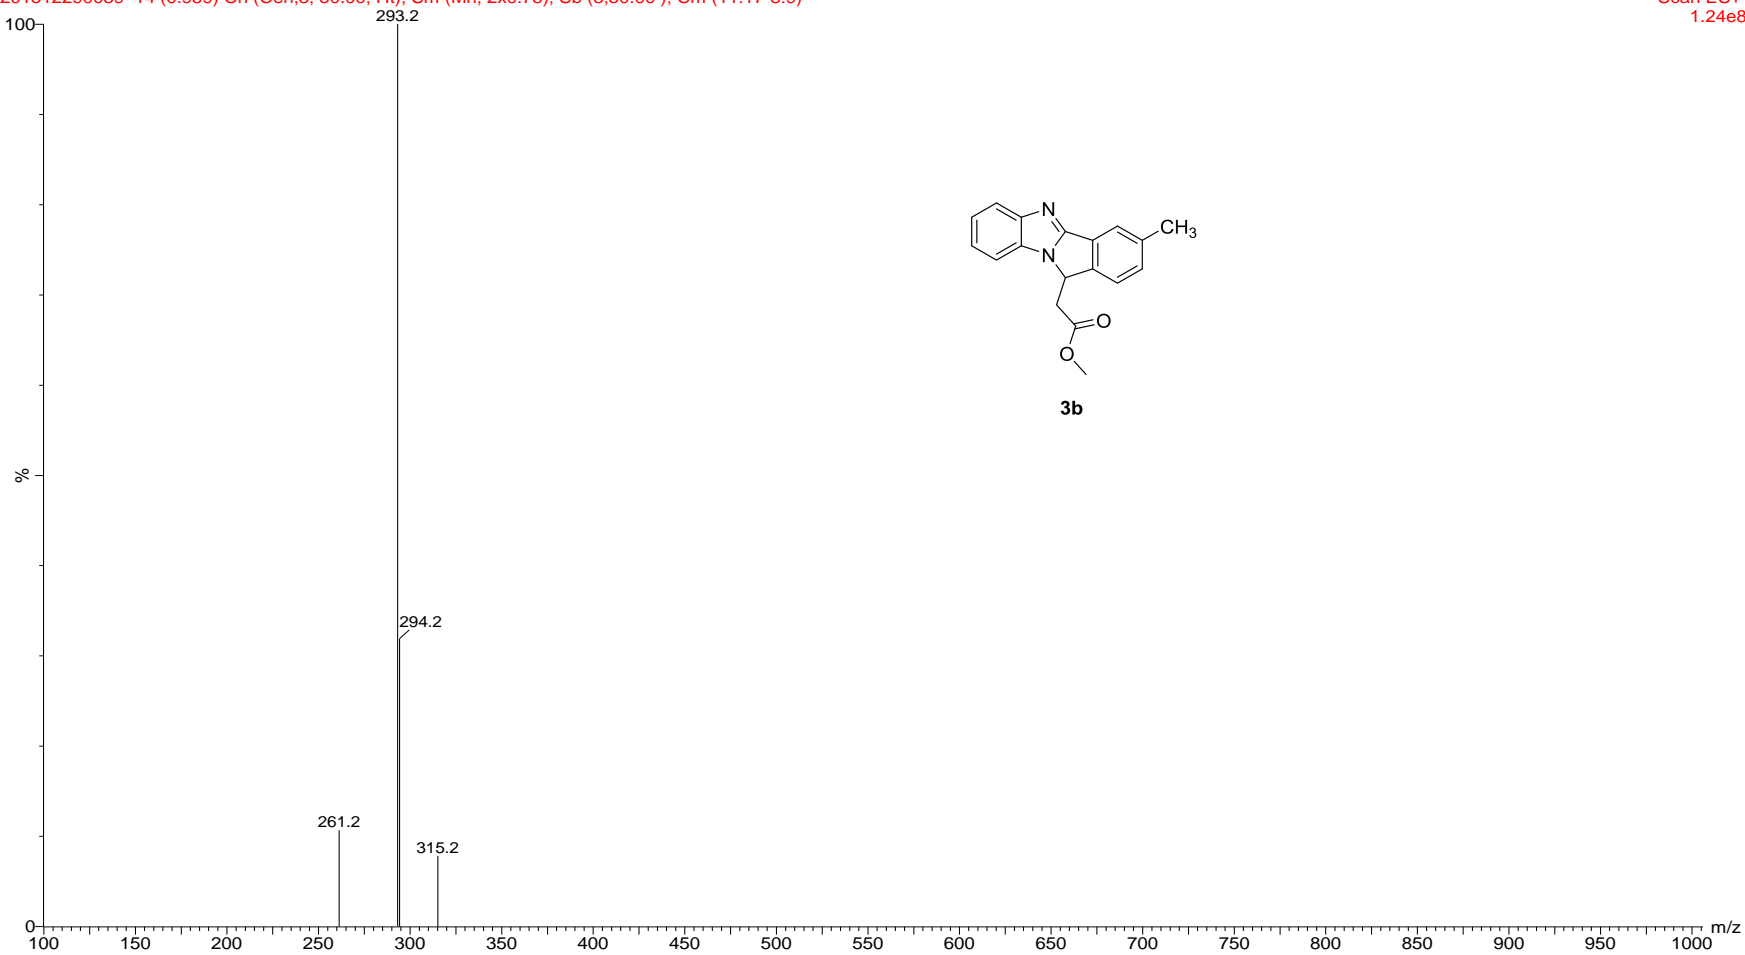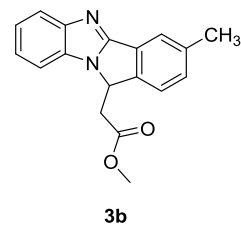

ESI<sup>+</sup> Mass spectrum of compound **3b**



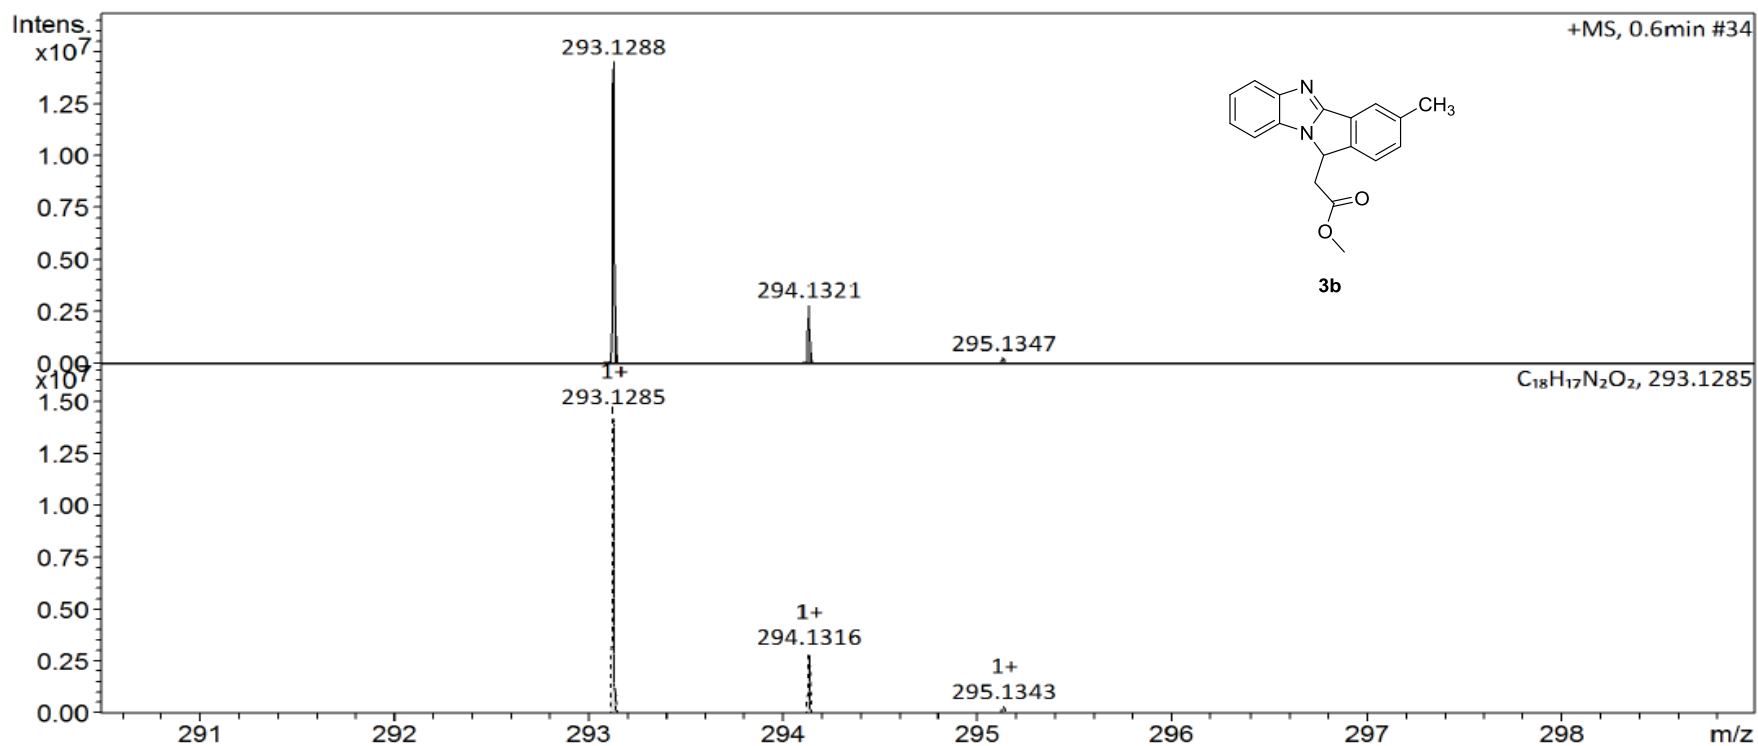

| Meas. m/z | # | Ion Formula                                                   | m/z      | err [ppm] | mSigma | # Sigma | Score  | rdb  | e <sup>-</sup> Conf | N-Rule | Adduct |
|-----------|---|---------------------------------------------------------------|----------|-----------|--------|---------|--------|------|---------------------|--------|--------|
| 293.1288  | 1 | C <sub>18</sub> H <sub>17</sub> N <sub>2</sub> O <sub>2</sub> | 293.1285 | 1.0       | 6.5    | 1       | 100.00 | 11.5 | even                | ok     | M+H    |

High resolution mass (ESI)<sup>+</sup> spectrum of compound of **3b**

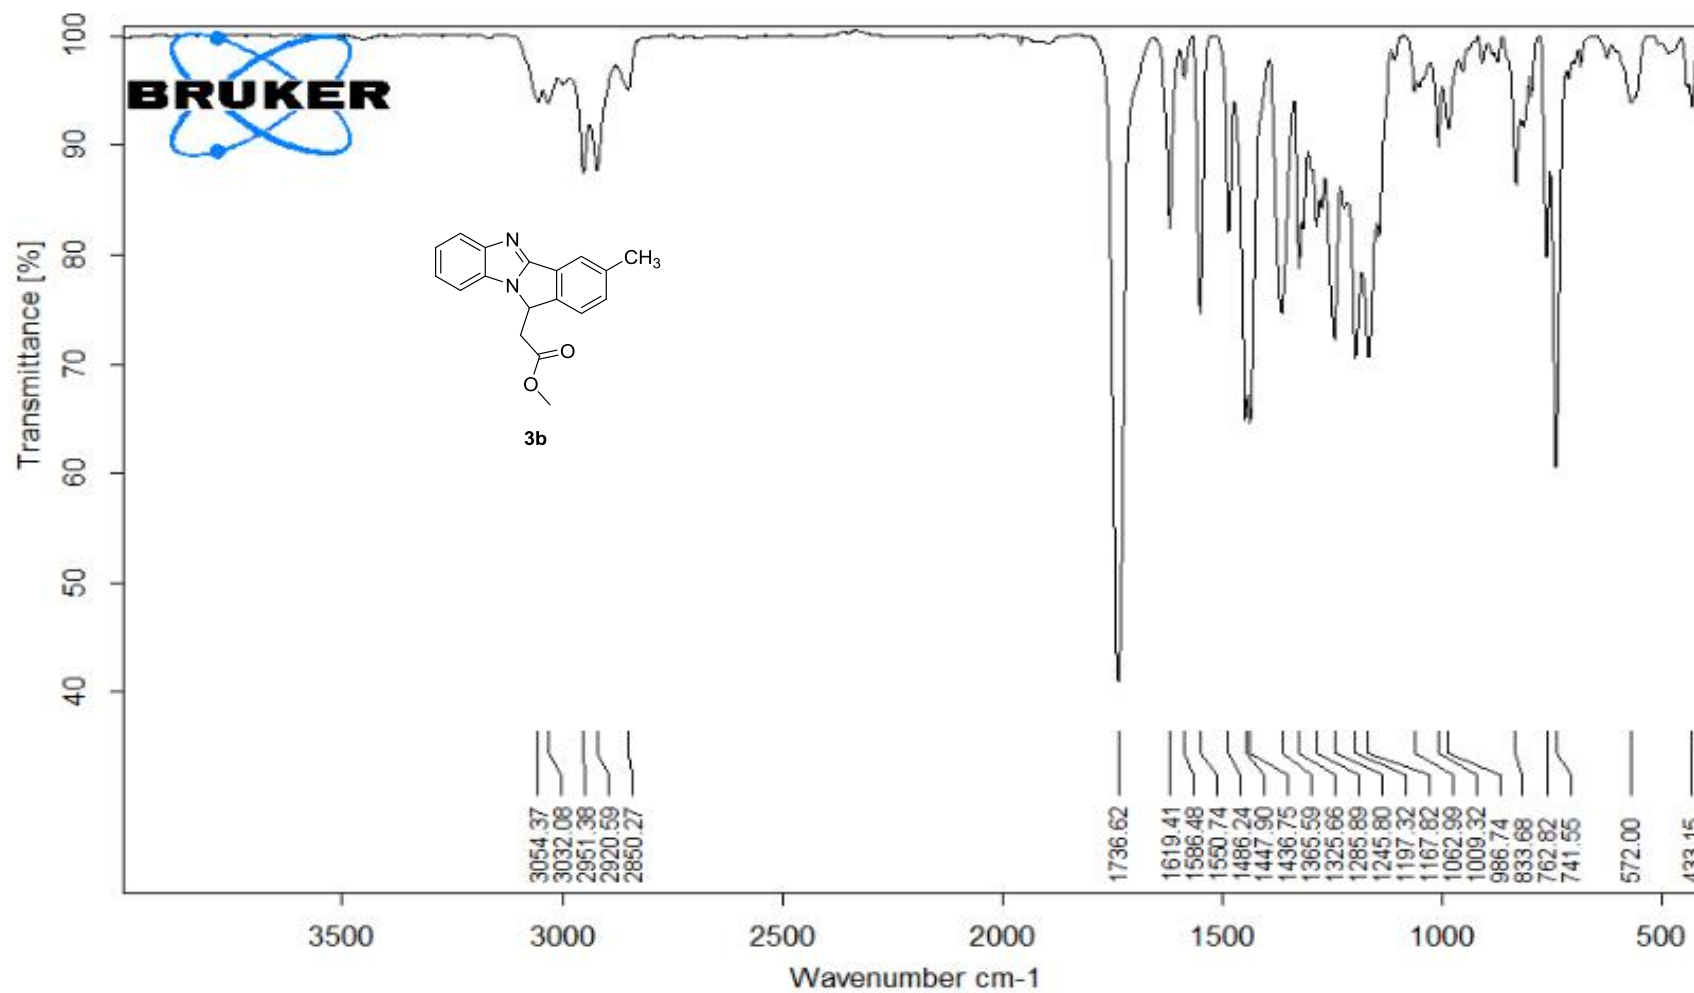

IR spectrum of compound of **3b**

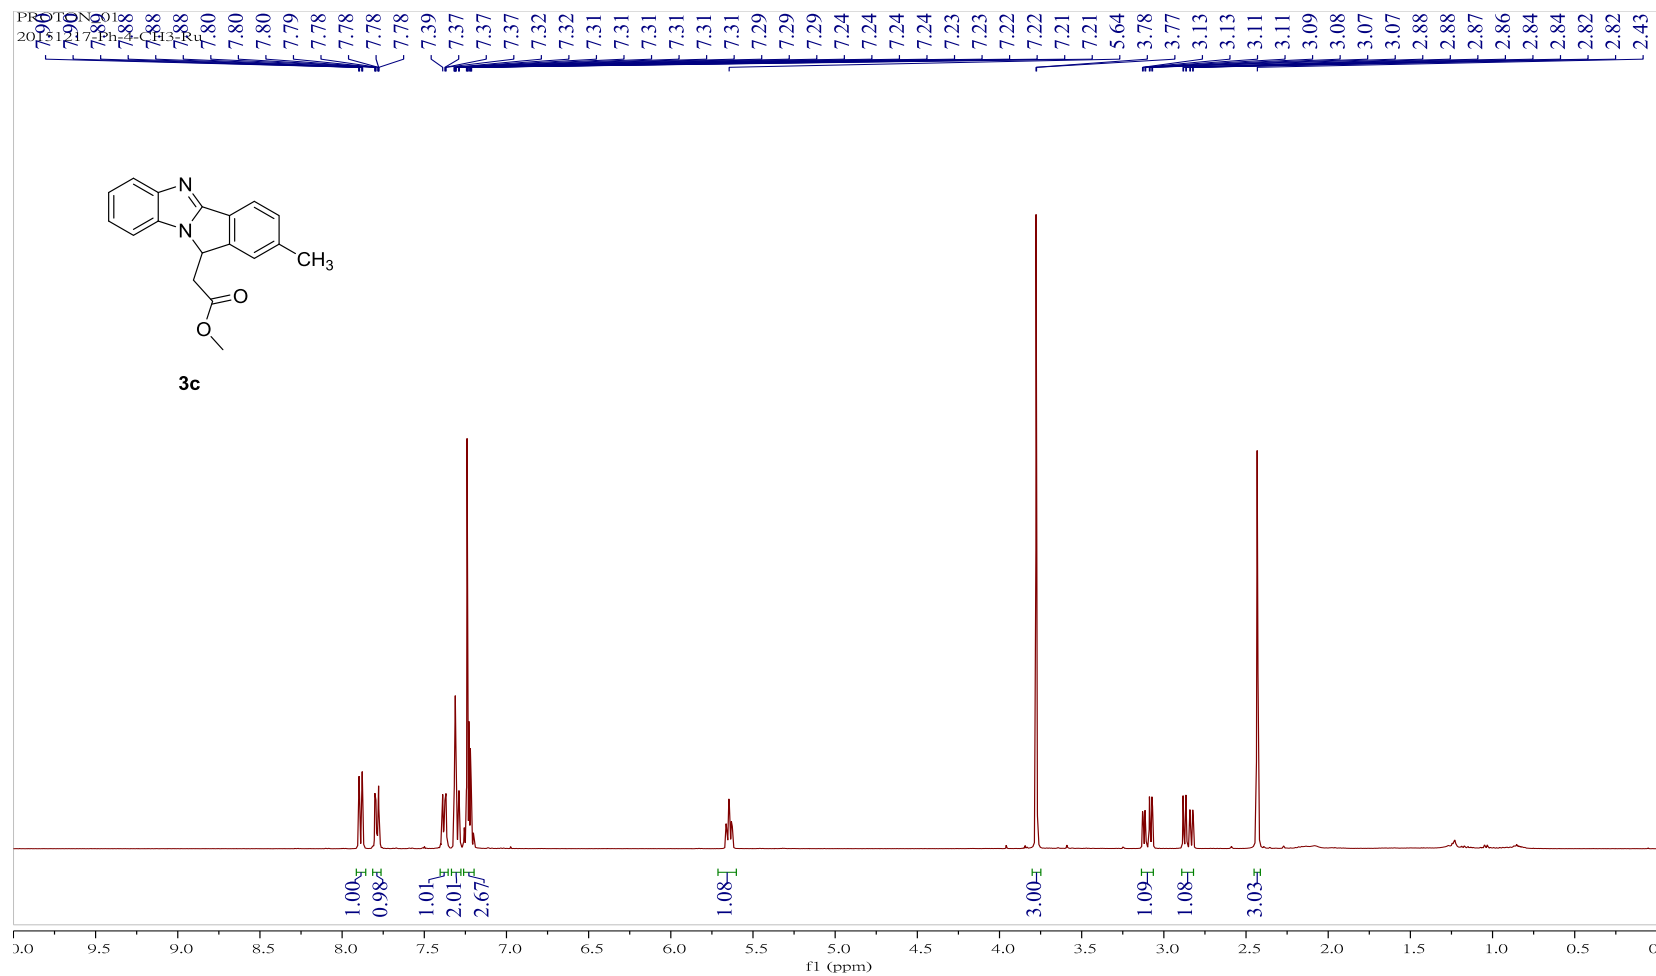

<sup>1</sup>H NMR Spectrum (400 MHz) of compound **3c** in CDCl<sub>3</sub>

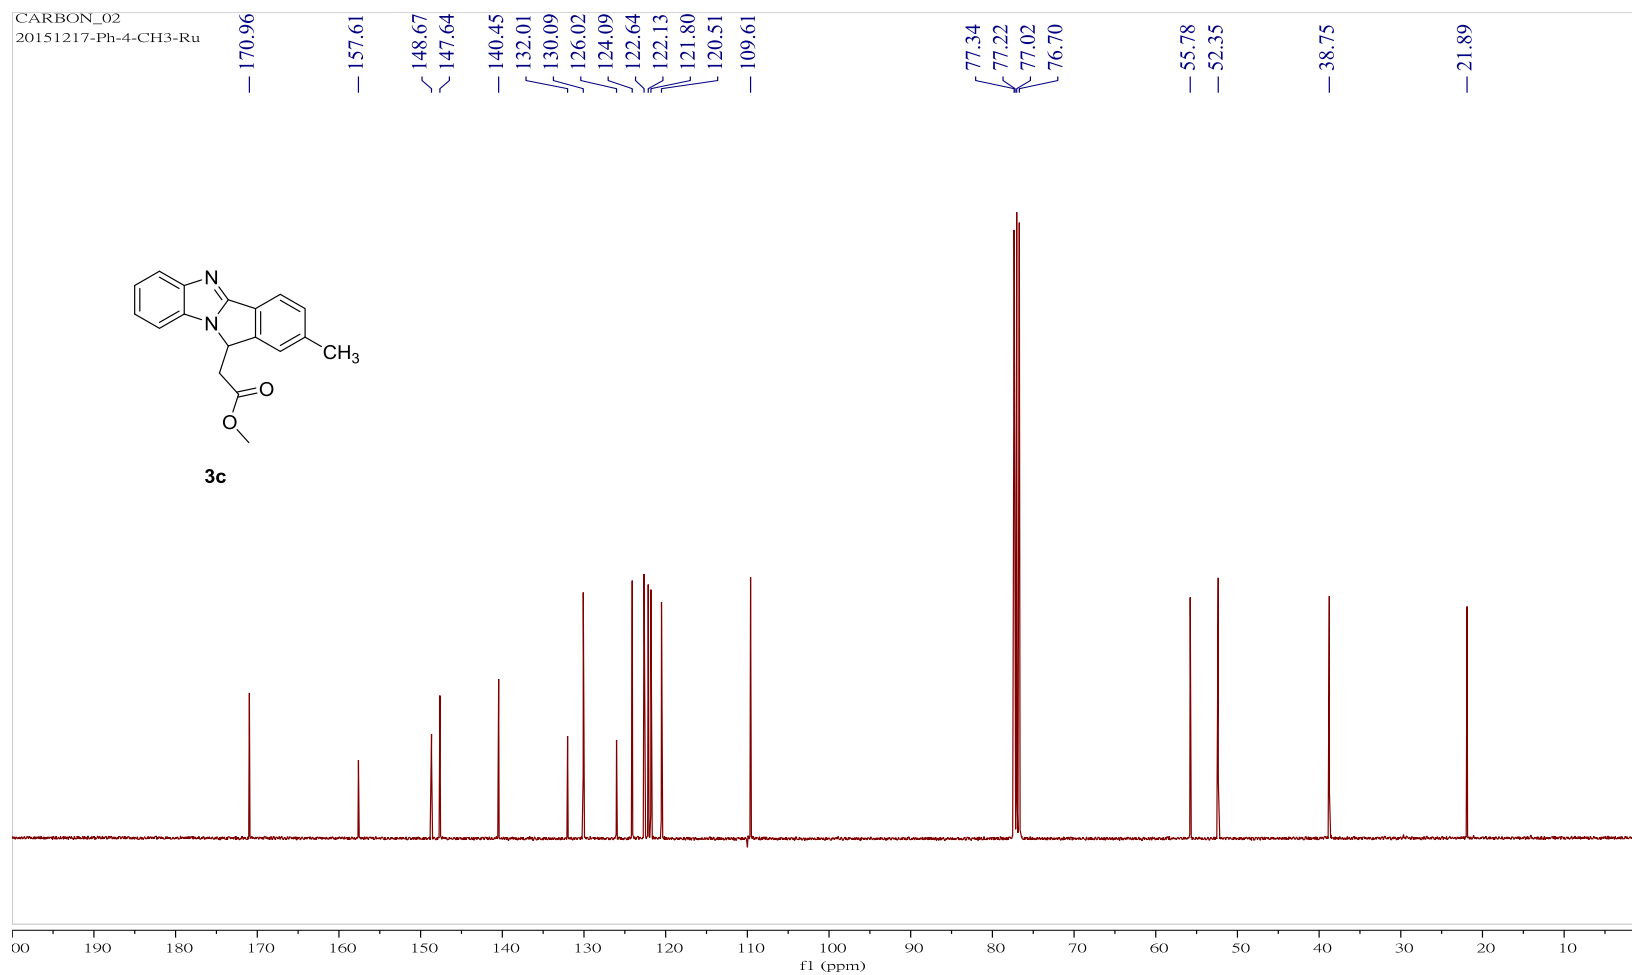

$^{13}\text{C}$  NMR Spectrum (100 MHz) of compound **3c**CDCl<sub>3</sub>

4-CH3-Ru

201512180021 16 (1.096) Cn (Cen,3, 50.00, Ht); Sm (Mn, 2x0.75); Sb (3,50.00 ); Cm (15:20-2:9)

Scan ES+  
1.06e8

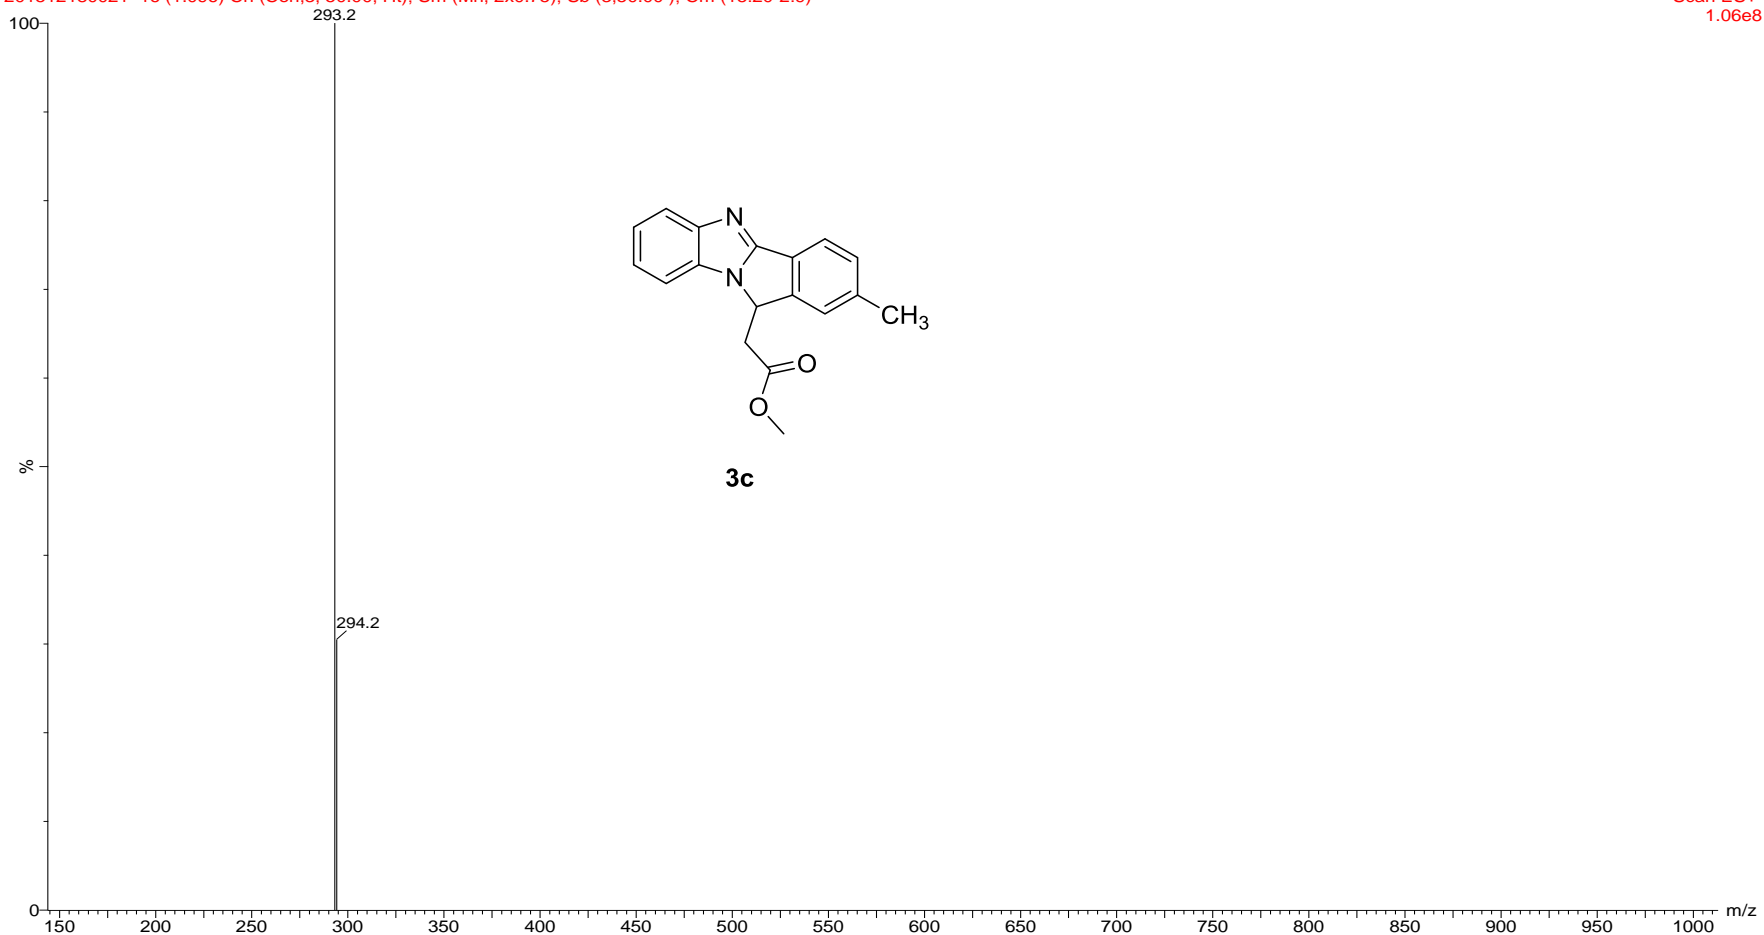

ESI<sup>+</sup> Mass spectrum of compound **3c**

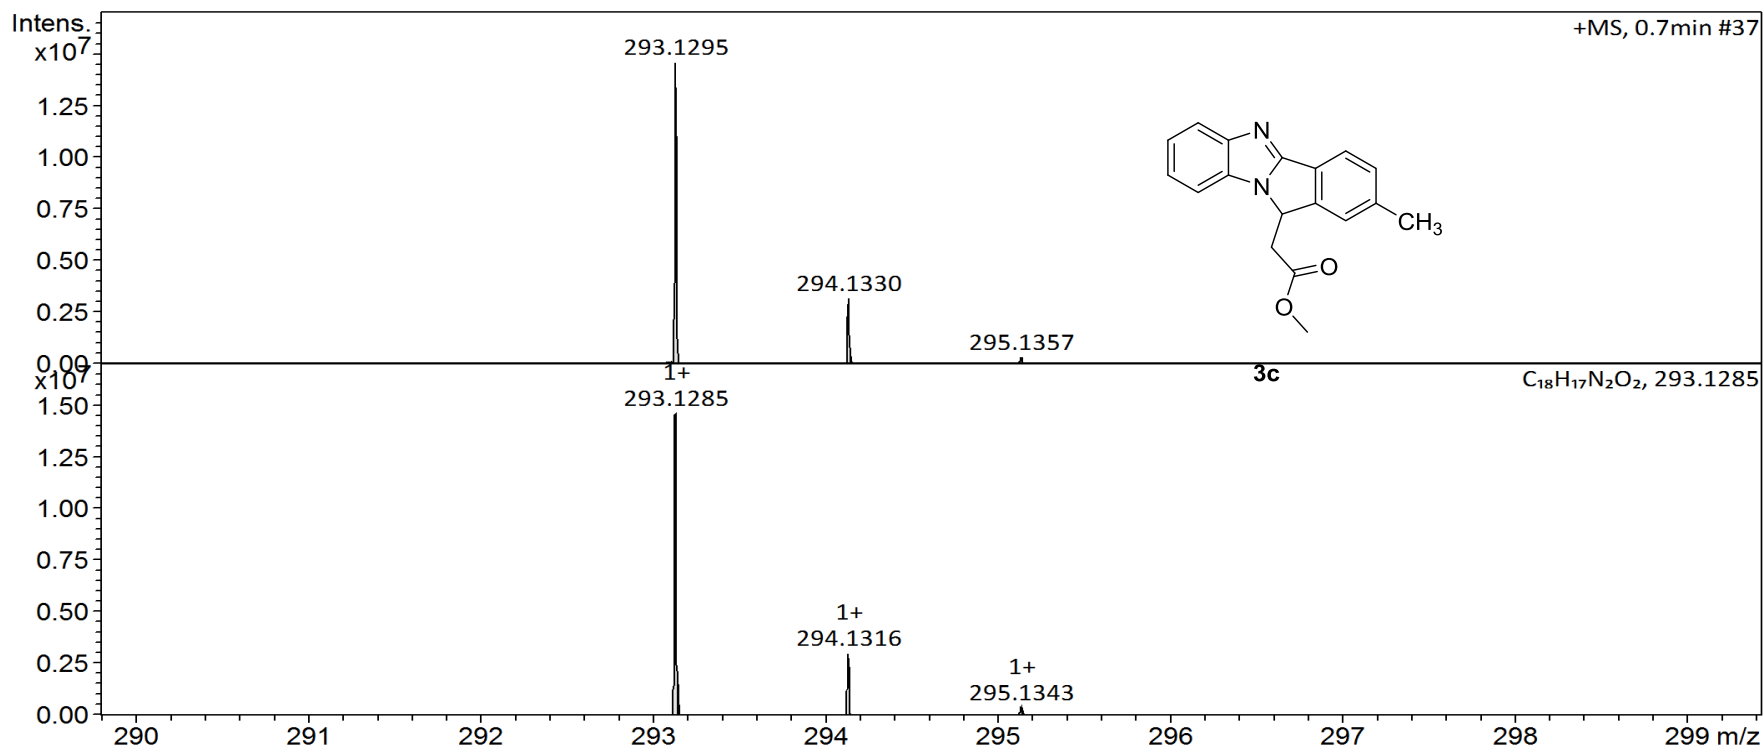

| Meas. m/z | # | Ion Formula                                                   | m/z      | err [ppm] | mSigma | # Sigma | Score  | rdb  | e <sup>-</sup> Conf | N-Rule | Adduct |
|-----------|---|---------------------------------------------------------------|----------|-----------|--------|---------|--------|------|---------------------|--------|--------|
| 293.1295  | 1 | C <sub>18</sub> H <sub>17</sub> N <sub>2</sub> O <sub>2</sub> | 293.1285 | 3.6       | 6.8    | 1       | 100.00 | 11.5 | even                | ok     | M+H    |

High resolution mass (ESI)<sup>+</sup> spectrum of compound of **3c**

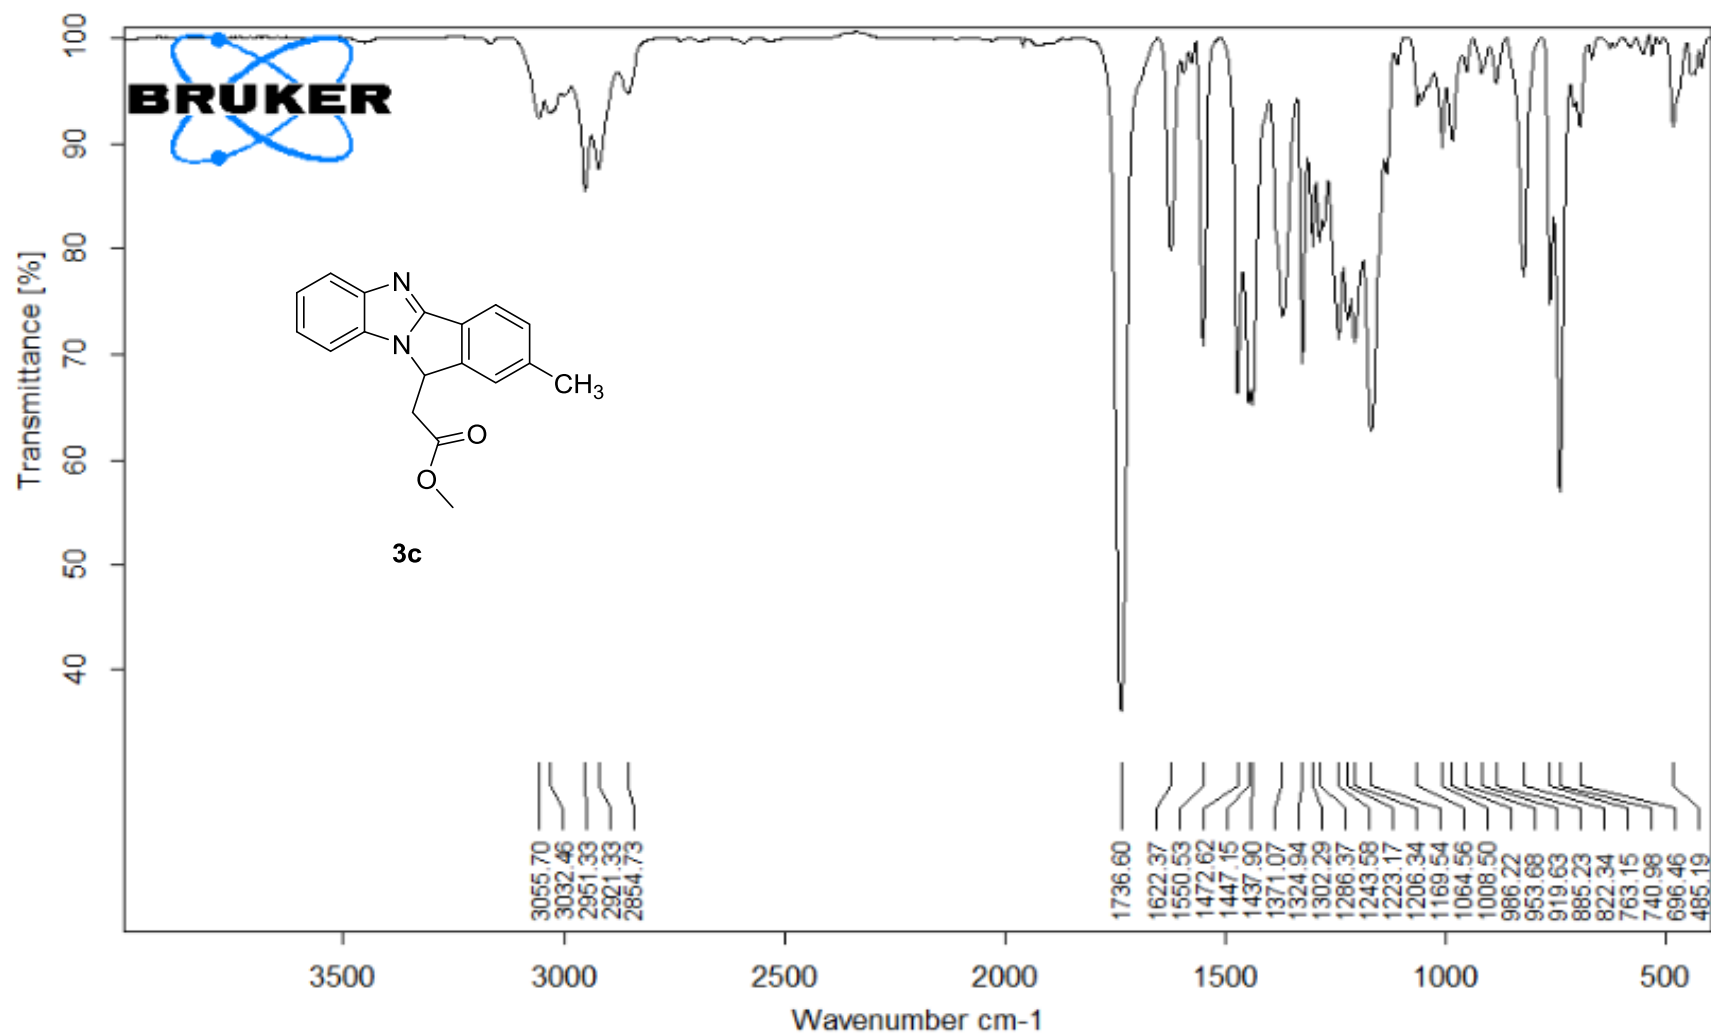

IR spectrum of compound of **3c**

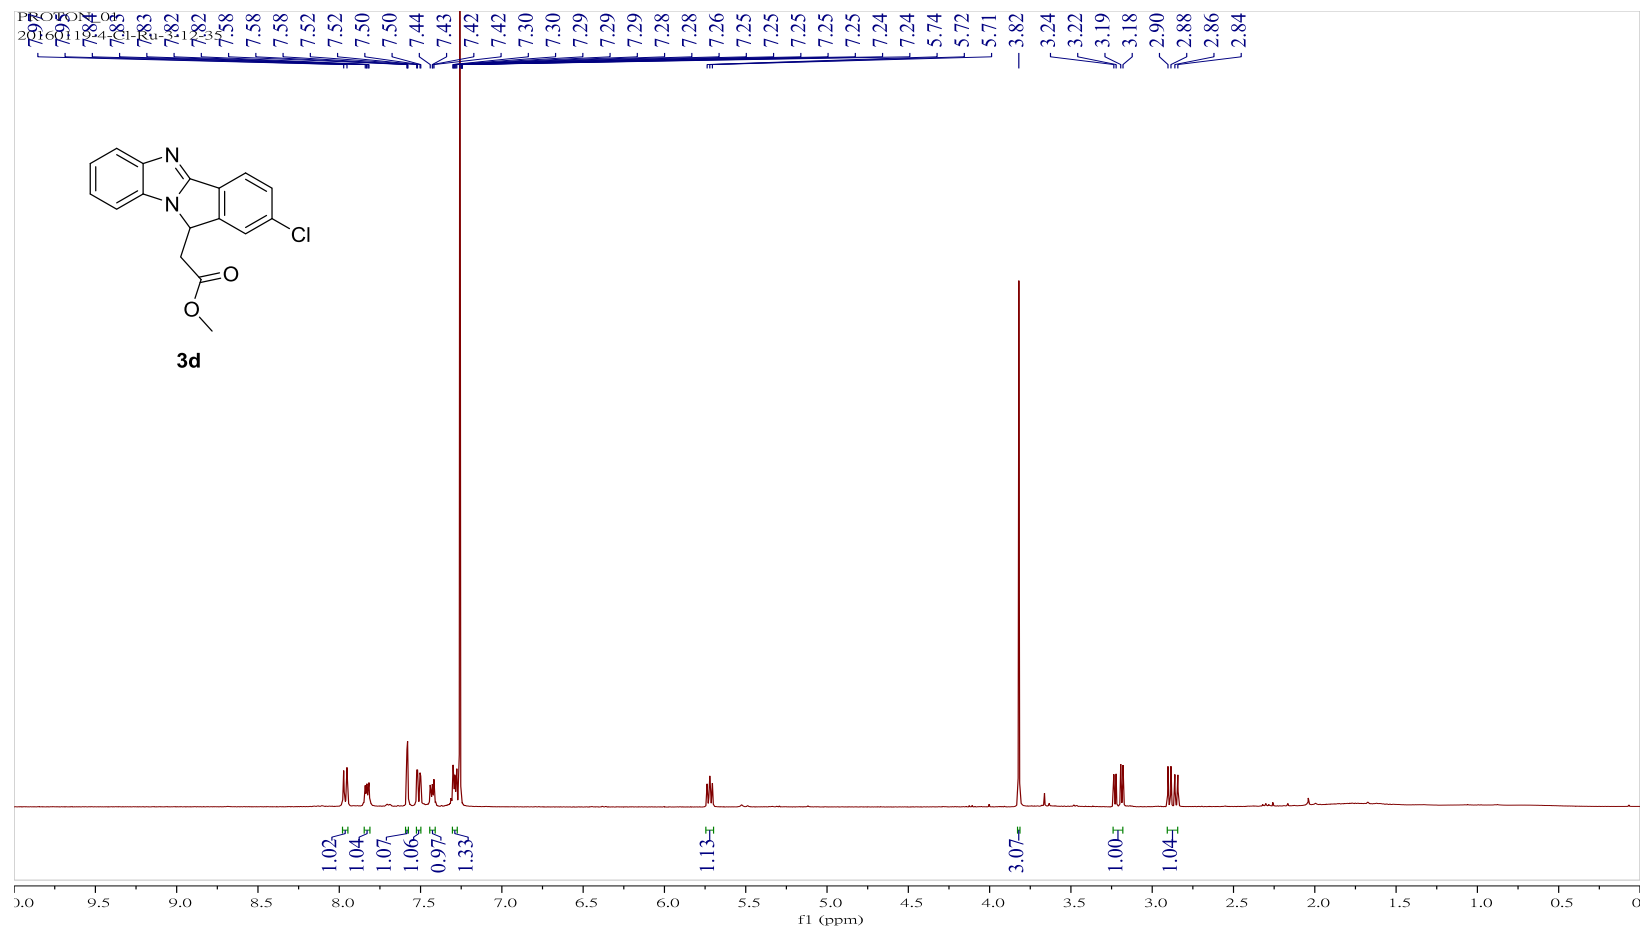

$^1\text{H}$  NMR Spectrum (400 MHz) of compound **3d** in  $\text{CDCl}_3$



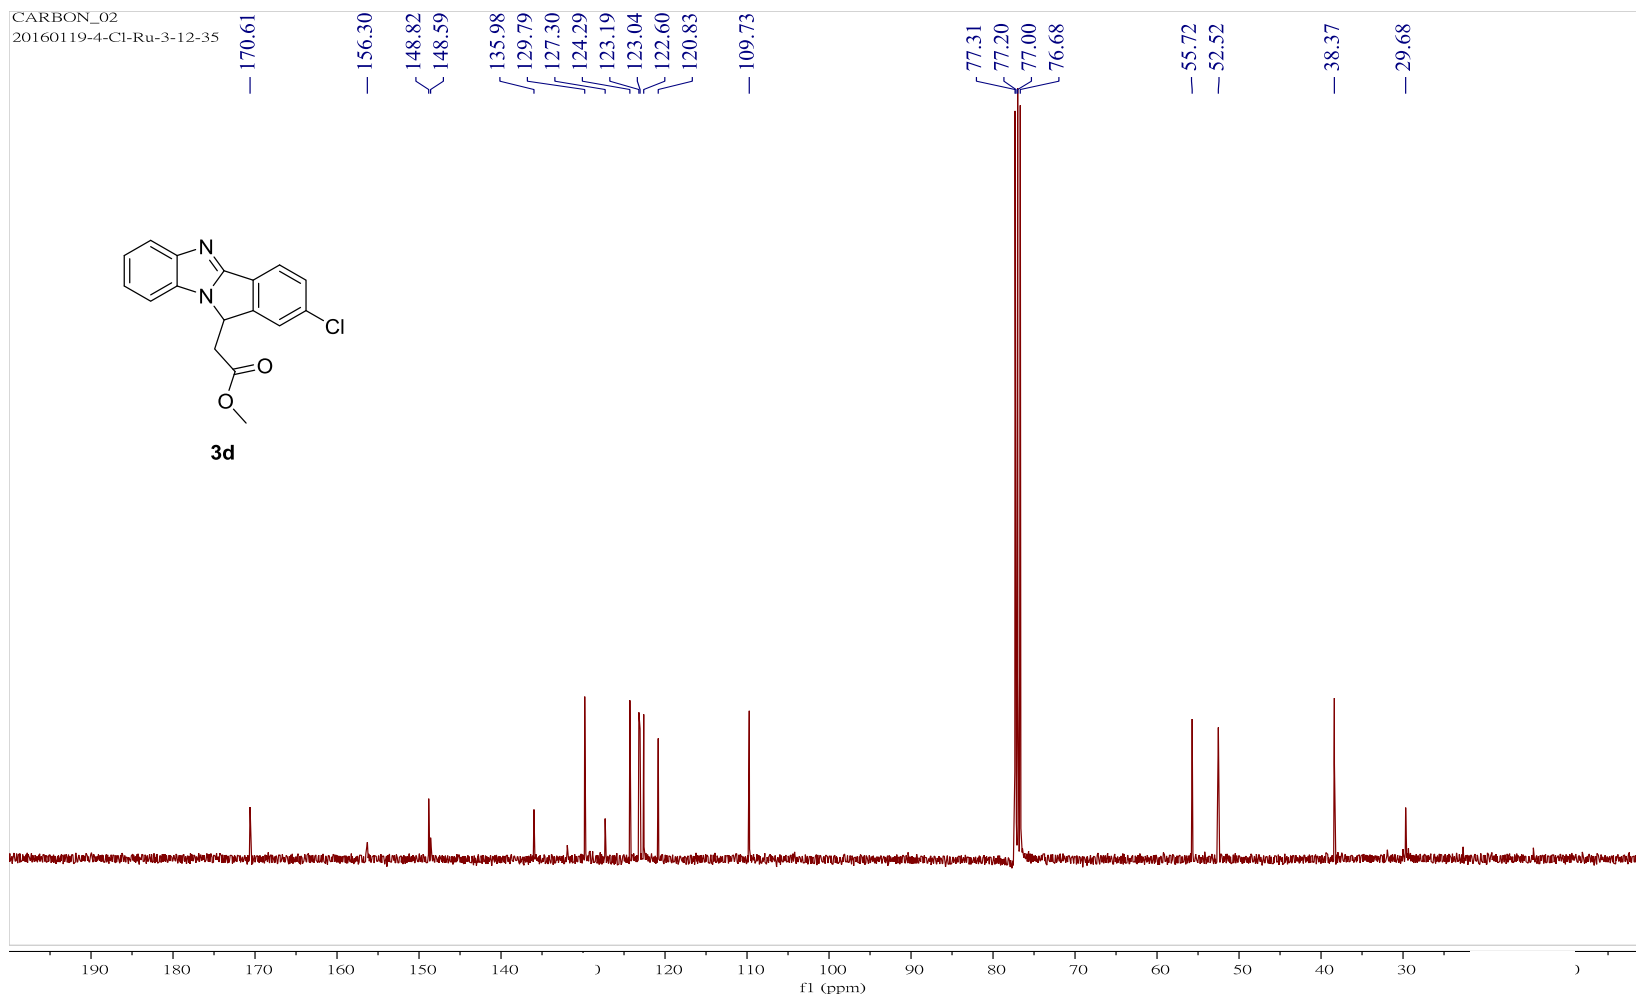

$^{13}\text{C}$  NMR Spectrum (100 MHz) of compound **3d**  $\text{CDCl}_3$

**4-Cl-Ru**

201601220047 48 (3.288) Cn (Cen,3, 80.00, Ht); Sm (Mn, 2x0.75); Sb (3,50.00 ); Cm (48:52-22:42)

Scan ES+  
7.47e7

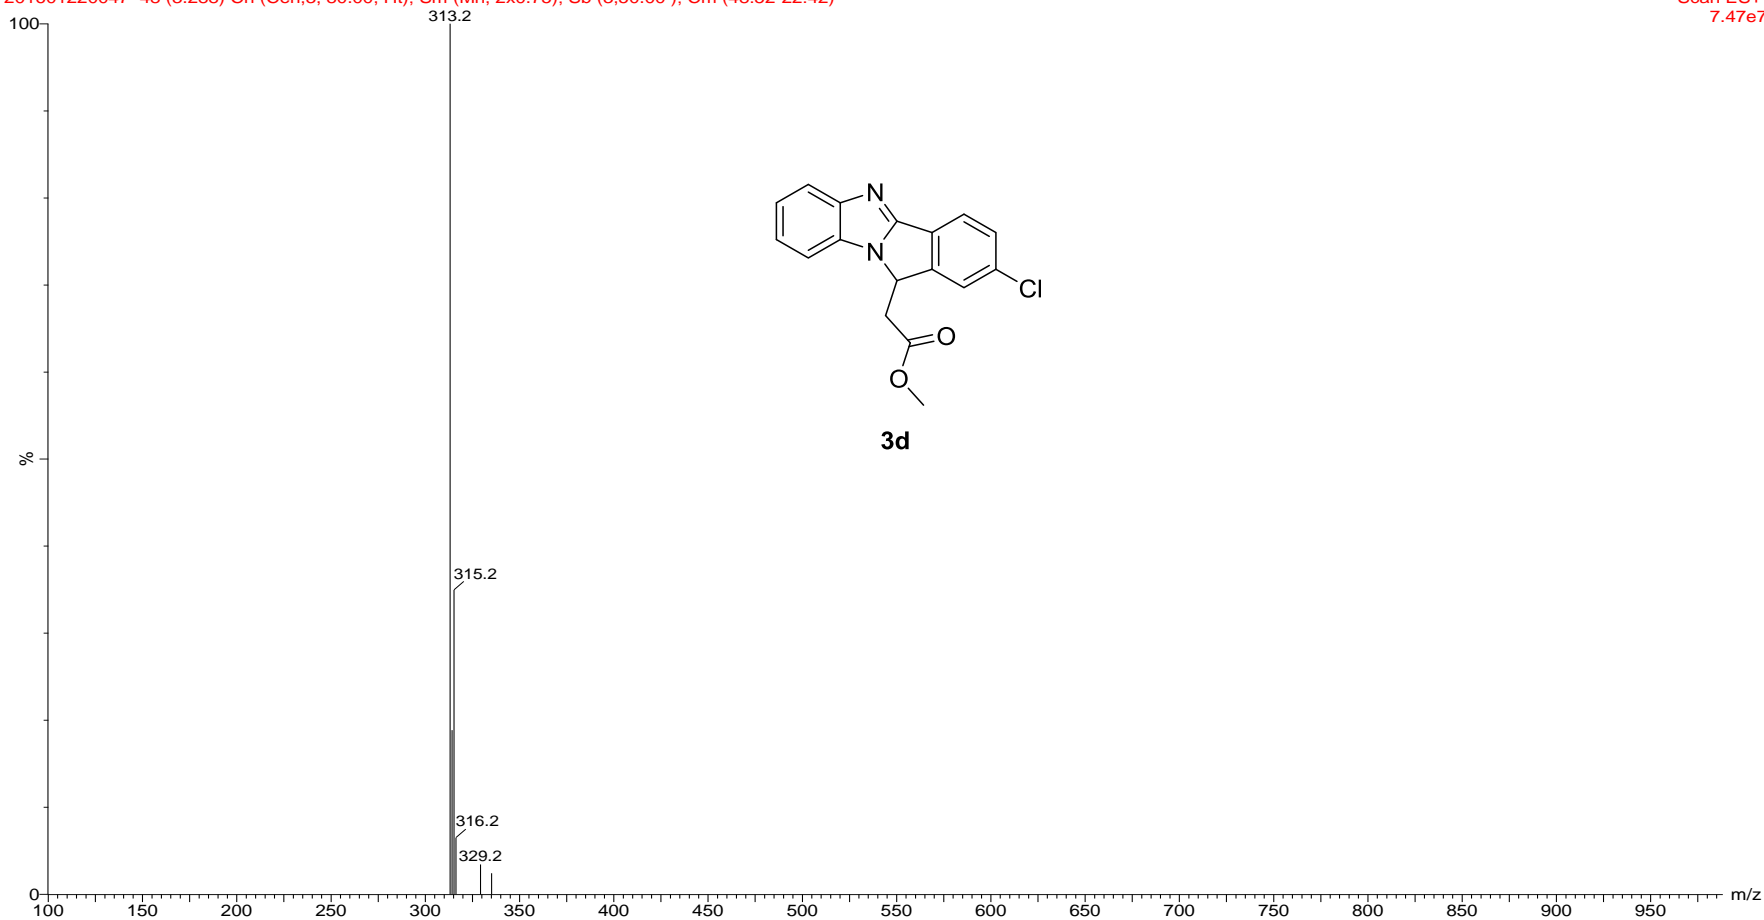

ESI<sup>+</sup> Mass spectrum of compound **3d**

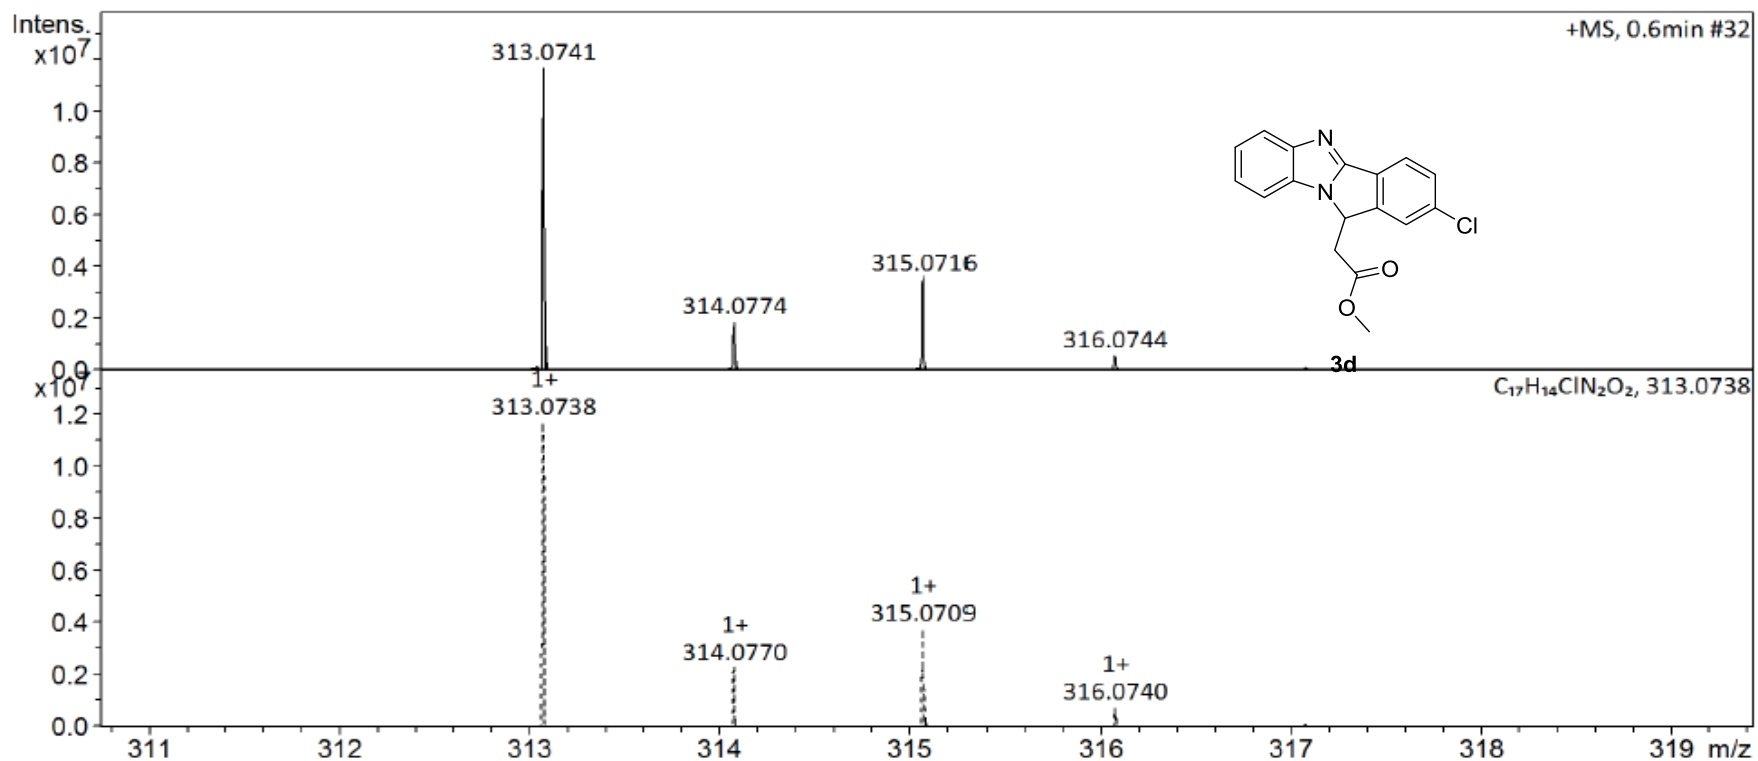

| Meas. m/z | # | Ion Formula                                                     | m/z      | err [ppm] | mSigma | # Sigma | Score  | rdb  | e <sup>-</sup> Conf | N-Rule | Adduct |
|-----------|---|-----------------------------------------------------------------|----------|-----------|--------|---------|--------|------|---------------------|--------|--------|
| 313.0741  | 1 | C <sub>17</sub> H <sub>14</sub> ClN <sub>2</sub> O <sub>2</sub> | 313.0738 | 0.7       | 23.5   | 1       | 100.00 | 11.5 | even                | ok     | M+H    |

High resolution mass (ESI)<sup>+</sup> spectrum of compound of **3d**

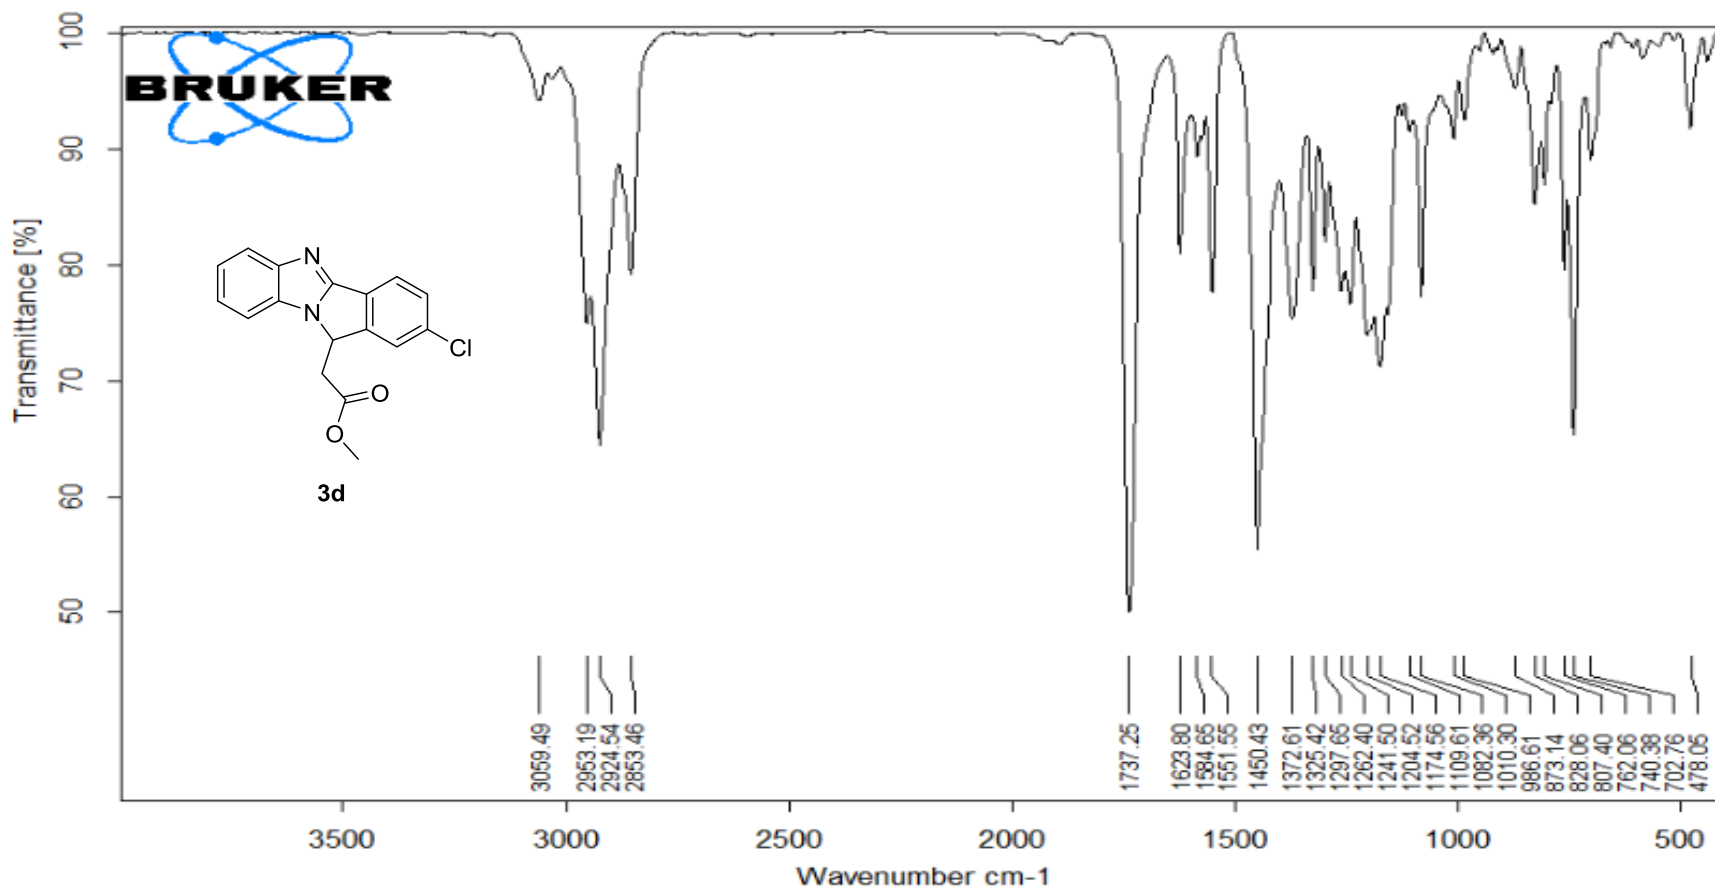

IR spectrum of compound of **3d**

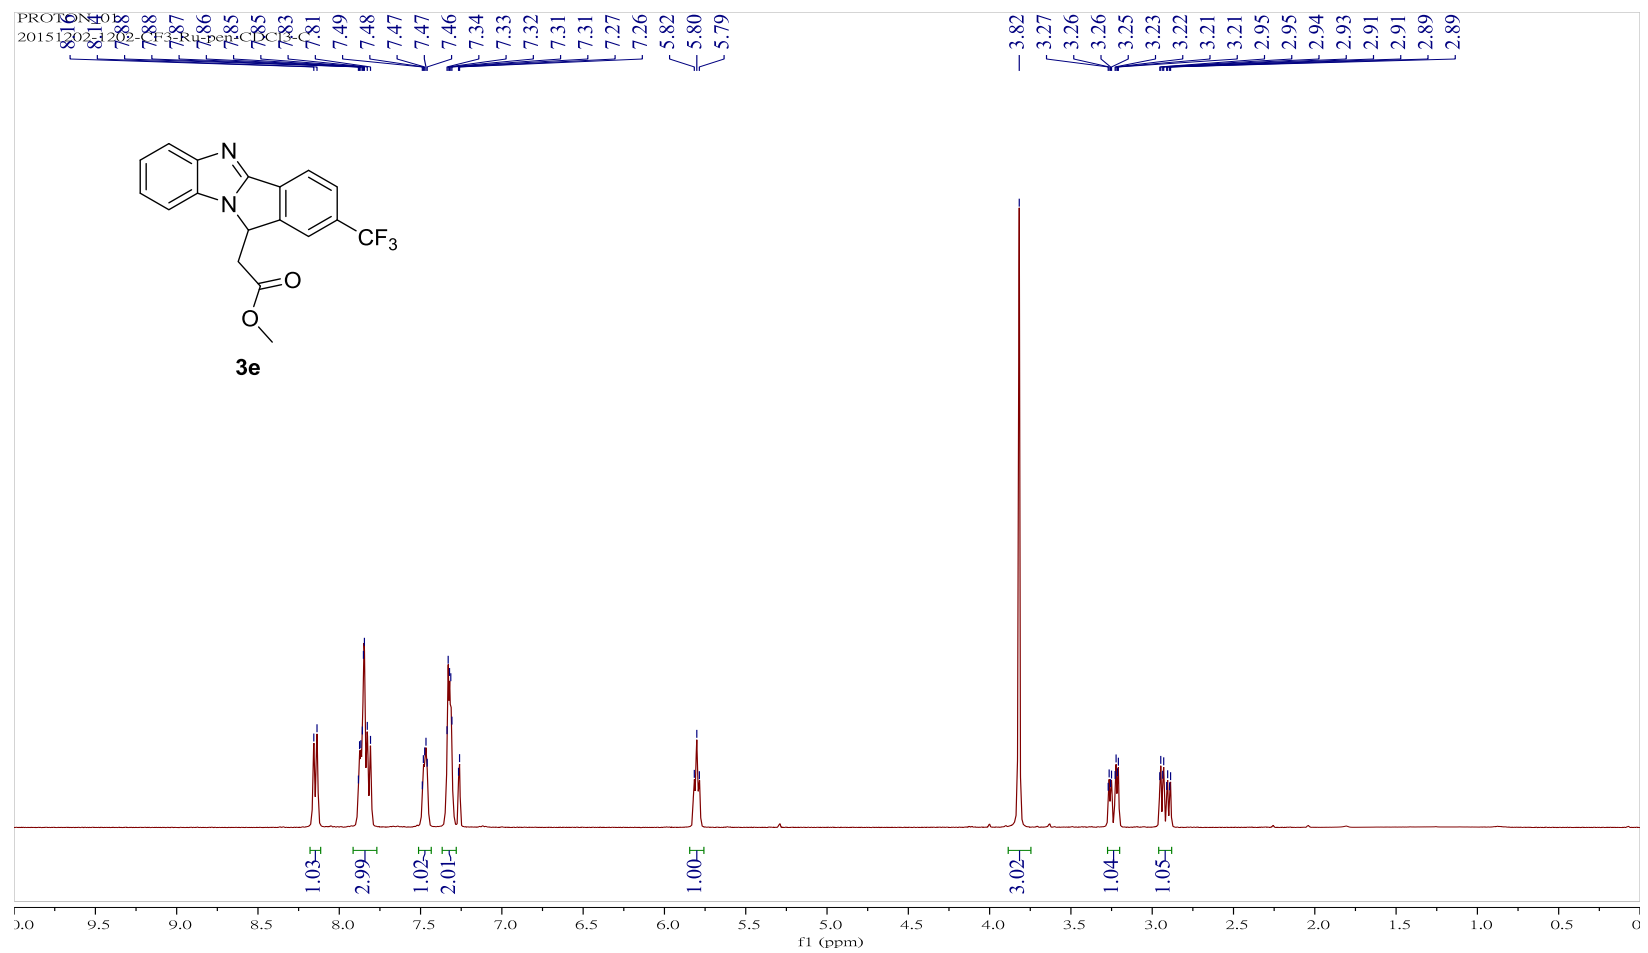

<sup>1</sup>H NMR Spectrum (400 MHz) of compound **3e** in CDCl<sub>3</sub>

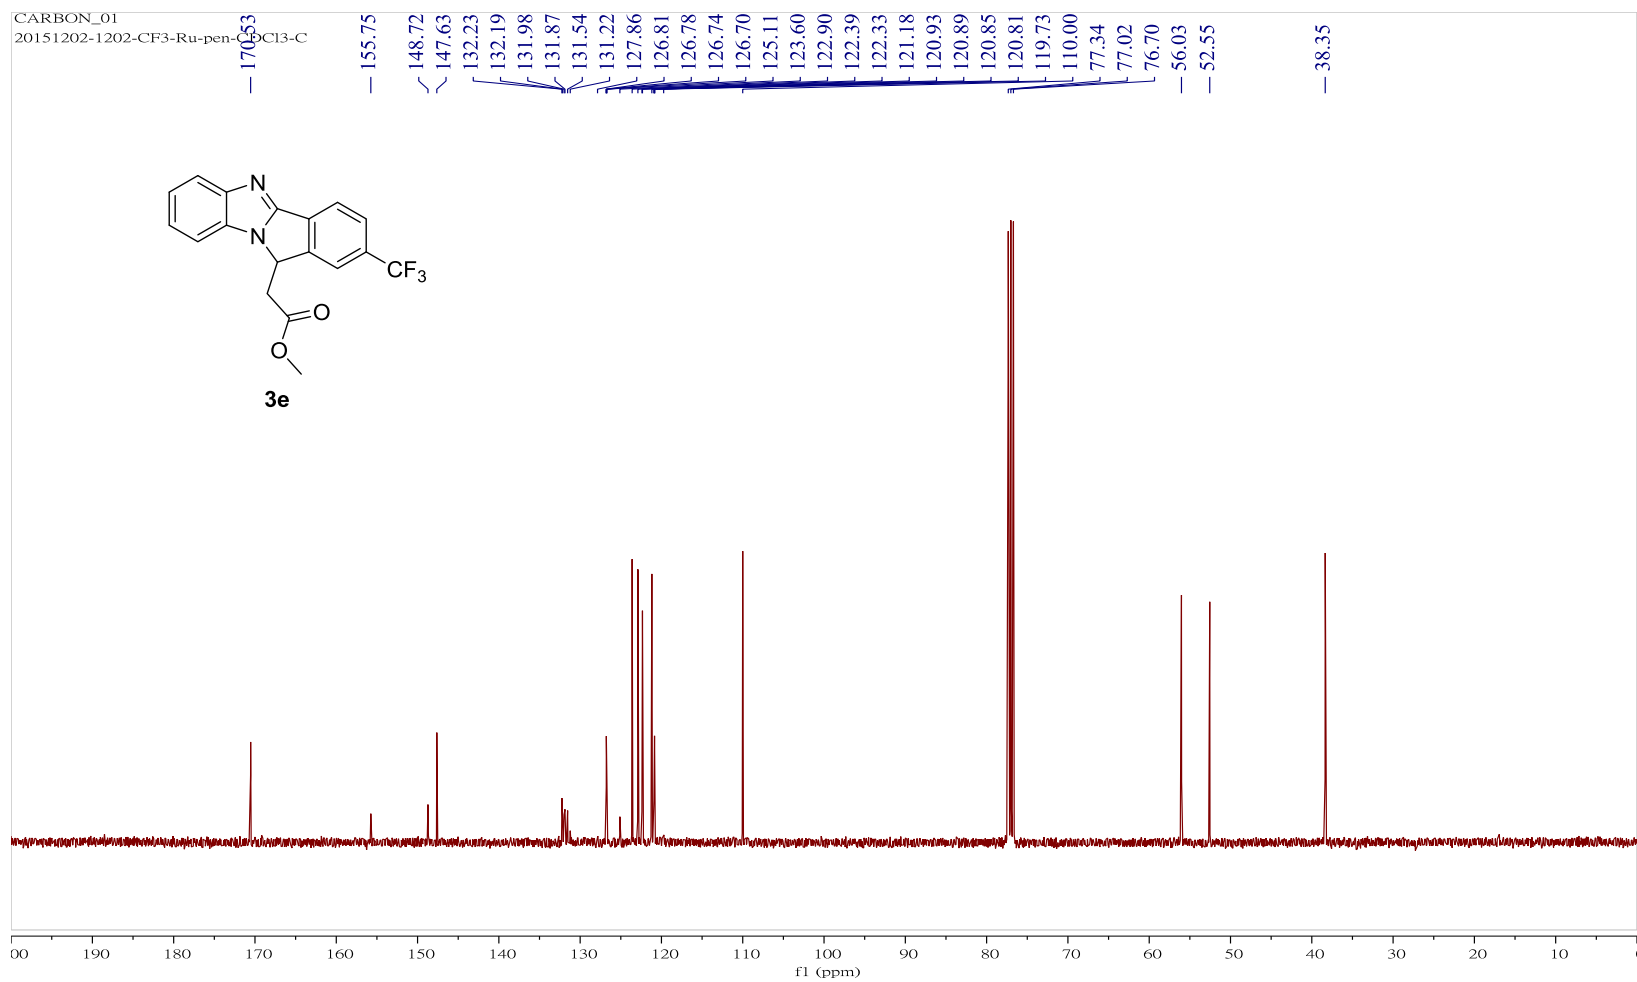

<sup>13</sup>C NMR Spectrum (100 MHz) of compound **3e** CDCl<sub>3</sub>

1109-CF3-Ru-6-8

201511130026 25 (1.712) Cn (Cen,3, 50.00, Ht); Sm (Mn, 2x0.75); Sb (3,50.00); Cm (25:30-2:9)

Scan ES+  
4.05e7

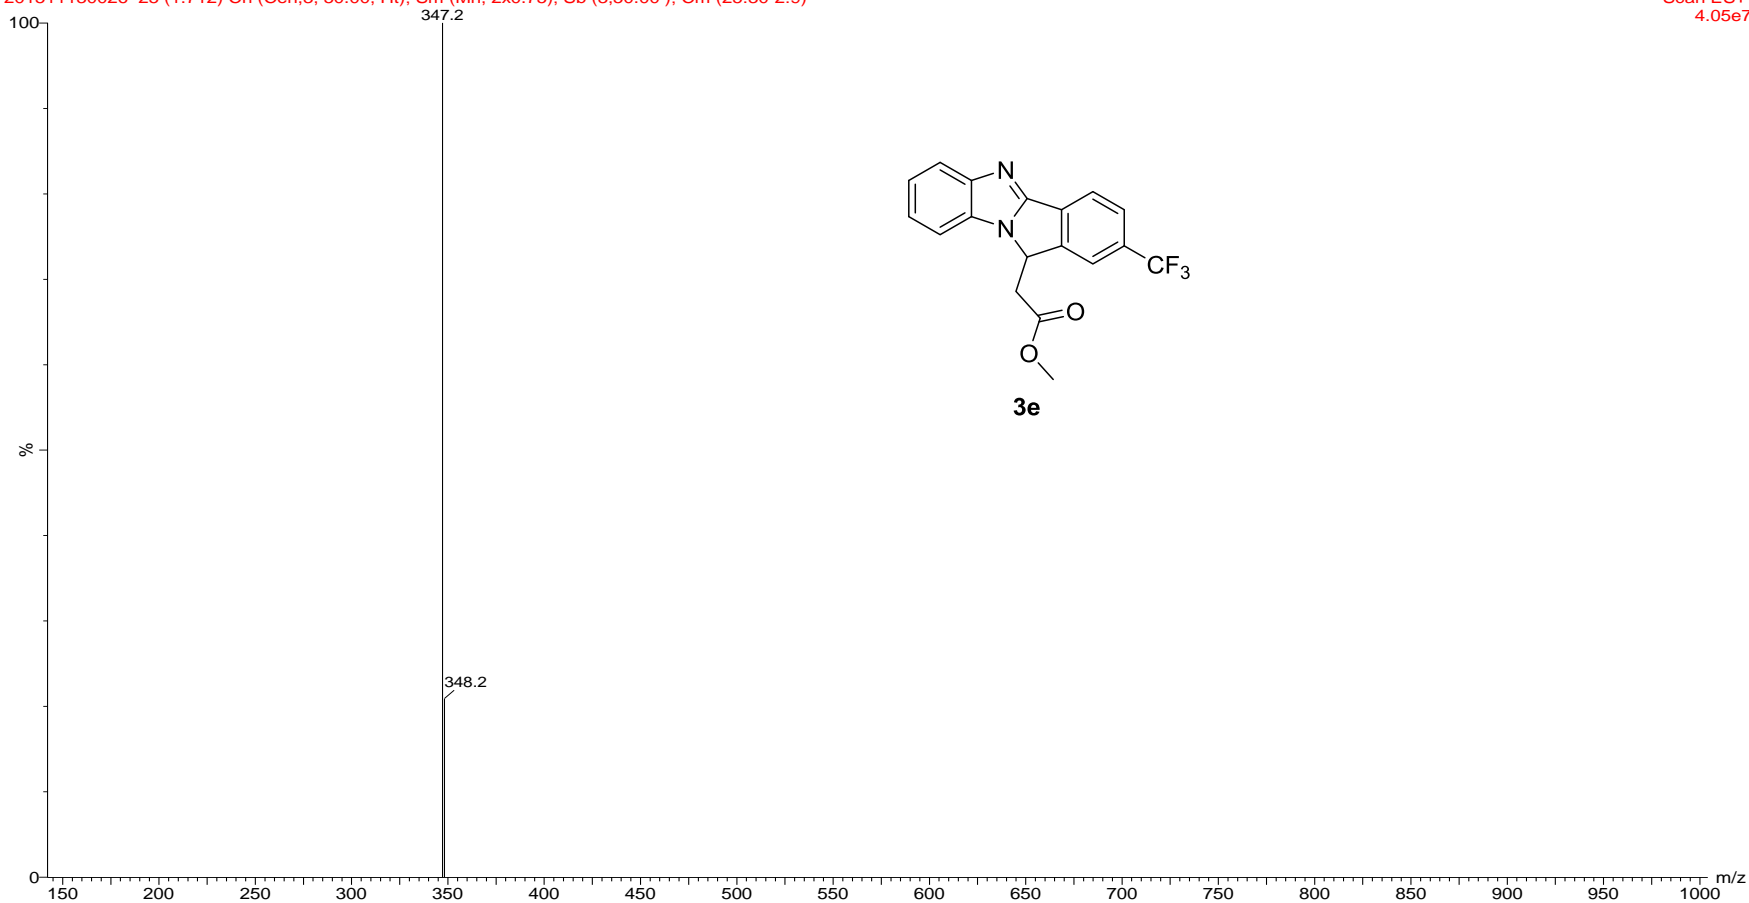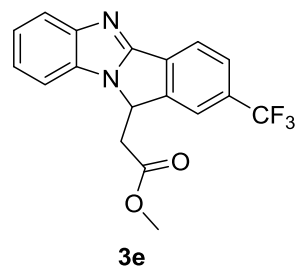

ESI<sup>+</sup> Mass spectrum of compound **3e**

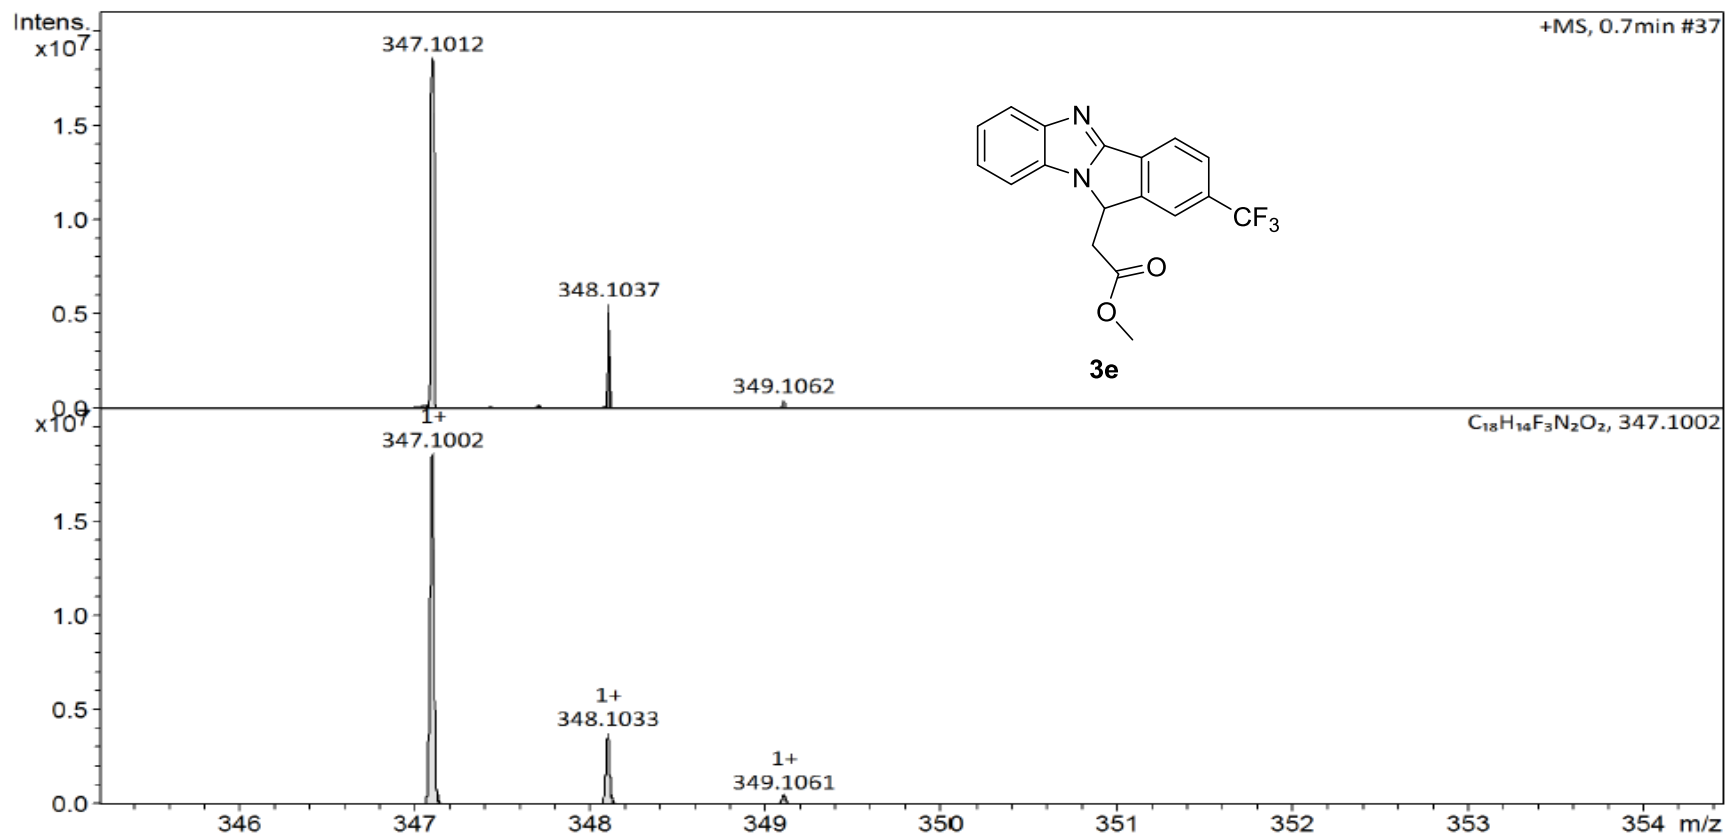

| Meas. m/z | # | Ion Formula                                                                  | m/z      | err [ppm] | mSigma | # Sigma | Score  | rdb  | e <sup>-</sup> Conf | N-Rule | Adduct |
|-----------|---|------------------------------------------------------------------------------|----------|-----------|--------|---------|--------|------|---------------------|--------|--------|
| 347.1012  | 1 | C <sub>18</sub> H <sub>14</sub> F <sub>3</sub> N <sub>2</sub> O <sub>2</sub> | 347.1002 | 2.9       | 54.6   | 1       | 100.00 | 11.5 | even                | ok     | M+H    |

High resolution mass (ESI)<sup>+</sup> spectrum of compound of **3e**



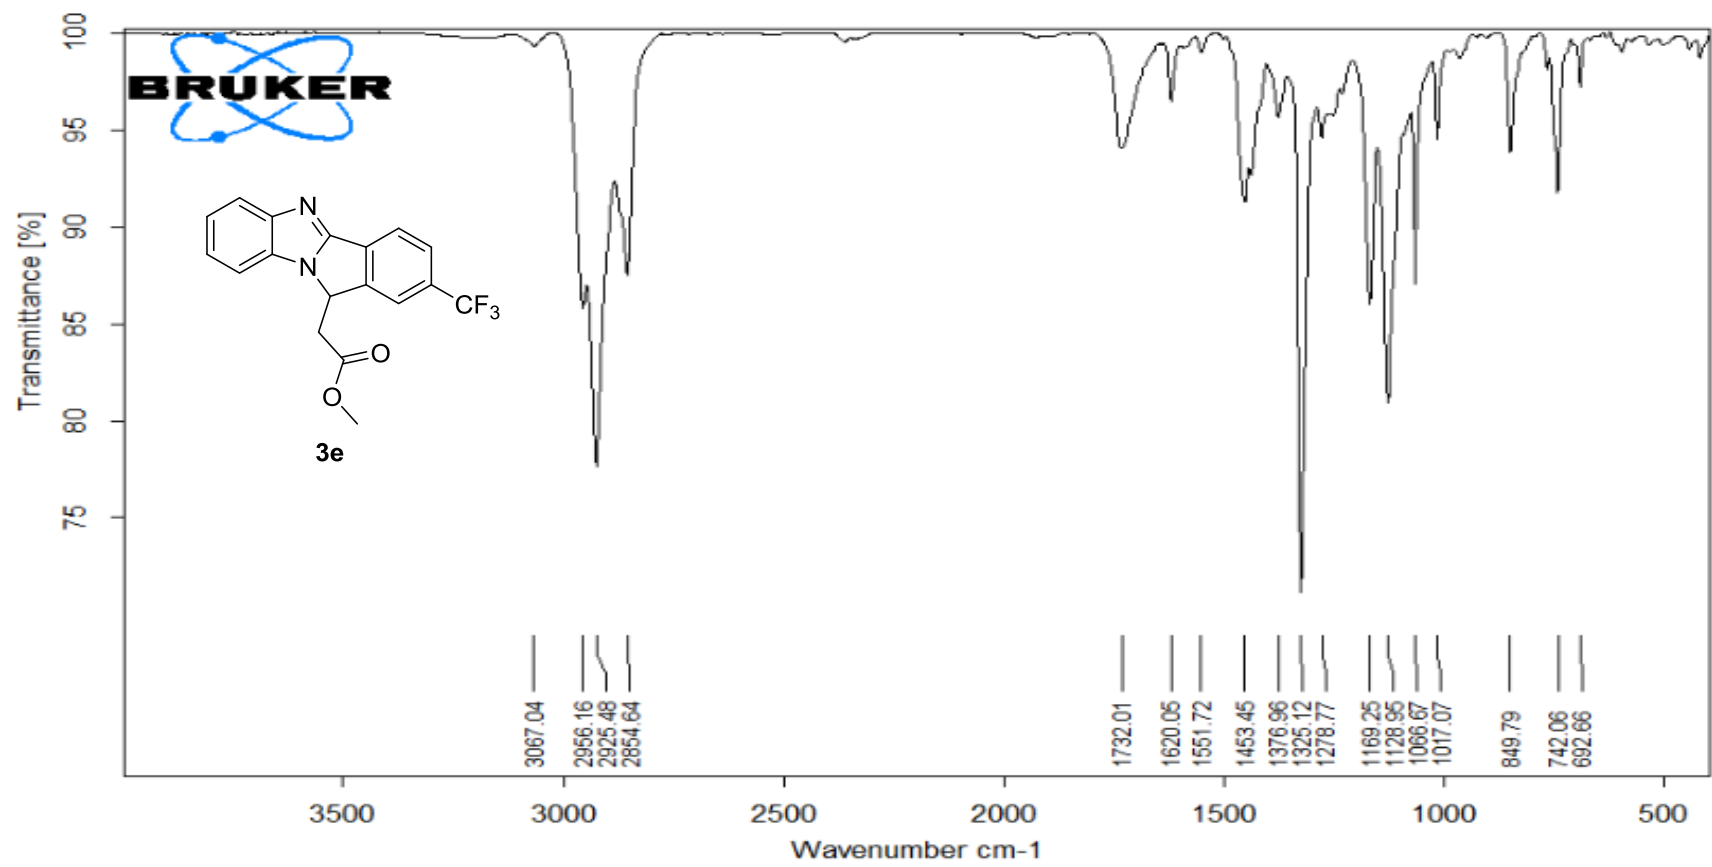

IR spectrum of compound of 3e

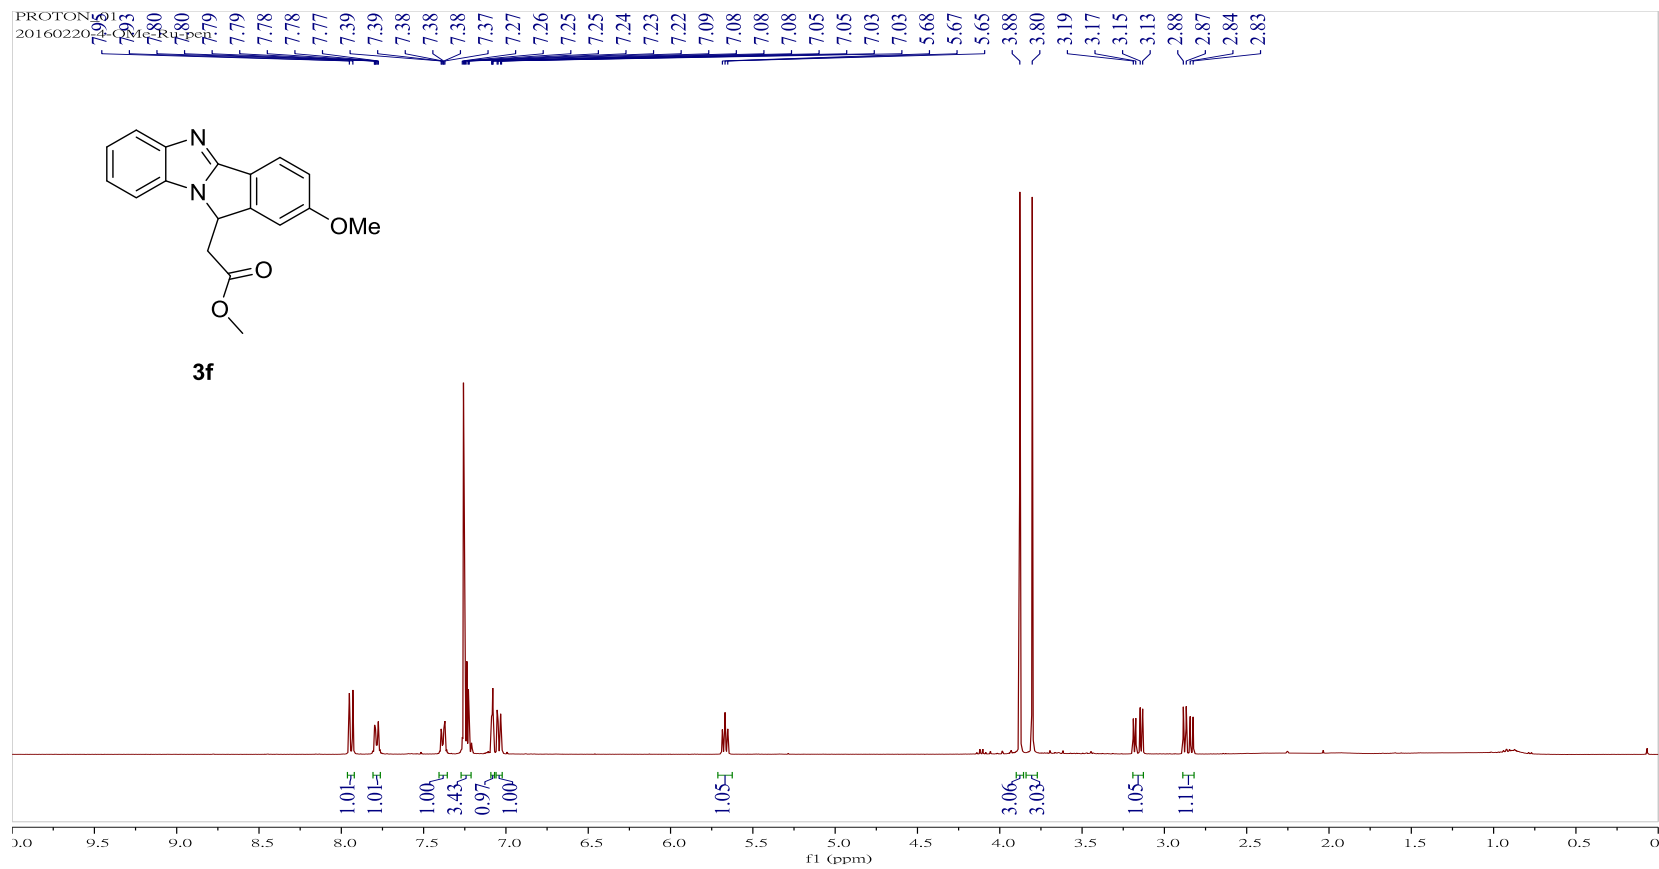

<sup>1</sup>H NMR Spectrum (400 MHz) of compound **3f** in CDCl<sub>3</sub>

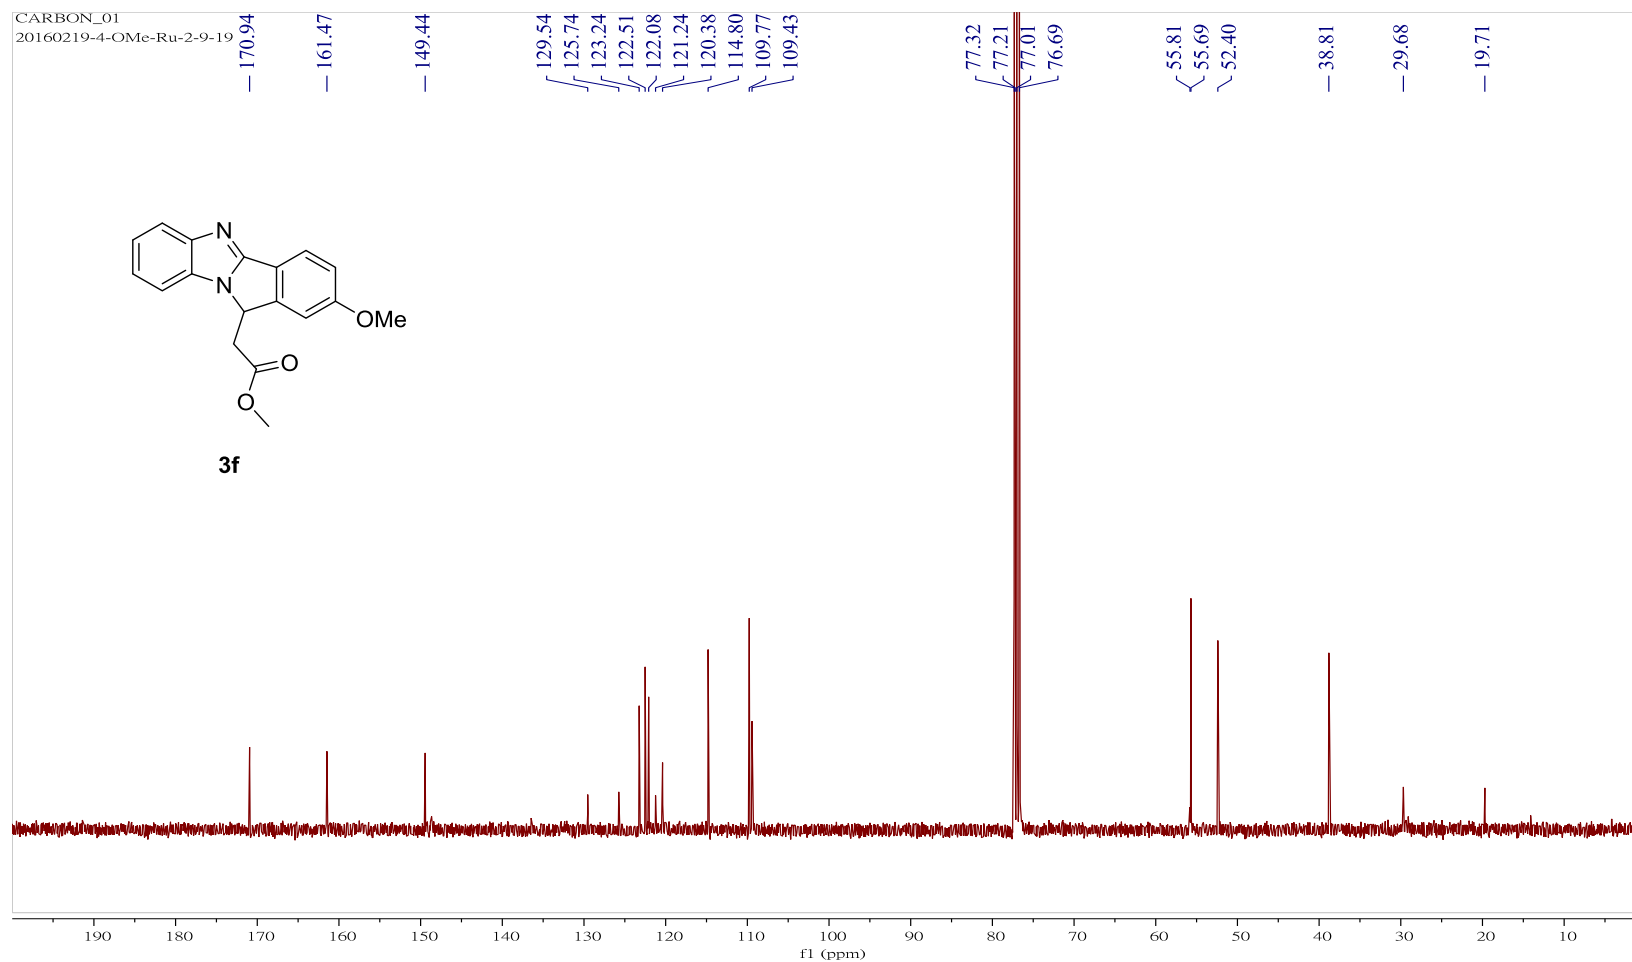

$^{13}\text{C}$  NMR Spectrum (100 MHz) of compound **3f** in  $\text{CDCl}_3$

4-OMe-Ru

20160230014 8 (0.548) Cn (Cen,3, 80.00, Ht); Sm (Mn, 2x0.75); Sb (3,50.00 ); Cm (7:13-1:2)

Scan ES+  
4.85e7

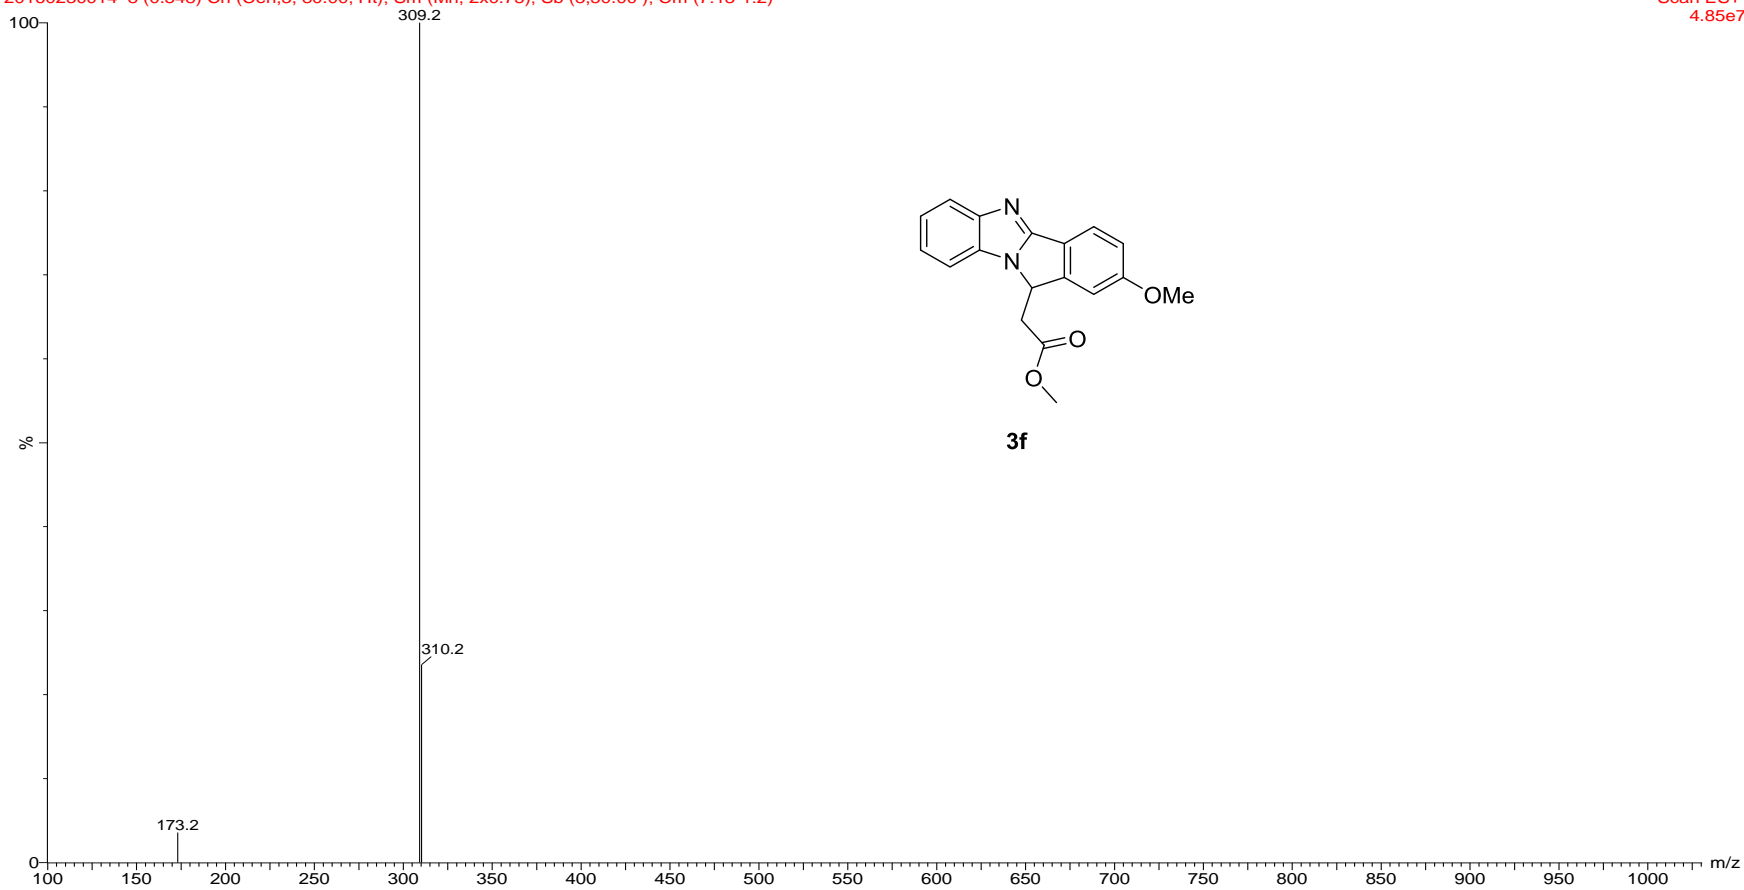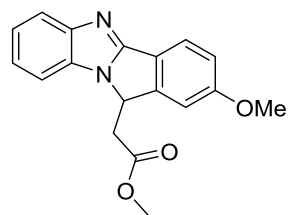

3f

ESI<sup>+</sup> Mass spectrum of compound 3f

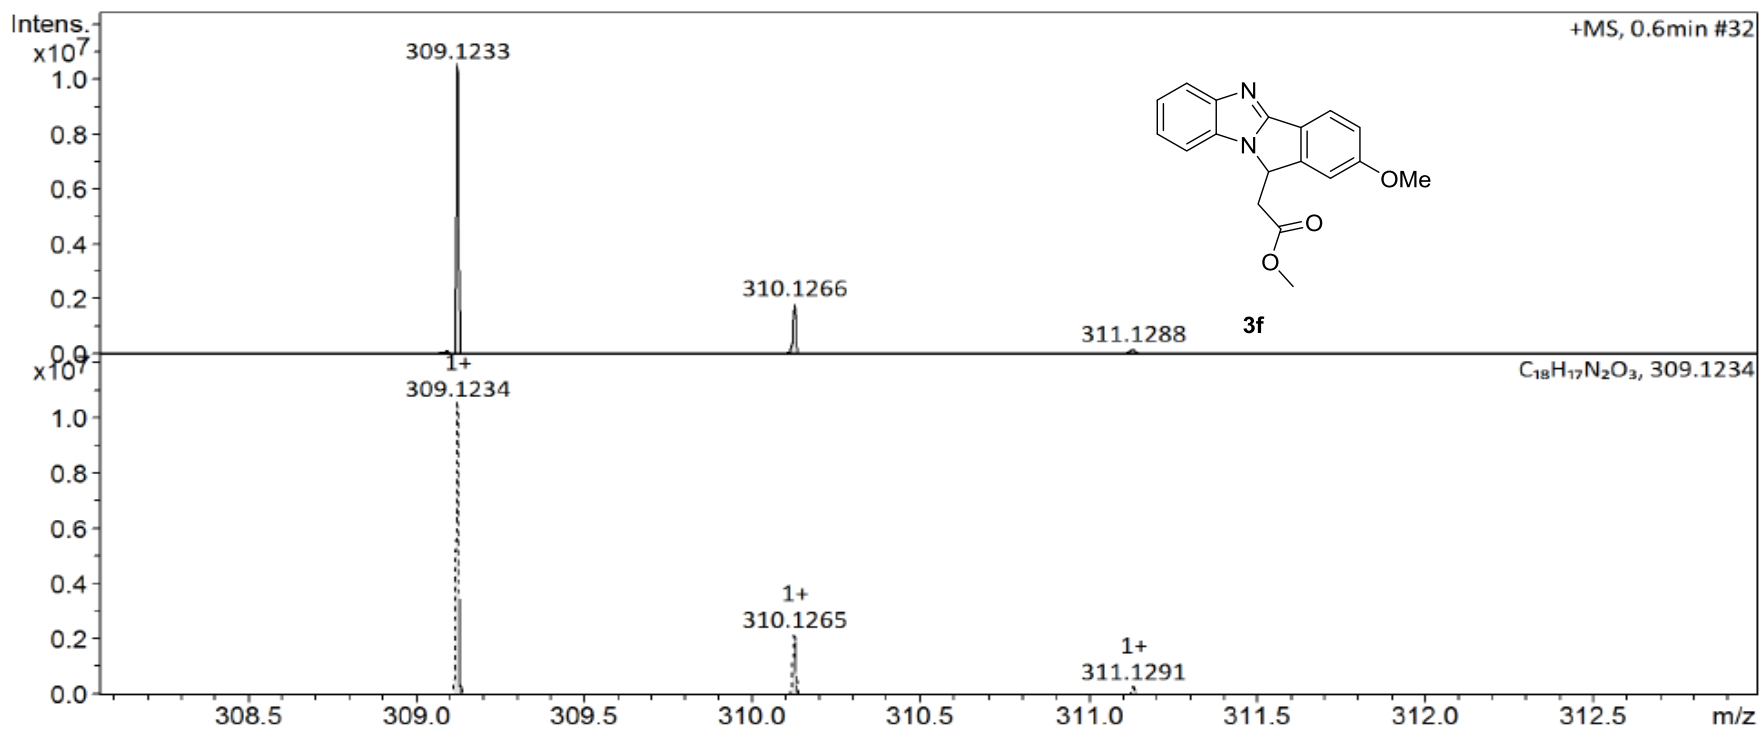

| Meas. m/z | # | Ion Formula                                                   | m/z      | err [ppm] | mSigma | # Sigma | Score  | rdb  | e <sup>-</sup> Conf | N-Rule | Adduct |
|-----------|---|---------------------------------------------------------------|----------|-----------|--------|---------|--------|------|---------------------|--------|--------|
| 309.1233  | 1 | C <sub>18</sub> H <sub>17</sub> N <sub>2</sub> O <sub>3</sub> | 309.1234 | -0.3      | 17.5   | 1       | 100.00 | 11.5 | even                | ok     | M+H    |

High resolution mass (ESI)<sup>+</sup> spectrum of compound of **3f**

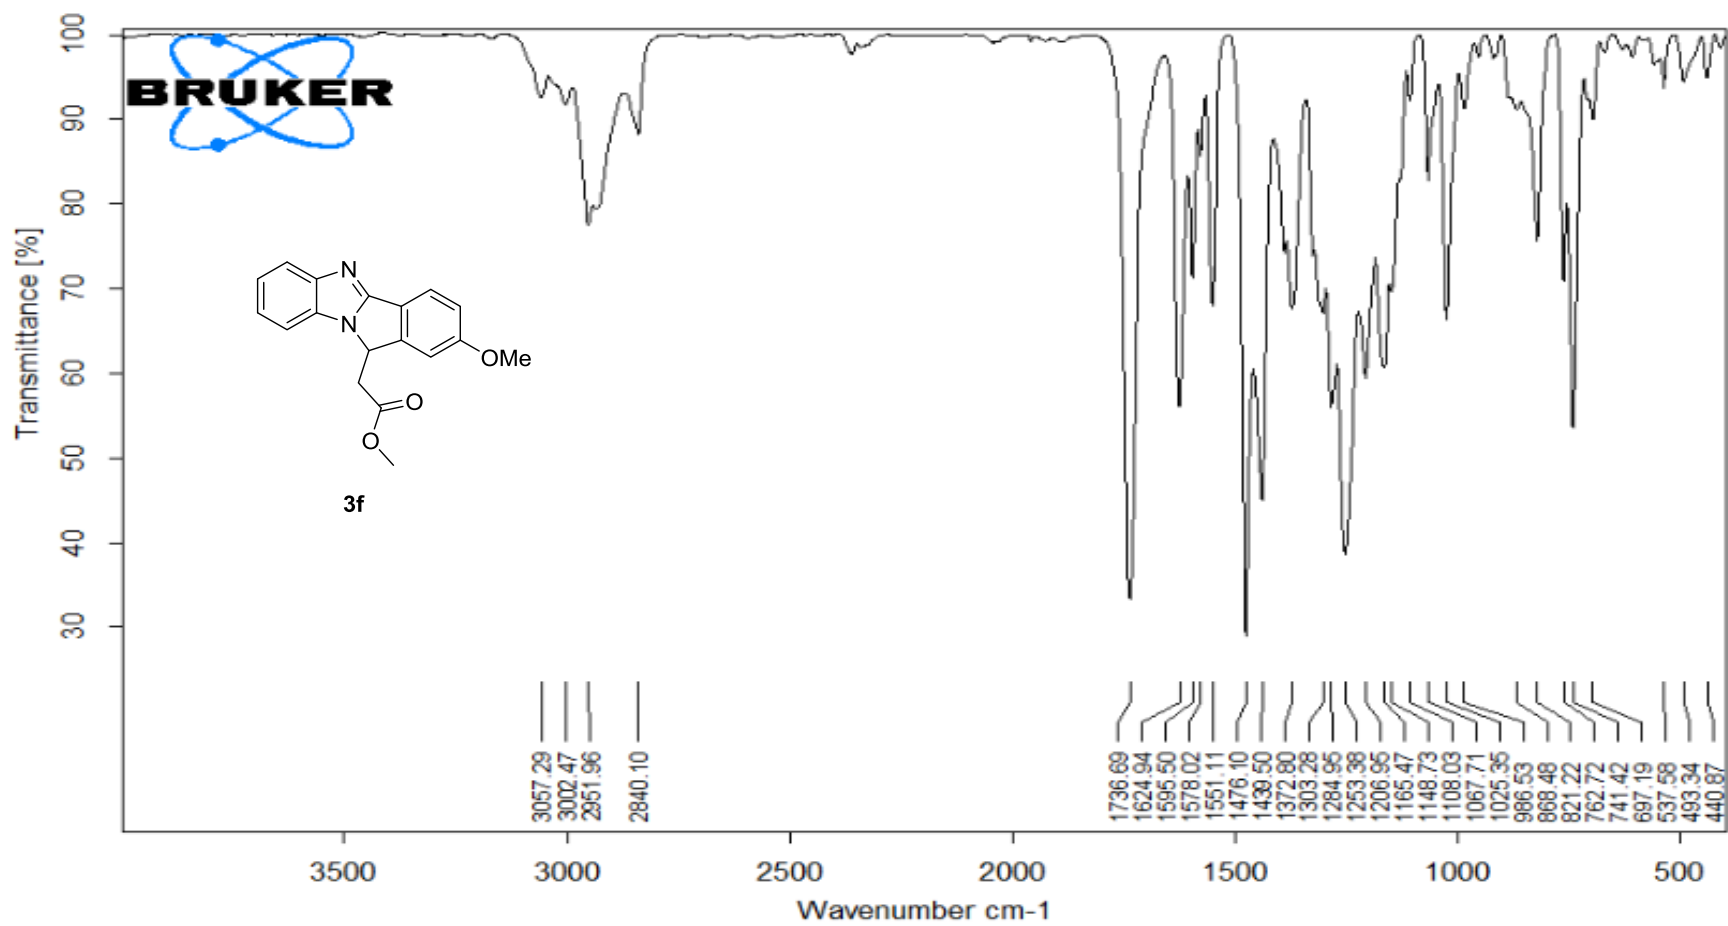

IR spectrum of compound of 3f

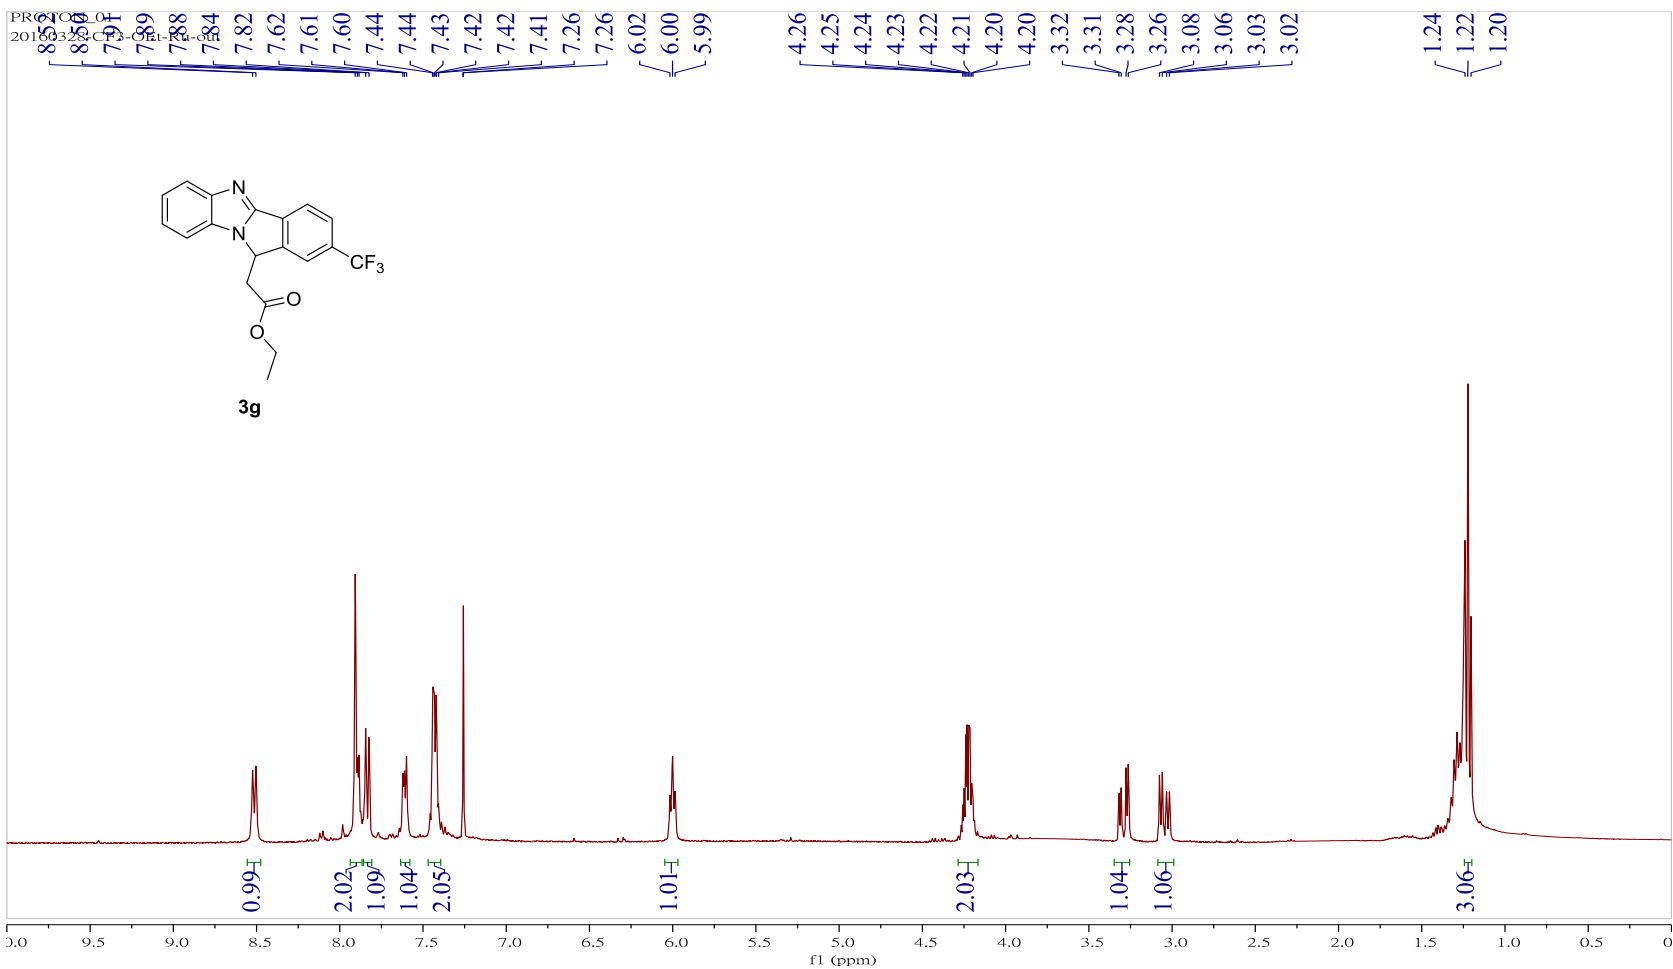

<sup>1</sup>H NMR Spectrum (400 MHz) of compound **3g** in CDCl<sub>3</sub>

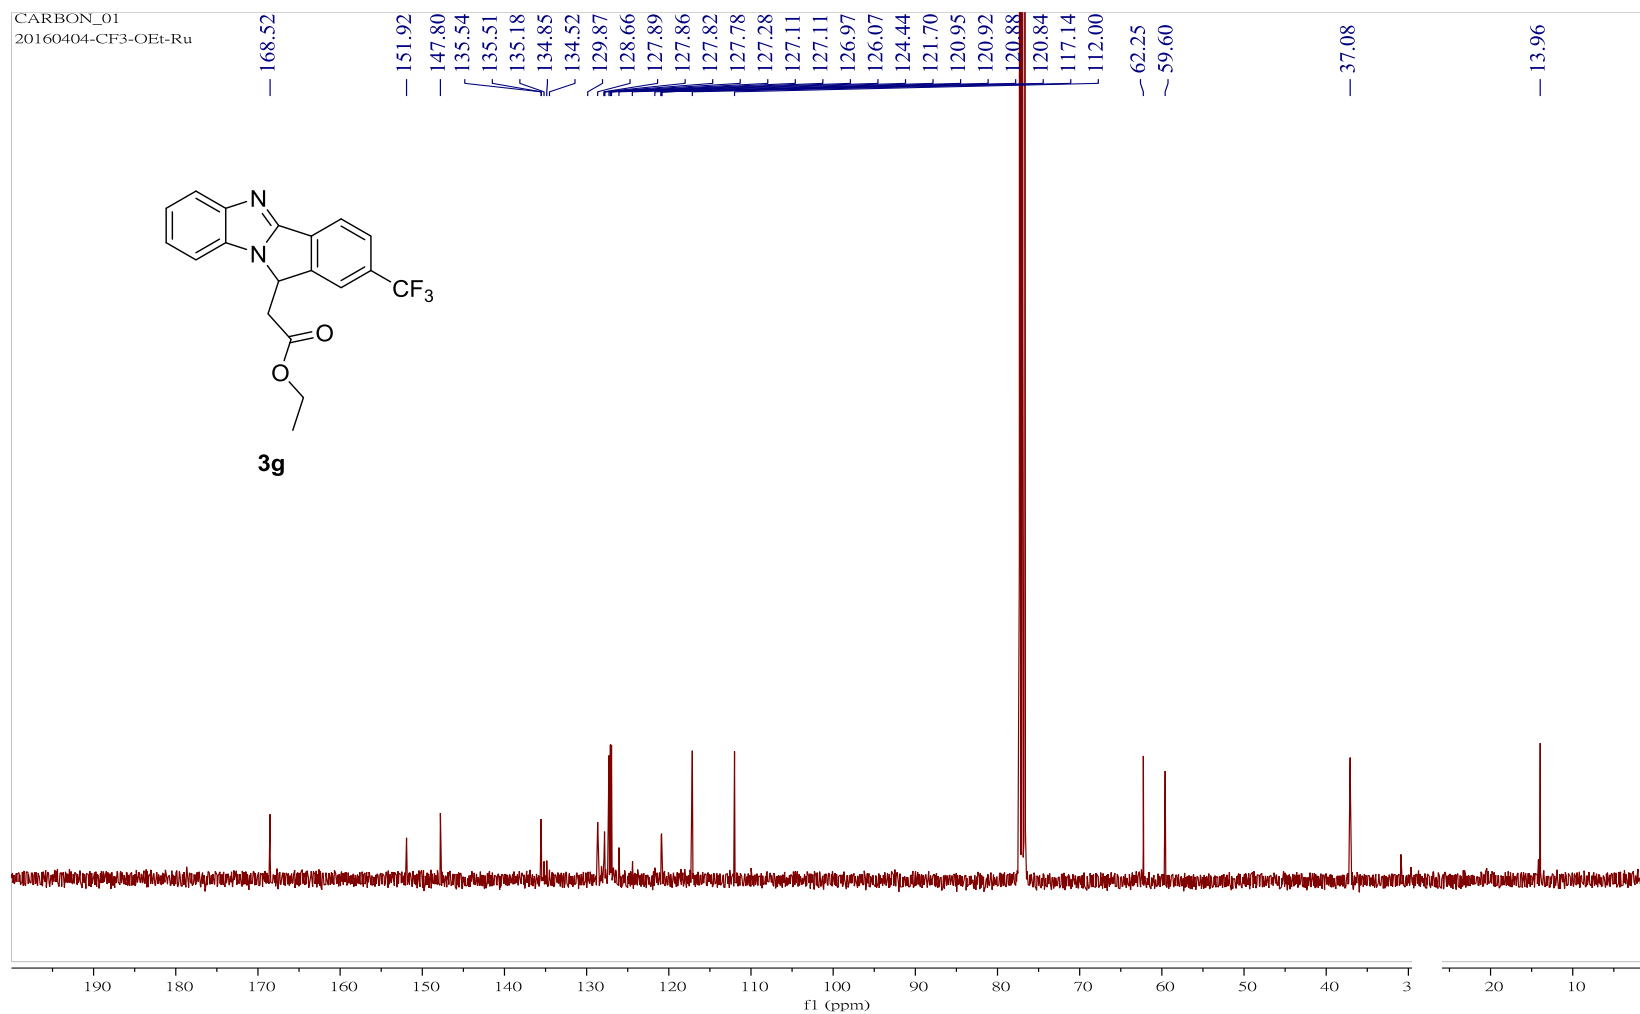

$^{13}\text{C}$  NMR Spectrum (100 MHz) of compound **3g** in  $\text{CDCl}_3$



CF3-OEt-Ru

201603250010 17 (1.164) Cn (Cen,3, 80.00, Ht); Sm (Mn, 2x0.75); Sb (3,50.00 ); Cm (16:20-4:12)

Scan ES+  
6.94e7

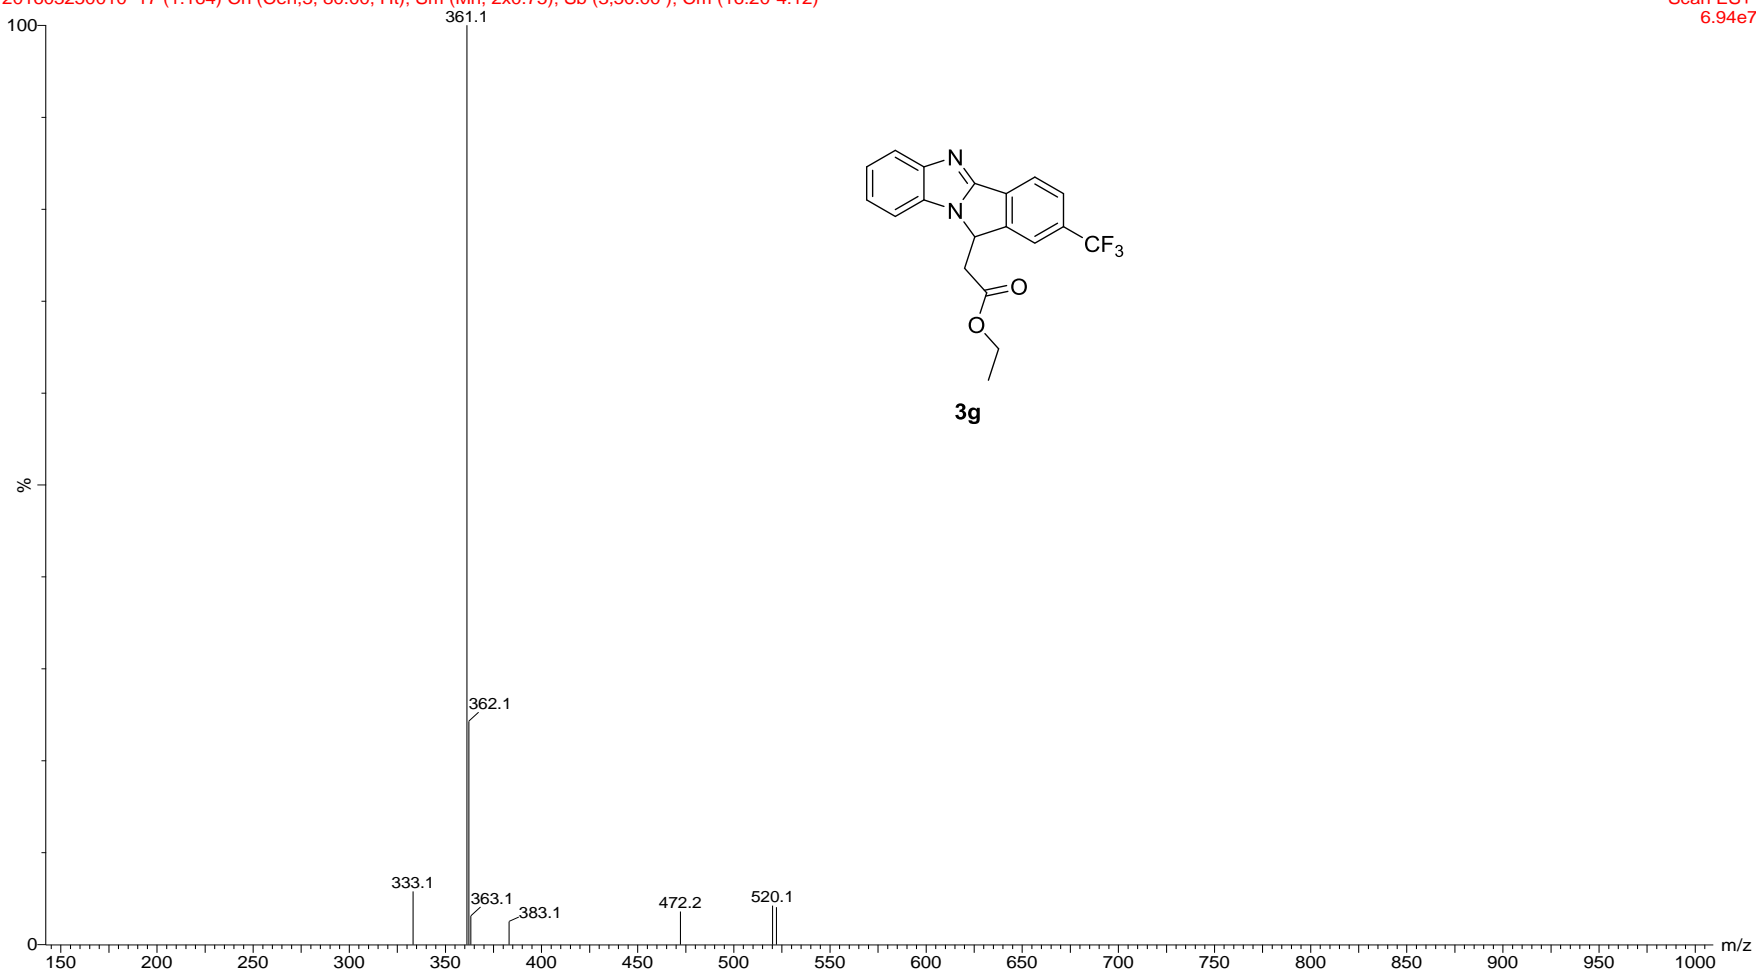

ESI<sup>+</sup> Mass spectrum of compound **3g**

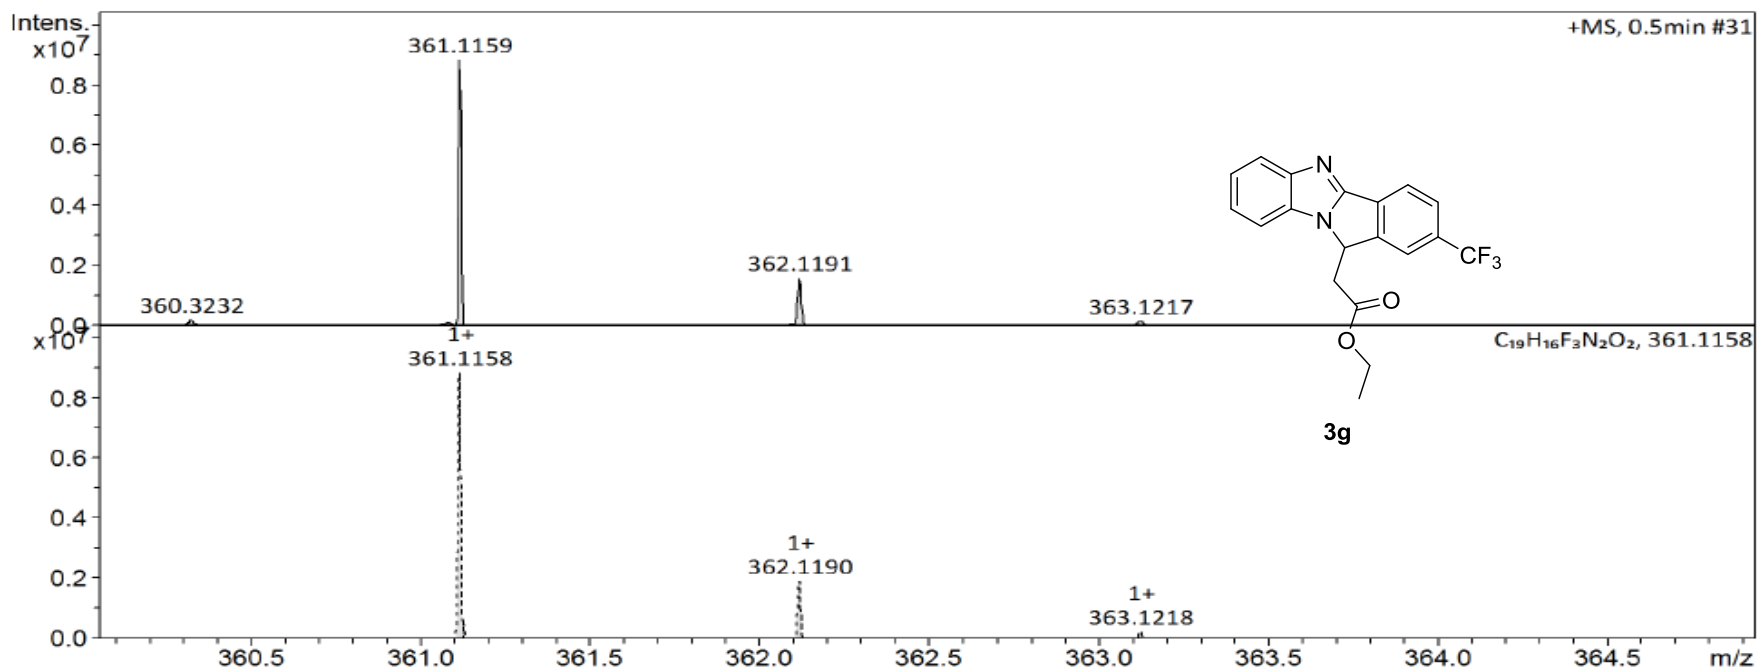

| Meas. m/z | # | Ion Formula                                                                  | m/z      | err [ppm] | mSigma | # Sigma | Score  | rdb  | e <sup>-</sup> Conf | N-Rule | Adduct |
|-----------|---|------------------------------------------------------------------------------|----------|-----------|--------|---------|--------|------|---------------------|--------|--------|
| 361.1159  | 1 | C <sub>19</sub> H <sub>16</sub> F <sub>3</sub> N <sub>2</sub> O <sub>2</sub> | 361.1158 | 0.3       | 20.4   | 1       | 100.00 | 11.5 | even                | ok     | M+H    |

High resolution mass (ESI)<sup>+</sup> spectrum of compound of **3g**

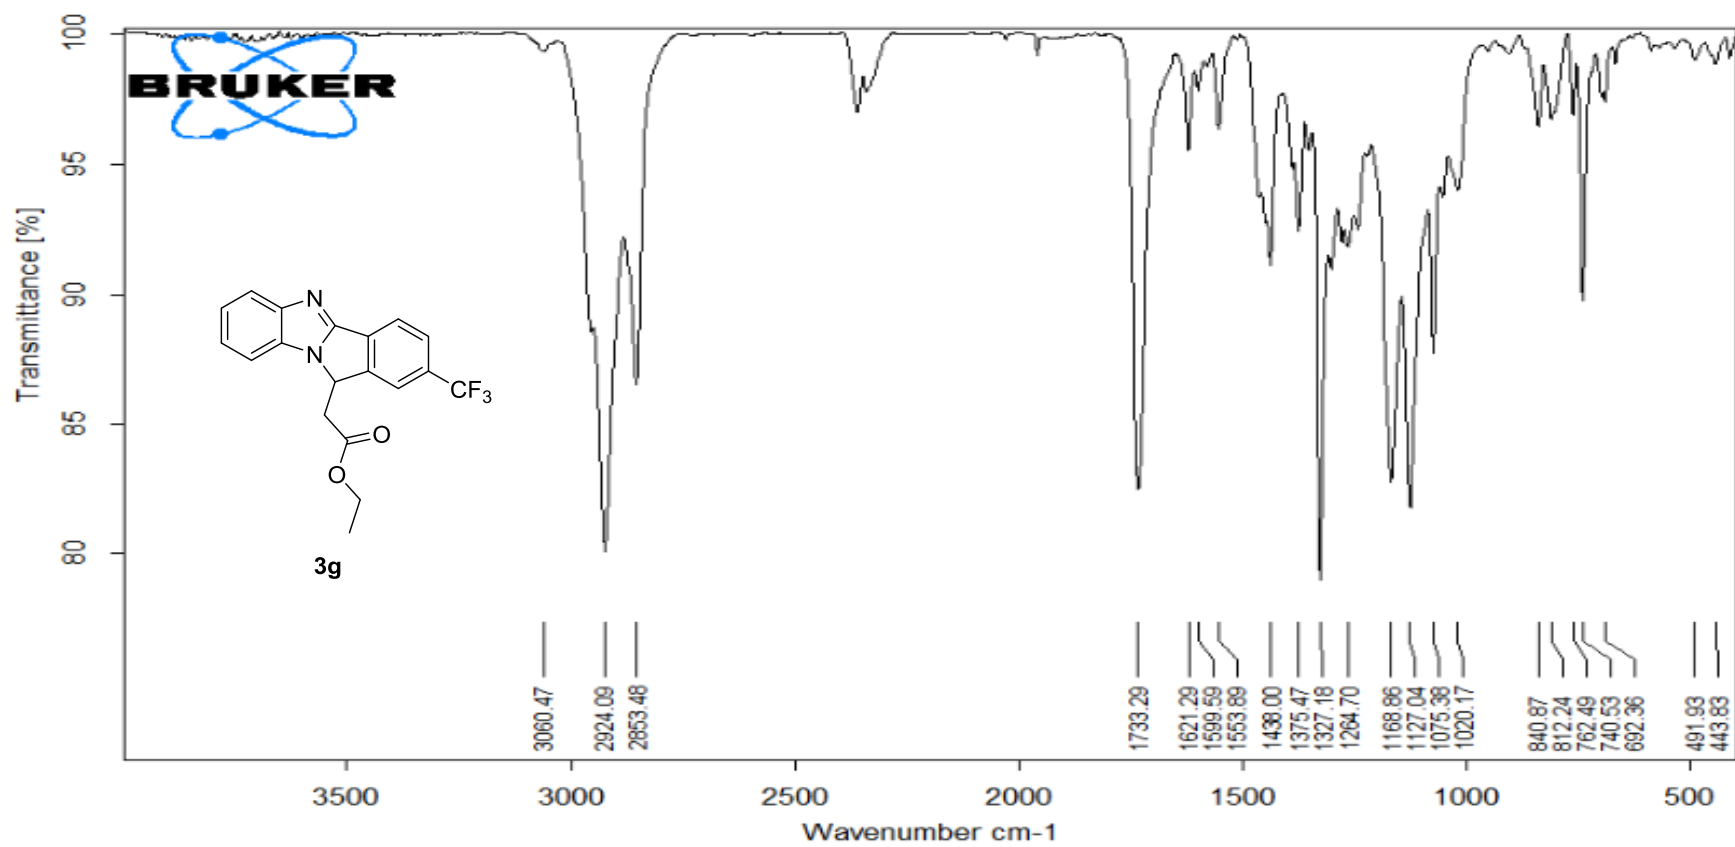

IR spectrum of compound of **3g**

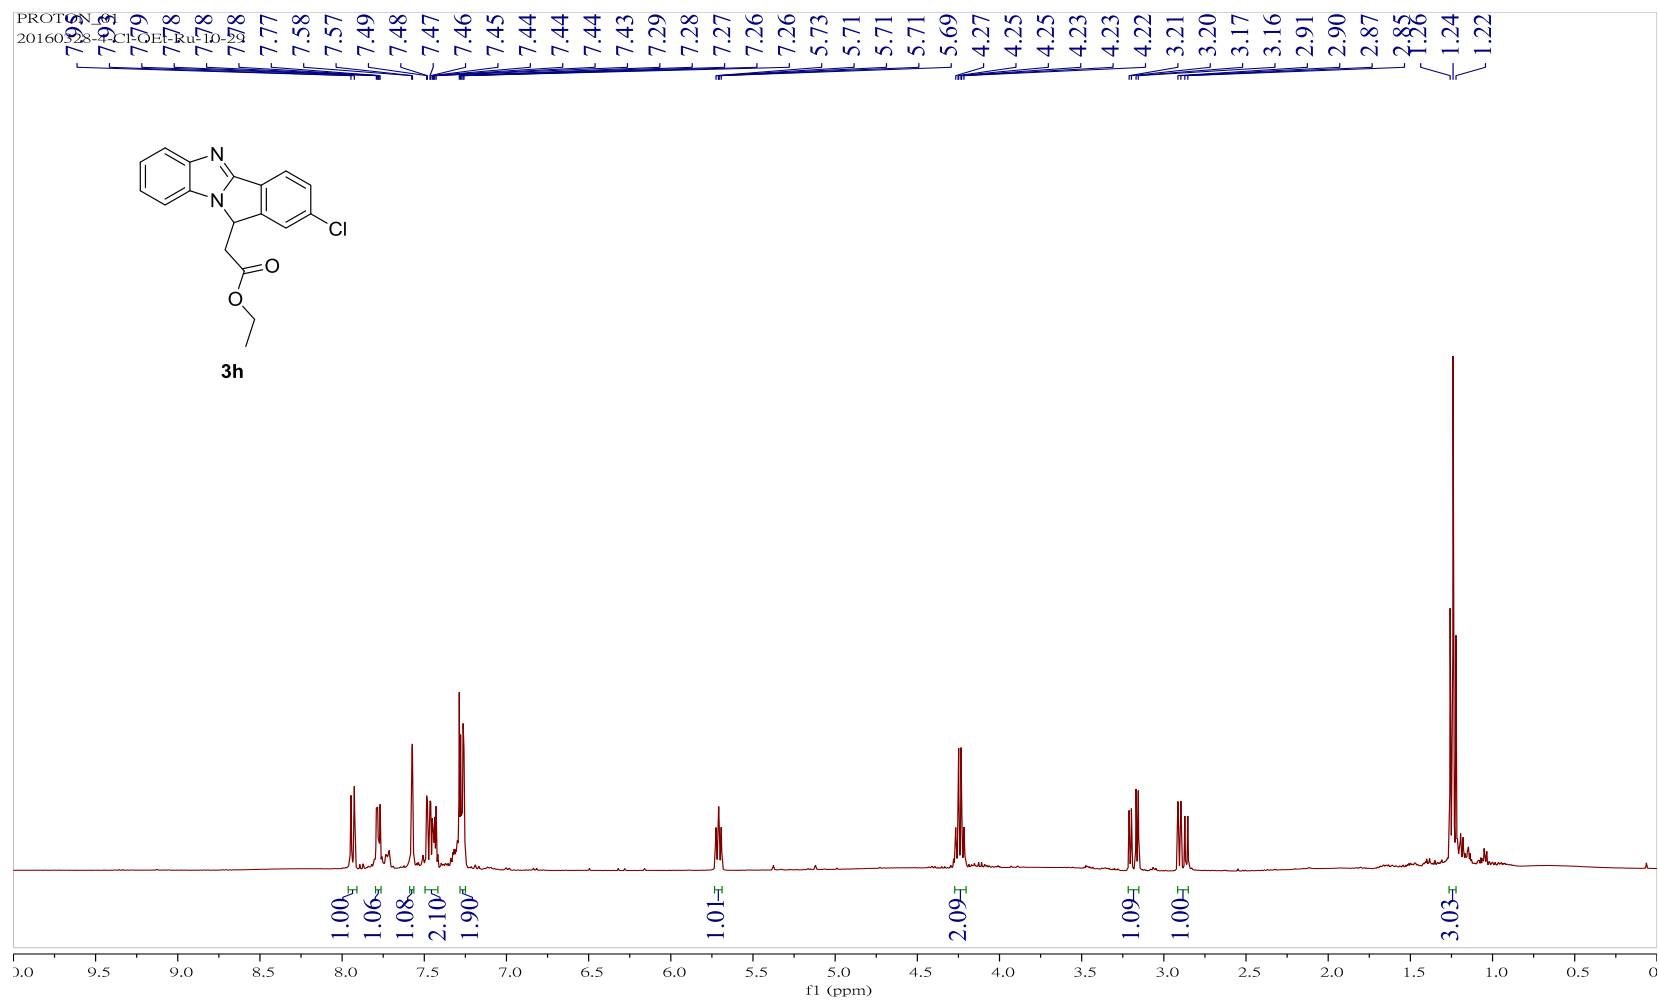

$^1\text{H}$  NMR Spectrum (400 MHz) of compound **3h** in  $\text{CDCl}_3$

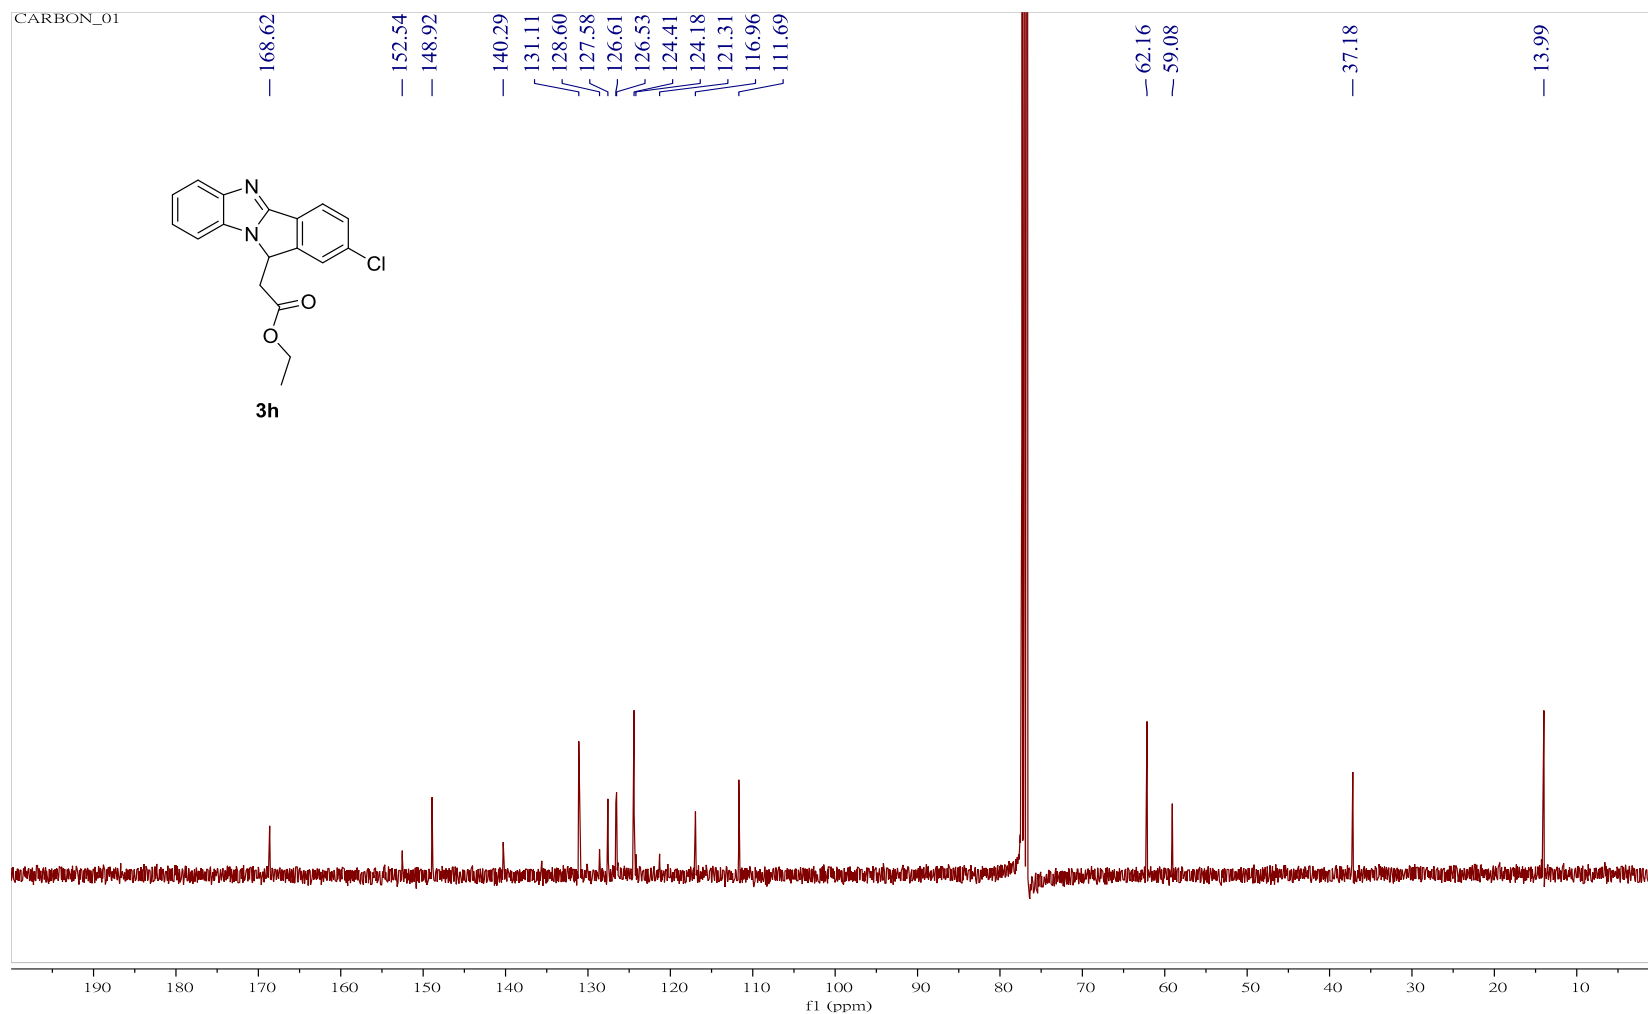

$^{13}\text{C}$  NMR Spectrum (100 MHz) of compound **3h** in  $\text{CDCl}_3$

**4-Cl-OEt-Ru**

20160329008 9 (0.616) Cn (Cen,3, 80.00, Ht); Sm (Mn, 2x0.75); Sb (3,50.00 ); Cm (8:15-1:5)

Scan ES+  
2.88e7

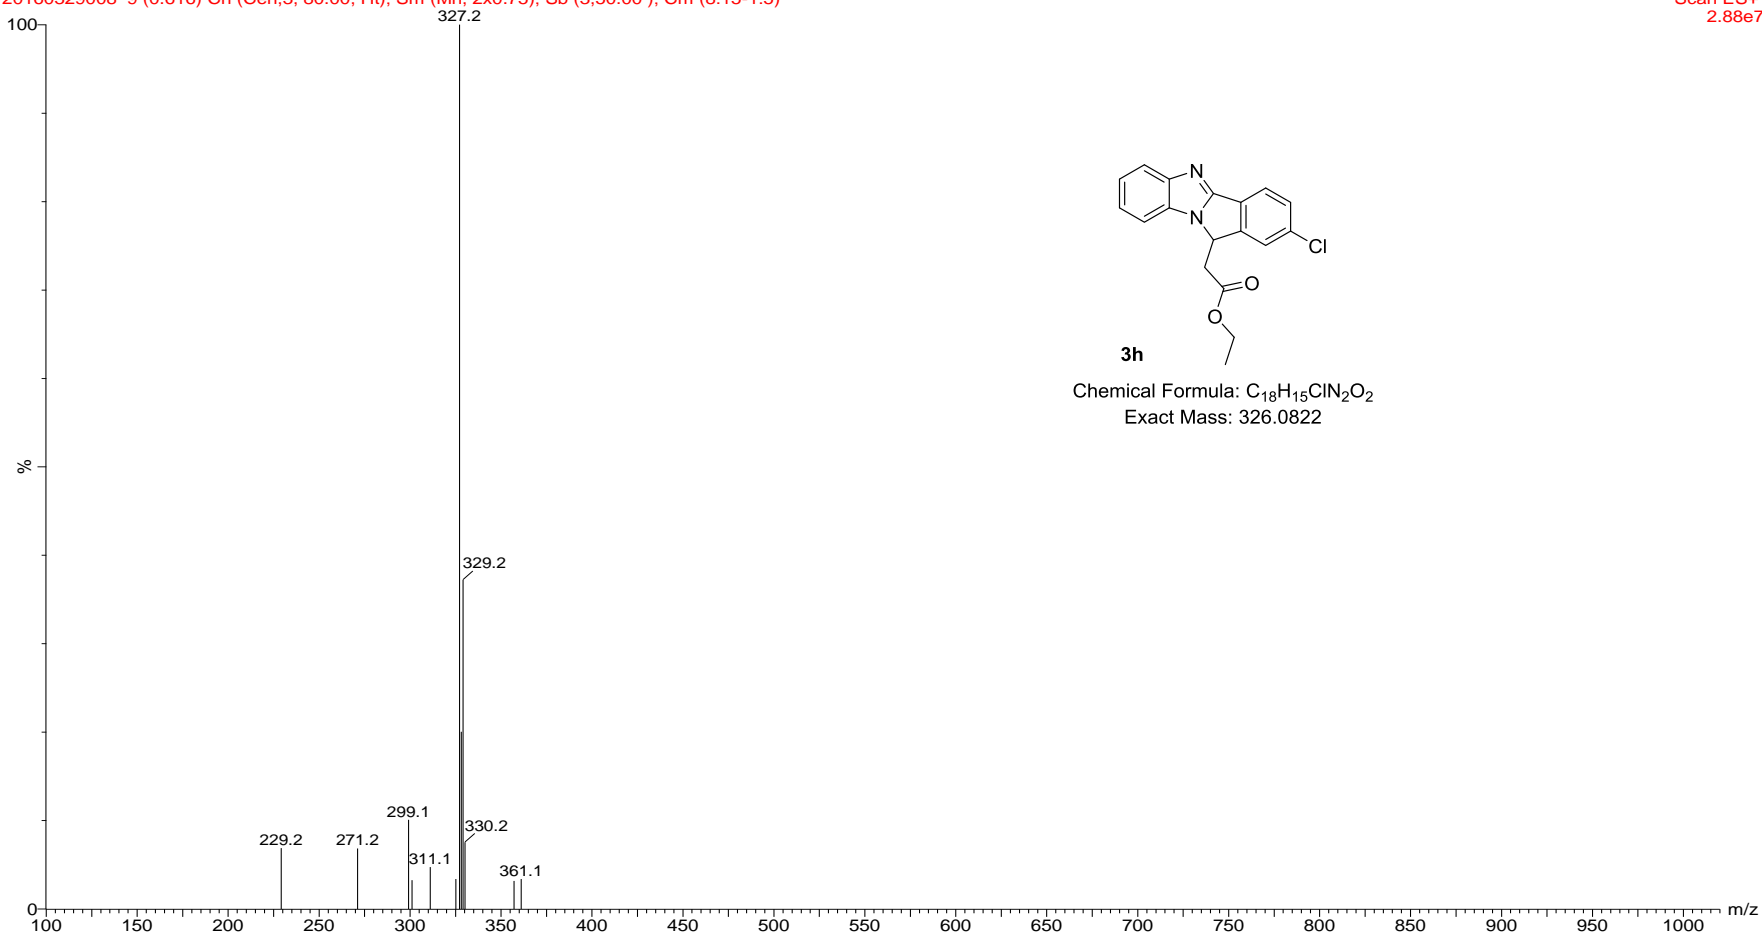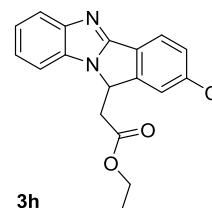

Chemical Formula: C<sub>18</sub>H<sub>15</sub>ClN<sub>2</sub>O<sub>2</sub>

Exact Mass: 326.0822

ESI<sup>+</sup> Mass spectrum of compound **3h**

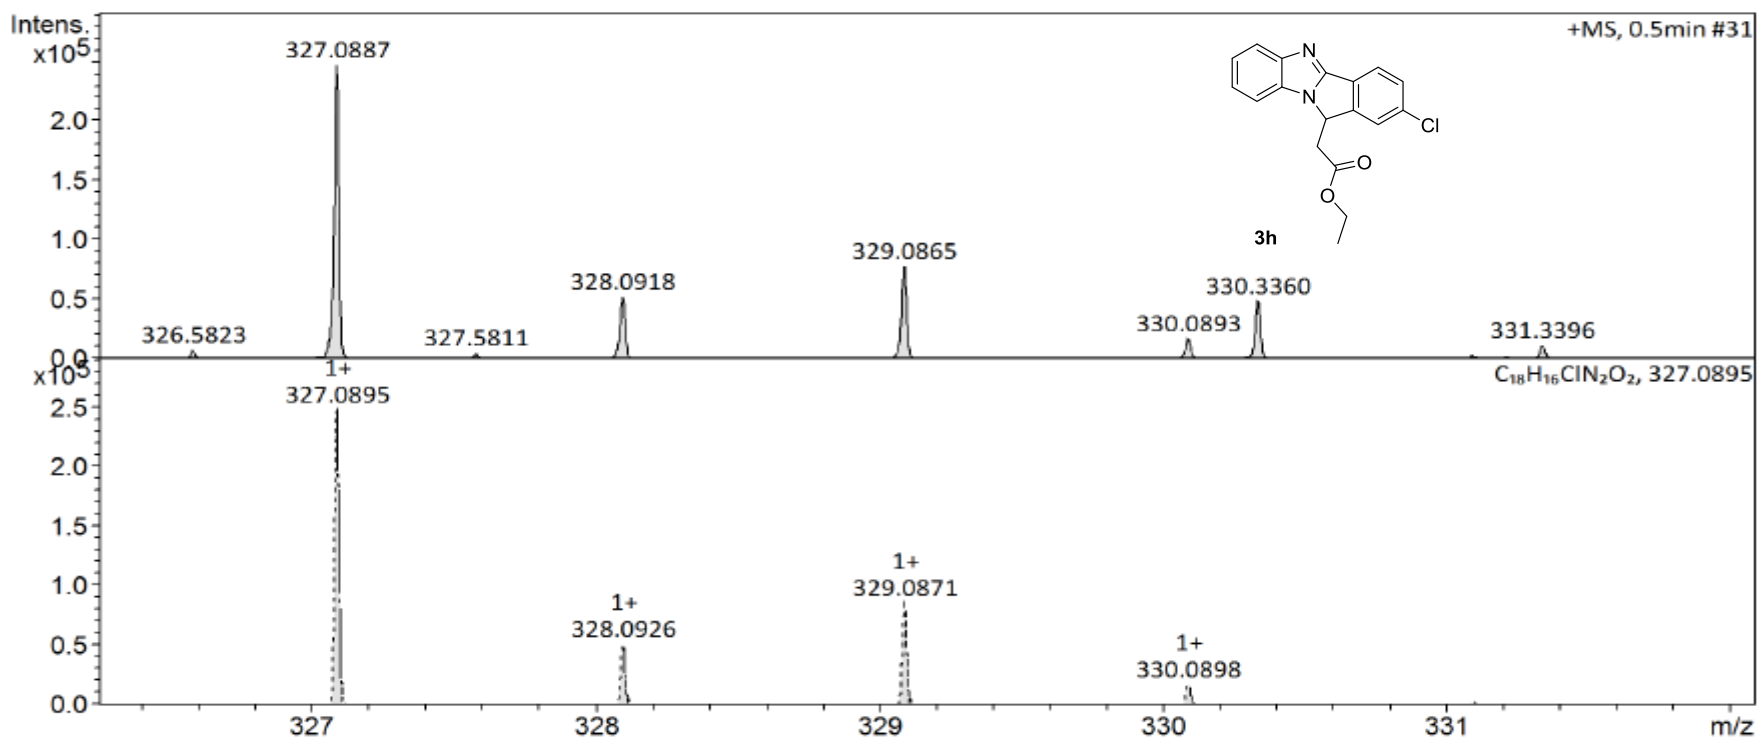

| Meas. m/z | # | Ion Formula                                                     | m/z      | err [ppm] | mSigma | # Sigma | Score  | rdb  | e <sup>-</sup> Conf | N-Rule | Adduct |
|-----------|---|-----------------------------------------------------------------|----------|-----------|--------|---------|--------|------|---------------------|--------|--------|
| 327.0887  | 1 | C <sub>18</sub> H <sub>16</sub> ClN <sub>2</sub> O <sub>2</sub> | 327.0895 | 2.3       | 14.1   | 1       | 100.00 | 11.5 | even                | ok     | M+H    |

High resolution mass (ESI)<sup>+</sup> spectrum of compound of **3h**

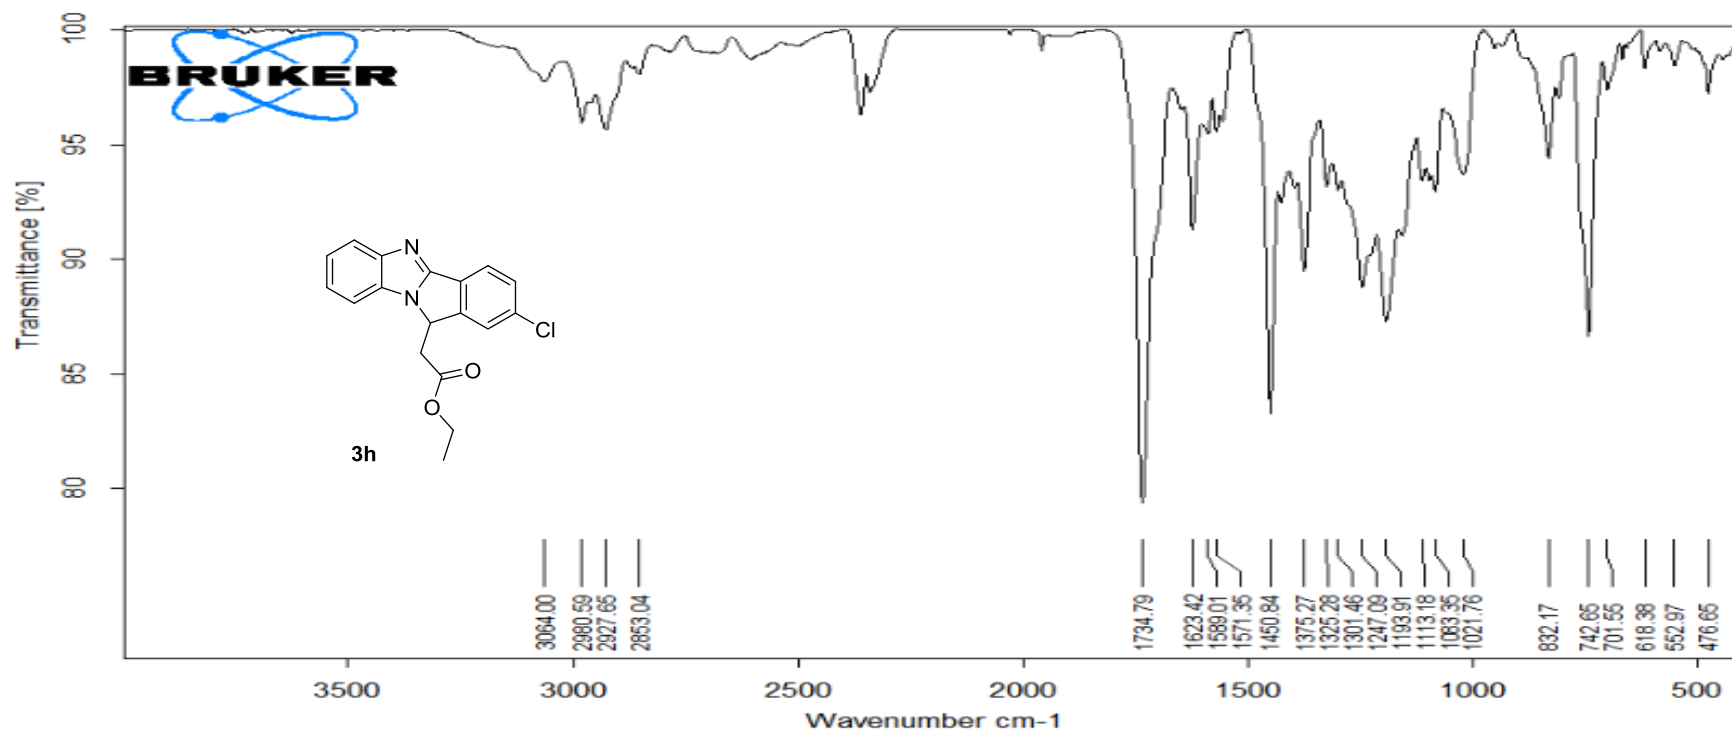

IR spectrum of compound of **3h**



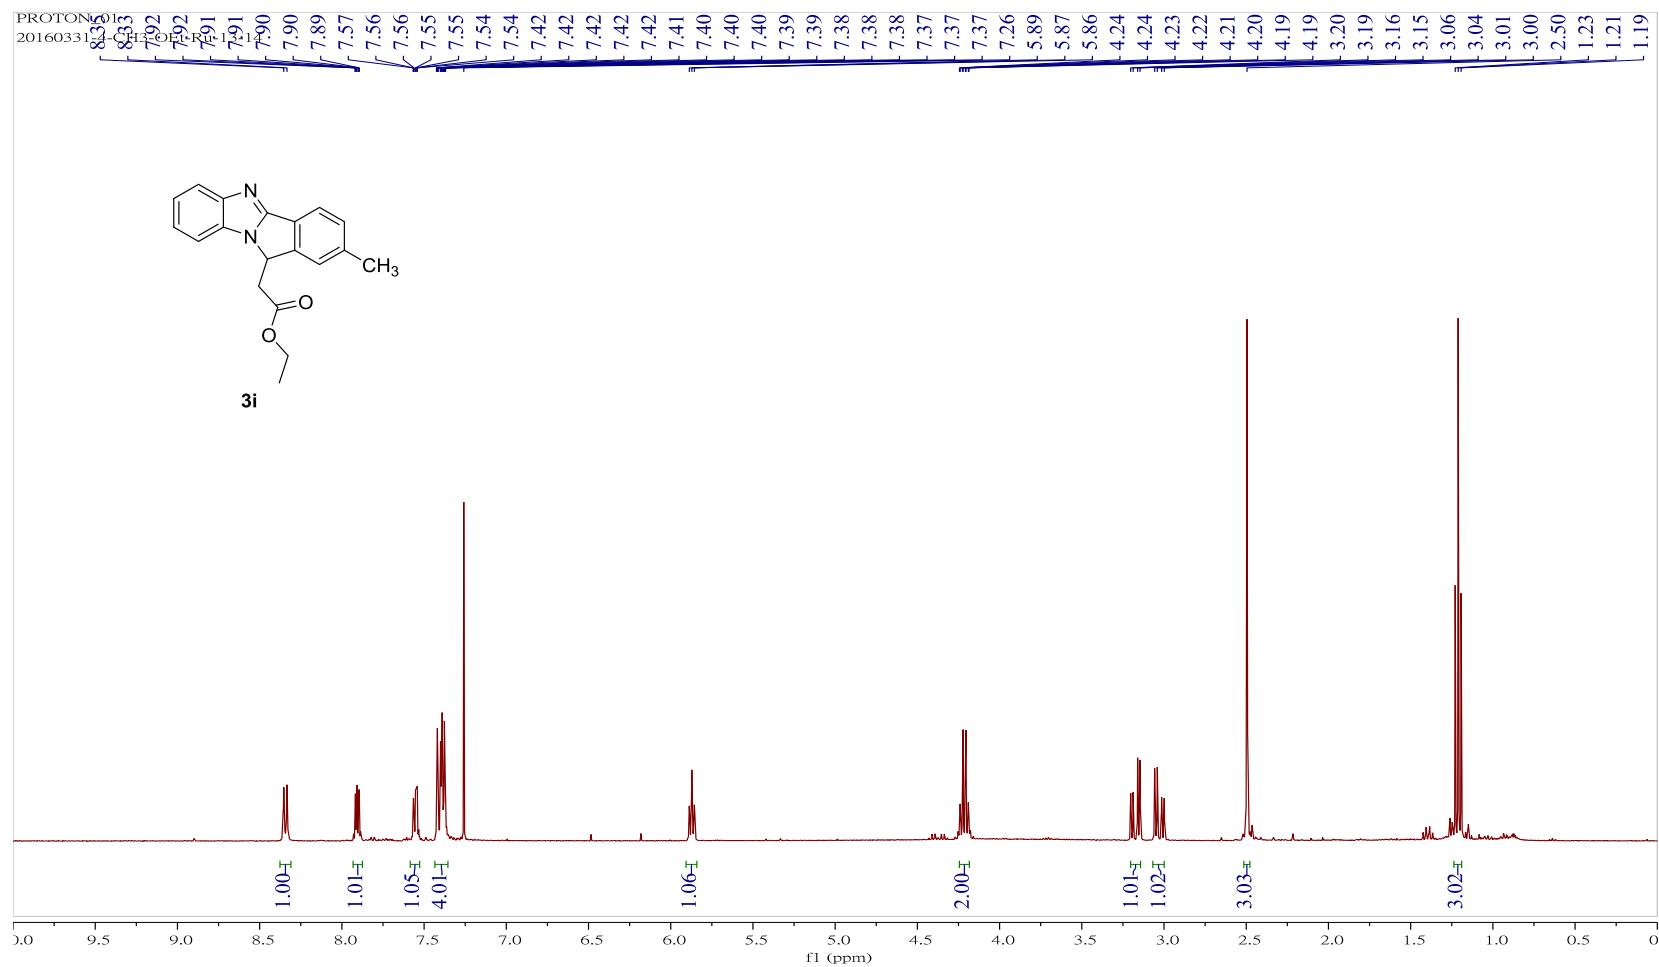

$^1\text{H}$  NMR Spectrum (400 MHz) of compound **3i** in  $\text{CDCl}_3$

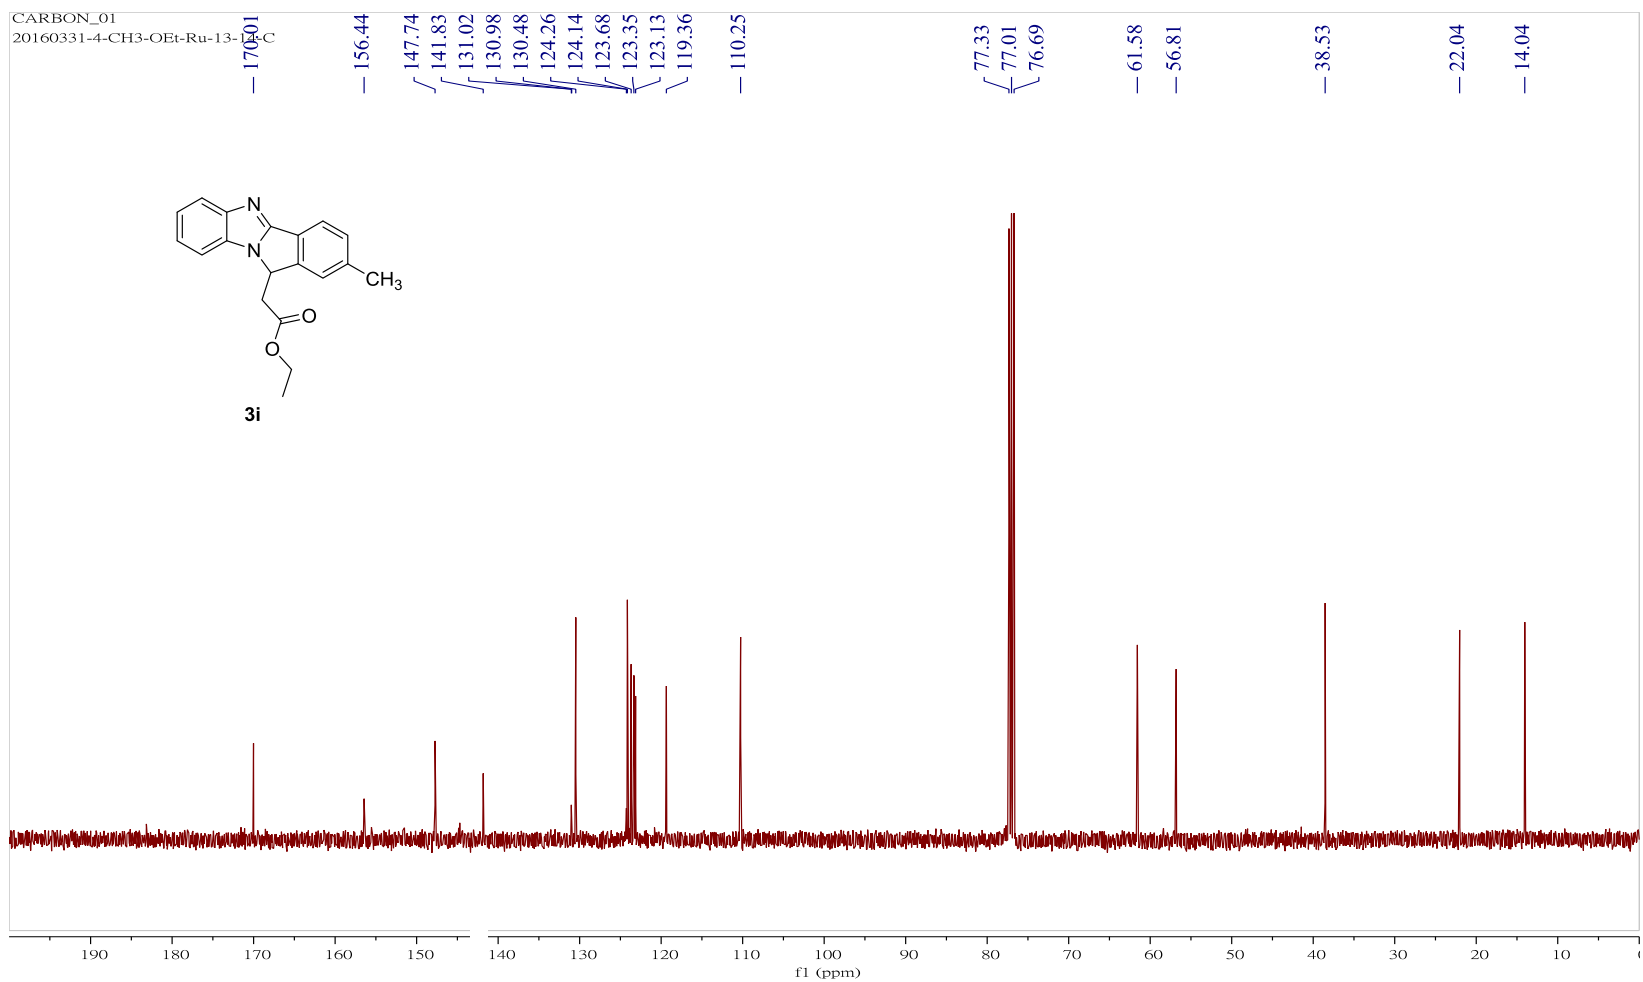

$^{13}\text{C}$  NMR Spectrum (100 MHz) of compound **3i** in  $\text{CDCl}_3$

4-CH3-OEt-Ru

201604080027 13 (0.890) Cn (Cen,3, 80.00, Ht); Sm (Mn, 2x0.75); Sb (3,50.00); Cm (13:19-3:9)

Scan ES+  
6.27e7

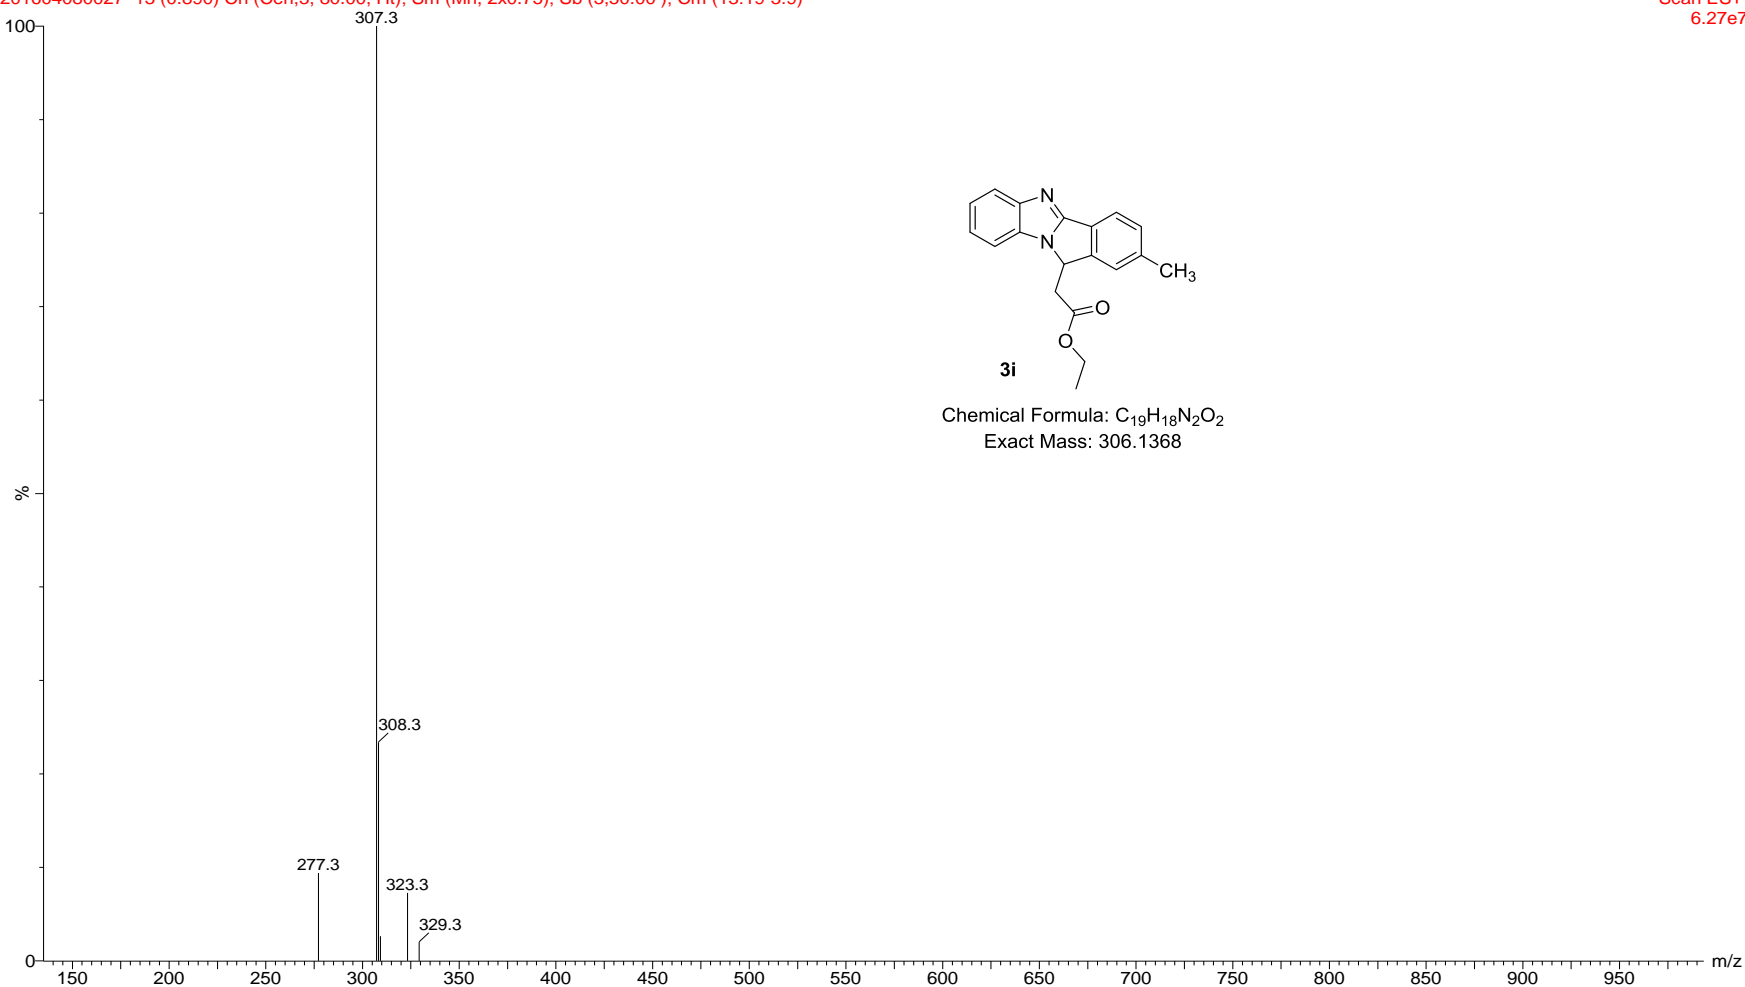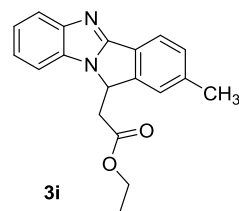

Chemical Formula: C<sub>19</sub>H<sub>18</sub>N<sub>2</sub>O<sub>2</sub>  
Exact Mass: 306.1368

ESI<sup>+</sup> Mass spectrum of compound **3i**

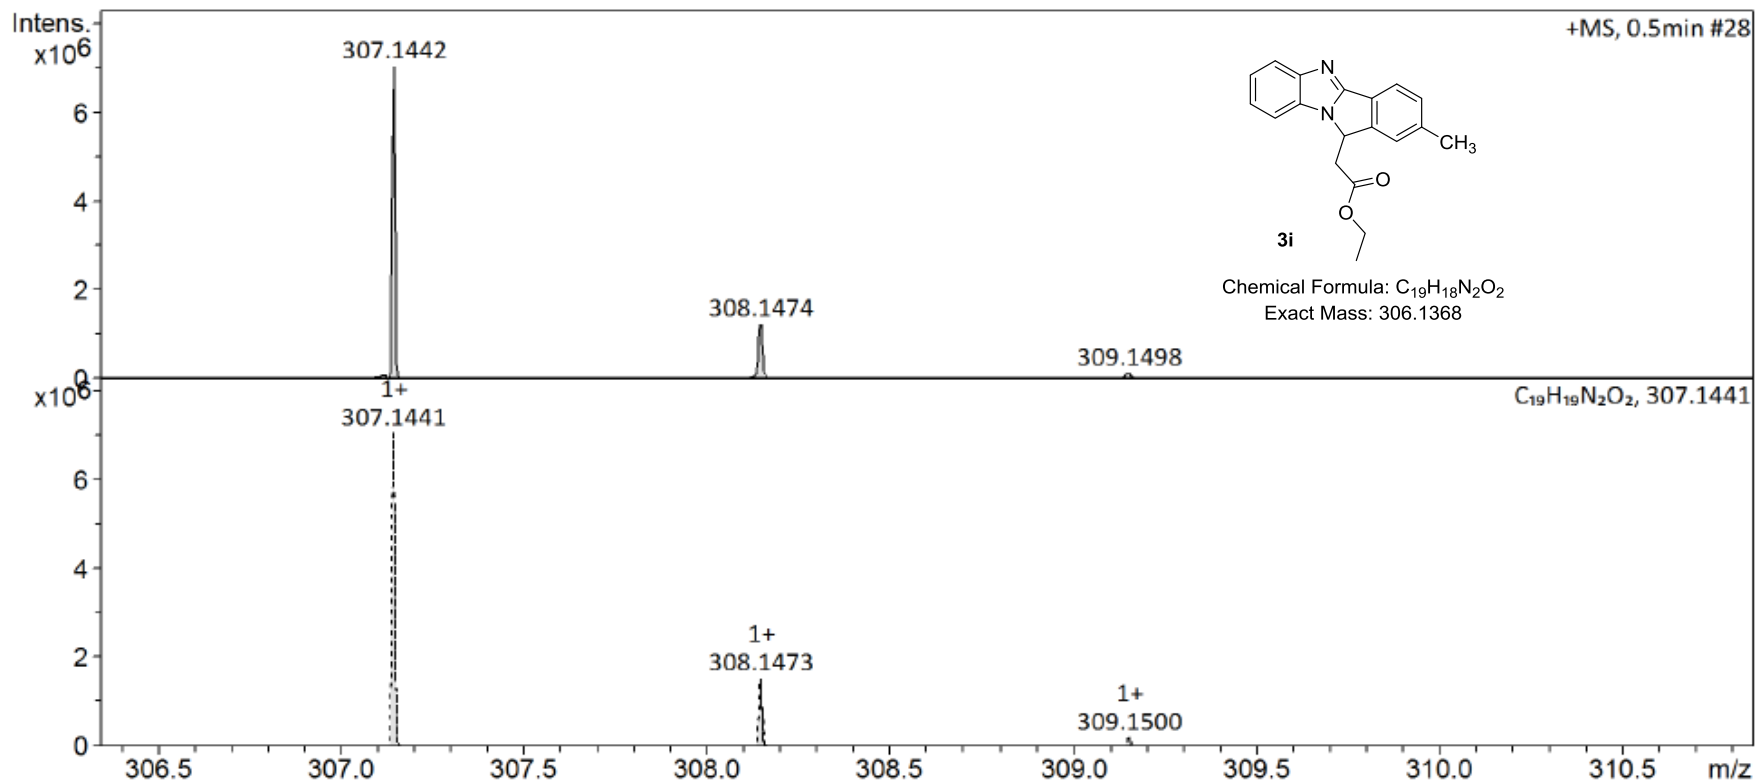

| Meas. m/z | # | Ion Formula                                                   | m/z      | err [ppm] | mSigma | # Sigma | Score  | rdb  | e <sup>-</sup> Conf | N-Rule | Adduct |
|-----------|---|---------------------------------------------------------------|----------|-----------|--------|---------|--------|------|---------------------|--------|--------|
| 307.1442  | 1 | C <sub>19</sub> H <sub>19</sub> N <sub>2</sub> O <sub>2</sub> | 307.1441 | 0.4       | 24.5   | 1       | 100.00 | 11.5 | even                | ok     | M+H    |

High resolution mass (ESI)<sup>+</sup> spectrum of compound of **3i**

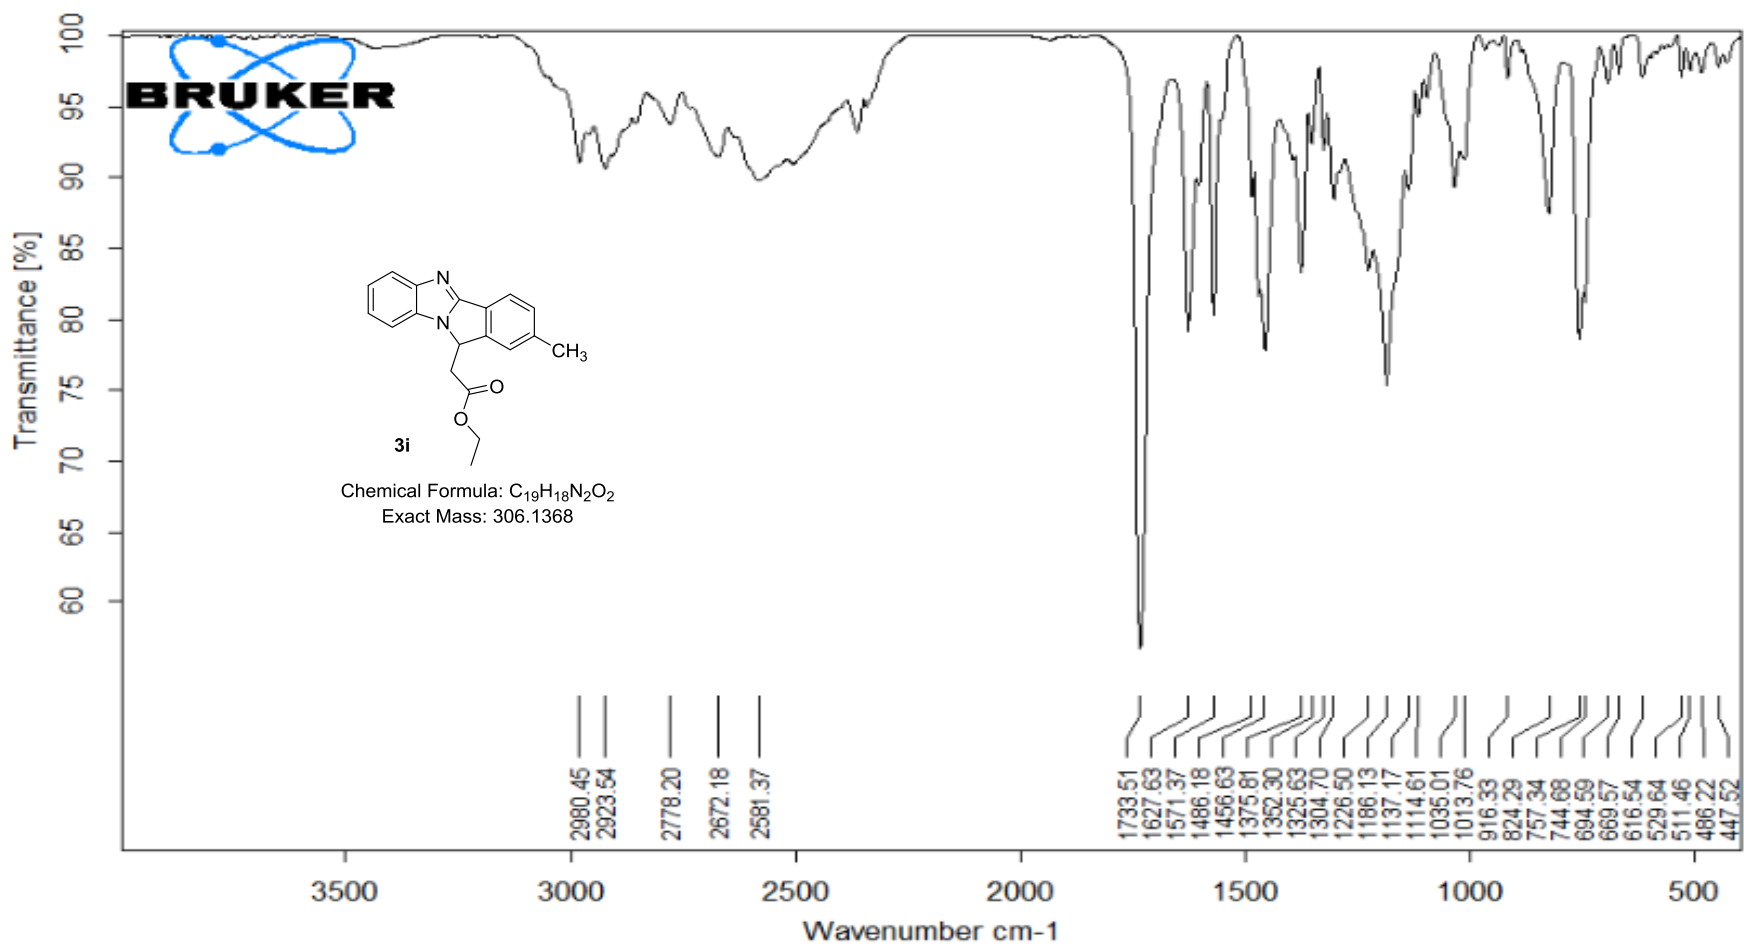

IR spectrum of compound of **3i**

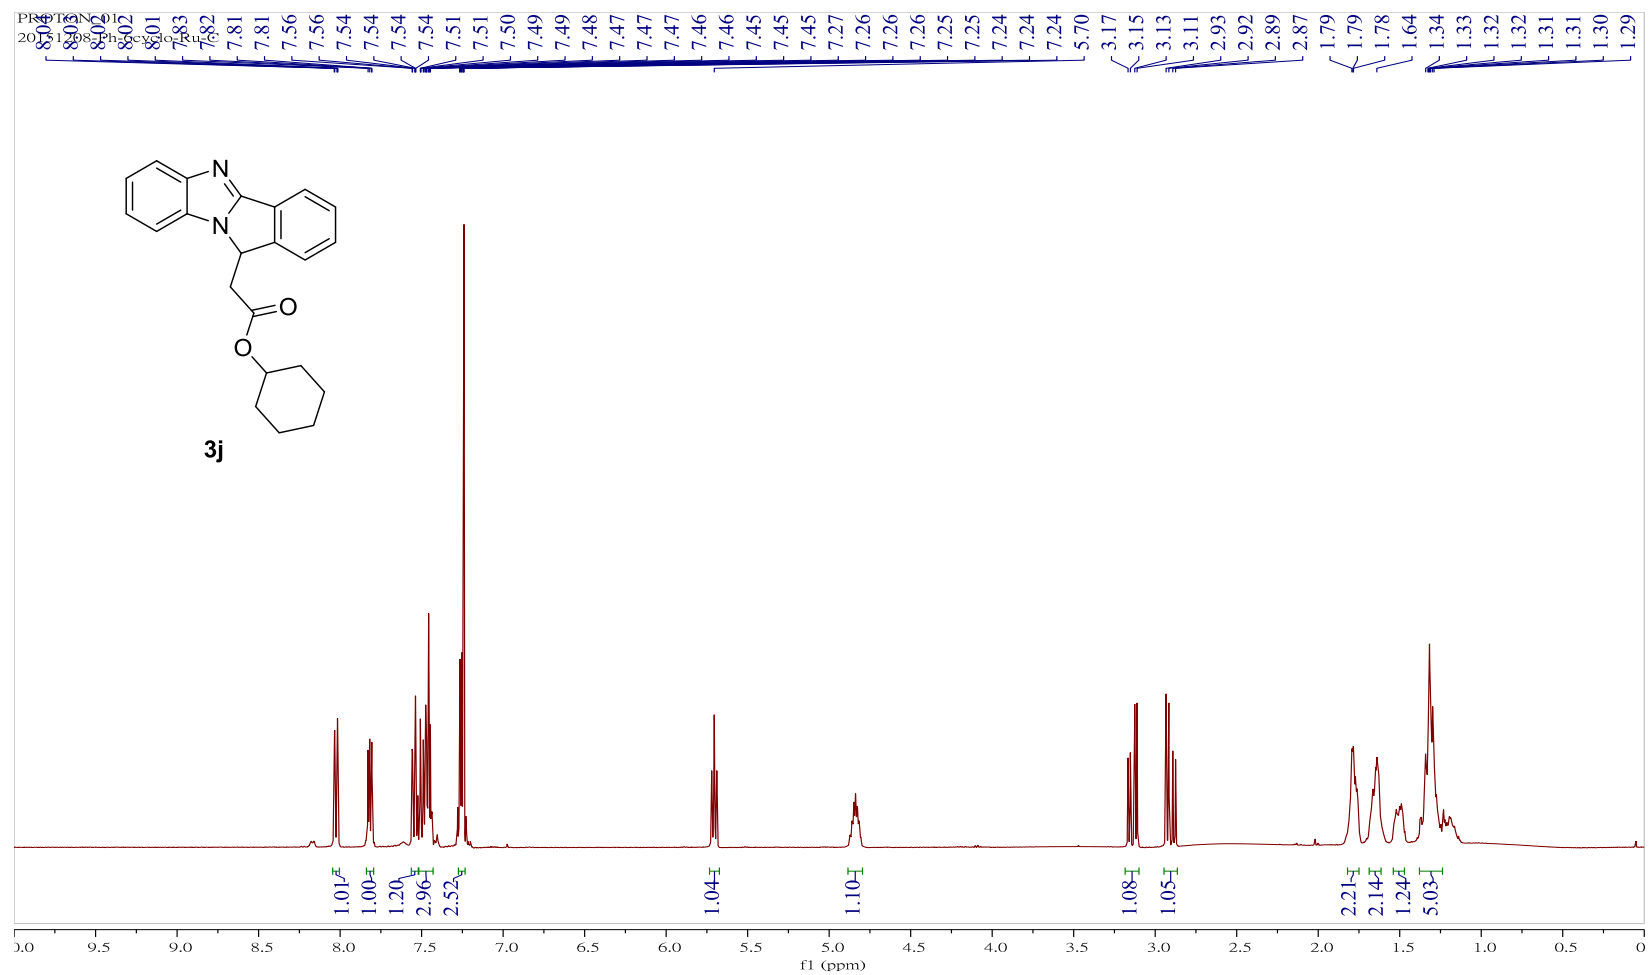

<sup>1</sup>H NMR Spectrum (400 MHz) of compound **3j** in CDCl<sub>3</sub>

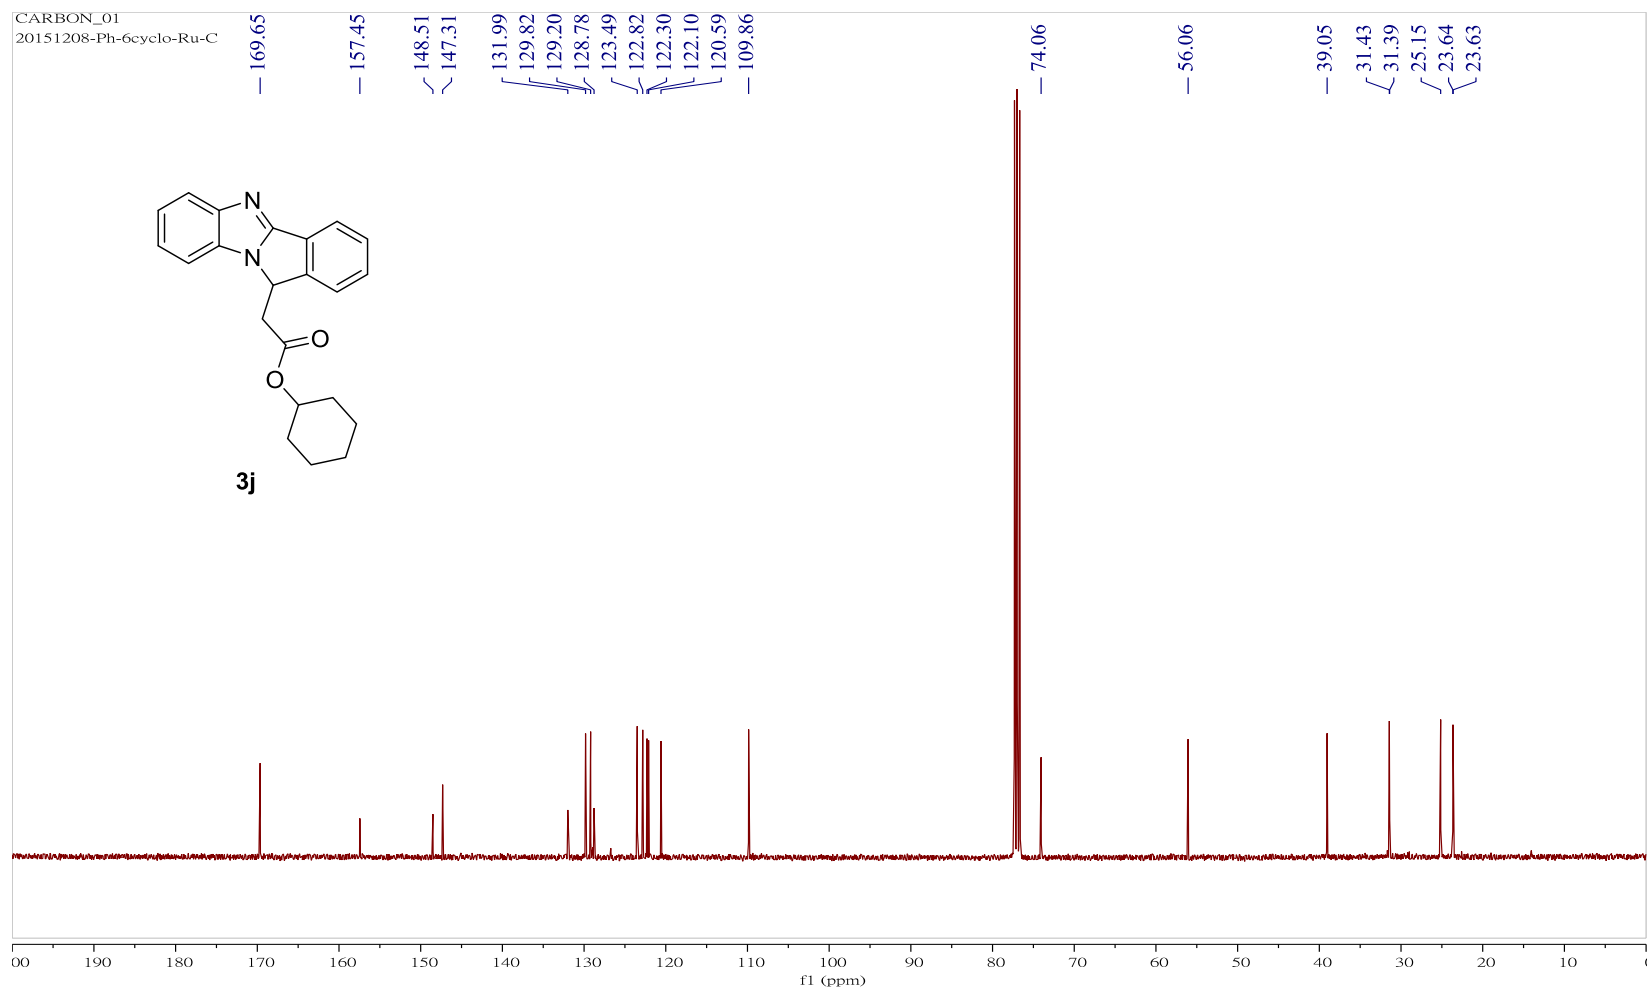

$^{13}\text{C}$  NMR Spectrum (100 MHz) of compound **3j** in  $\text{CDCl}_3$

**Ph-6cyclo-Ru**

20151211008 36 (2.466) Cn (Cen,3, 50.00, Ht); Sm (Mn, 2x0.75); Sb (3,50.00 ); Cm (33:40-2:9)

Scan ES+  
9.01e7

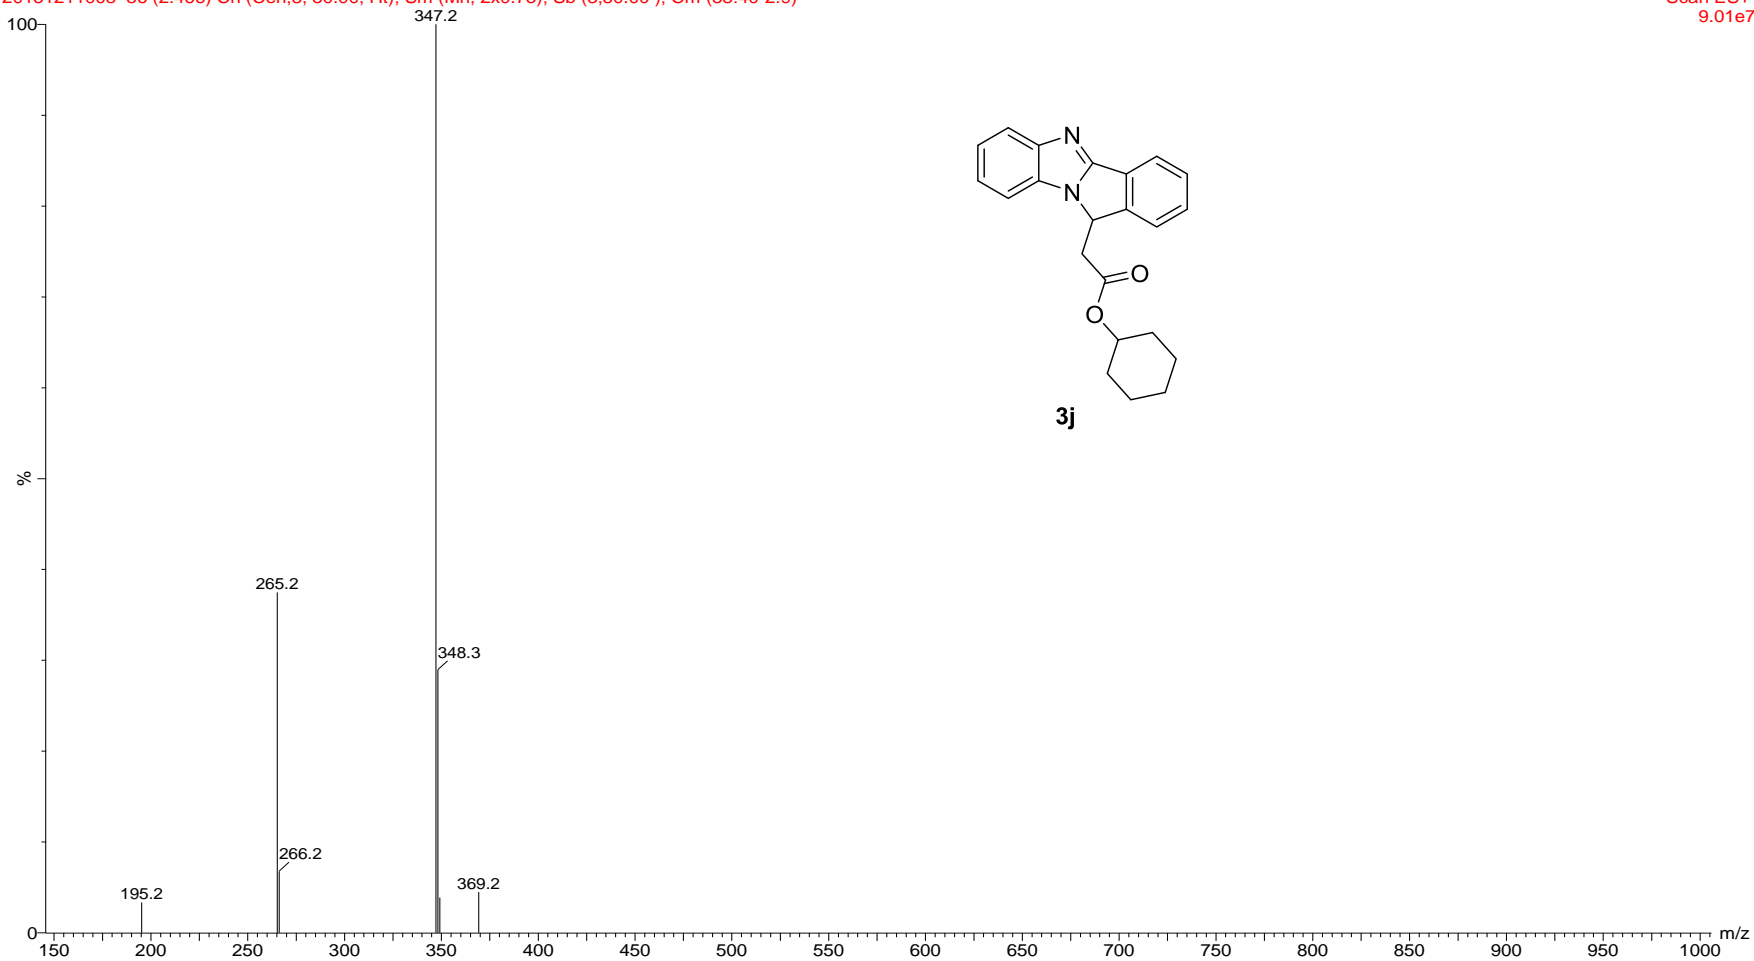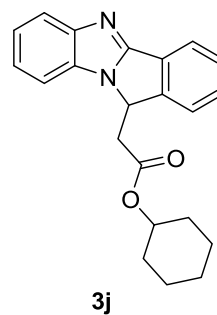

ESI<sup>+</sup> Mass spectrum of compound **3j**



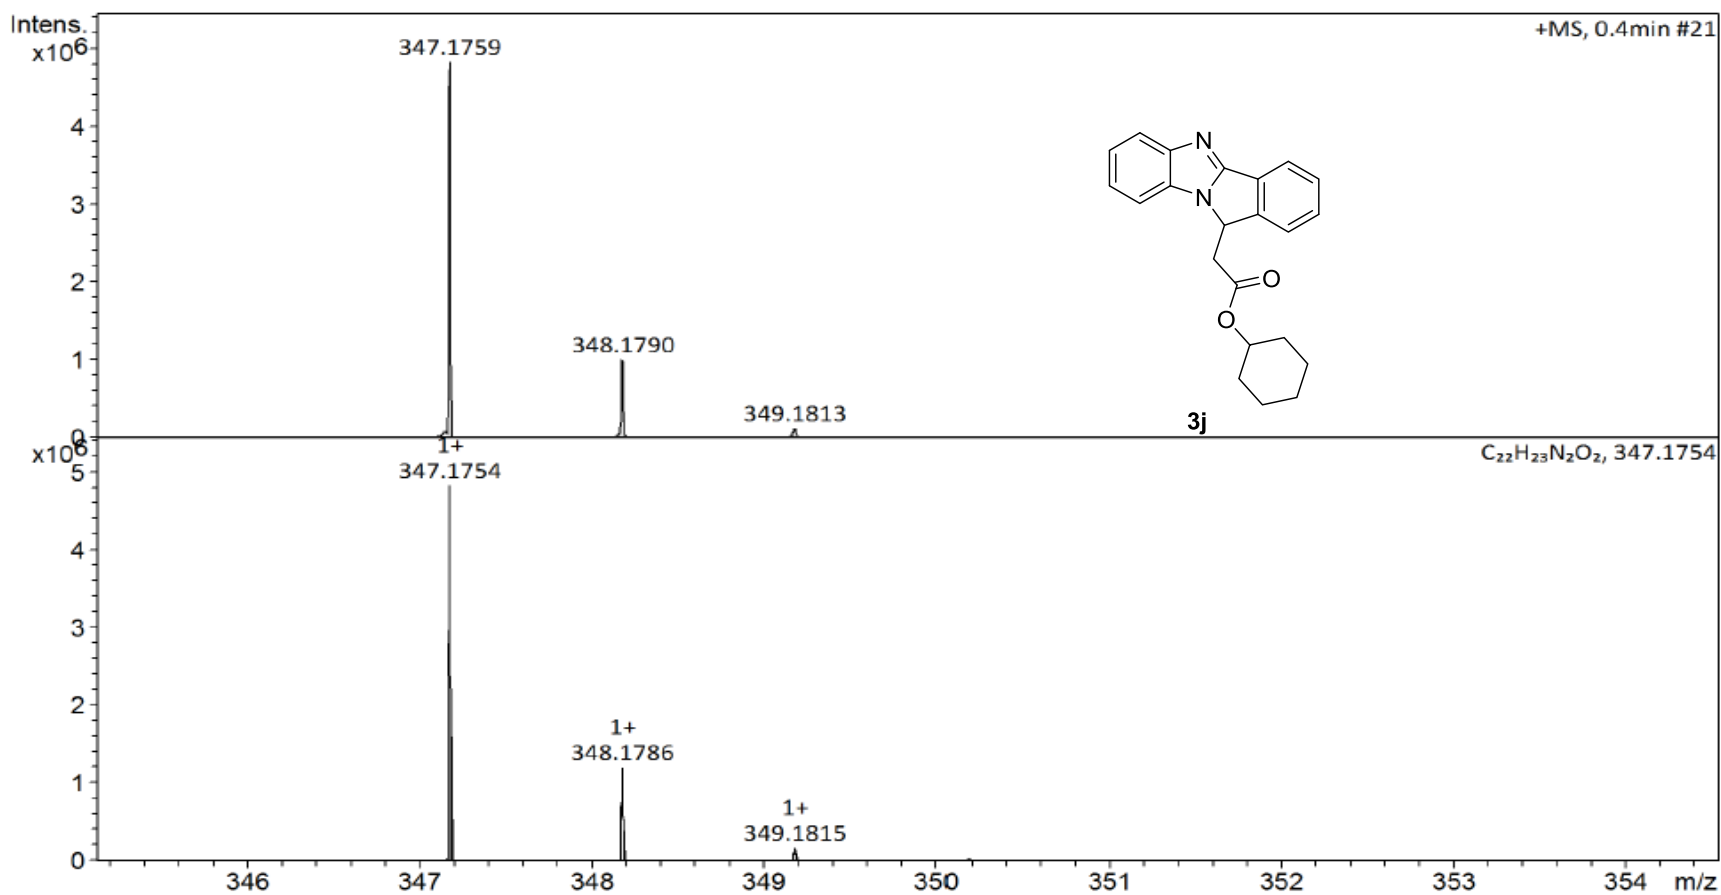

| Meas. m/z | # | Ion Formula                                                   | m/z      | err [ppm] | mSigma | # Sigma | Score  | rdb  | e <sup>-</sup> Conf | N-Rule | Adduct |
|-----------|---|---------------------------------------------------------------|----------|-----------|--------|---------|--------|------|---------------------|--------|--------|
| 347.1759  | 1 | C <sub>22</sub> H <sub>23</sub> N <sub>2</sub> O <sub>2</sub> | 347.1754 | 1.5       | 24.5   | 1       | 100.00 | 12.5 | even                | ok     | M+H    |

High resolution mass (ESI)<sup>+</sup> spectrum of compound of **3j**

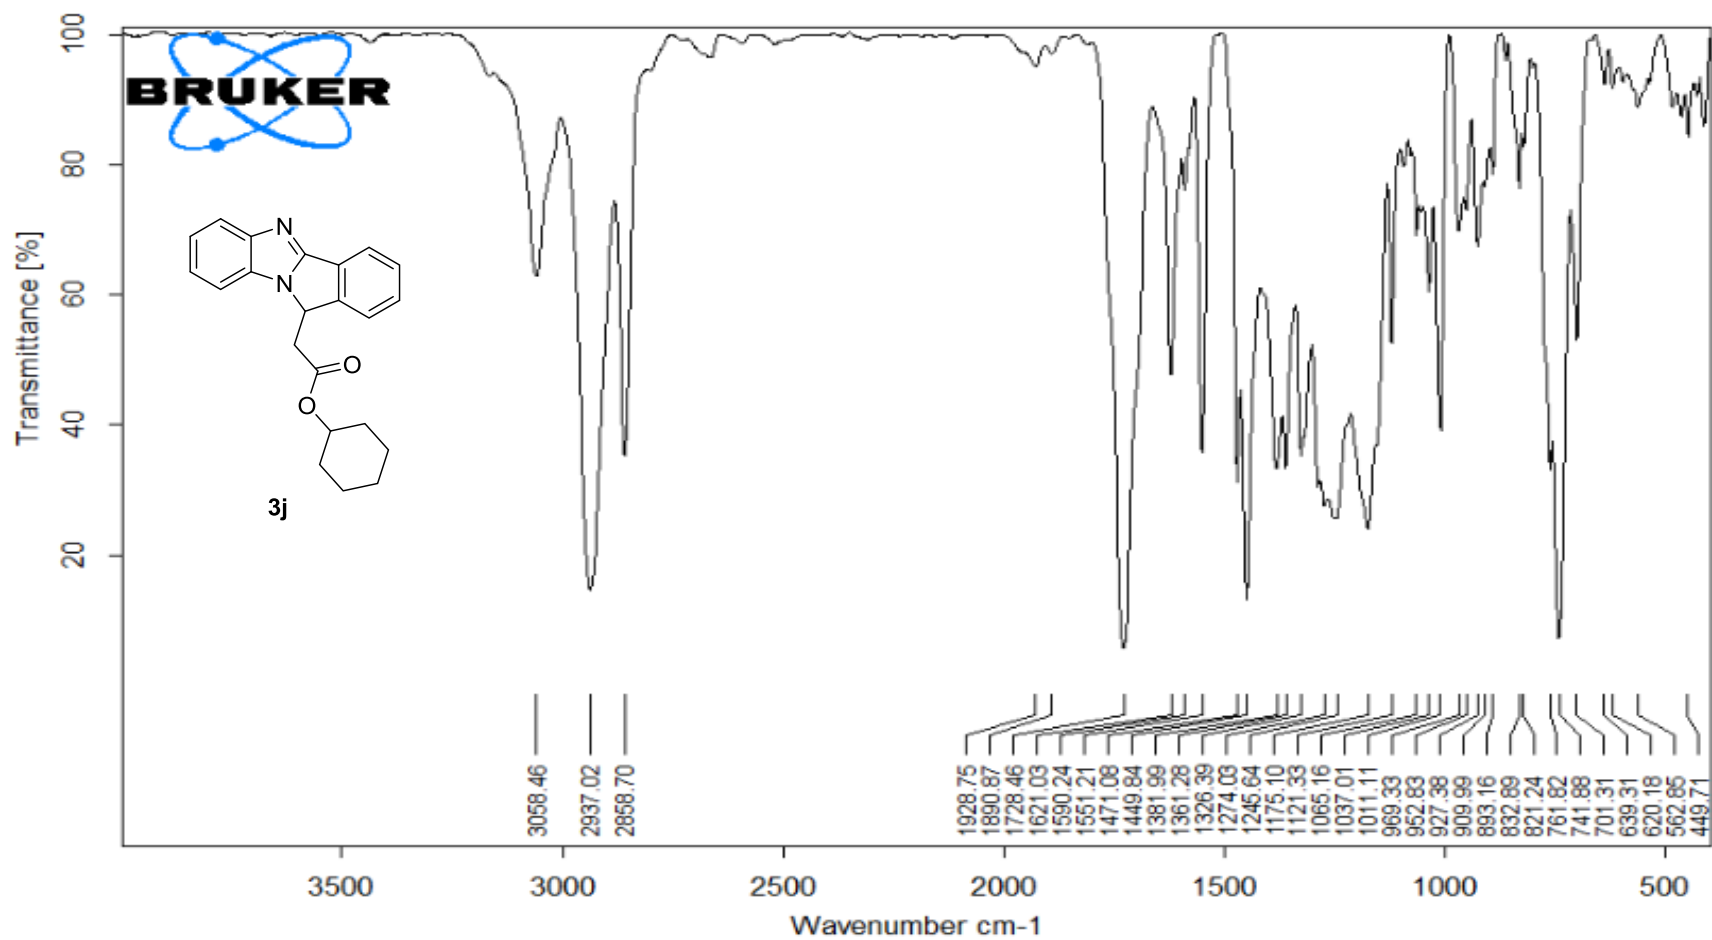

IR spectrum of compound of 3j

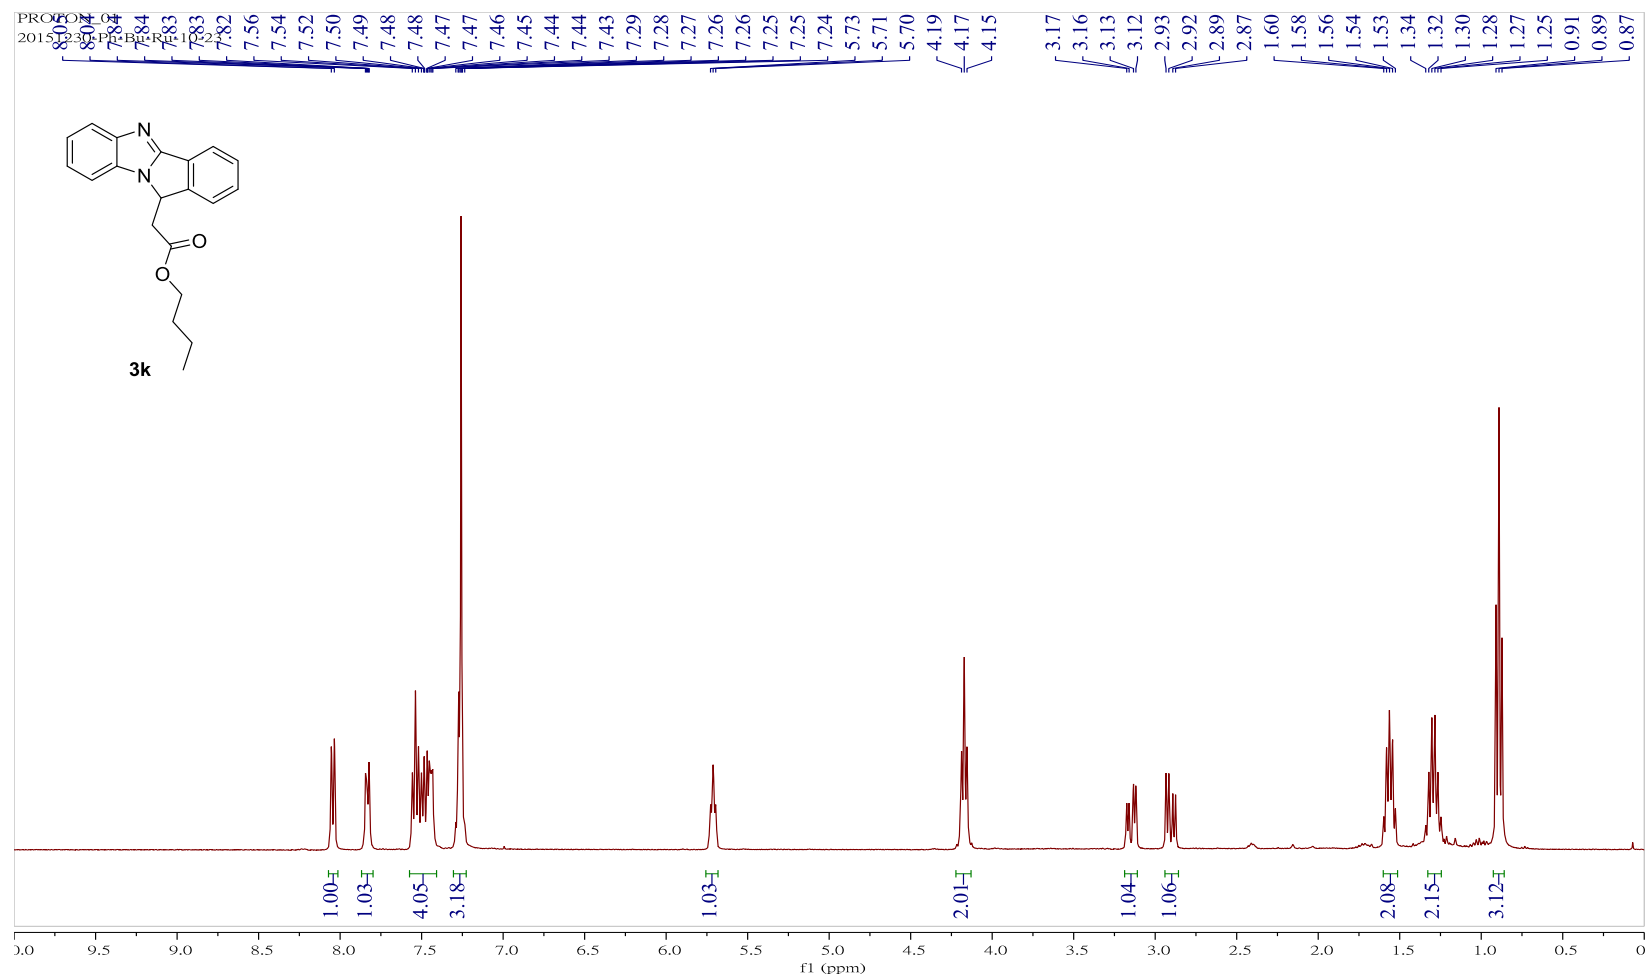

$^1\text{H}$  NMR Spectrum (400 MHz) of compound **3k** in  $\text{CDCl}_3$

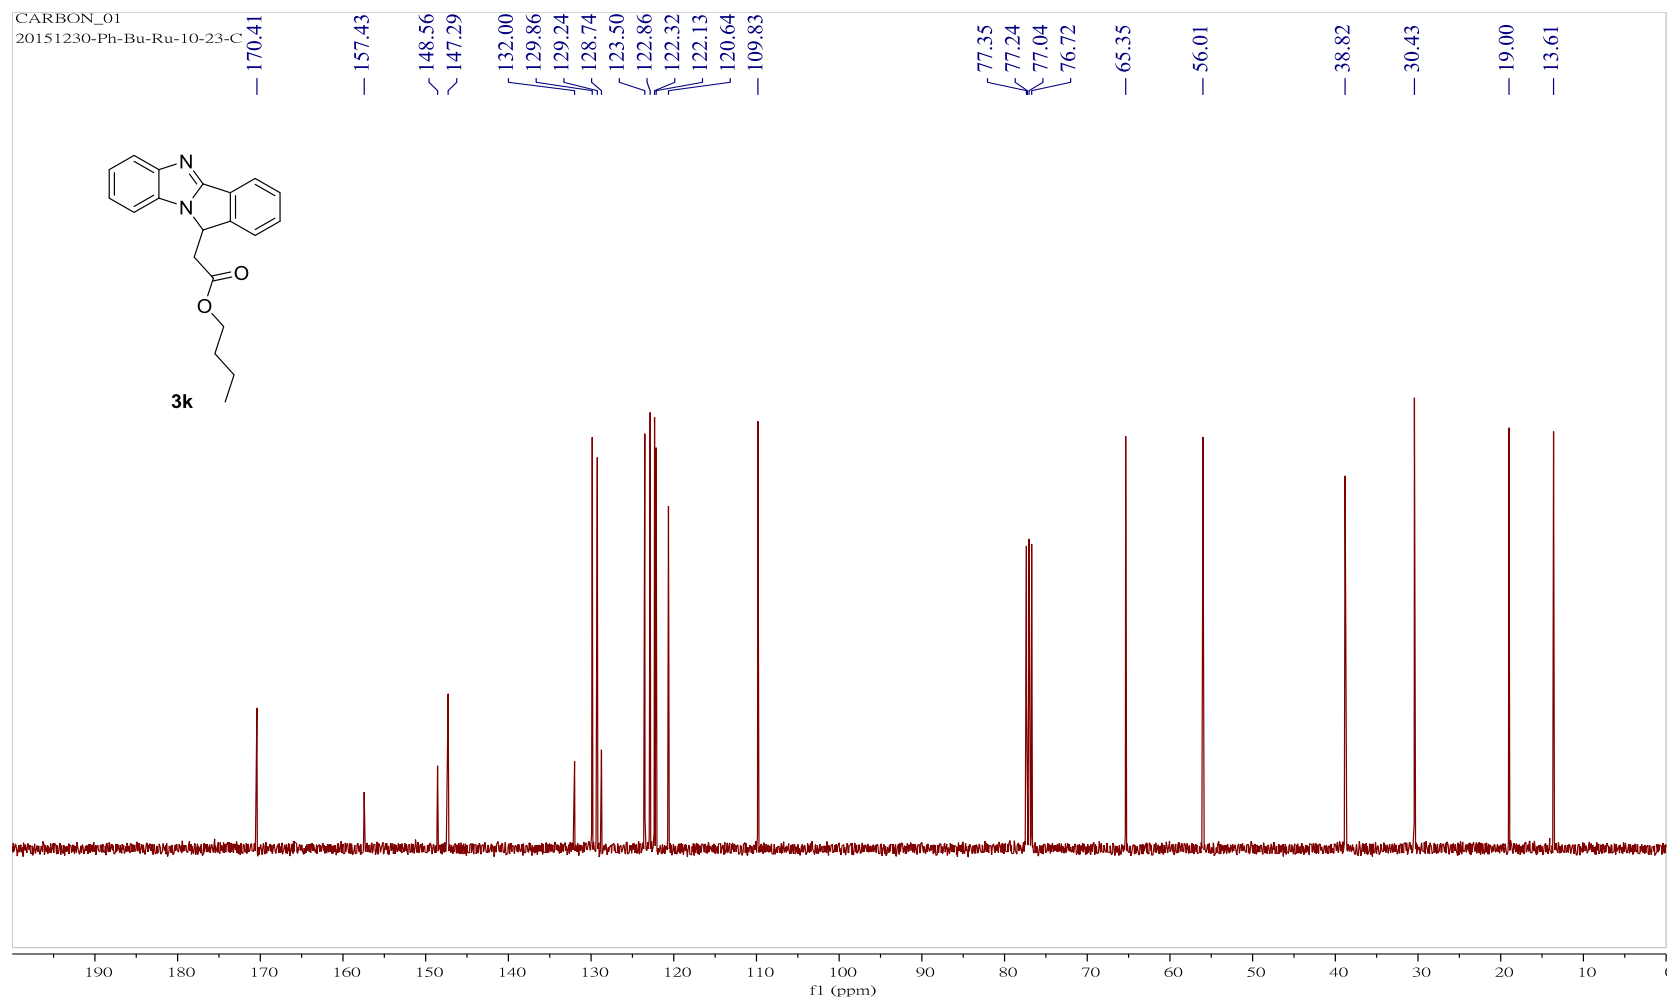

$^{13}\text{C}$  NMR Spectrum (100 MHz) of compound **3k** in  $\text{CDCl}_3$

**Ph-Bu-Ru**

201601050012 28 (1.918) Cn (Cen,3, 50.00, Ht); Sm (Mn, 2x0.75); Sb (3,50.00); Cm (26:35-2:7)

Scan ES+  
8.14e7

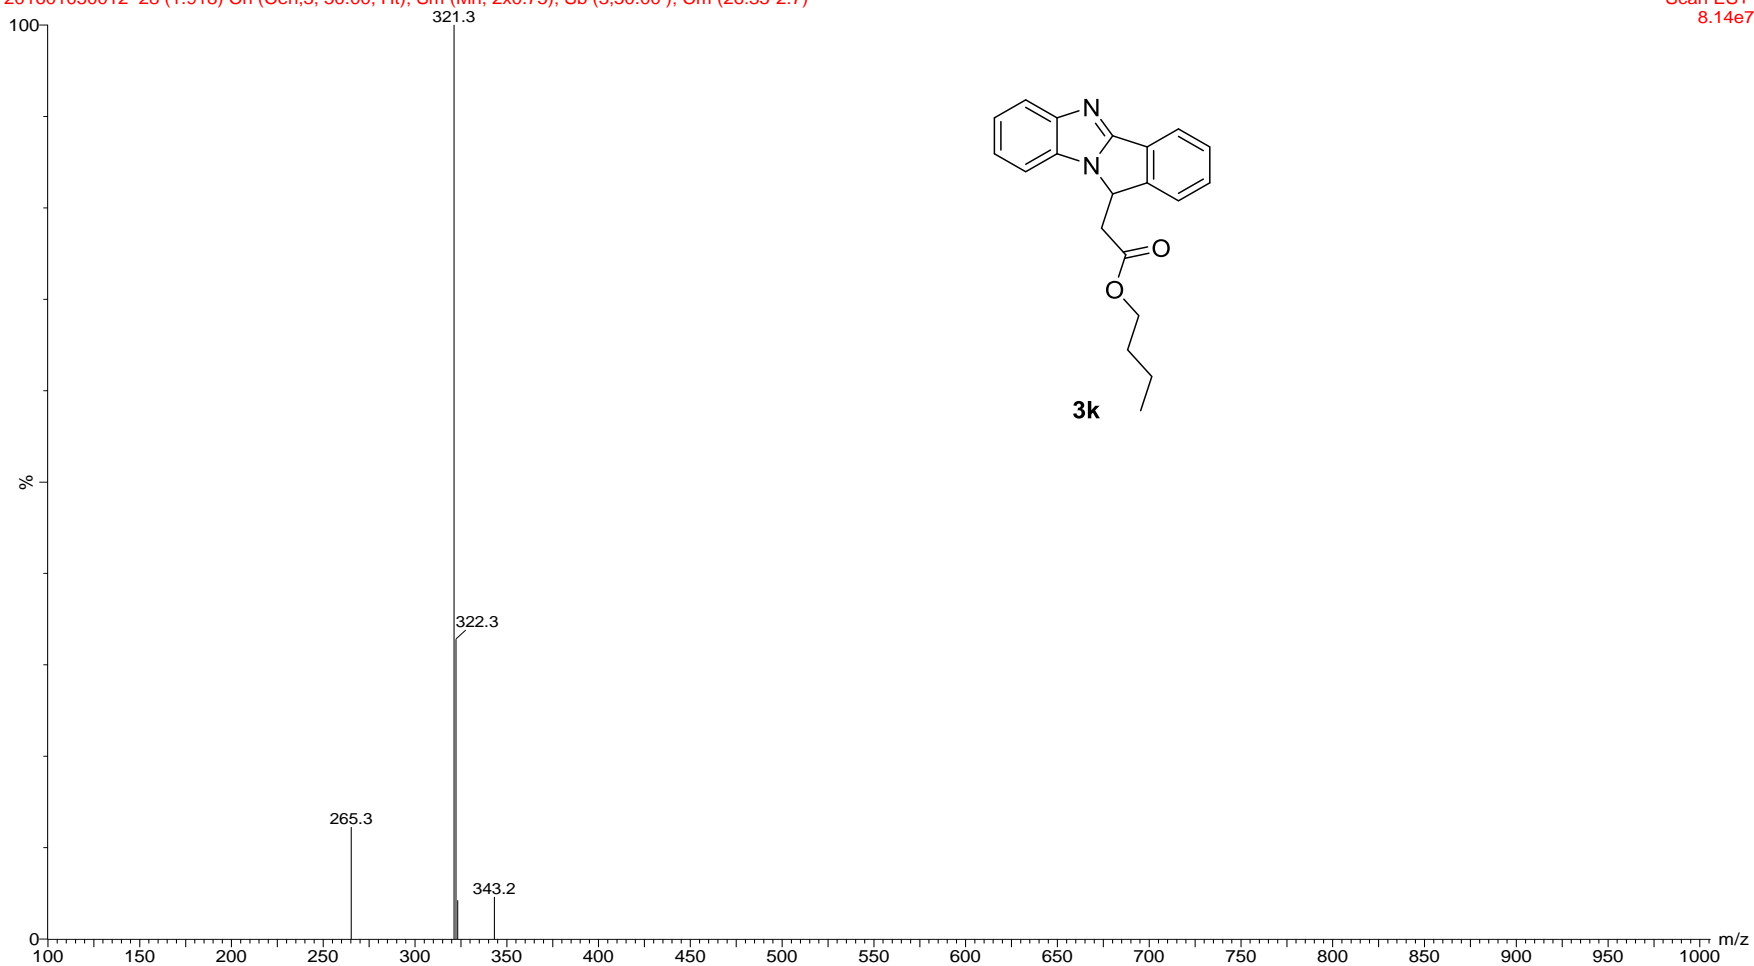

ESI<sup>+</sup> Mass spectrum of compound **3k**



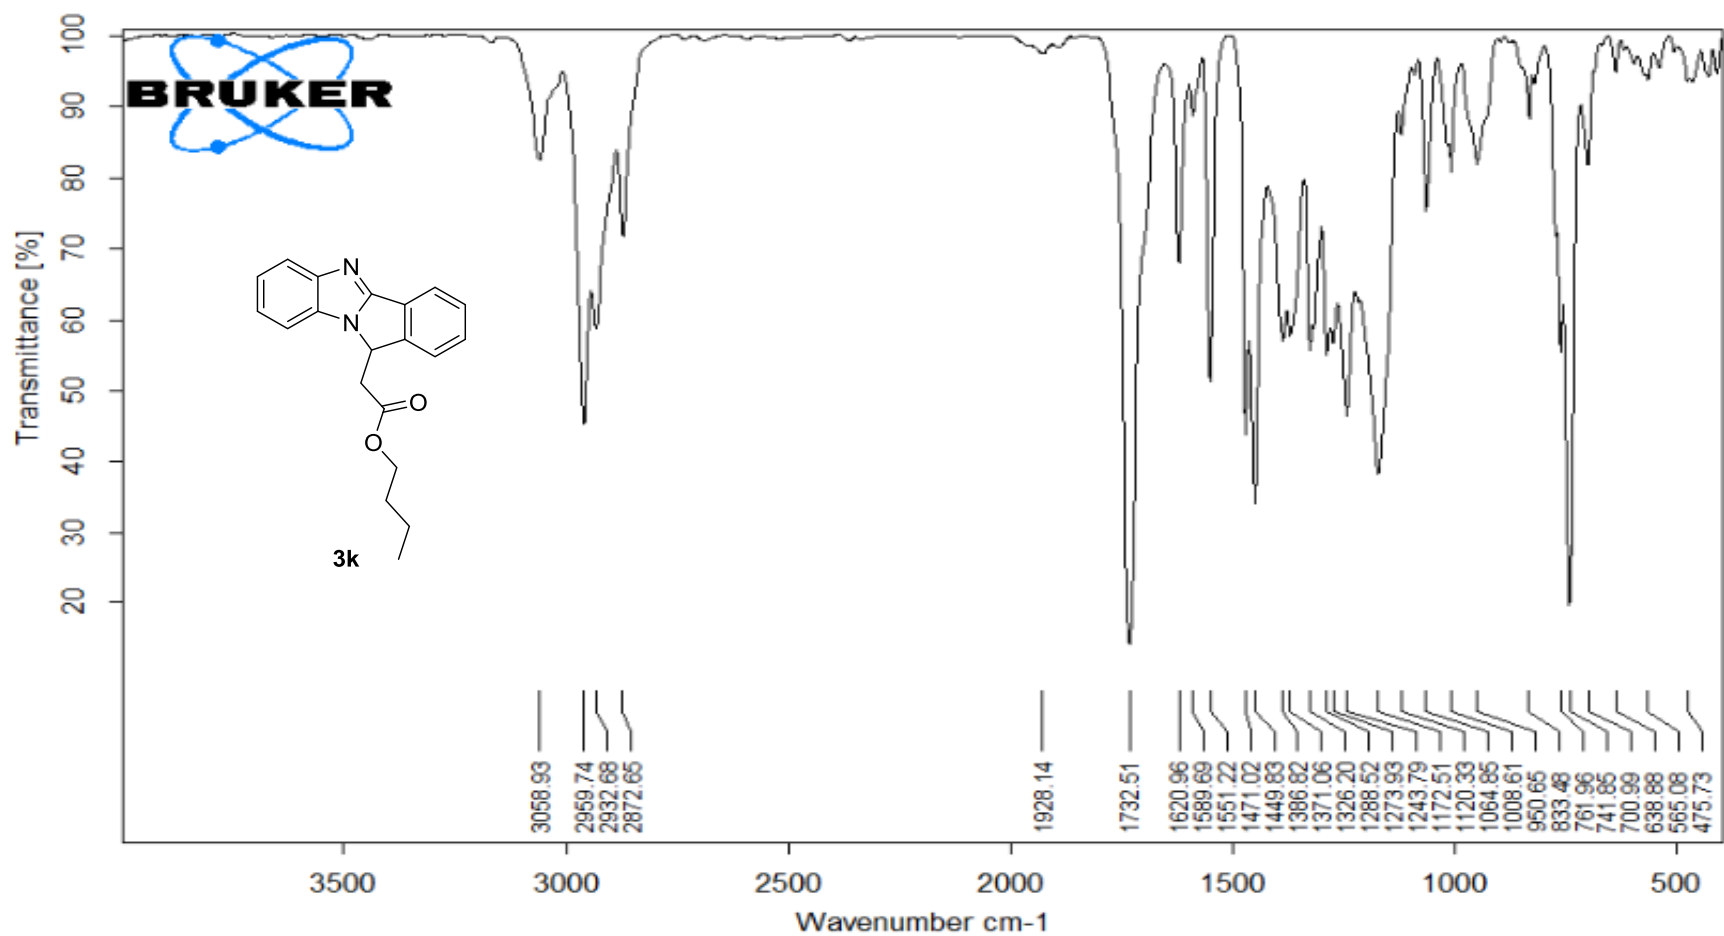

IR spectrum of compound of **3k**

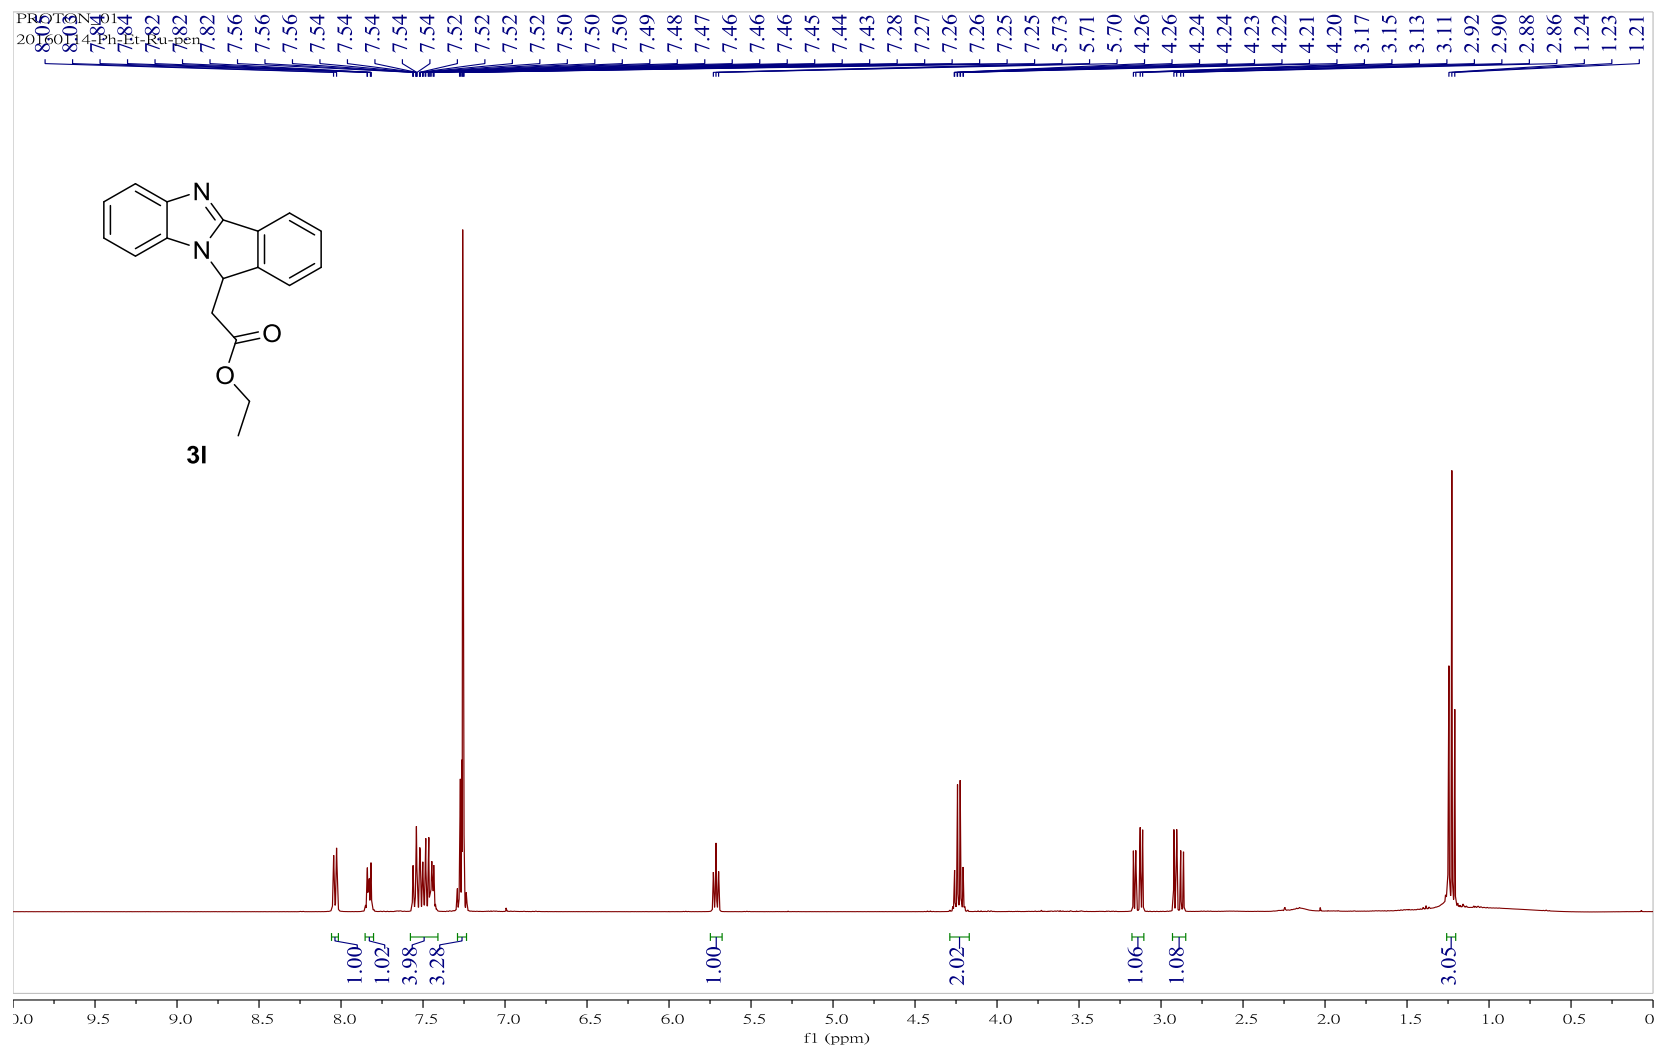

<sup>1</sup>H NMR Spectrum (400 MHz) of compound **31** in CDCl<sub>3</sub>



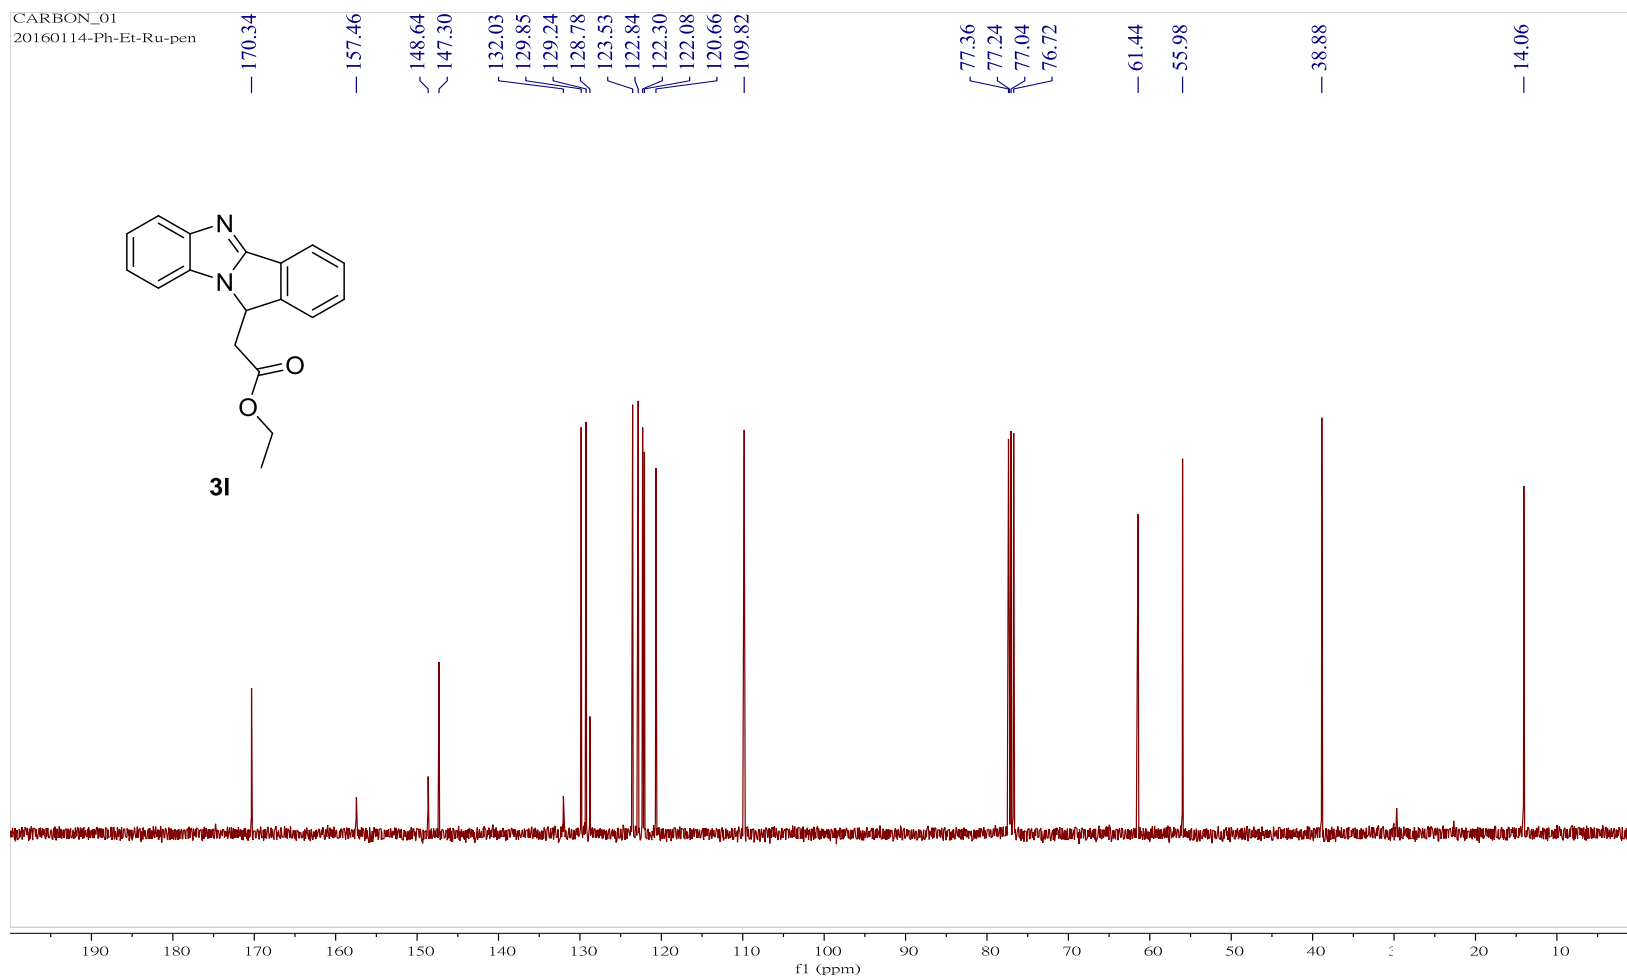

$^{13}\text{C}$  NMR Spectrum (100 MHz) of compound **31** in  $\text{CDCl}_3$

Ph-Et-Ru

201601150019 15 (1.027) Cn (Cen,3, 50.00, Ht); Sm (Mn, 2x0.75); Sb (3,50.00); Cm (13:19-5:10)

Scan ES+  
6.73e7

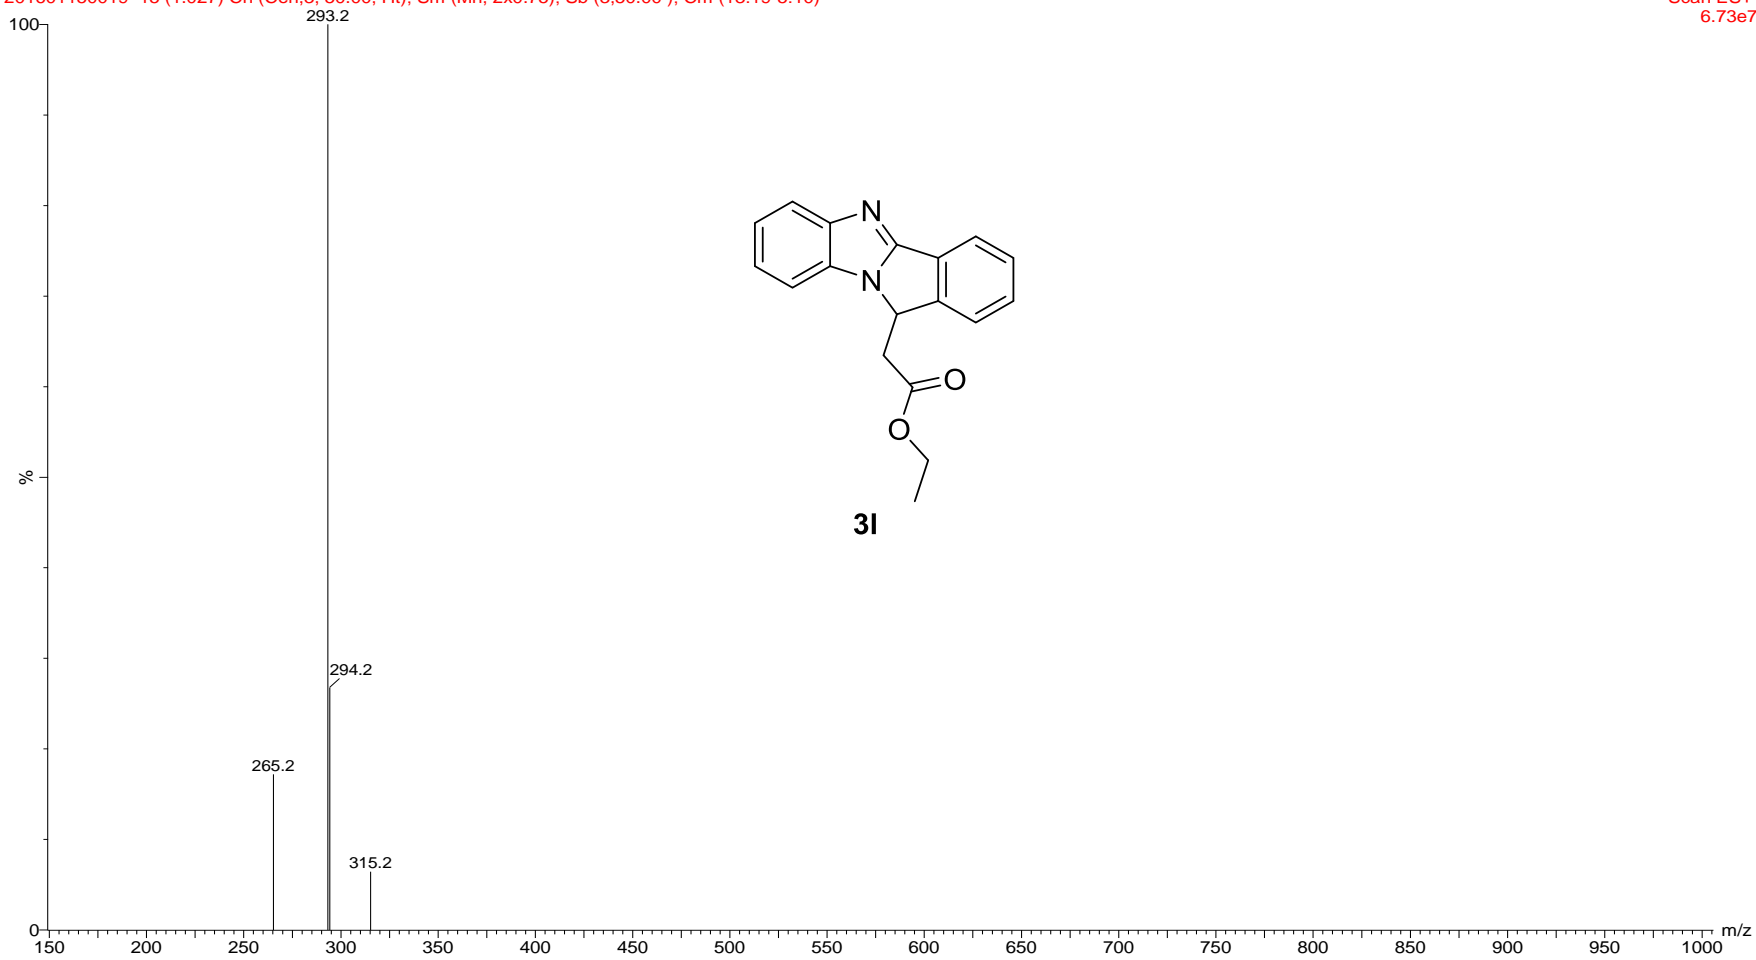

ESI<sup>+</sup> Mass spectrum of compound **31**

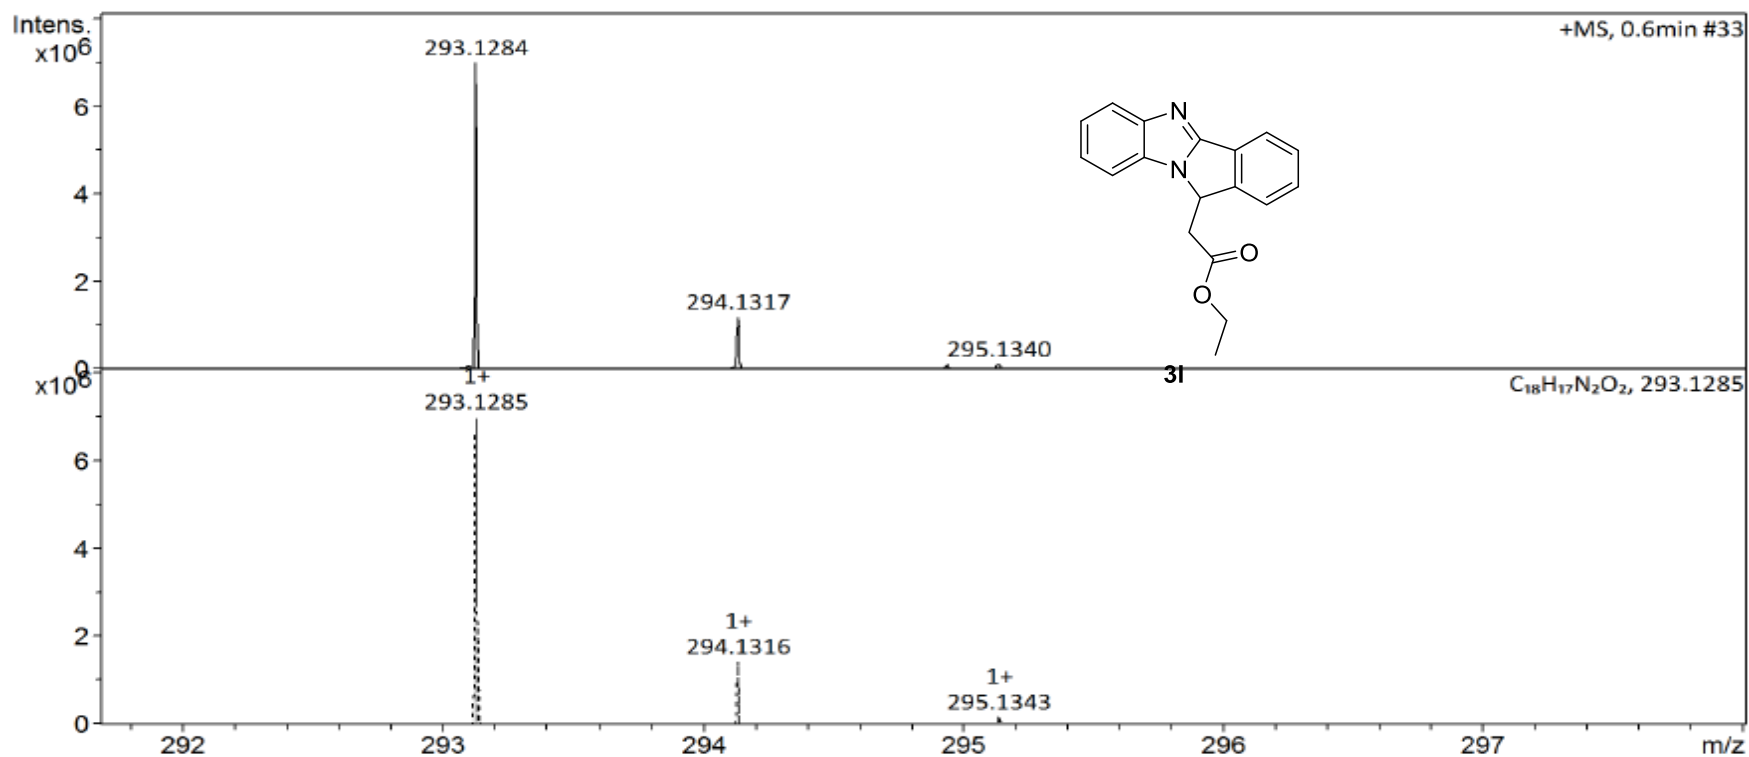

| Meas. m/z | # | Ion Formula                                                   | m/z      | err [ppm] | mSigma | # Sigma | Score  | rdb  | e <sup>-</sup> Conf | N-Rule | Adduct |
|-----------|---|---------------------------------------------------------------|----------|-----------|--------|---------|--------|------|---------------------|--------|--------|
| 293.1284  | 1 | C <sub>18</sub> H <sub>17</sub> N <sub>2</sub> O <sub>2</sub> | 293.1285 | 0.2       | 20.0   | 1       | 100.00 | 11.5 | even                | ok     | M+H    |

High resolution mass (ESI)<sup>+</sup> spectrum of compound of **31**

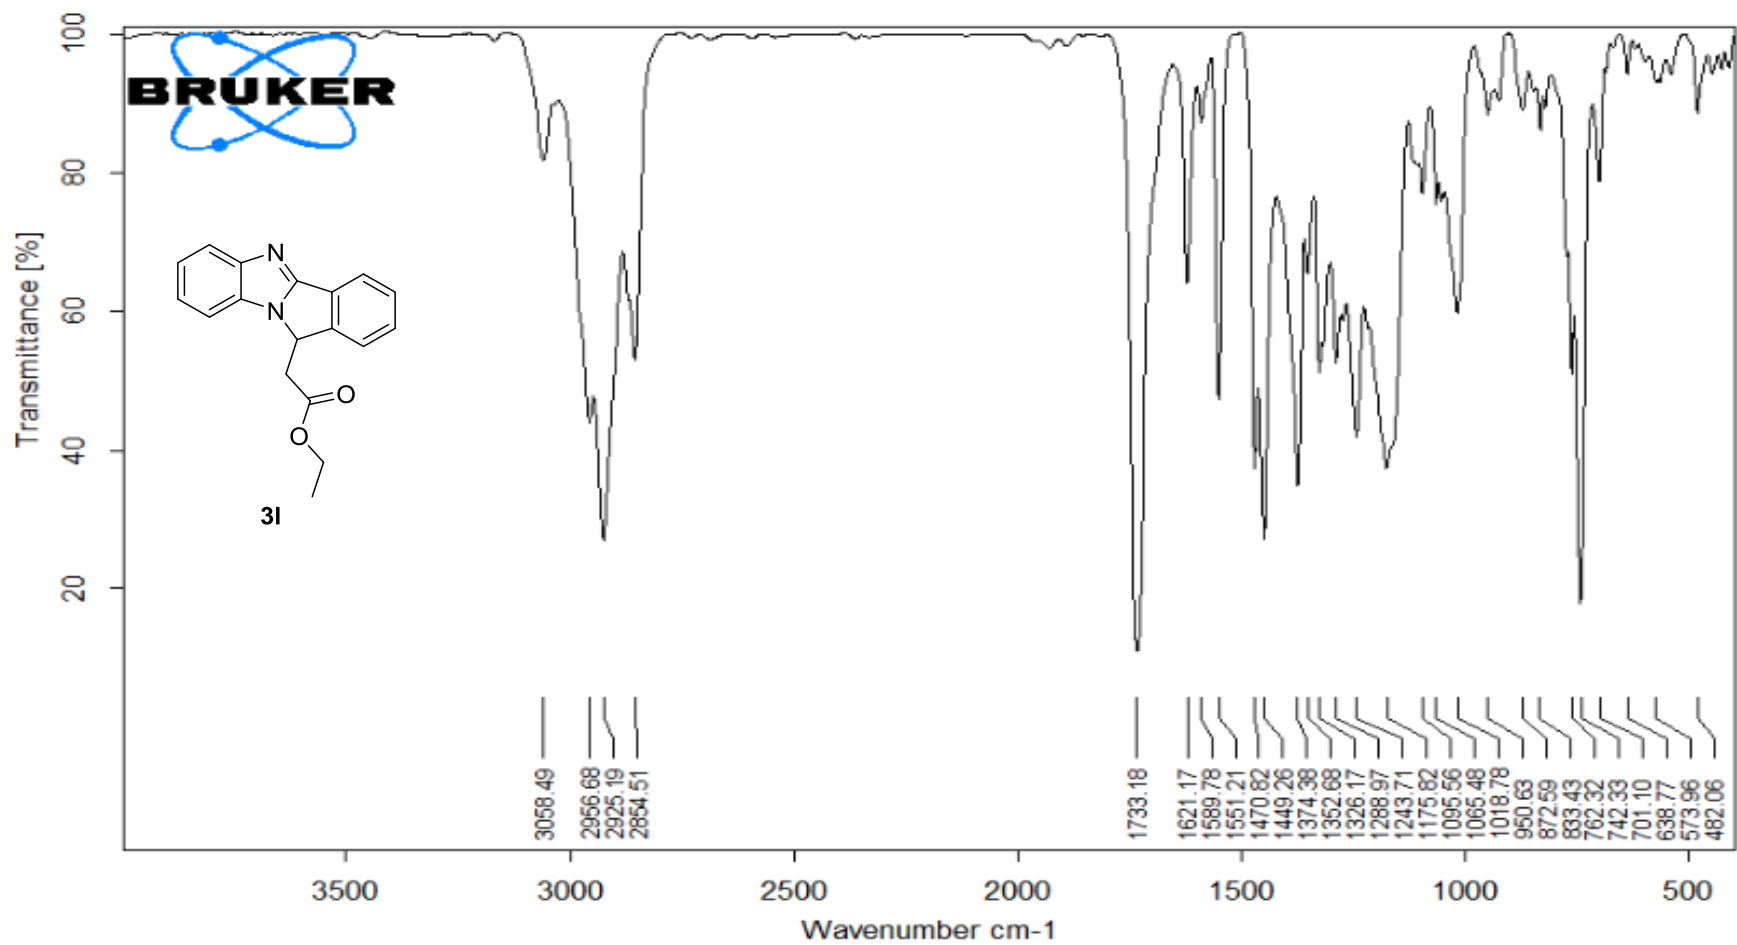

IR spectrum of compound of **31**

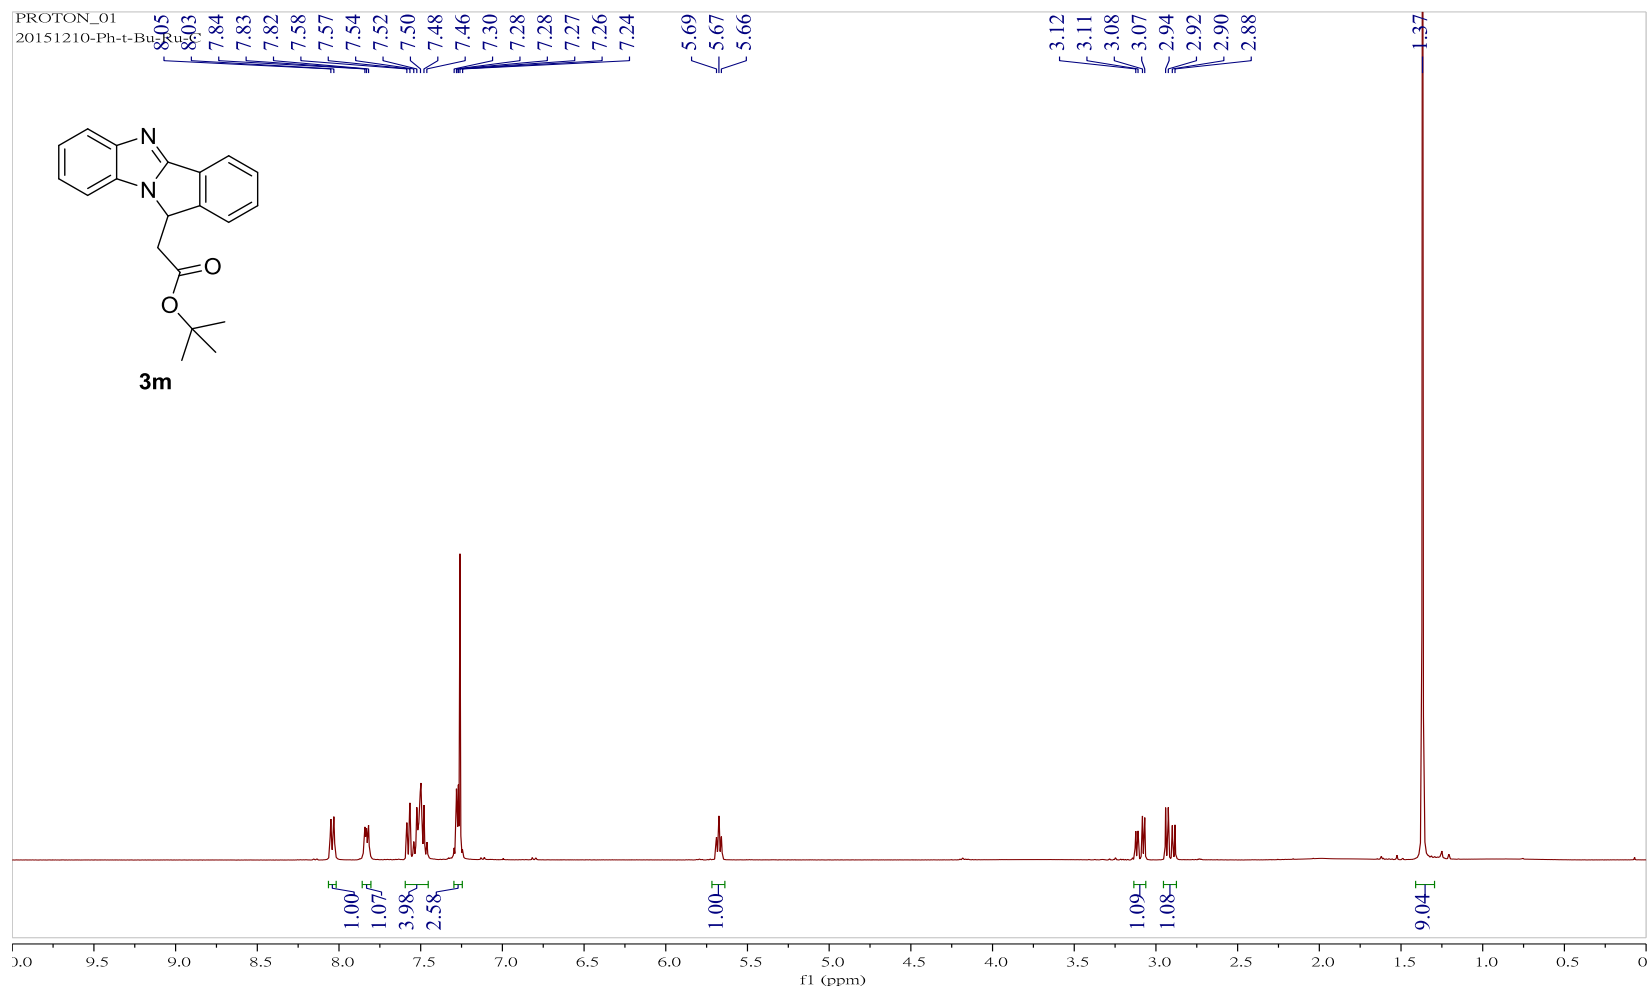

$^1\text{H}$  NMR Spectrum (400 MHz) of compound **3m** in  $\text{CDCl}_3$

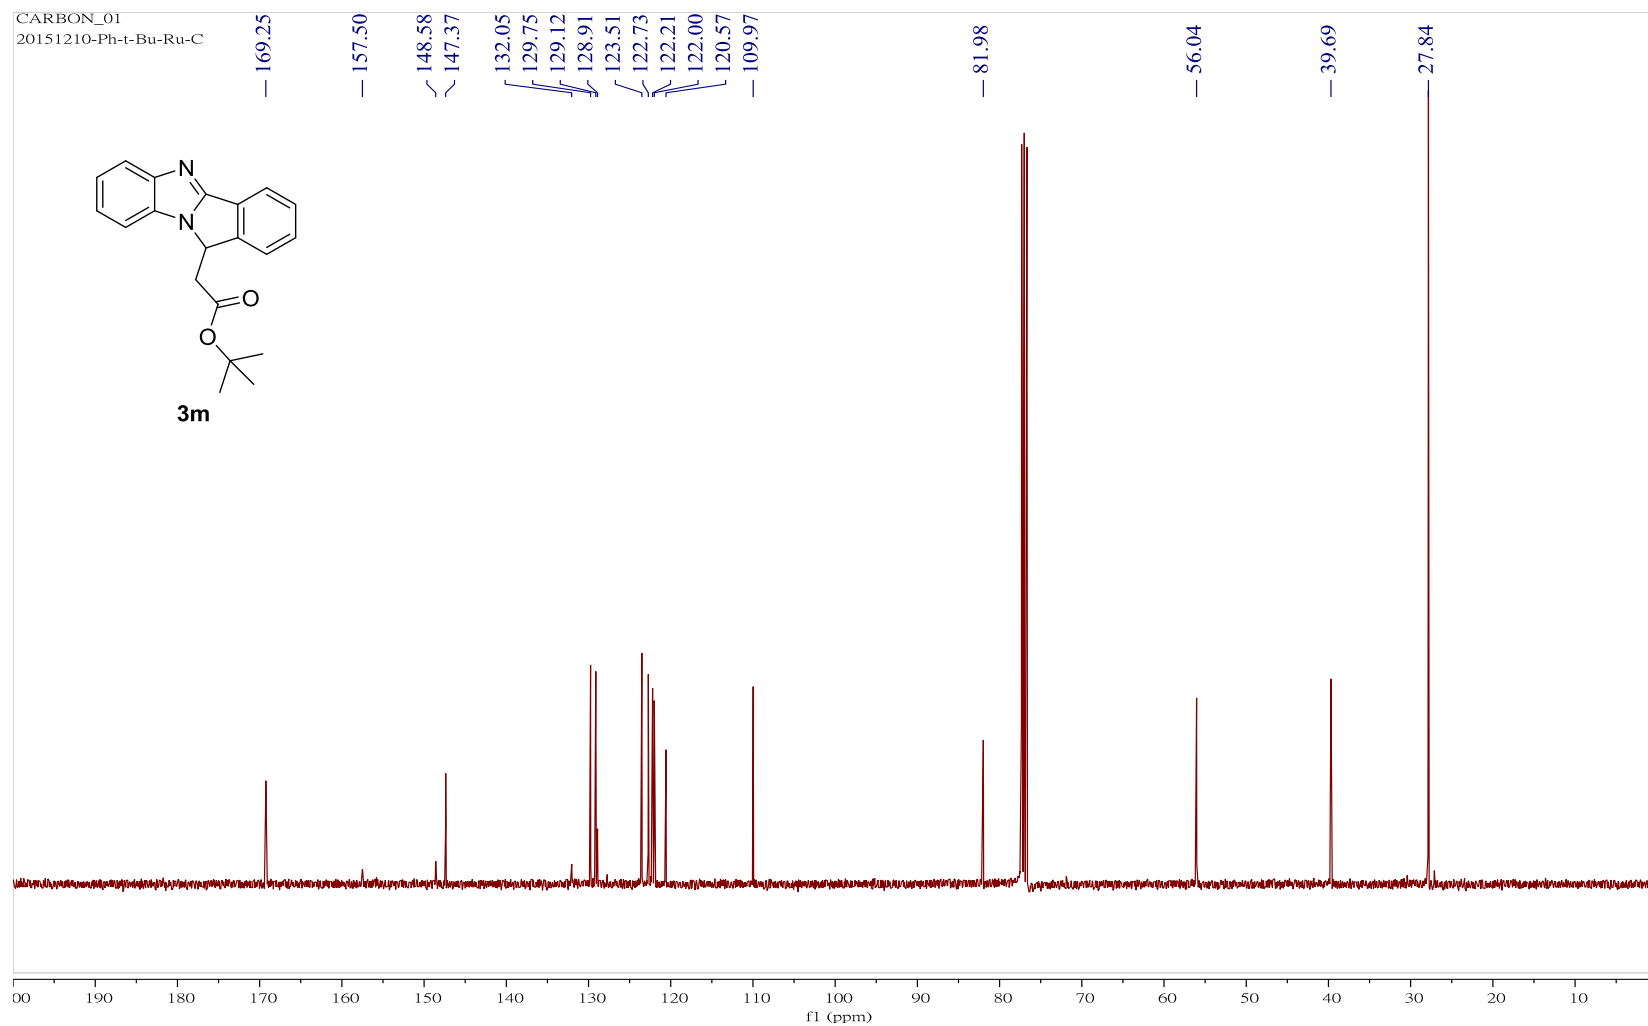

$^{13}\text{C}$  NMR Spectrum (100 MHz) of compound **3m** in  $\text{CDCl}_3$

Ph-t-Bu-Ru

201512110027 24 (1.644) Cn (Cen,3, 50.00, Ht); Sm (Mn, 2x0.75); Sb (3,50.00); Cm (24:30-2:9)

Scan ES+  
7.50e7

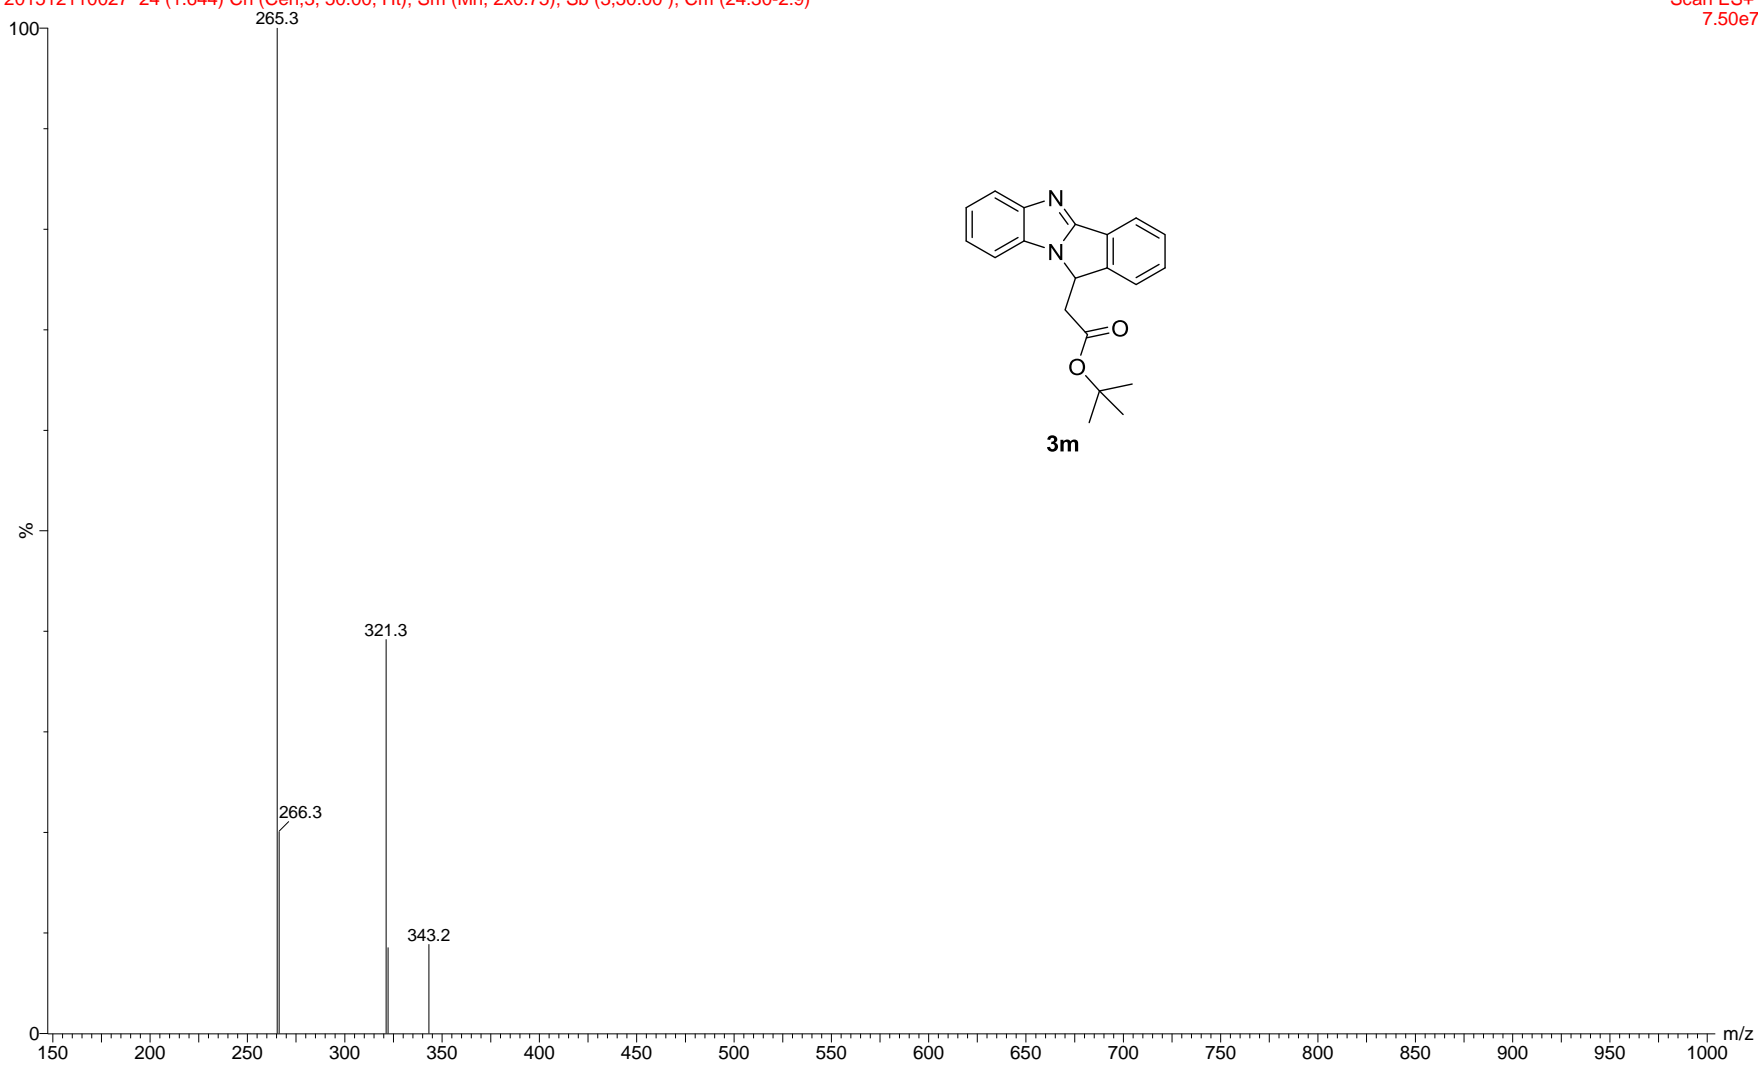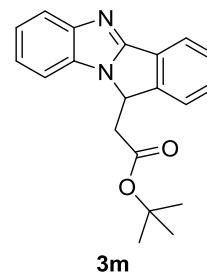

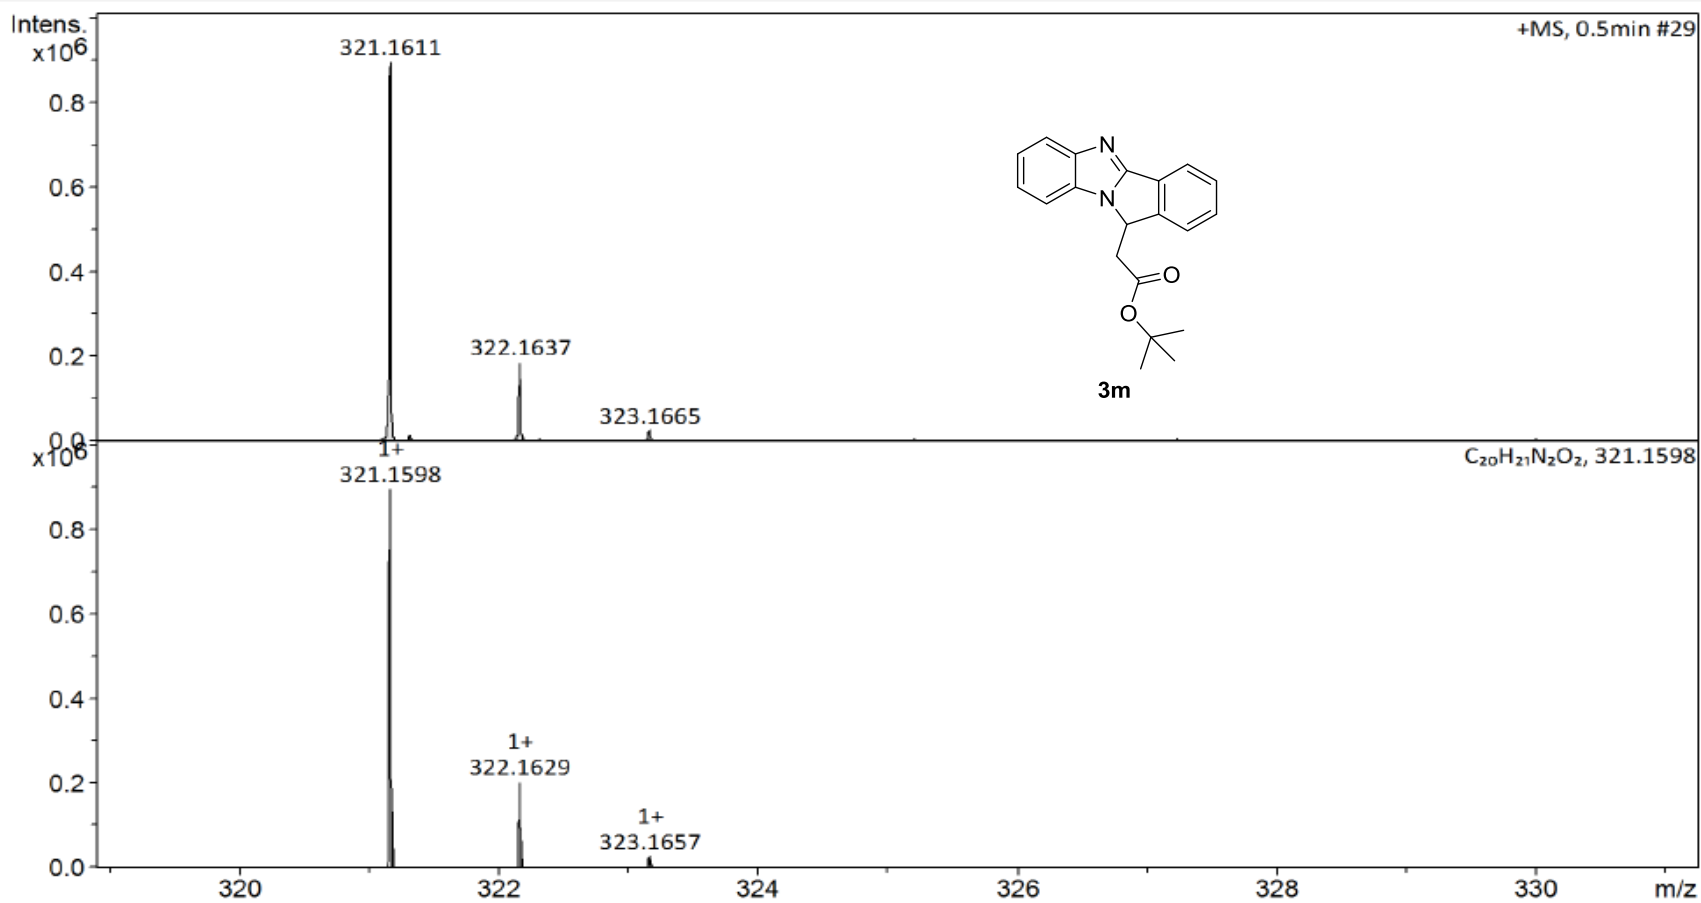

| Meas. m/z | # | Ion Formula                                                   | m/z      | err [ppm] | mSigma | # Sigma | Score  | rdb  | e <sup>-</sup> Conf | N-Rule | Adduct |
|-----------|---|---------------------------------------------------------------|----------|-----------|--------|---------|--------|------|---------------------|--------|--------|
| 321.1611  | 1 | C <sub>20</sub> H <sub>21</sub> N <sub>2</sub> O <sub>2</sub> | 321.1598 | 4.1       | 11.7   | 1       | 100.00 | 11.5 | even                | ok     | M+H    |

High resolution mass (ESI)<sup>+</sup> spectrum of compound of **3m**



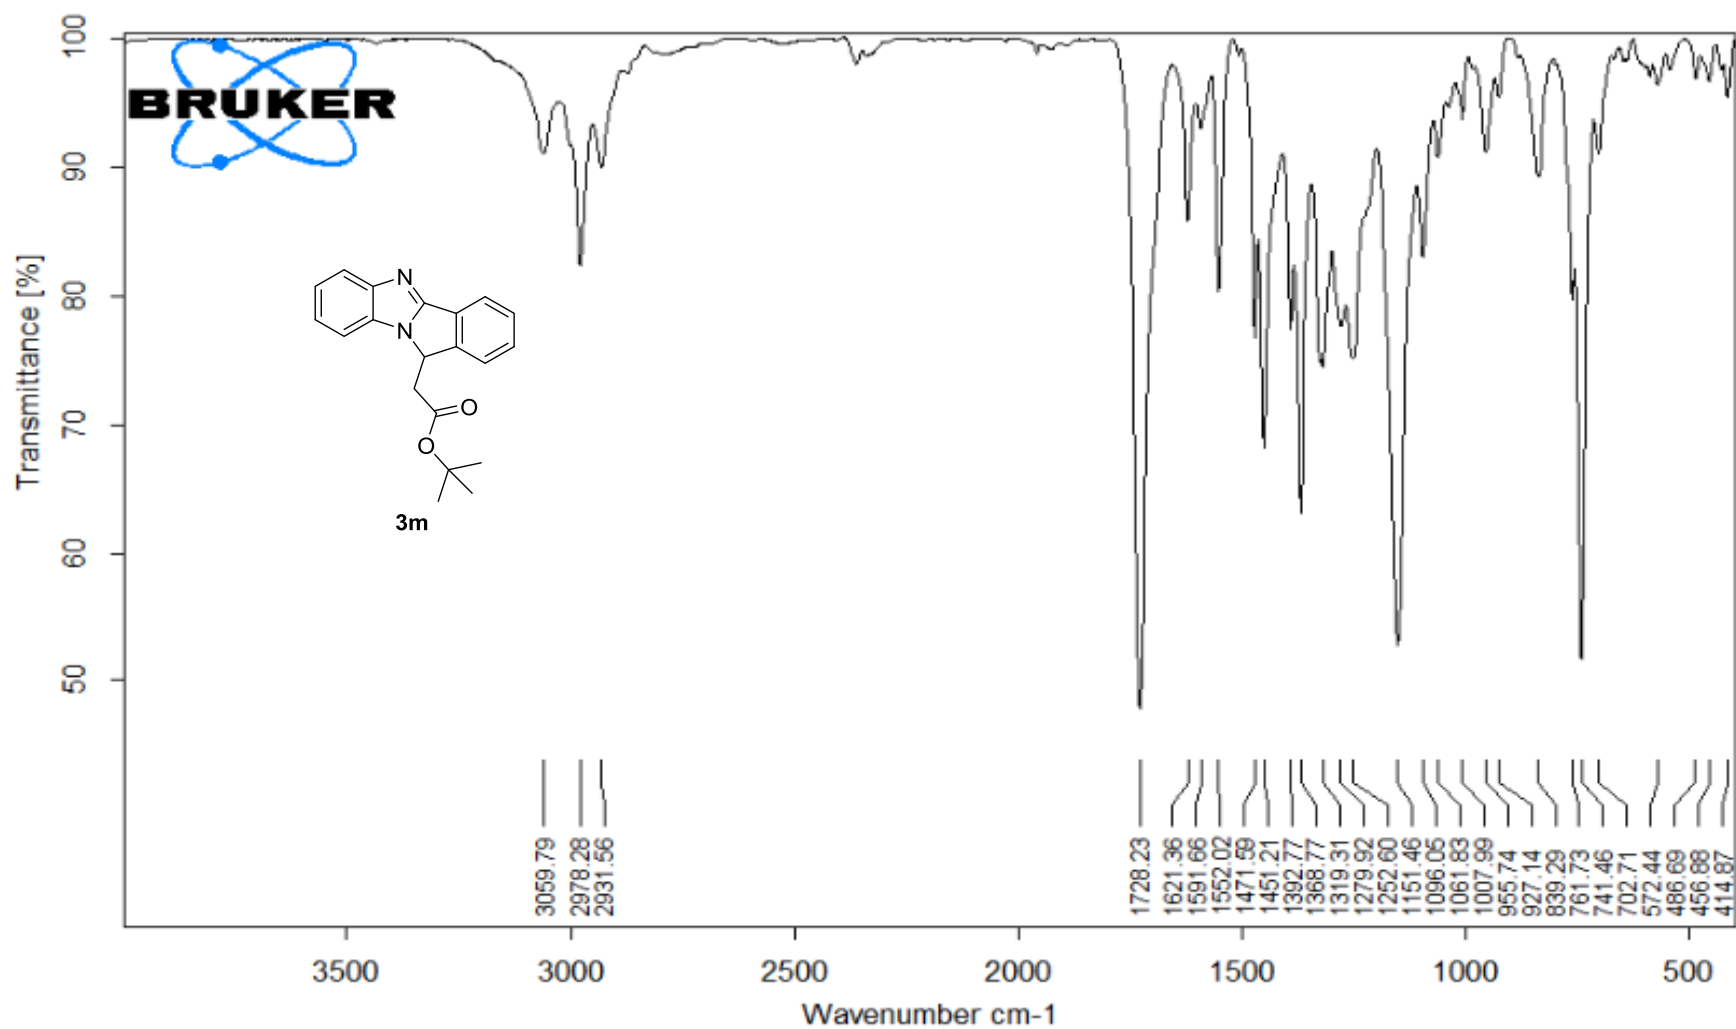

IR spectrum of compound of **3m**

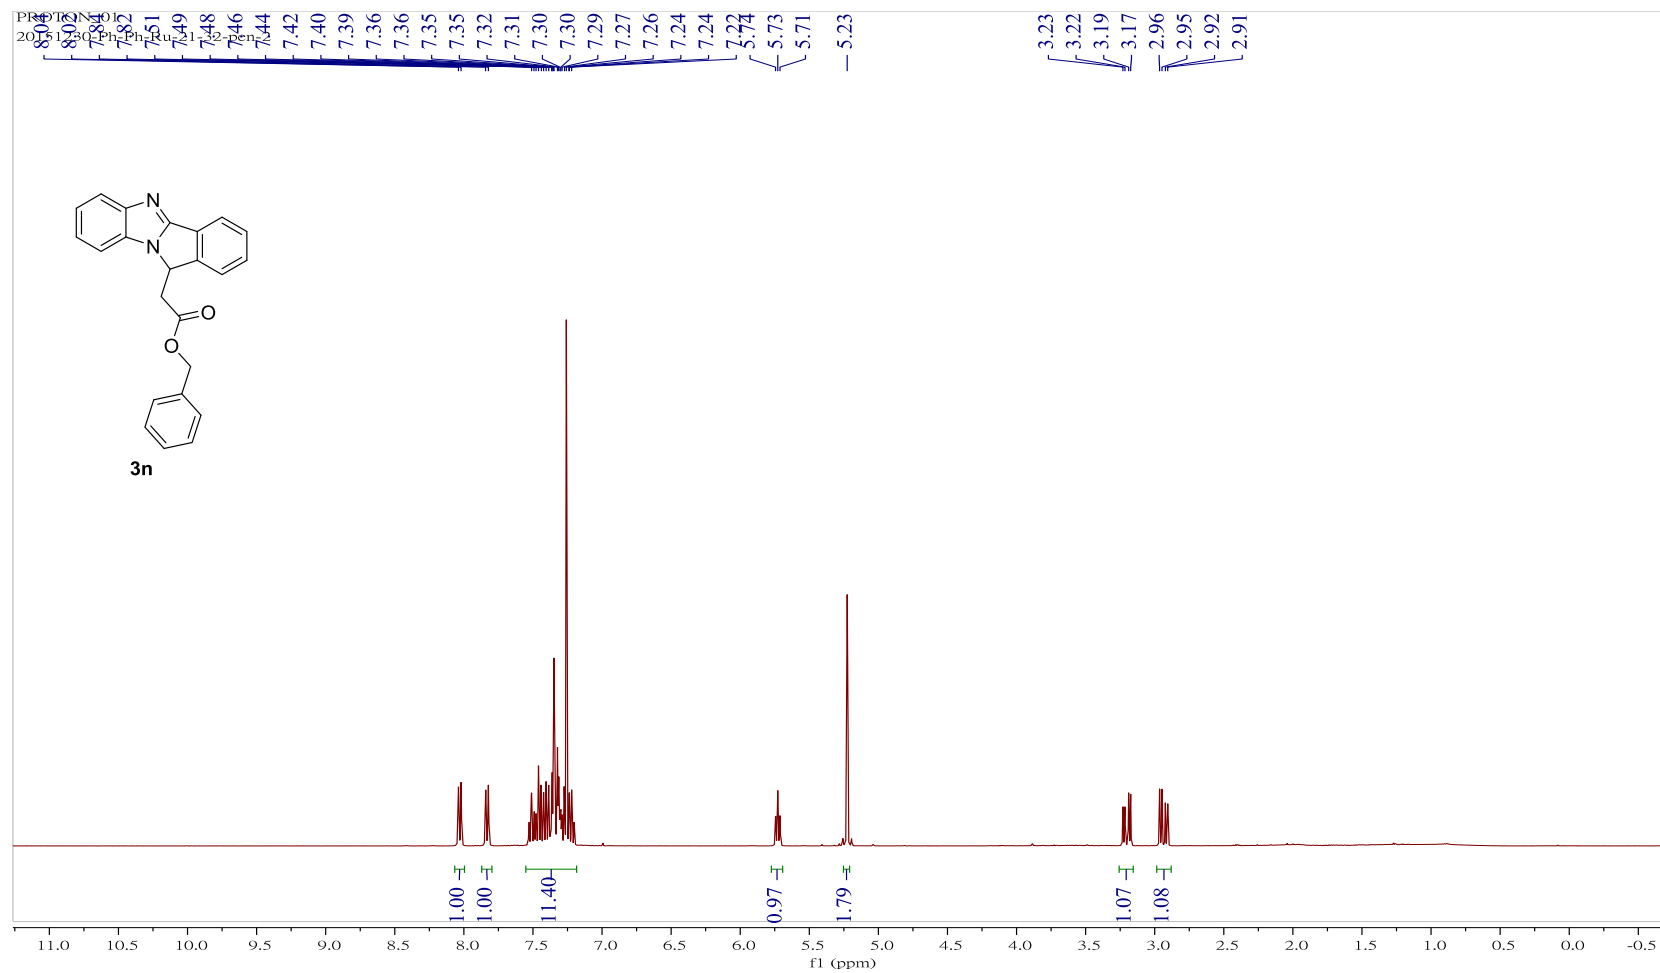

**<sup>1</sup>H NMR Spectrum (400 MHz) of compound 3n in CDCl<sub>3</sub>**

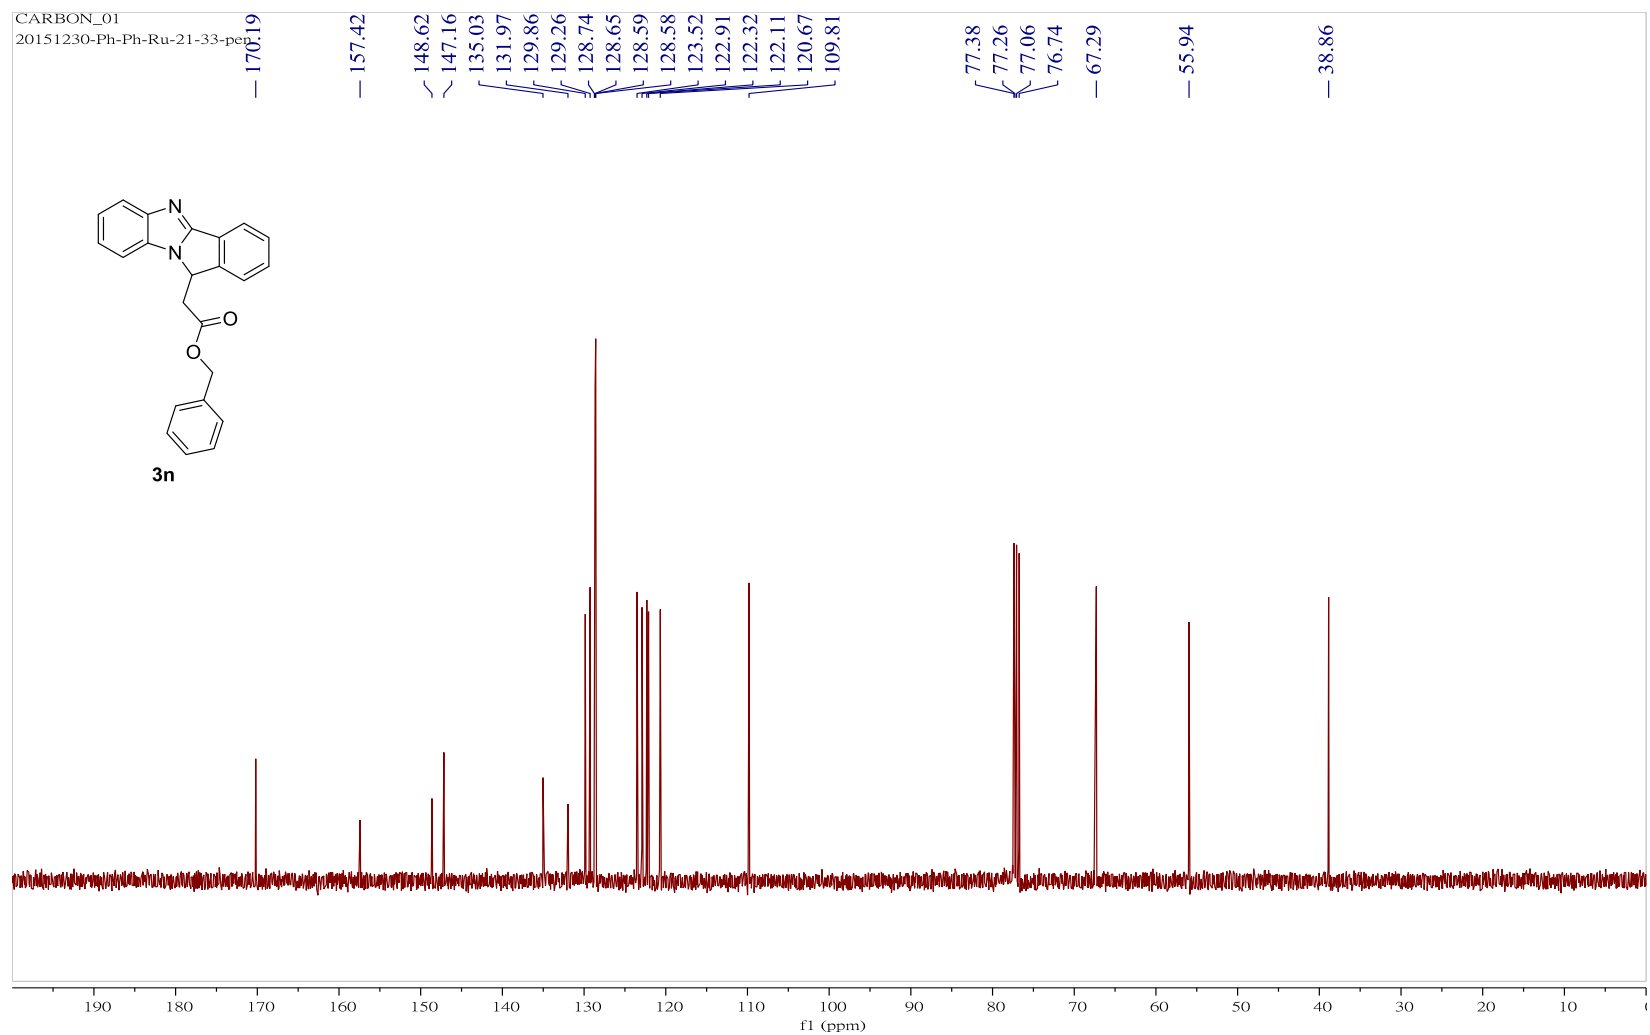

$^{13}\text{C}$  NMR Spectrum (100 MHz) of compound **3n** in  $\text{CDCl}_3$

ph-ph-Ru-2-21-32

201512290049 41 (2.808) Cn (Cen,3, 50.00, Ht); Sm (Mn, 2x0.75); Sb (3,50.00 ); Cm (39:50-2:5)

Scan ES+  
6.42e7

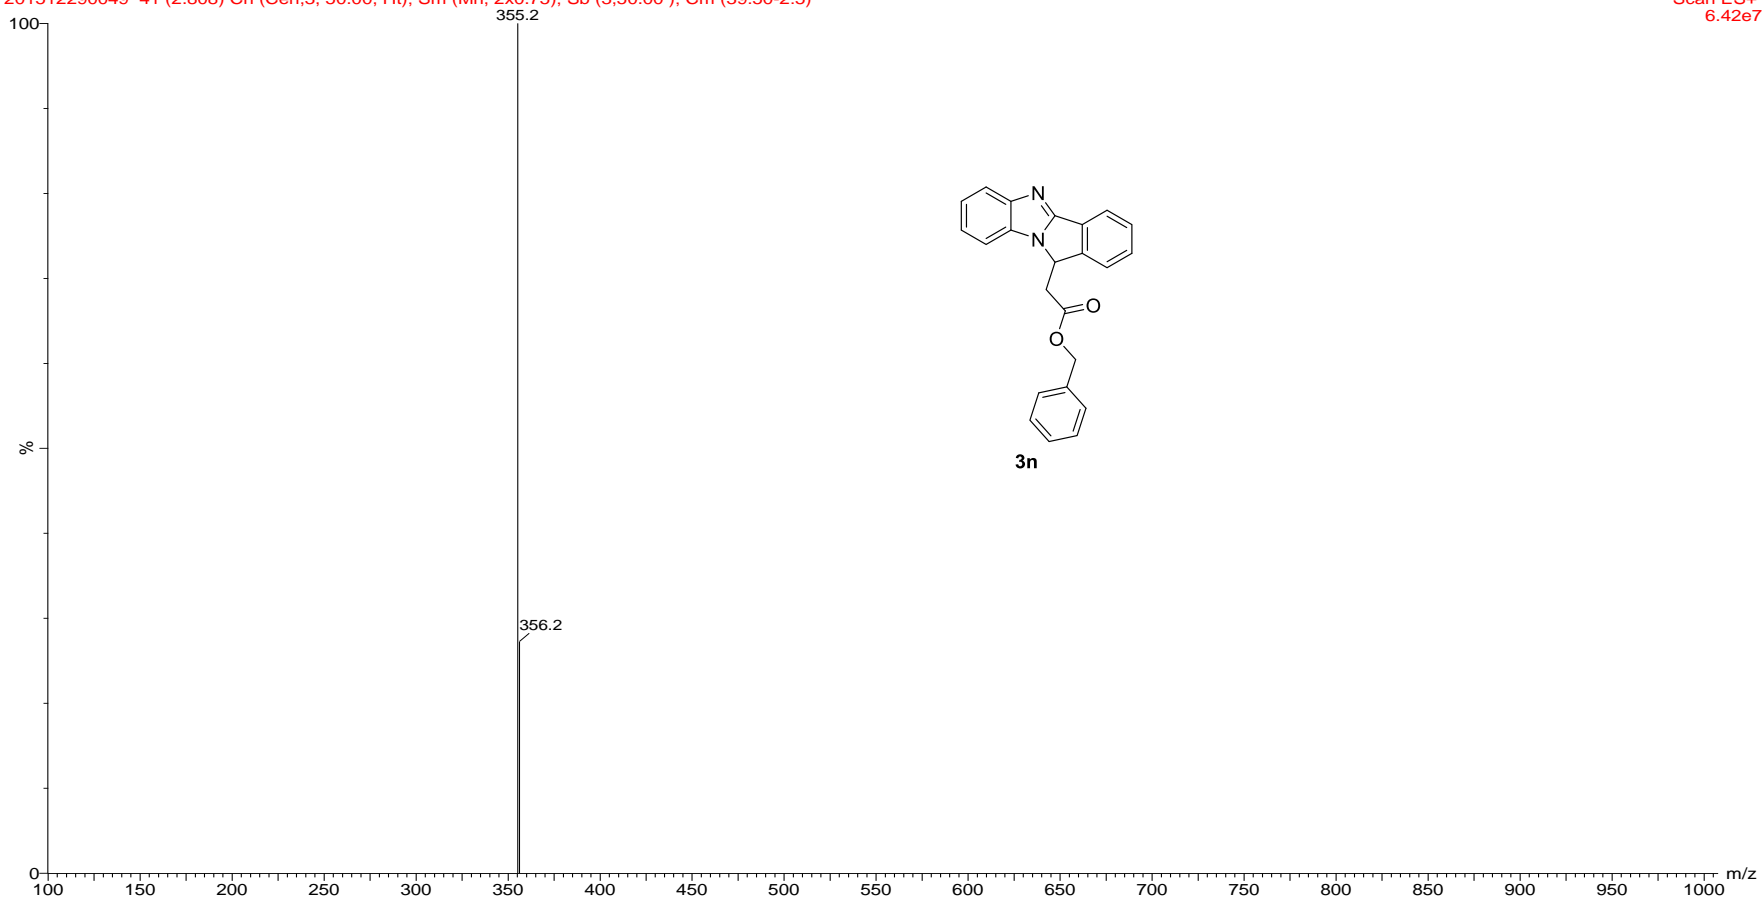

ESI<sup>+</sup> Mass spectrum of compound **3n**

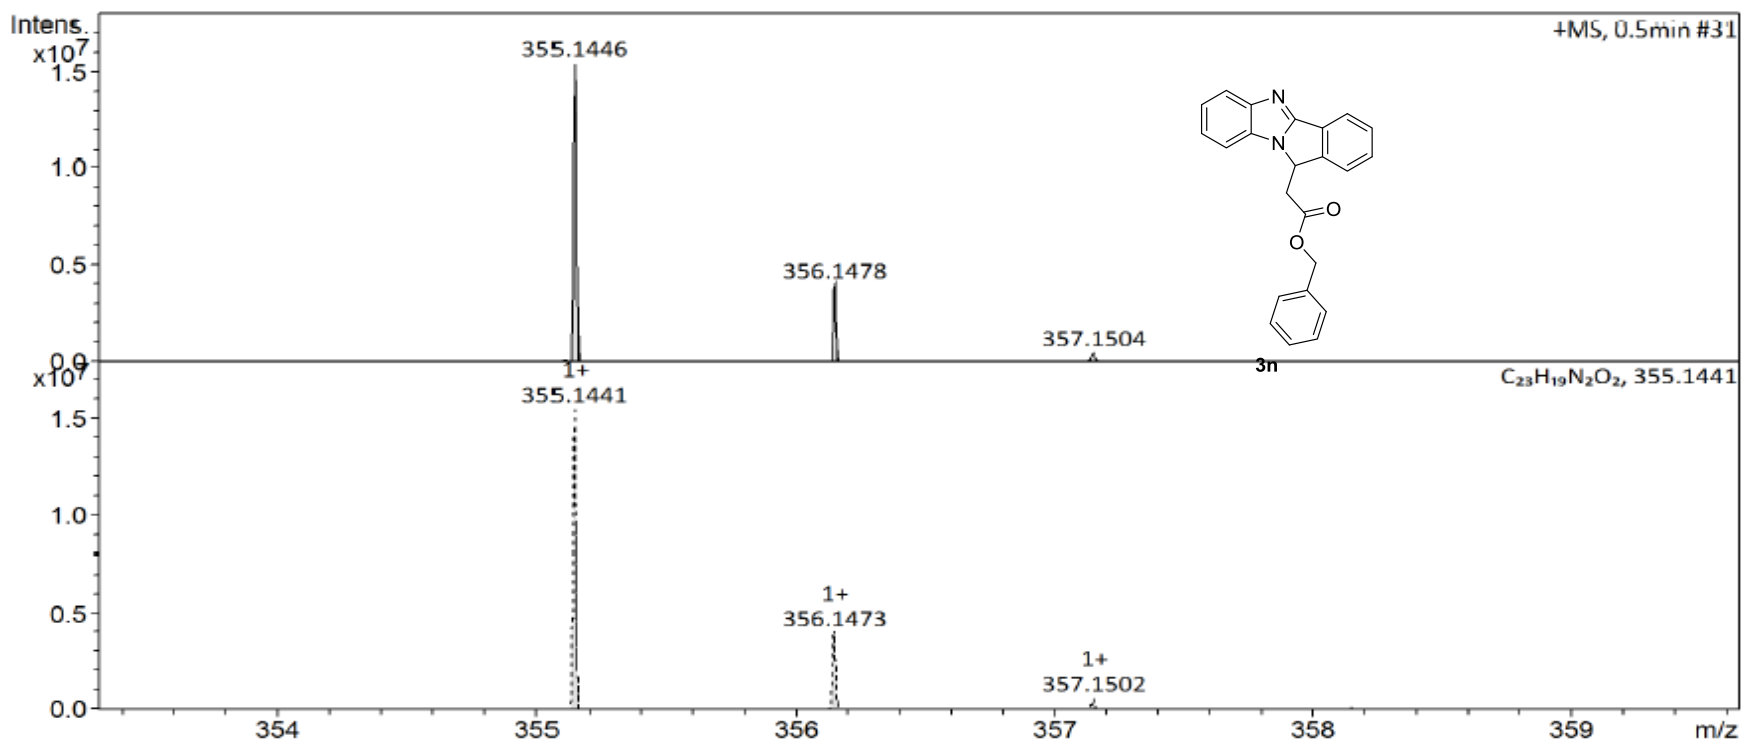

| Meas. m/z | # | Ion Formula                                                   | m/z      | err [ppm] | mSigma | # Sigma | Score  | rdb  | e <sup>-</sup> Conf | N-Rule | Adduct |
|-----------|---|---------------------------------------------------------------|----------|-----------|--------|---------|--------|------|---------------------|--------|--------|
| 355.1446  | 1 | C <sub>23</sub> H <sub>19</sub> N <sub>2</sub> O <sub>2</sub> | 355.1441 | 1.4       | 4.2    | 1       | 100.00 | 15.5 | even                | ok     | M+H    |

High resolution mass (ESI)<sup>+</sup> spectrum of compound of **3n**

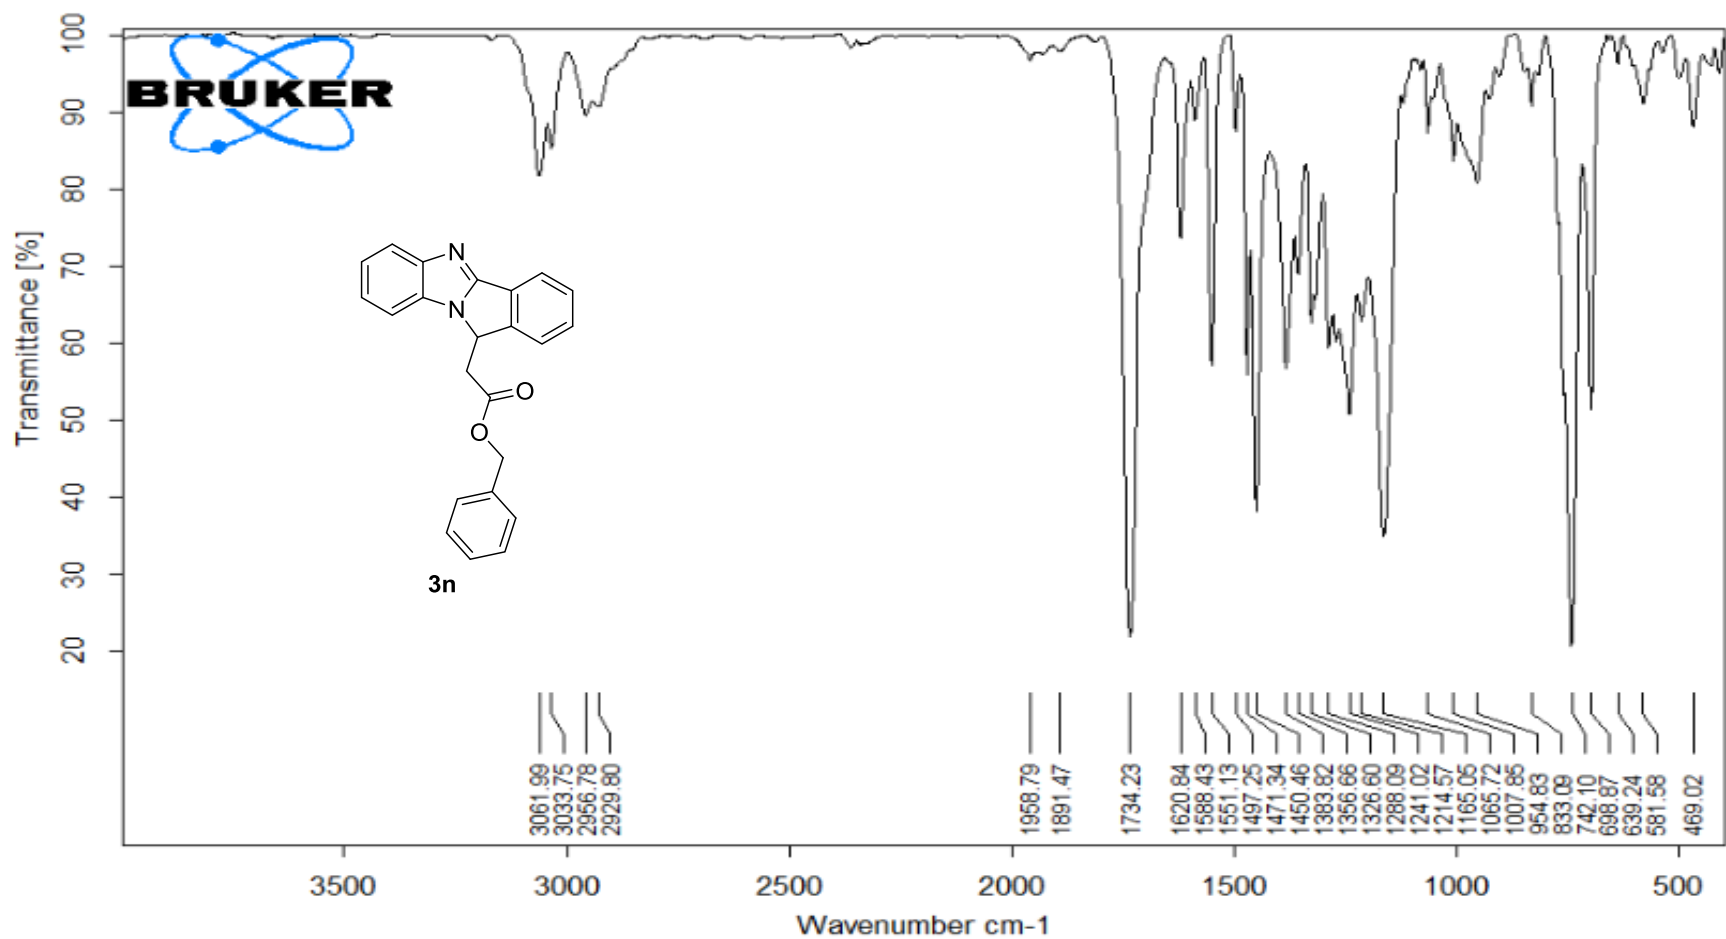

IR spectrum of compound of **3n**

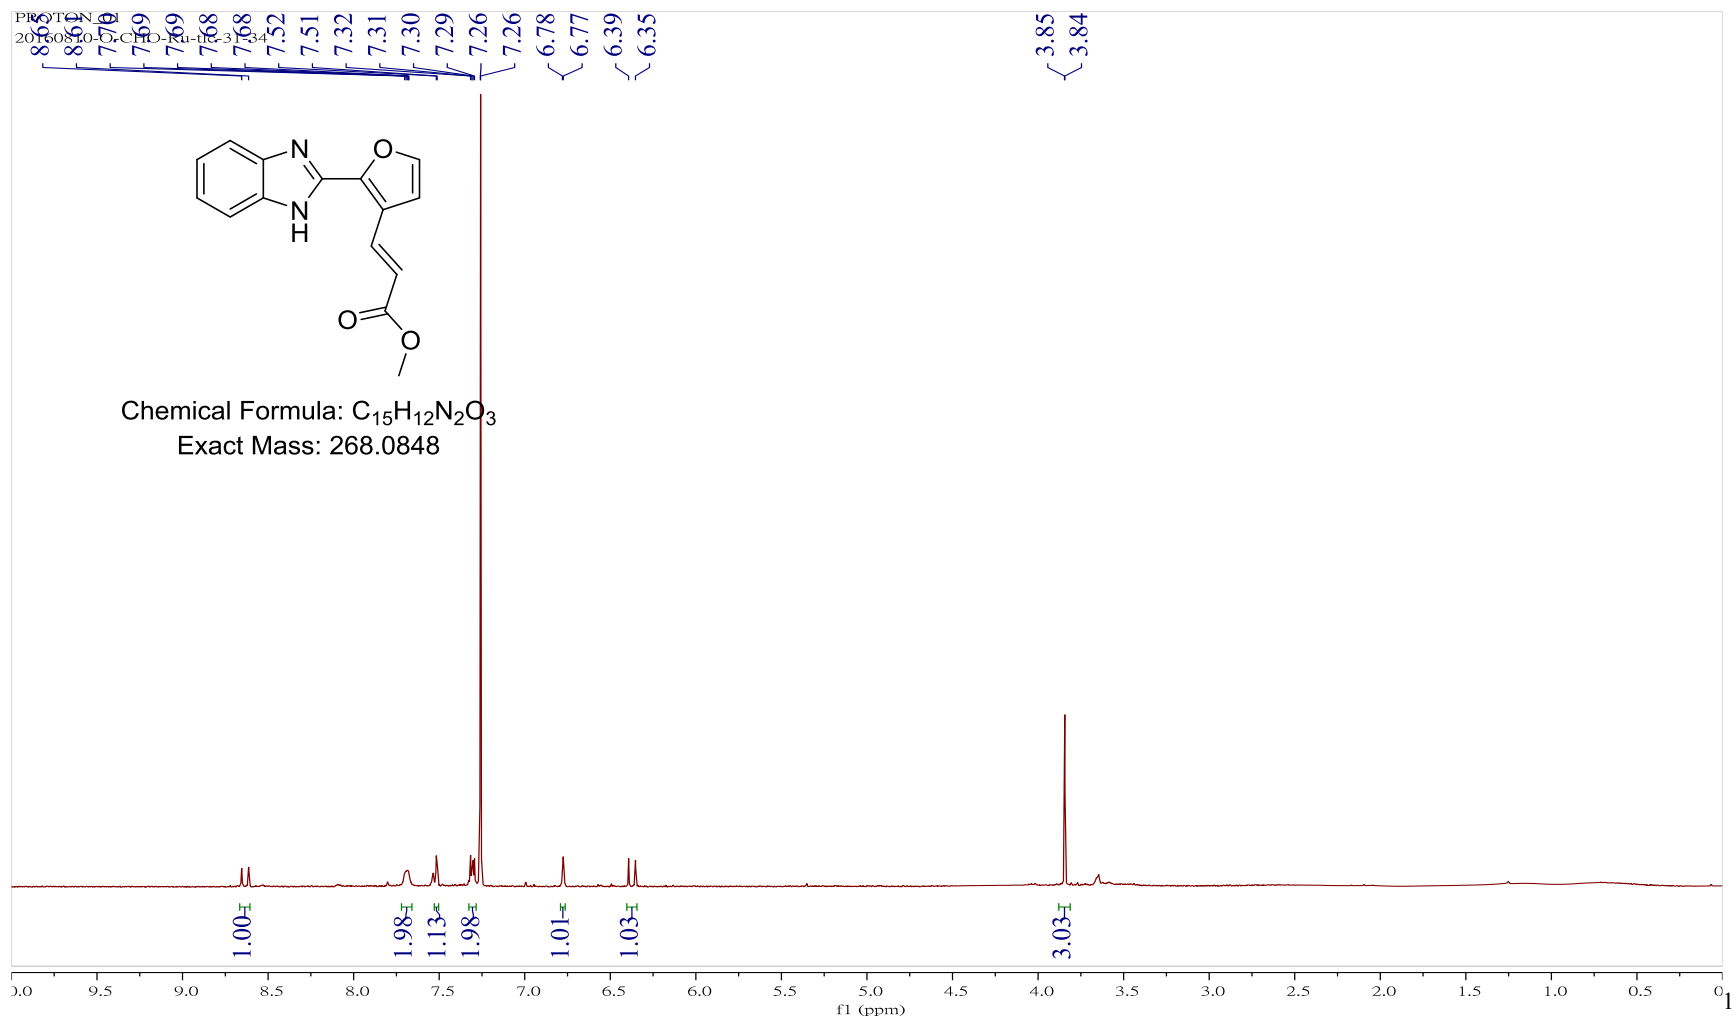

$^1H$  NMR Spectrum (400 MHz) of compound **4b** in  $CDCl_3$

**O-CHO-Ru-2**

20160812003\_11 (0.753) Cn (Cen,3, 80.00, Ht); Sm (Mn, 2x0.75); Sb (3,50.00); Cm (9:14-4:6)

Scan ES+  
7.23e6

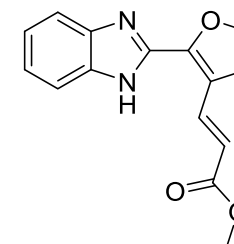

Chemical Formula: C<sub>15</sub>H<sub>12</sub>N<sub>2</sub>O<sub>3</sub>  
Exact Mass: 268.0848

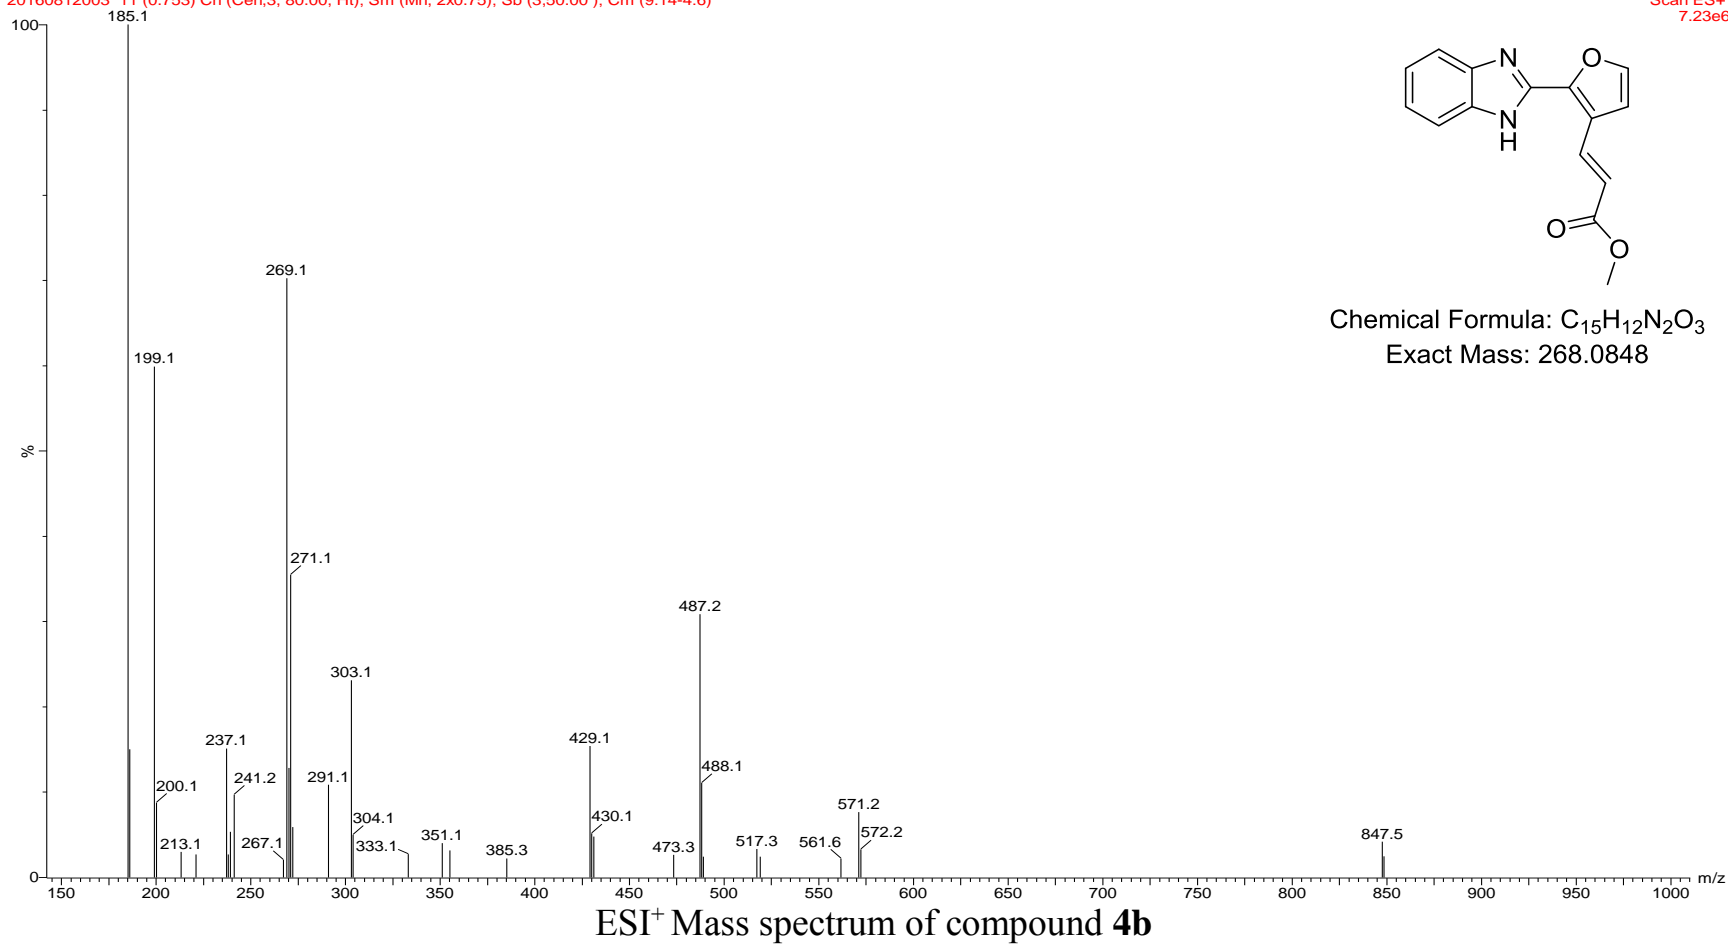



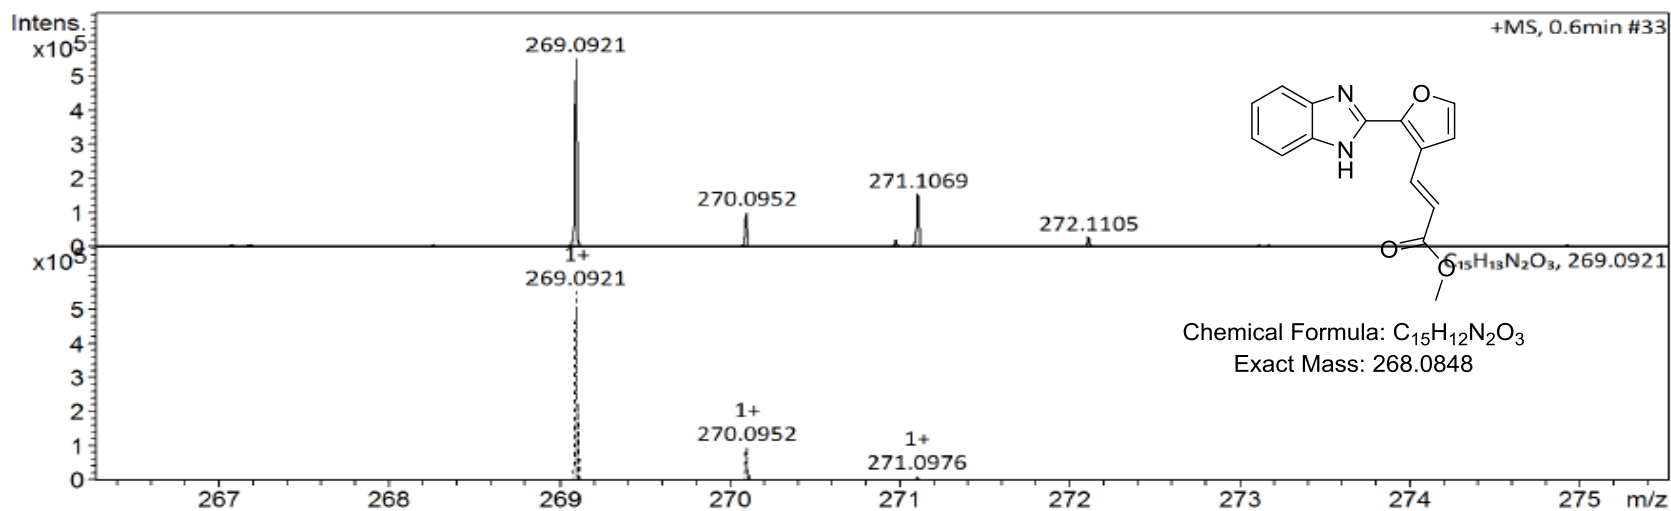

| Meas. m/z | # | Ion Formula                                                   | m/z      | err [ppm] | mSigma | # Sigma | Score  | rdb  | e <sup>-</sup> Conf | N-Rule | Adduct |
|-----------|---|---------------------------------------------------------------|----------|-----------|--------|---------|--------|------|---------------------|--------|--------|
| 269.0921  | 1 | C <sub>15</sub> H <sub>13</sub> N <sub>2</sub> O <sub>3</sub> | 269.0921 | -0.3      | 12.8   | 1       | 100.00 | 10.5 | even                | ok     | M+H    |

High resolution mass (ESI)<sup>+</sup> spectrum of compound of **4b**

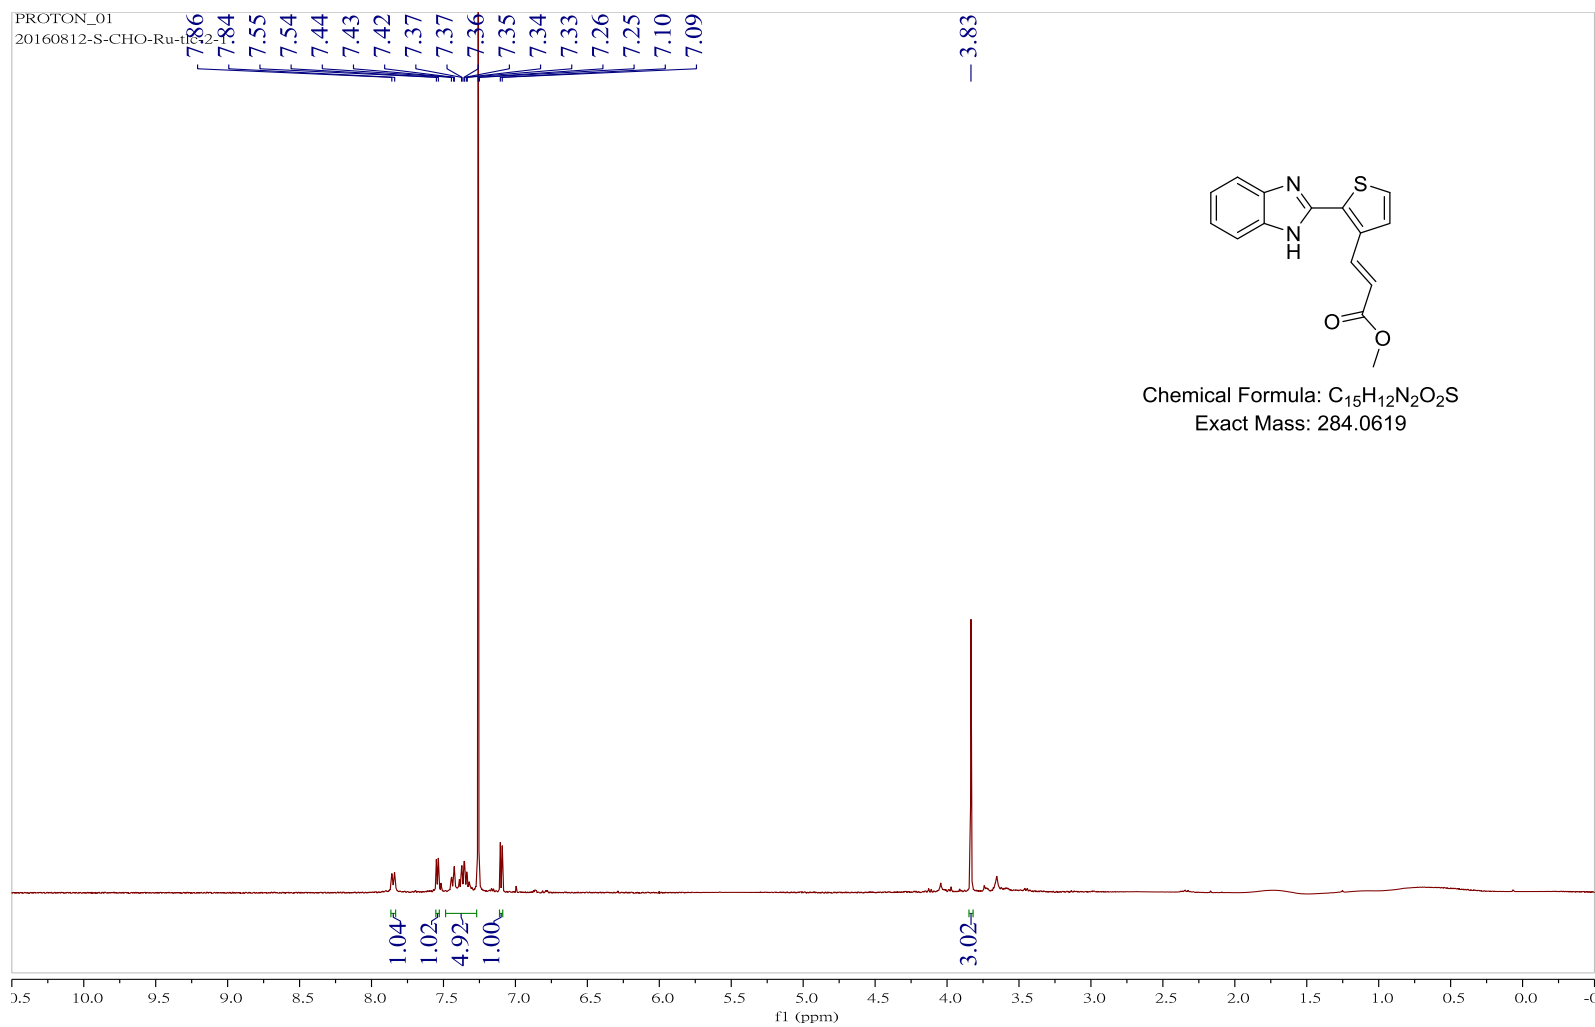

<sup>1</sup>H NMR Spectrum (400 MHz) of compound **4c** in CDCl<sub>3</sub>

SD-N7-03-I

201703310016 27 (1.849) Cn (Cen,3, 80.00, Ht); Sm (Mn, 2x0.75); Sb (3,50.00); Cm (26:30-2:12)

Scan ES+  
9.16e6

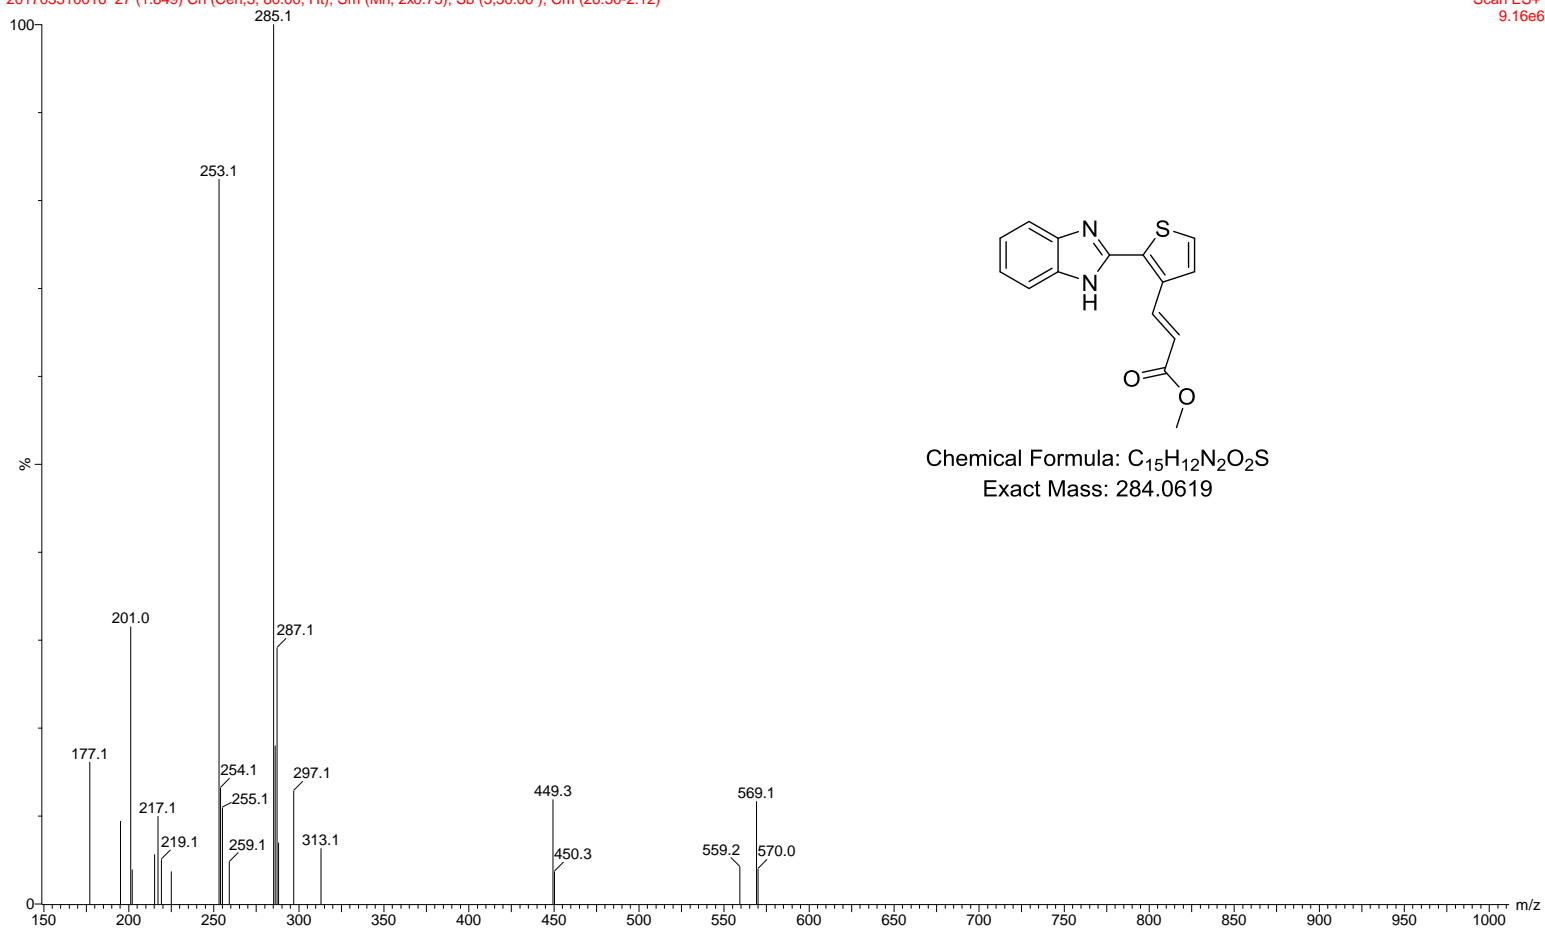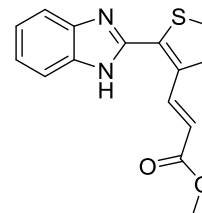

Chemical Formula: C<sub>15</sub>H<sub>12</sub>N<sub>2</sub>O<sub>2</sub>S  
Exact Mass: 284.0619

ESI<sup>+</sup> Mass spectrum of compound **4c**

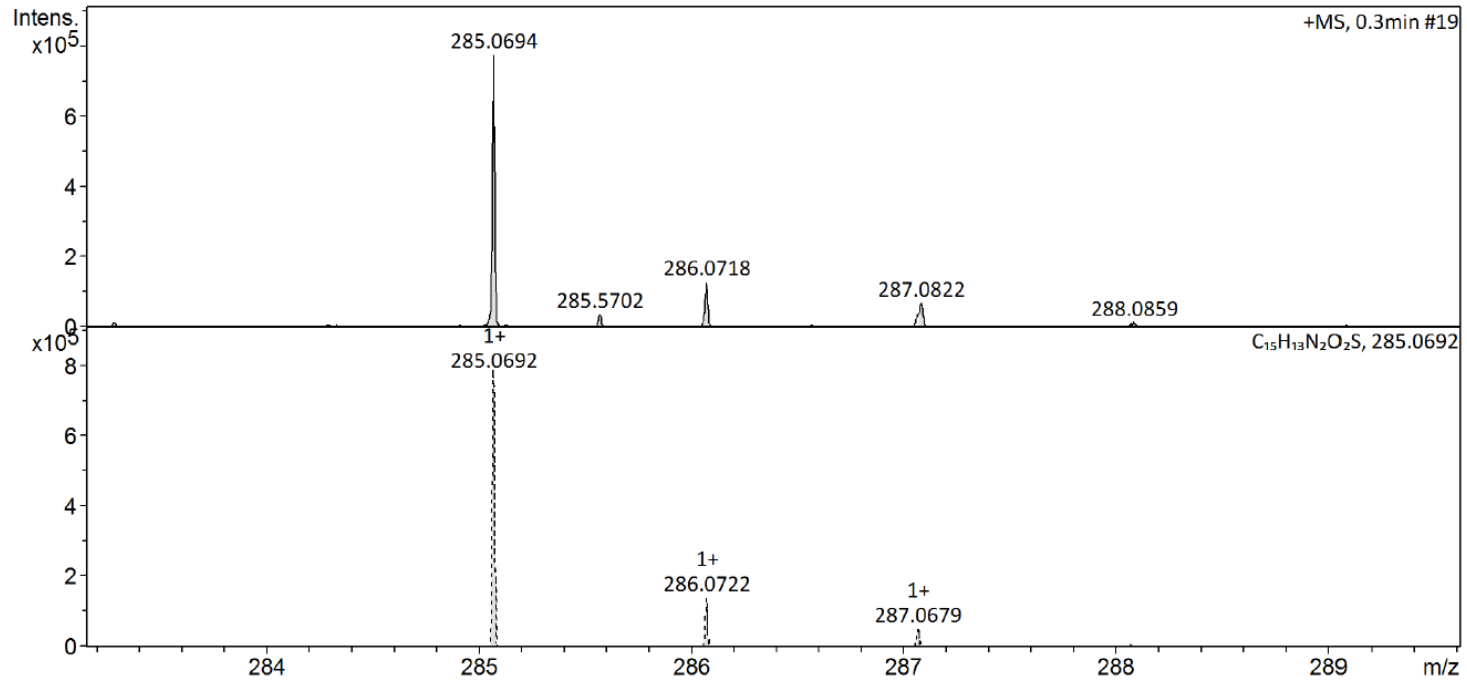

| Meas. m/z | # | Ion Formula                                                     | m/z      | err [ppm] | mSigma | # Sigma | Score  | rdb  | e <sup>-</sup> Conf | N-Rule | Adduct |
|-----------|---|-----------------------------------------------------------------|----------|-----------|--------|---------|--------|------|---------------------|--------|--------|
| 285.0694  | 1 | C <sub>15</sub> H <sub>13</sub> N <sub>2</sub> O <sub>2</sub> S | 285.0692 | 0.8       | 33.0   | 1       | 100.00 | 10.5 | even                | ok     | M+H    |

High resolution mass (ESI)<sup>+</sup> spectrum of compound of **4c**

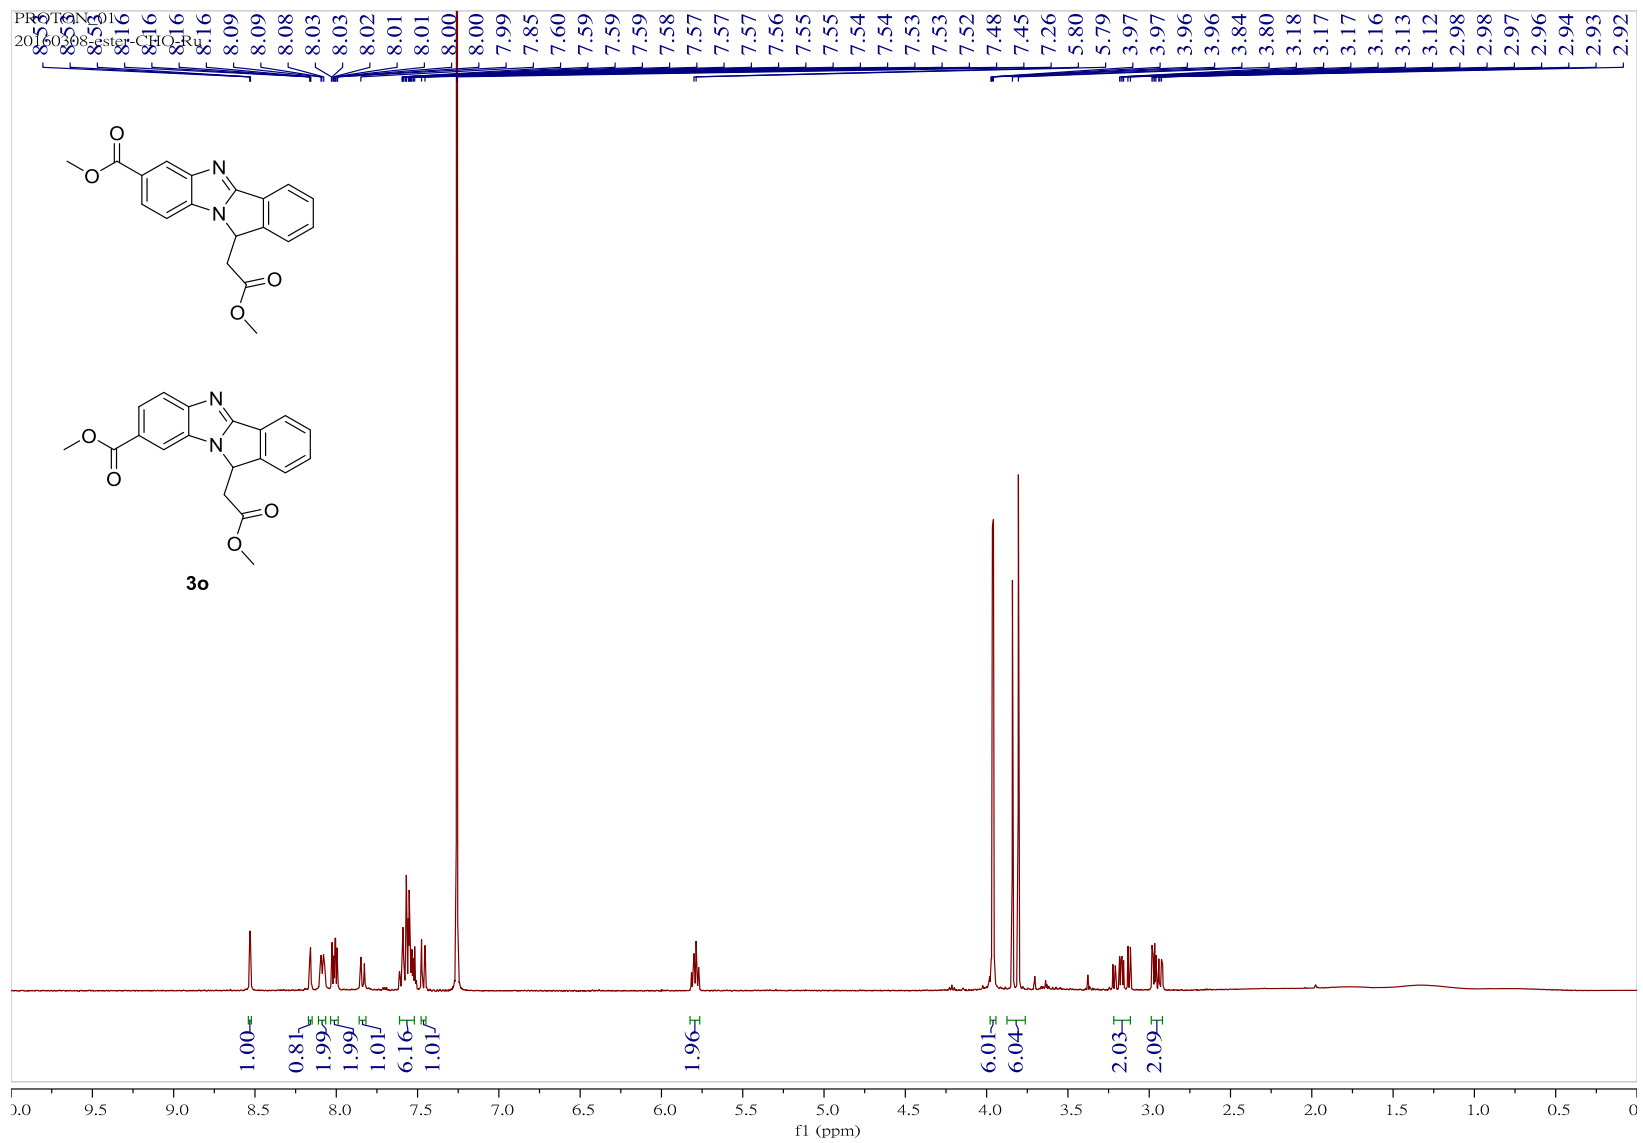

<sup>1</sup>H NMR Spectrum (400 MHz) of compound **3o** in CDCl<sub>3</sub>

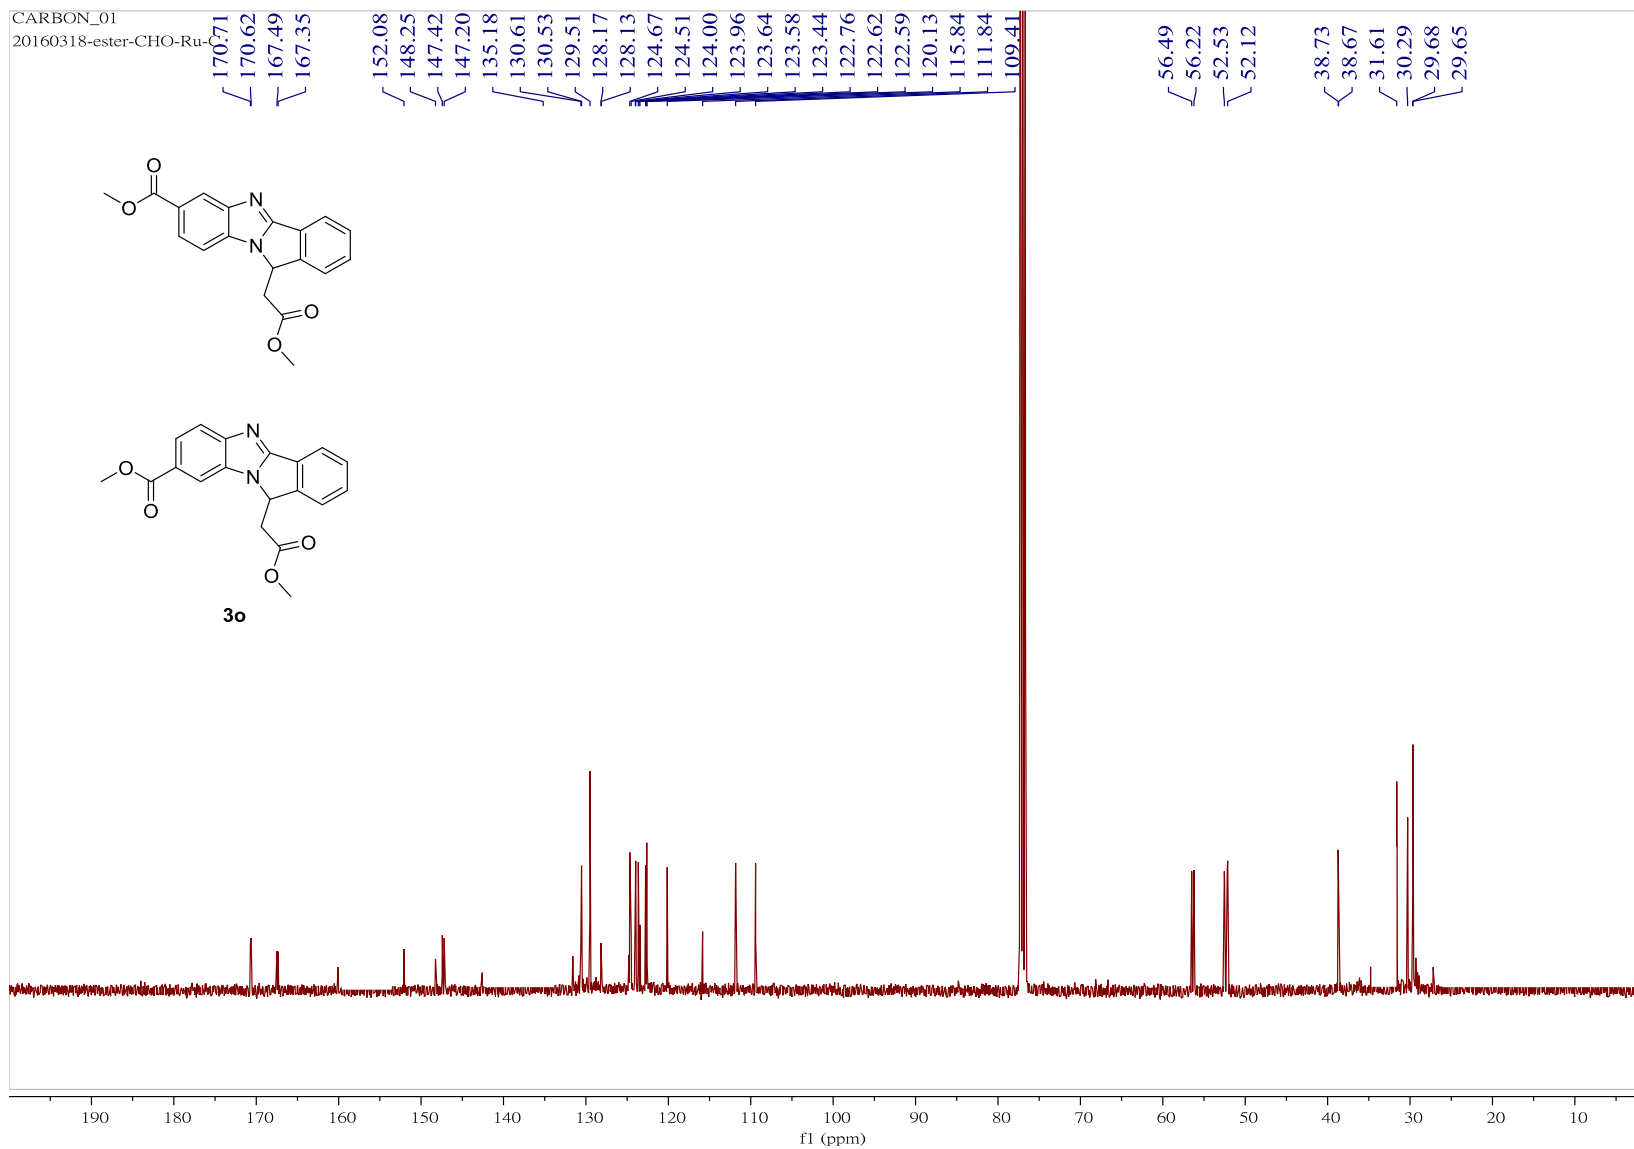

$^{13}\text{C}$  NMR Spectrum (100 MHz) of compound **3o** in  $\text{CDCl}_3$

ester-CHO-Ru

2016032200014 6 (0.411) Cn (Cen,3, 80.00, Ht); Sm (Mn, 2x0.75); Sb (3,50.00); Cm (6:14-2:3)

Scan ES+  
3.18e7

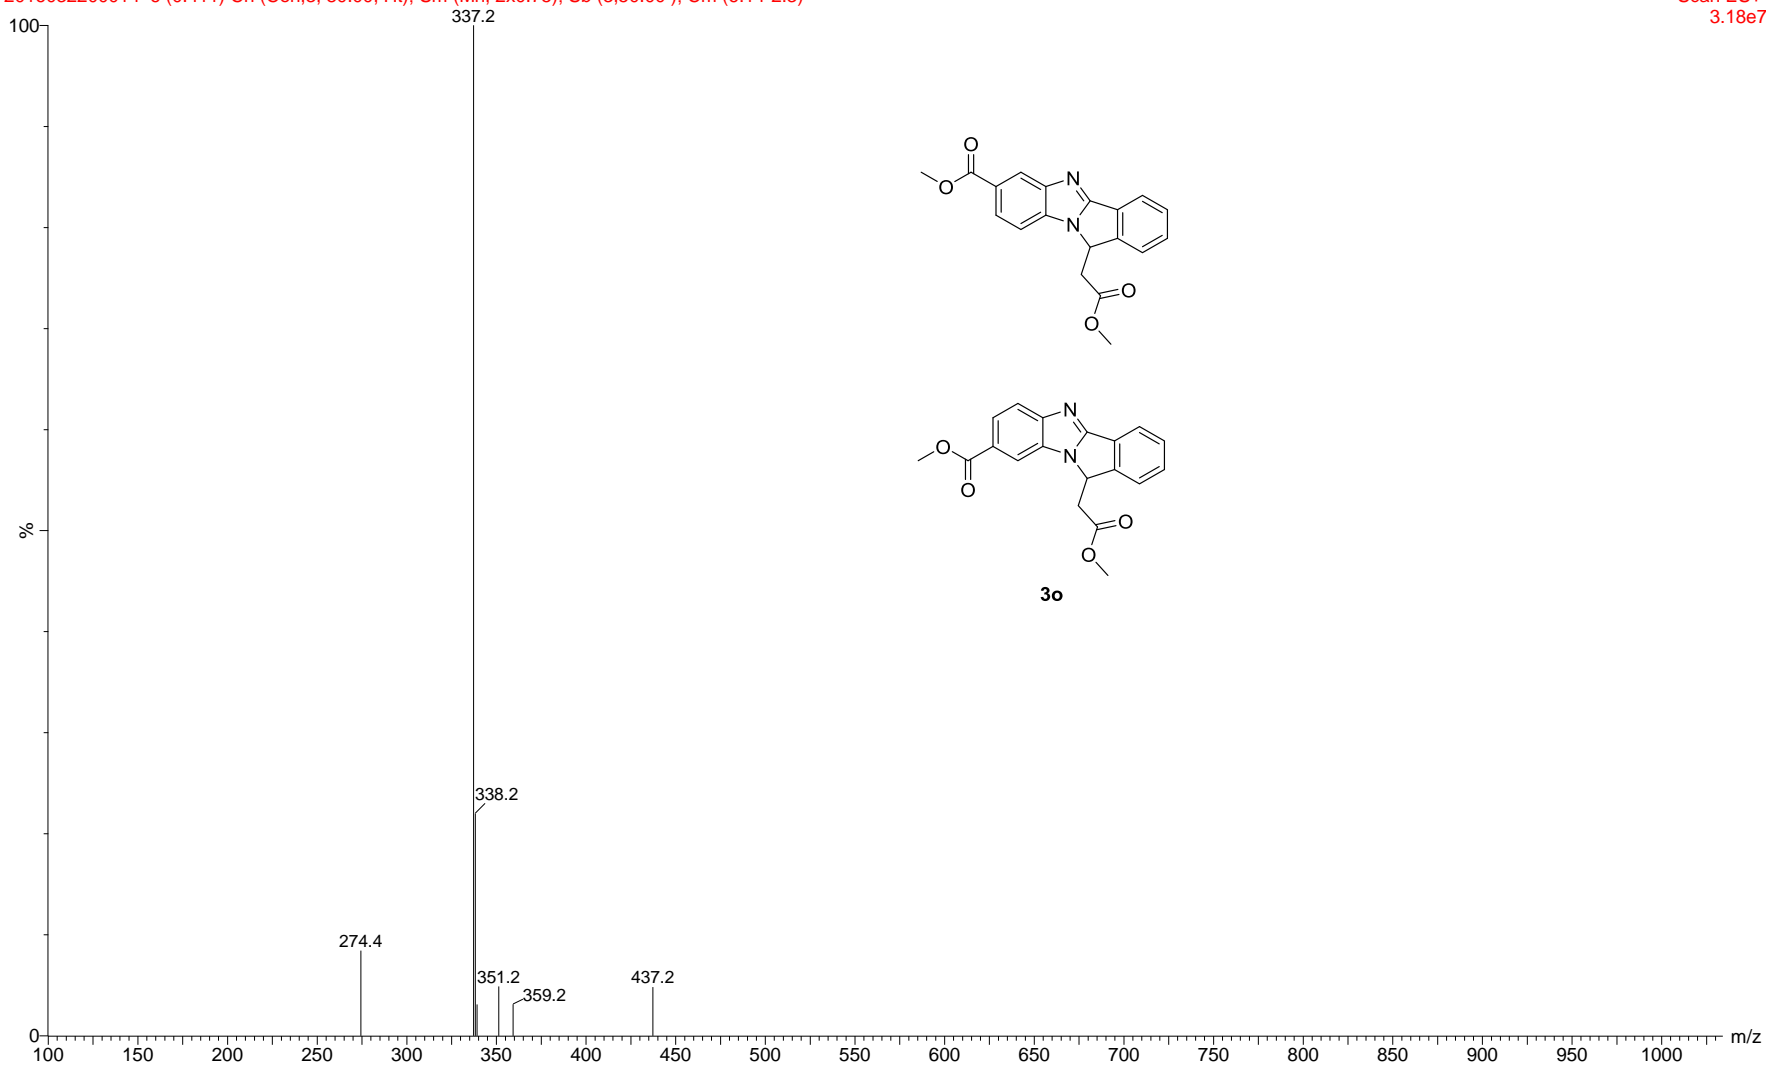

ESI<sup>+</sup> Mass spectrum of compound **3o**

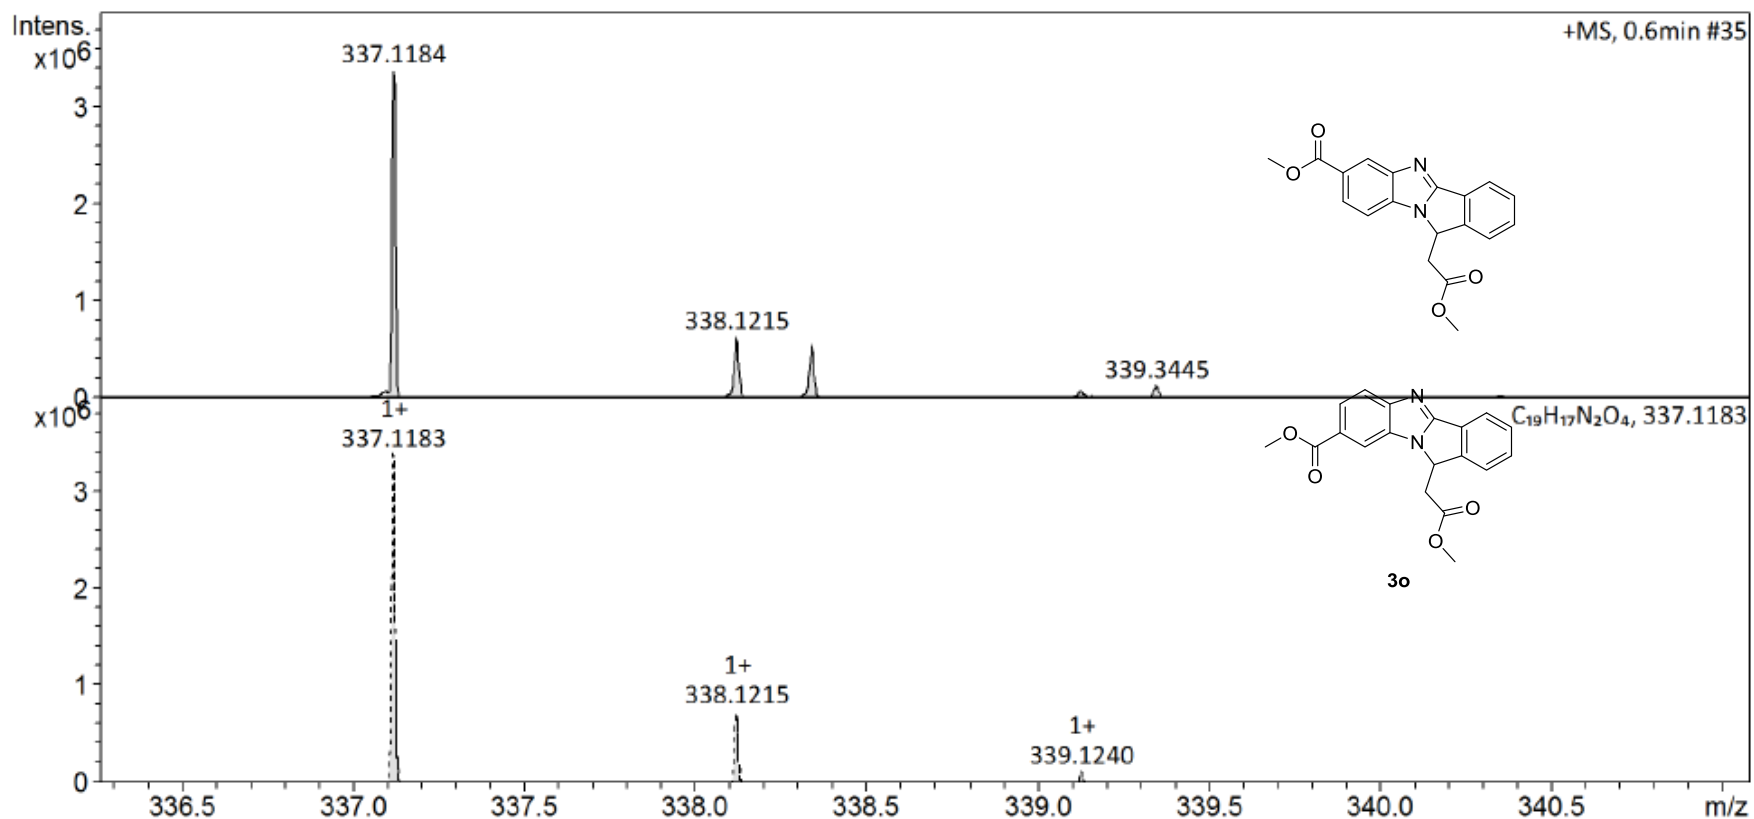

High resolution mass (ESI)<sup>+</sup> spectrum of compound of **3o**



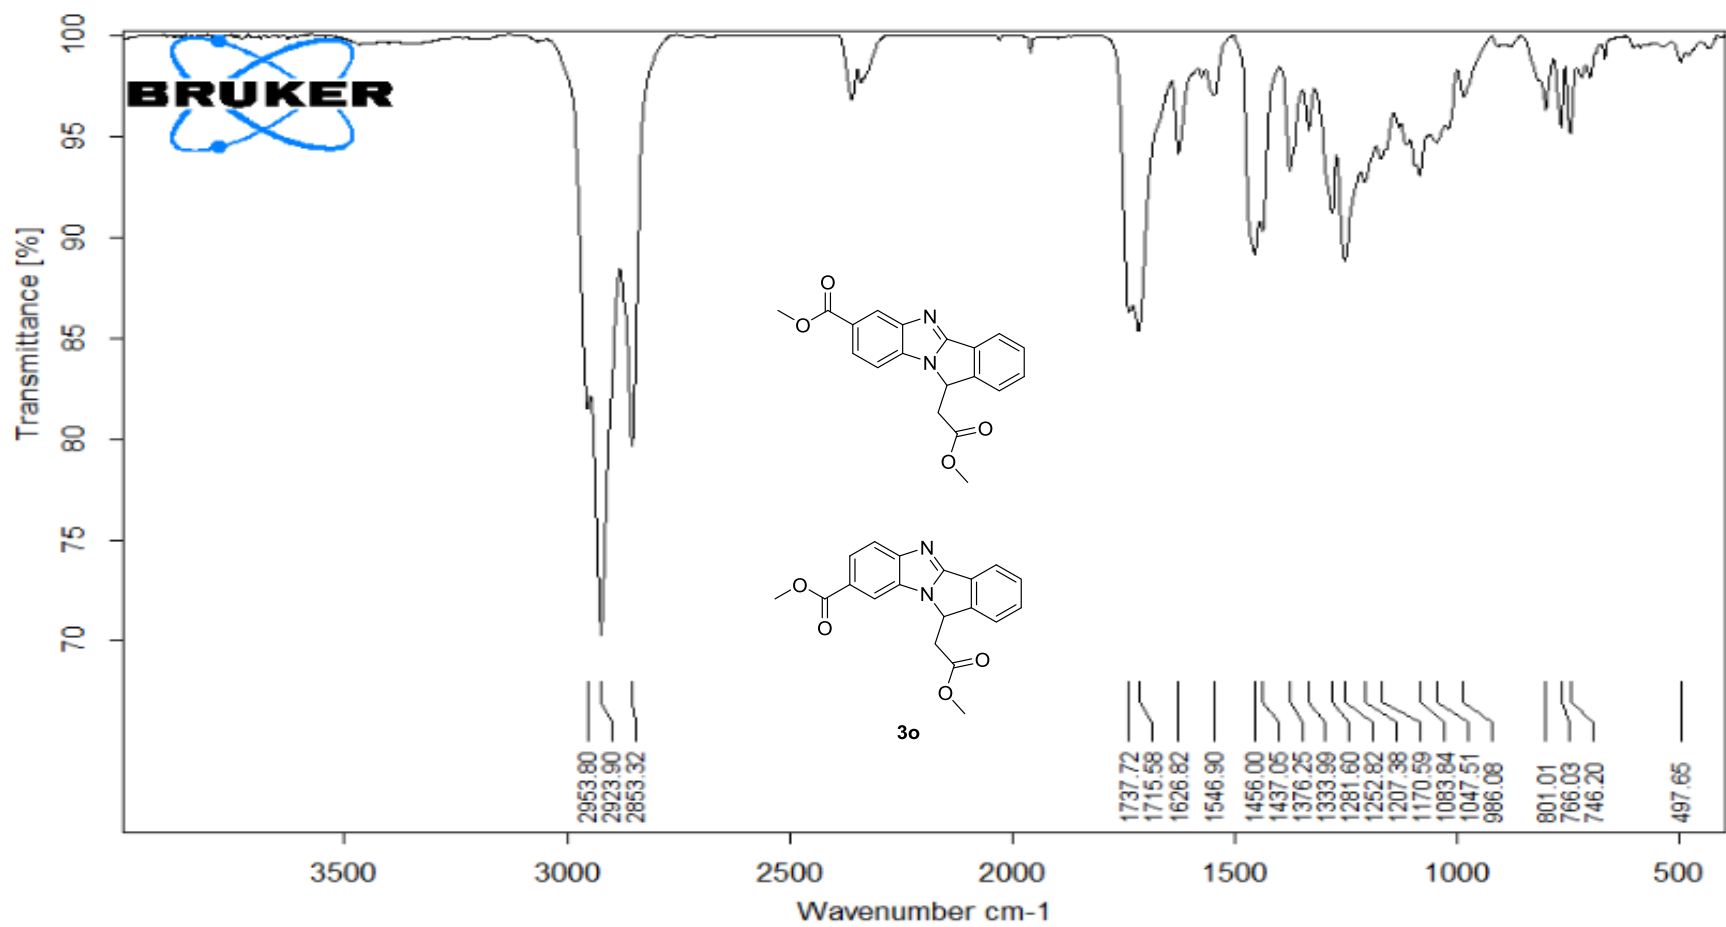

IR spectrum of compound of **3o**

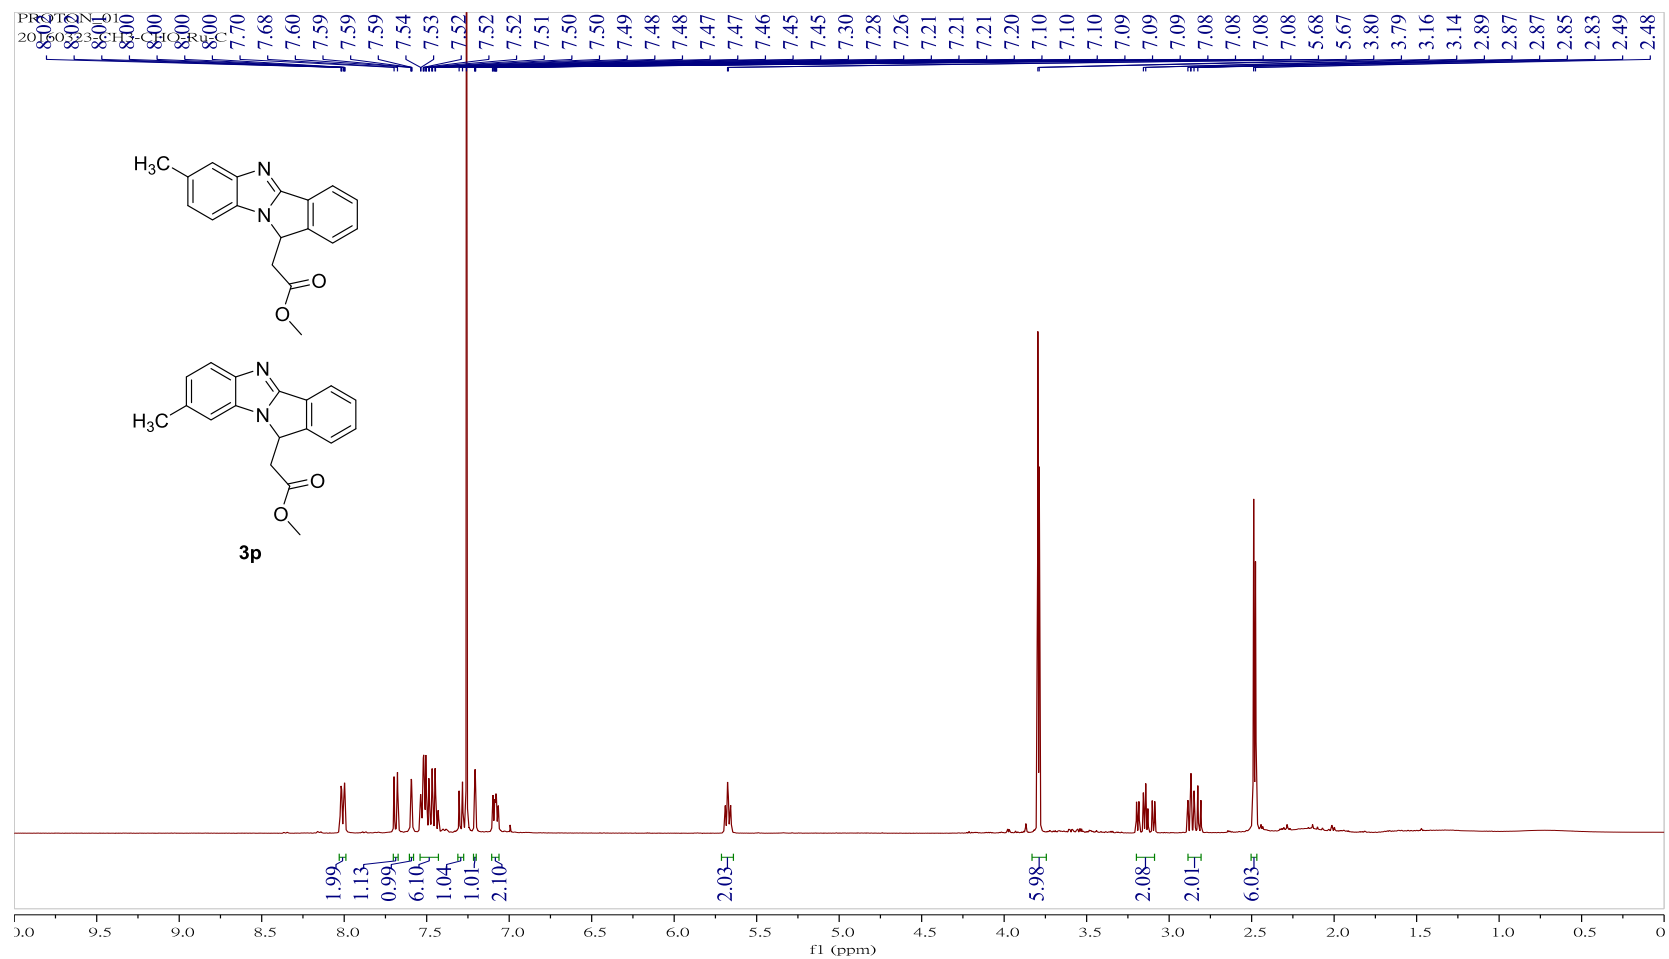

$^1\text{H}$  NMR Spectrum (400 MHz) of compound **3p** in  $\text{CDCl}_3$

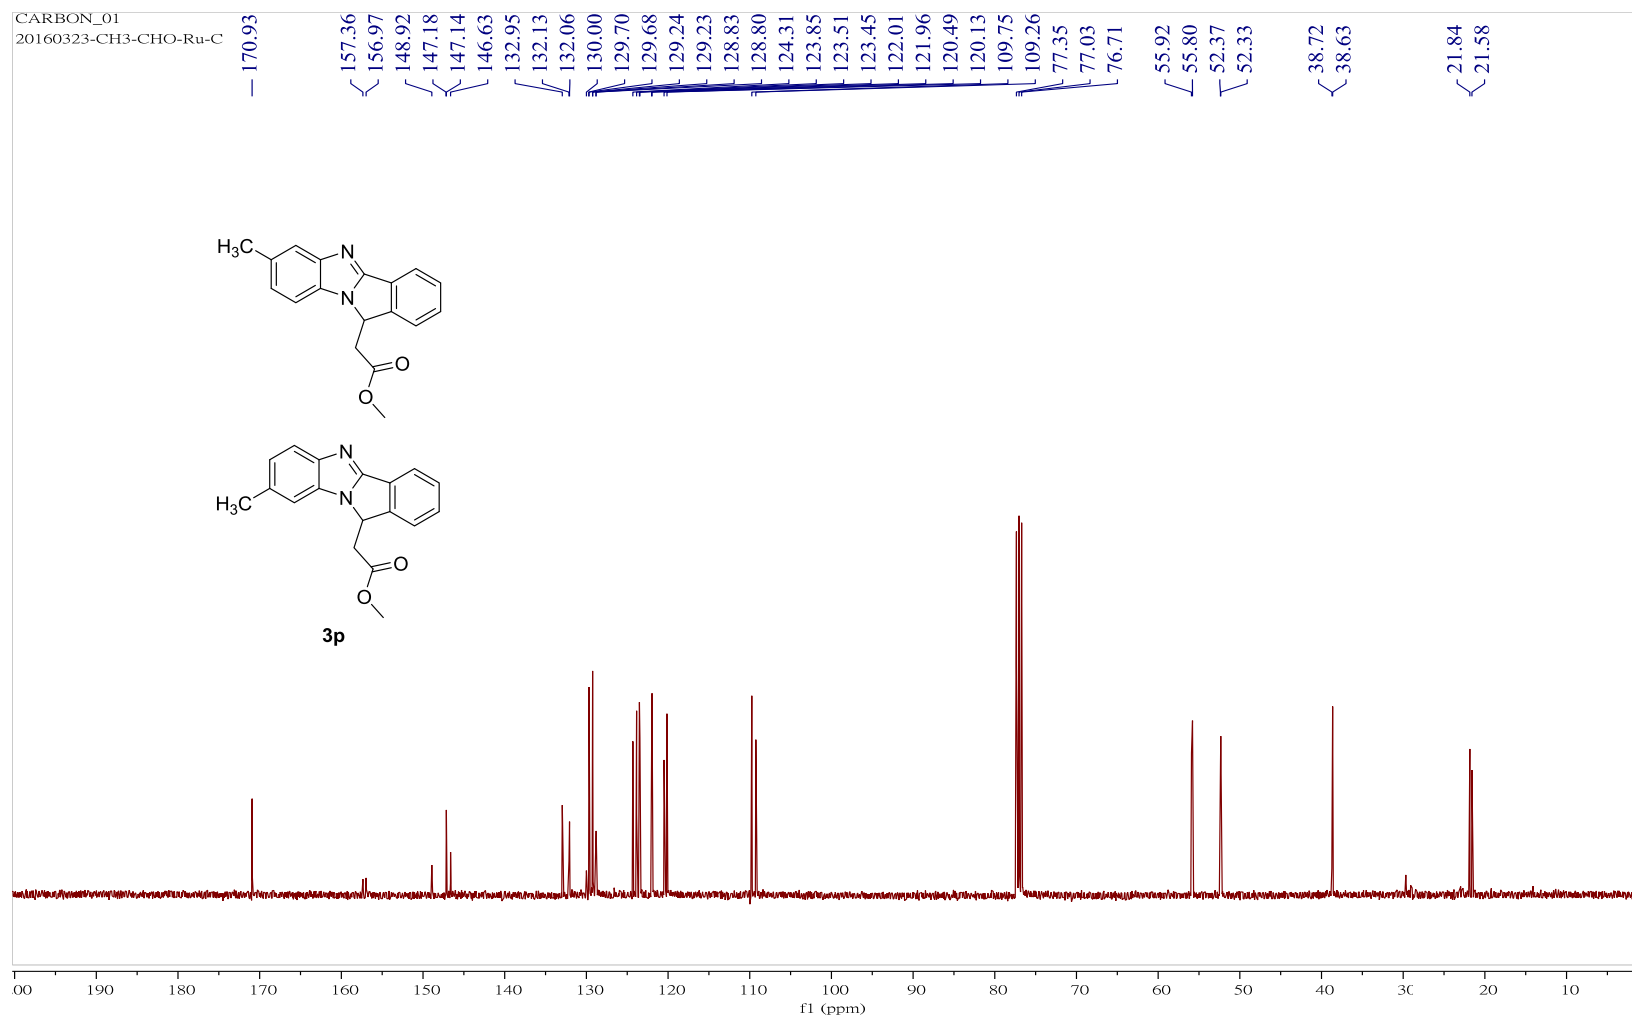

$^{13}\text{C}$  NMR Spectrum (100 MHz) of compound **3p** in  $\text{CDCl}_3$

**CH3-CHO-Ru**

201603250012 13 (0.890) Cn (Cen,3, 80.00, Ht); Sm (Mn, 2x0.75); Sb (3,50.00 ); Cm (13:16-3:8)

Scan ES+  
8.03e7

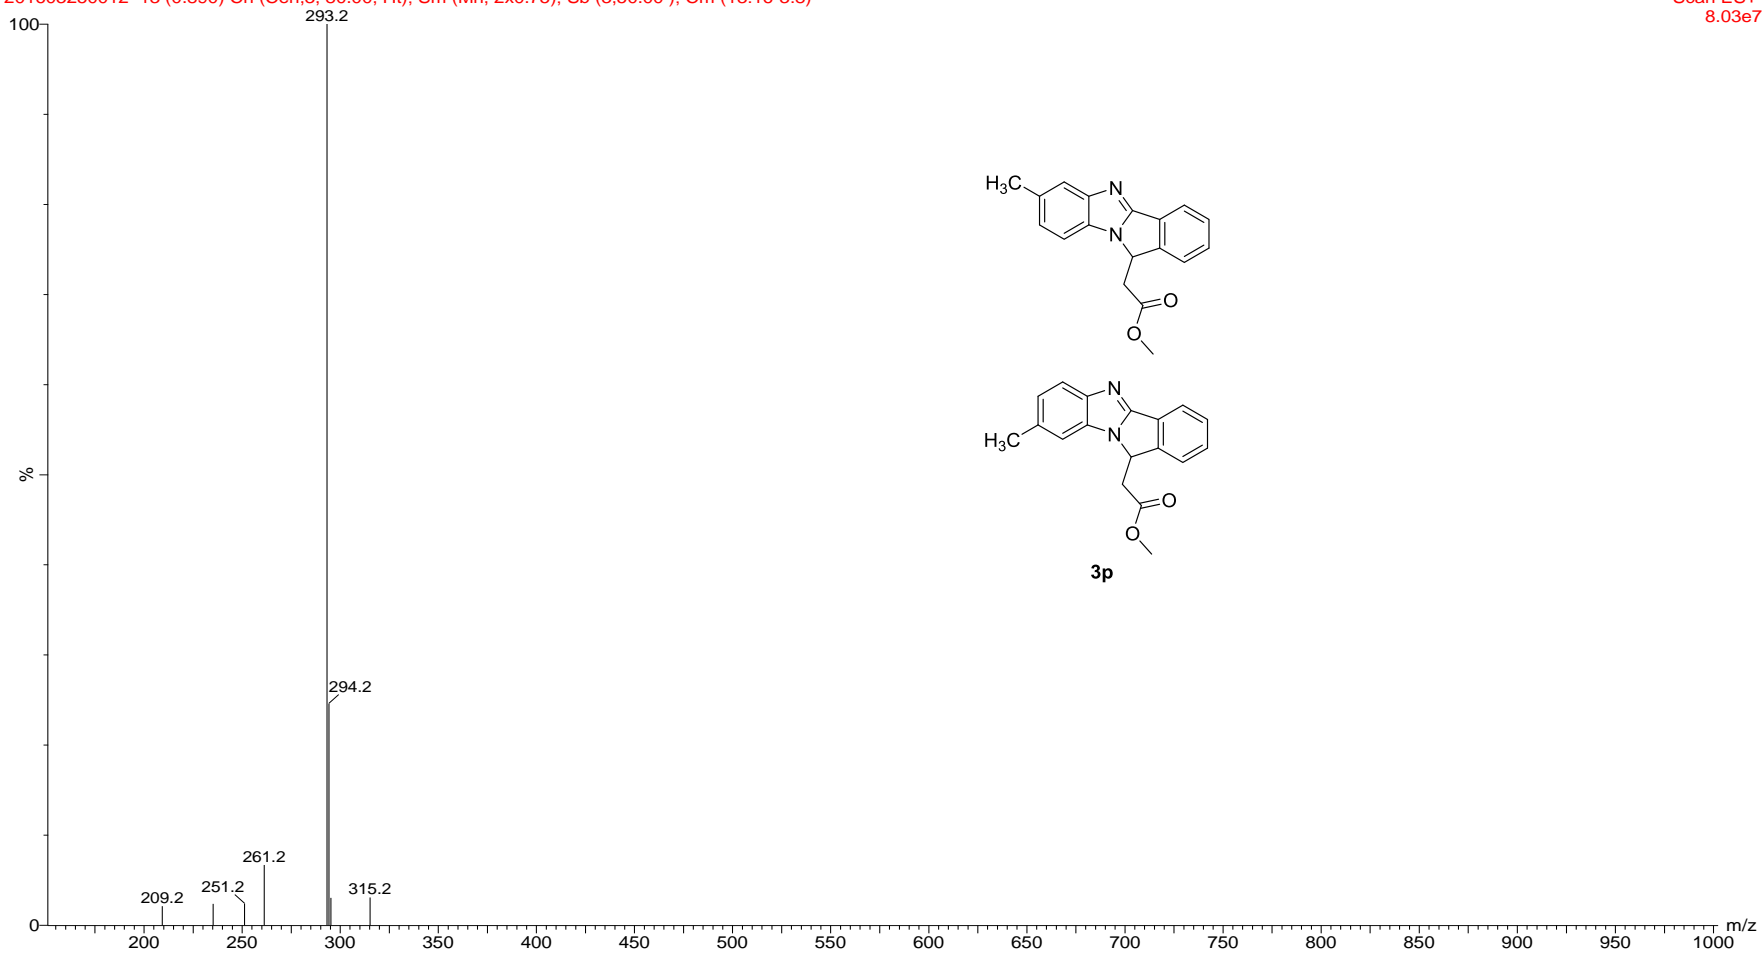

ESI<sup>+</sup> Mass spectrum of compound **3p**

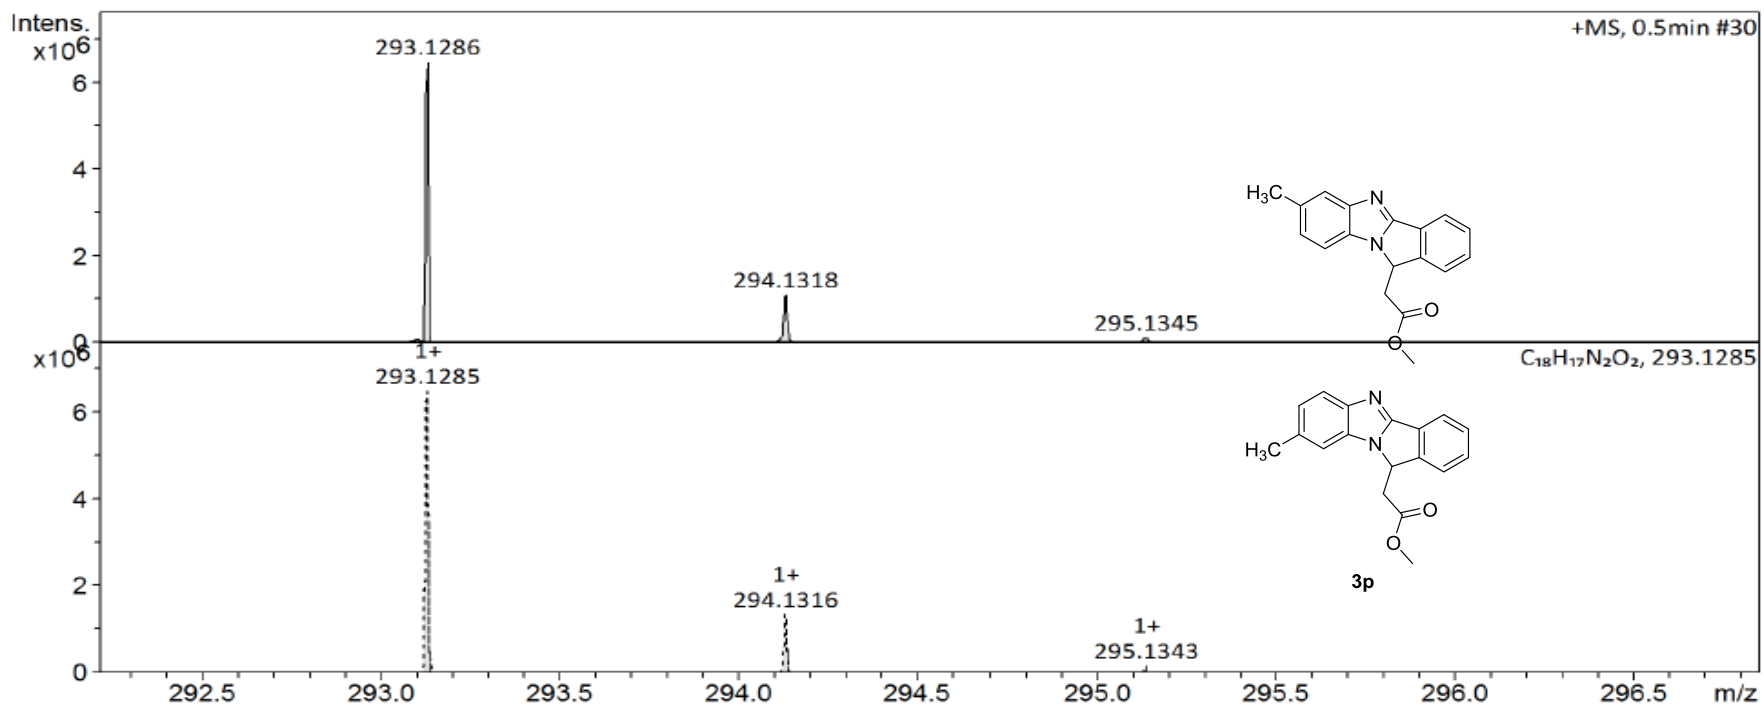

| Meas. m/z | # | Ion Formula                                                   | m/z      | err [ppm] | mSigma | # Sigma | Score  | rdb  | e <sup>-</sup> Conf | N-Rule | Adduct |
|-----------|---|---------------------------------------------------------------|----------|-----------|--------|---------|--------|------|---------------------|--------|--------|
| 293.1286  | 1 | C <sub>18</sub> H <sub>17</sub> N <sub>2</sub> O <sub>2</sub> | 293.1285 | 0.5       | 20.9   | 1       | 100.00 | 11.5 | even                | ok     | M+H    |

High resolution mass (ESI)<sup>+</sup> spectrum of compound of **3p**

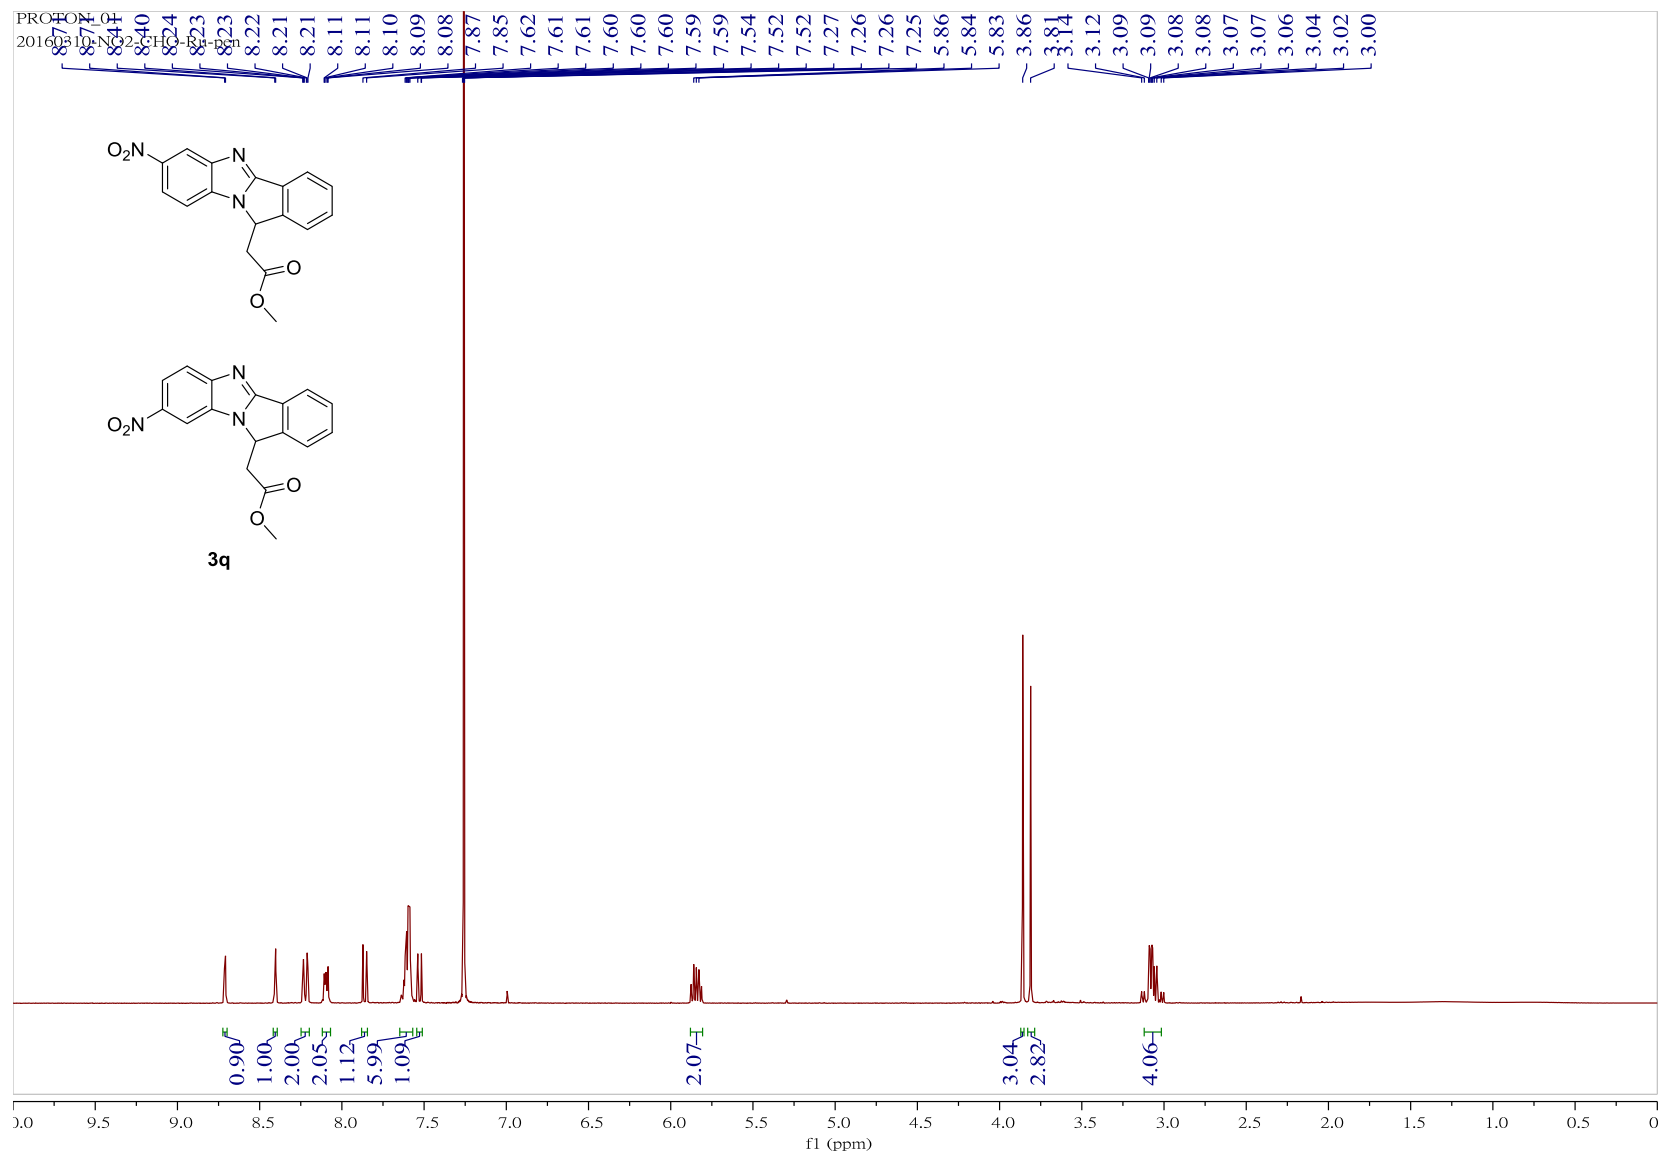

<sup>1</sup>H NMR Spectrum (400 MHz) of compound **3q** in CDCl<sub>3</sub>

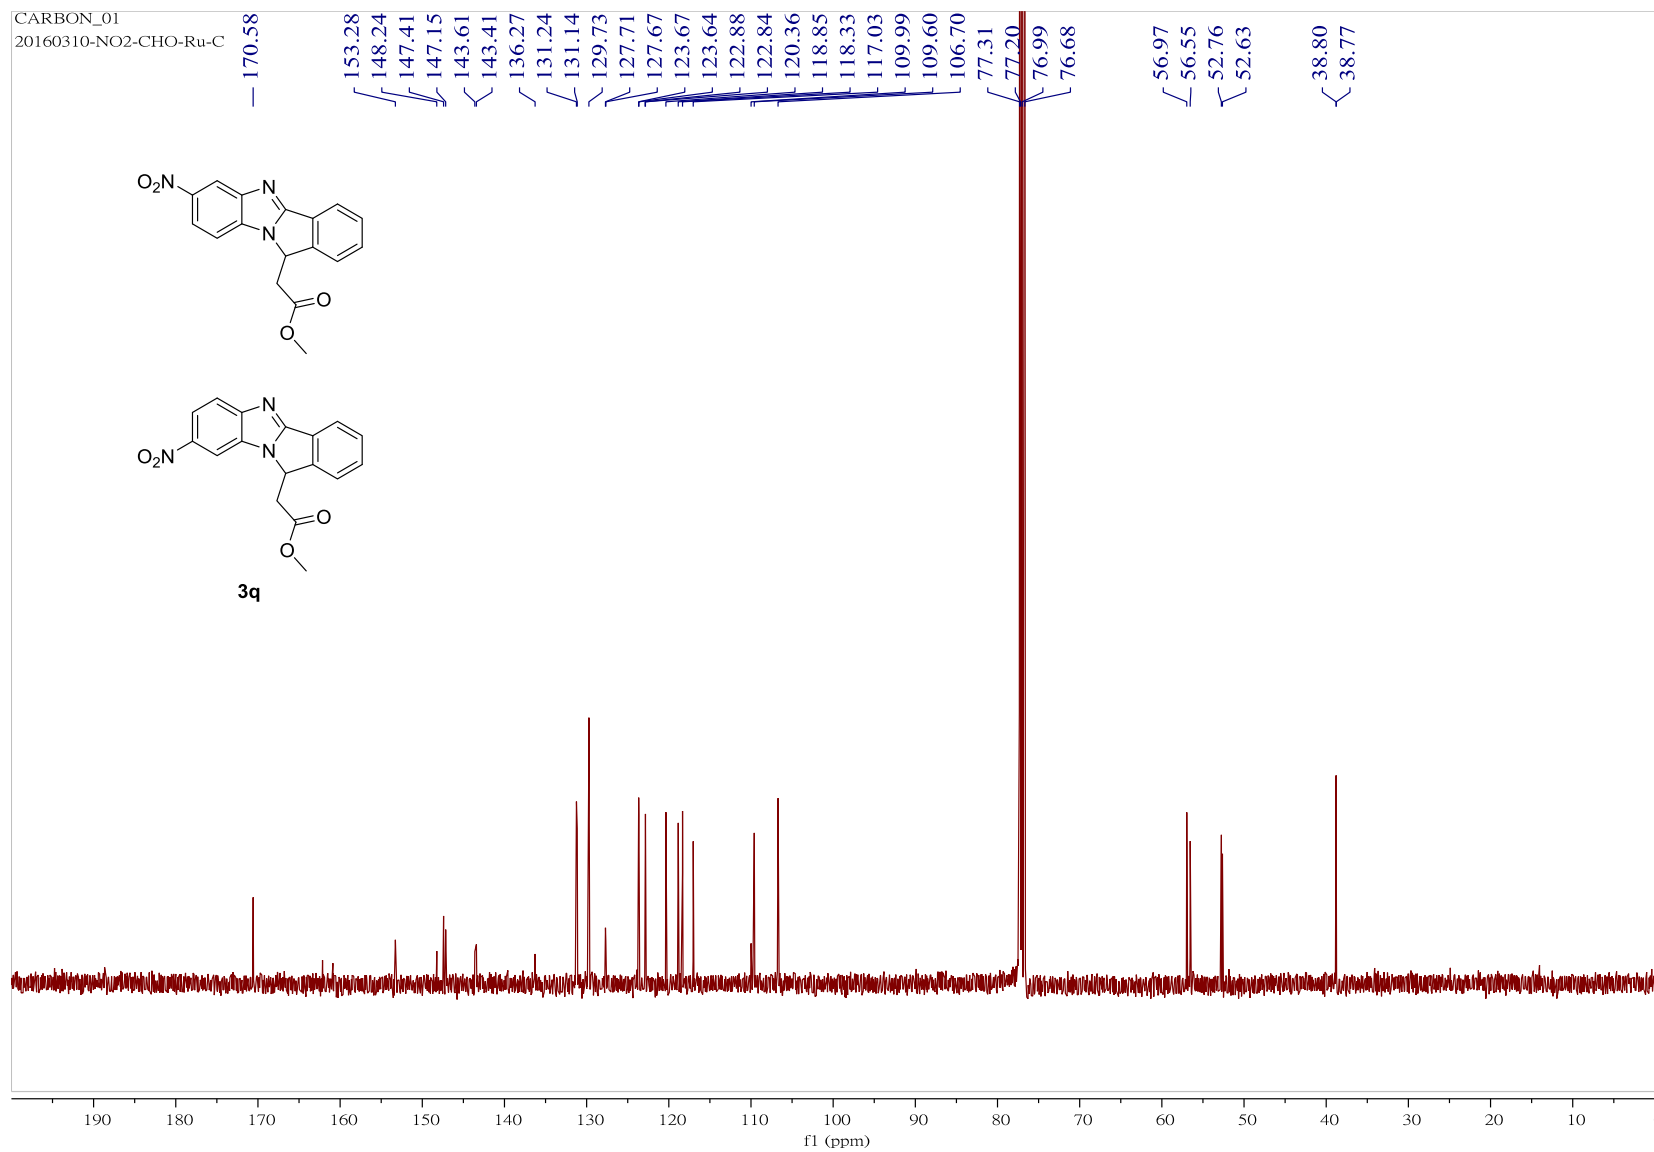

$^{13}\text{C}$  NMR Spectrum (100 MHz) of compound **3q** in  $\text{CDCl}_3$

**NO2-CHO-Ru**

20160308002 8 (0.548) Cn (Cen,3, 80.00, Ht); Sm (Mn, 2x0.75); Sb (3,50.00); Cm (7:21-1:3)

Scan ES+  
1.83e7

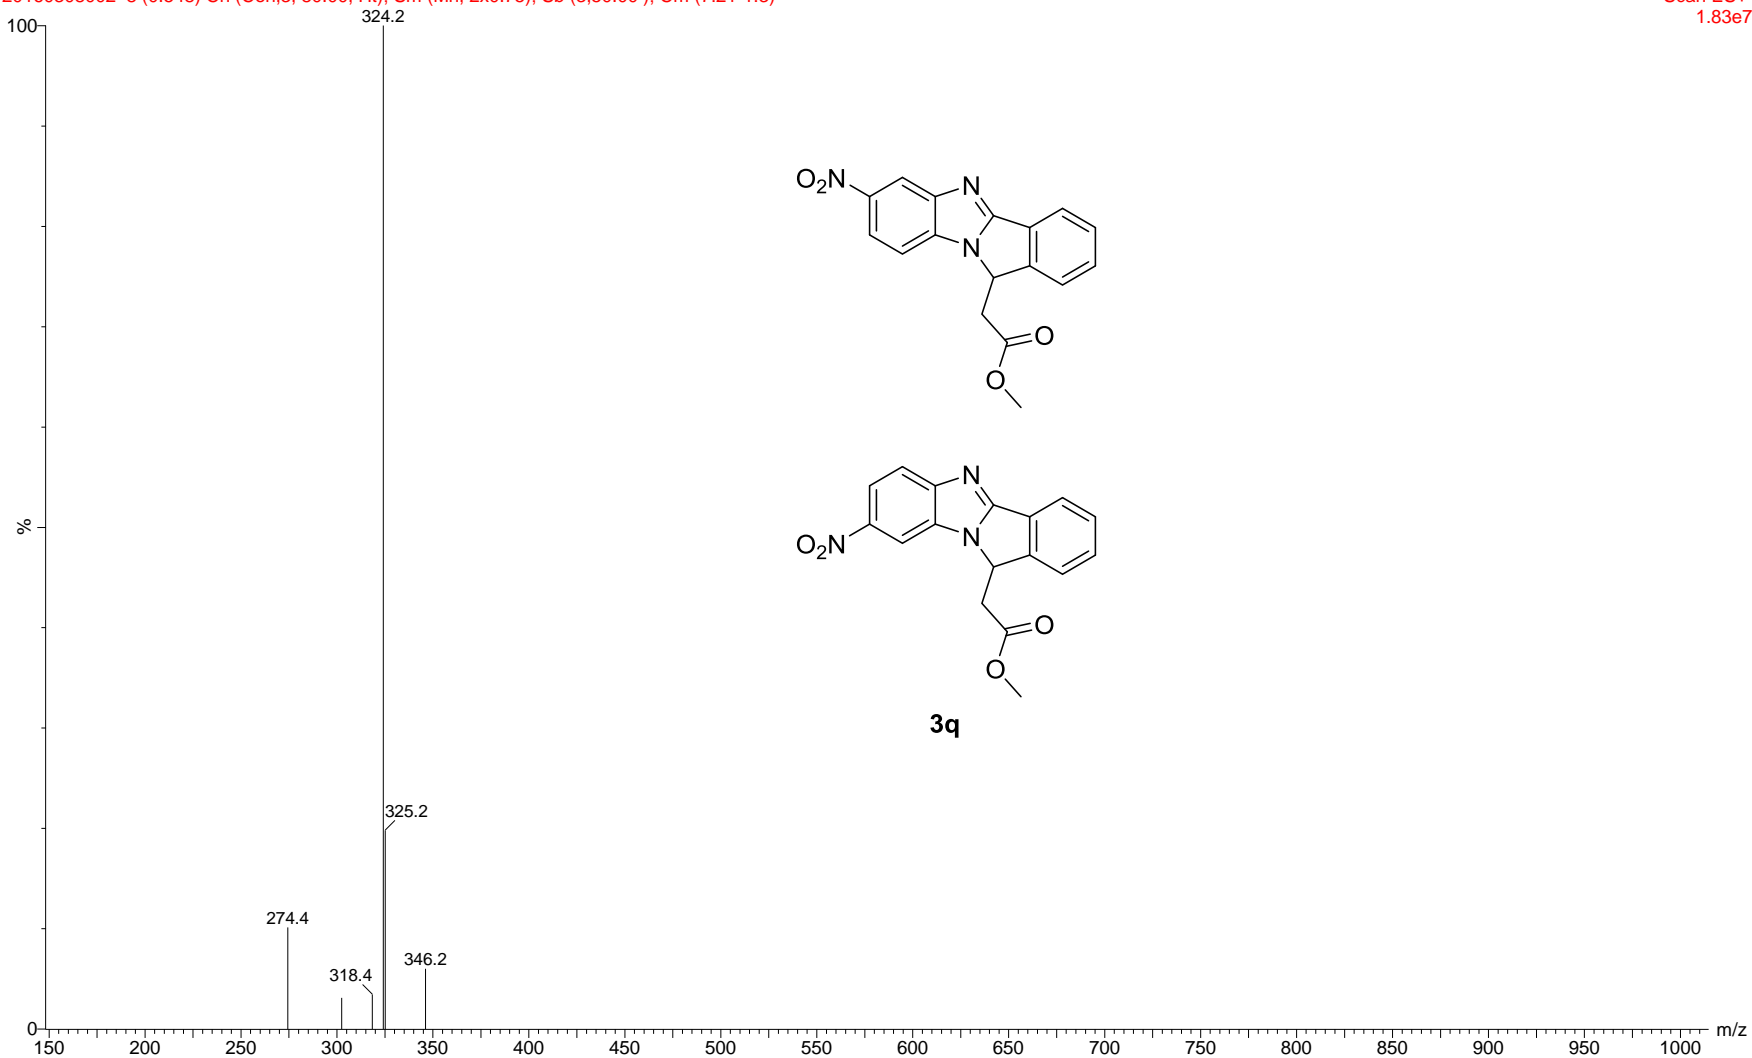



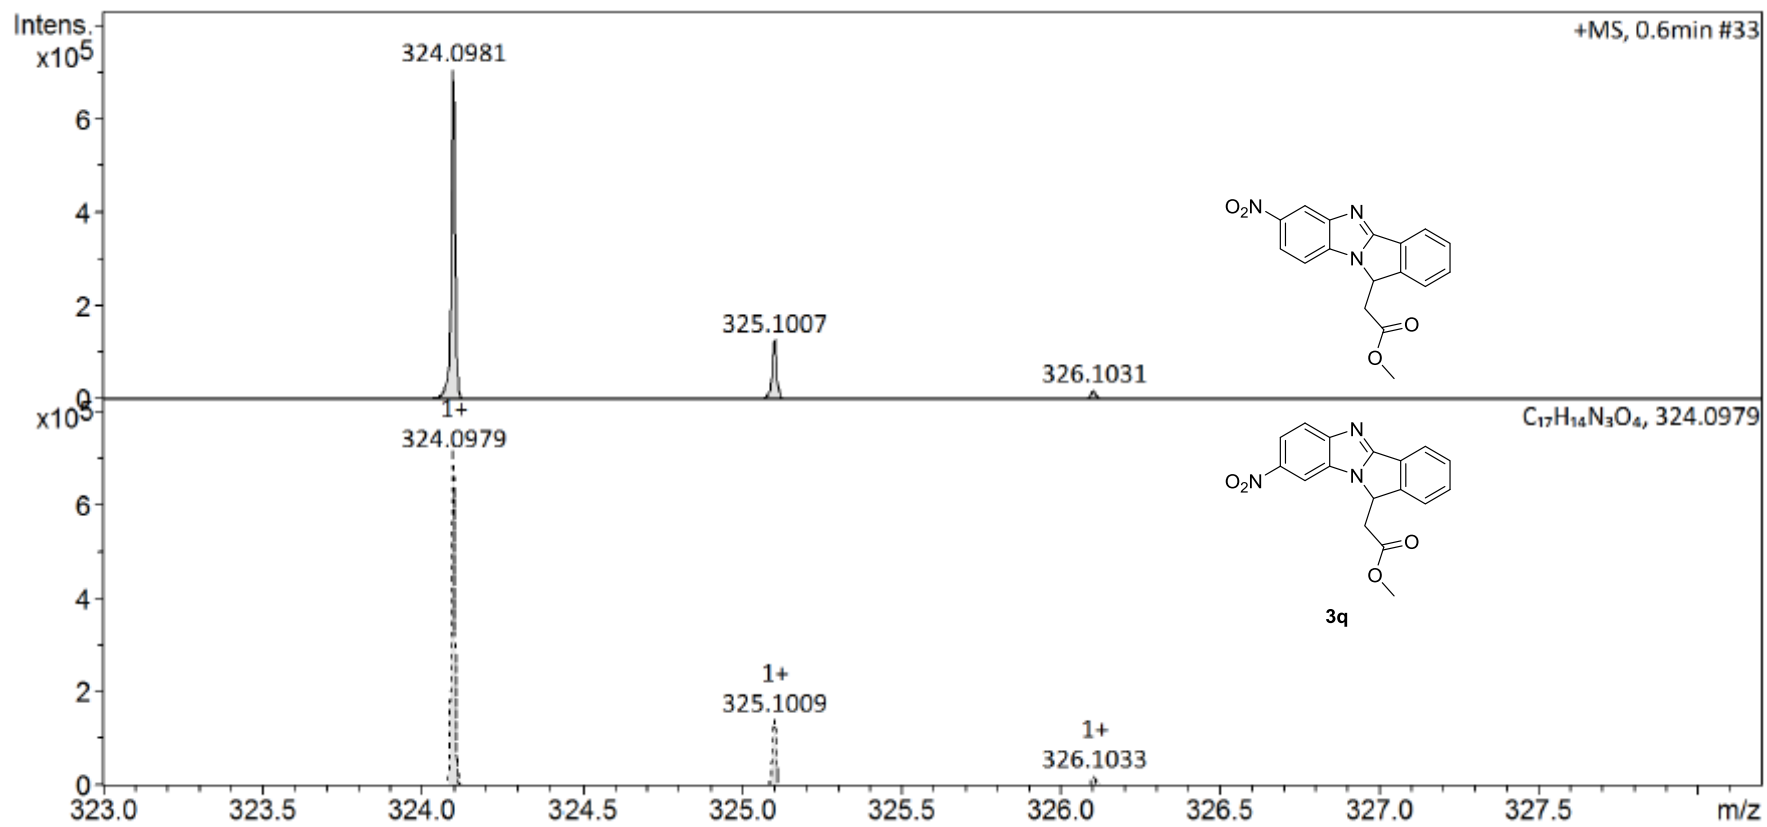

| Meas. m/z | # | Ion Formula                                                   | m/z      | err [ppm] | mSigma | # Sigma | Score  | rdb  | e <sup>-</sup> Conf | N-Rule | Adduct |
|-----------|---|---------------------------------------------------------------|----------|-----------|--------|---------|--------|------|---------------------|--------|--------|
| 324.0981  | 1 | C <sub>17</sub> H <sub>14</sub> N <sub>3</sub> O <sub>4</sub> | 324.0979 | 0.5       | 12.5   | 1       | 100.00 | 12.5 | even                | ok     | M+H    |

High resolution mass (ESI)<sup>+</sup> spectrum of compound of **3q**

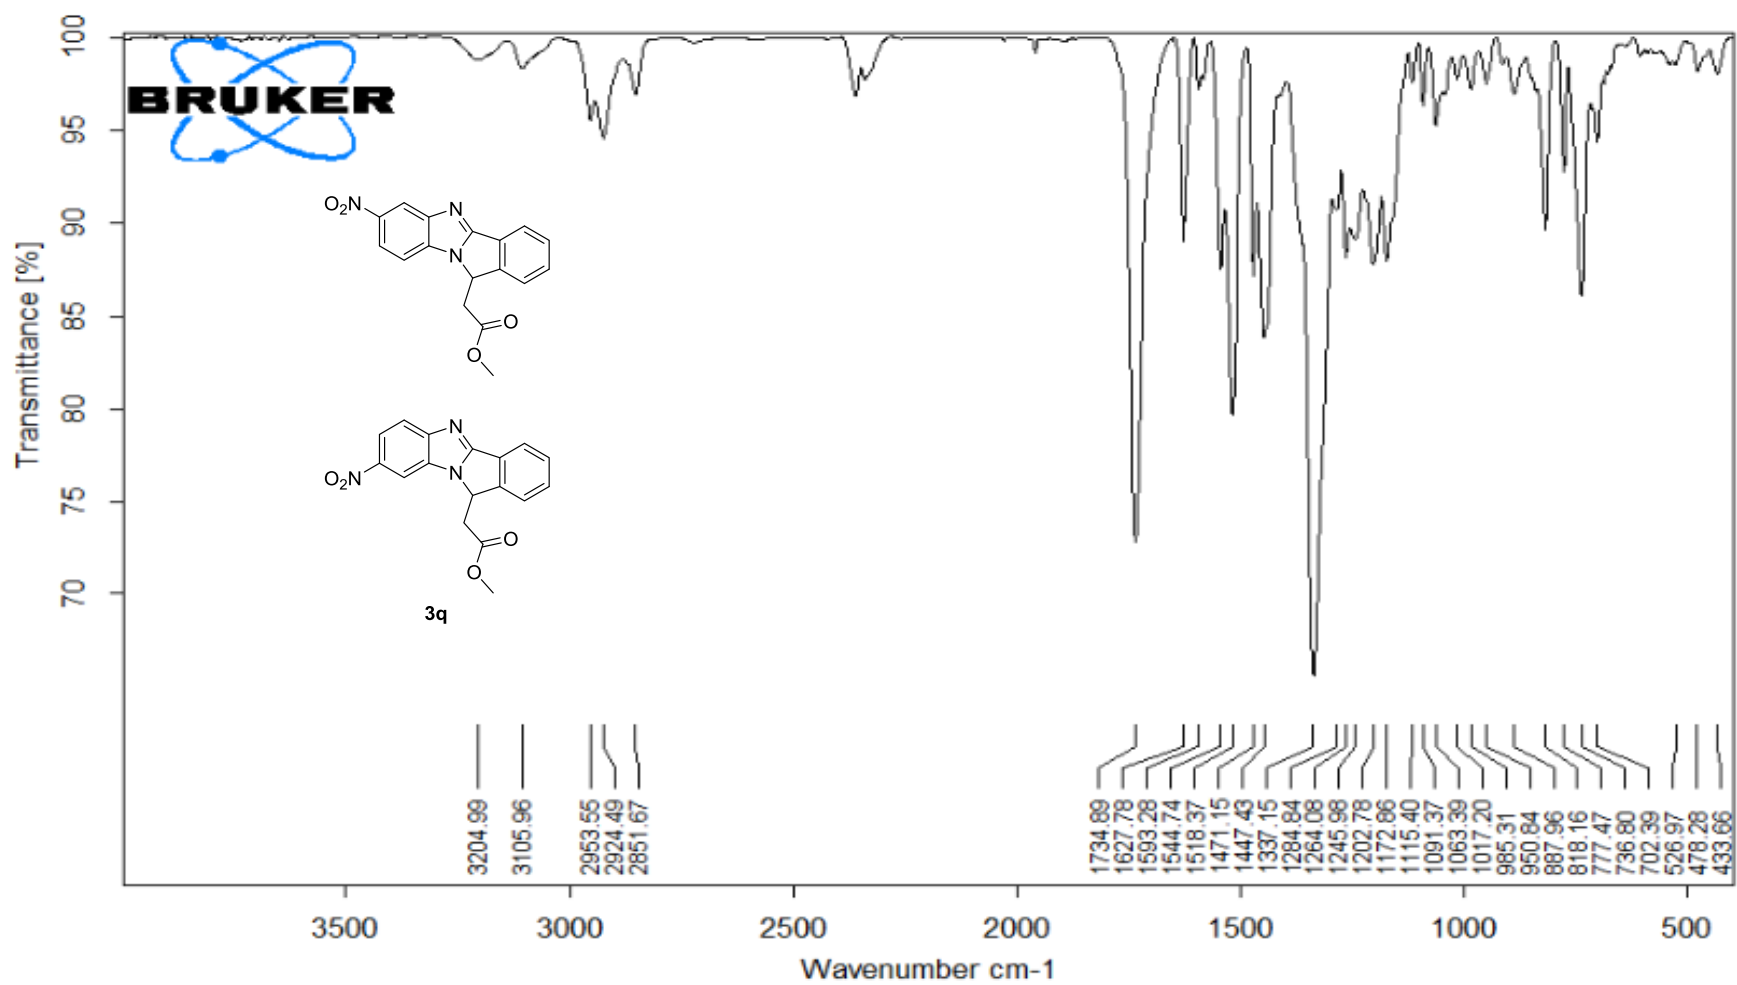

IR spectrum of compound of **3q**

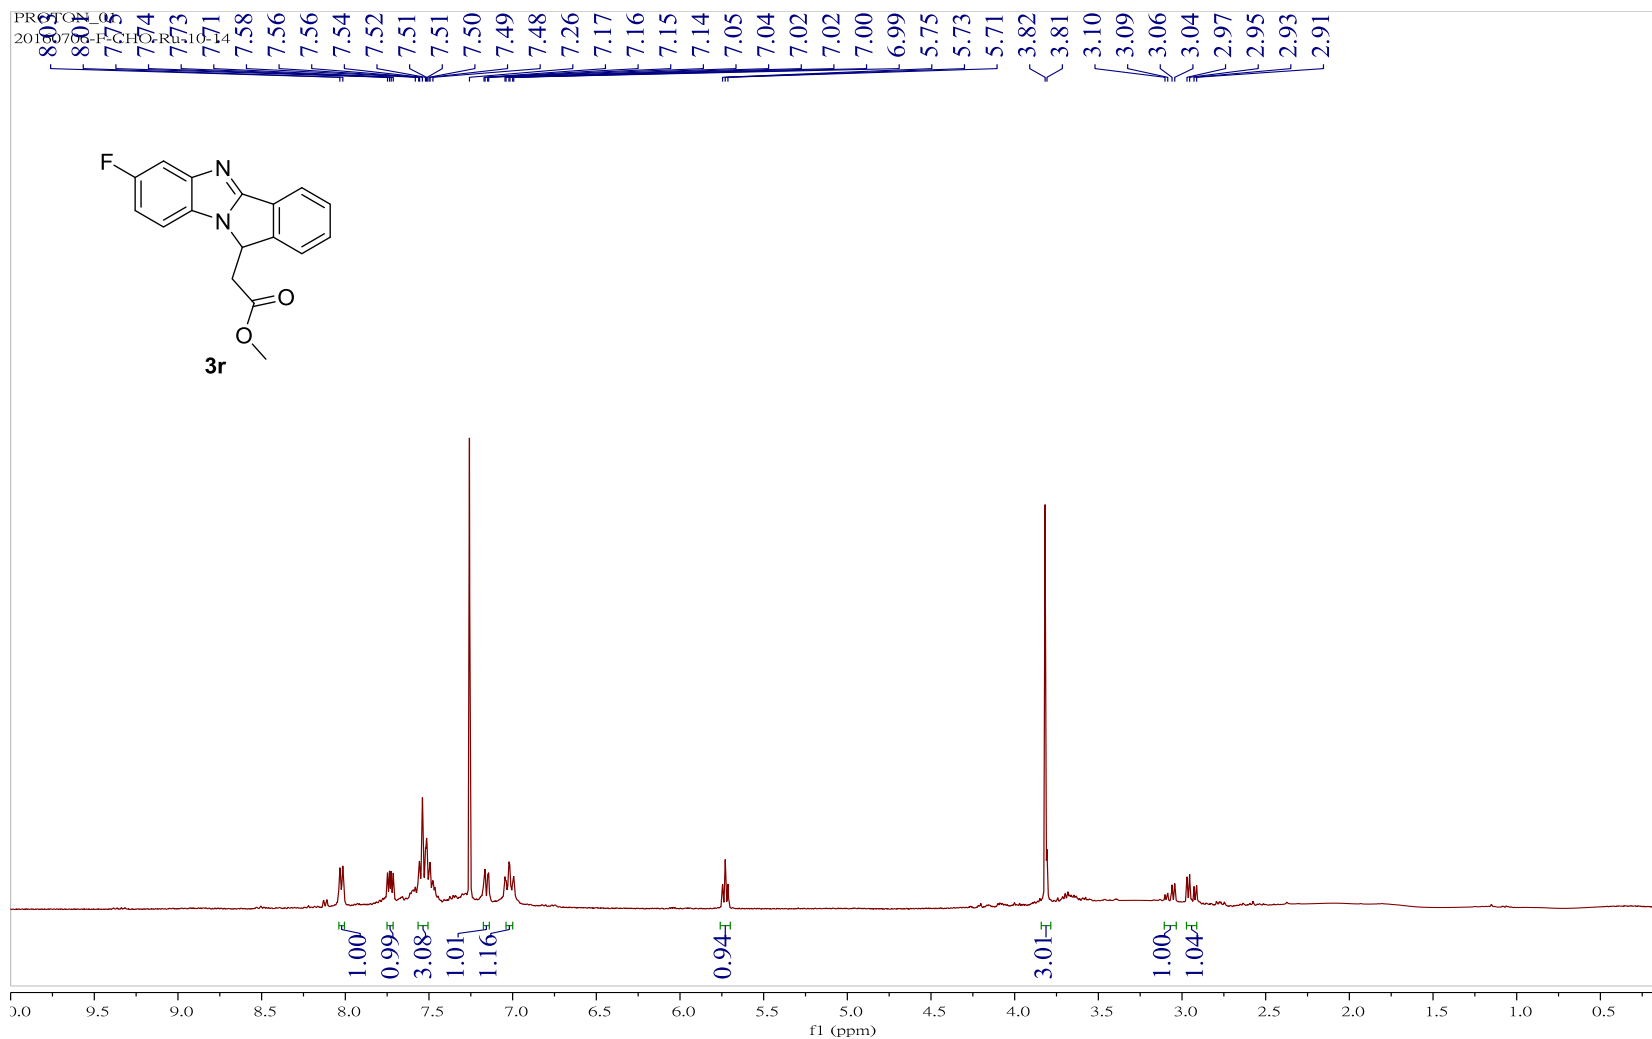

<sup>1</sup>H NMR Spectrum (400 MHz) of compound **3r** in CDCl<sub>3</sub>

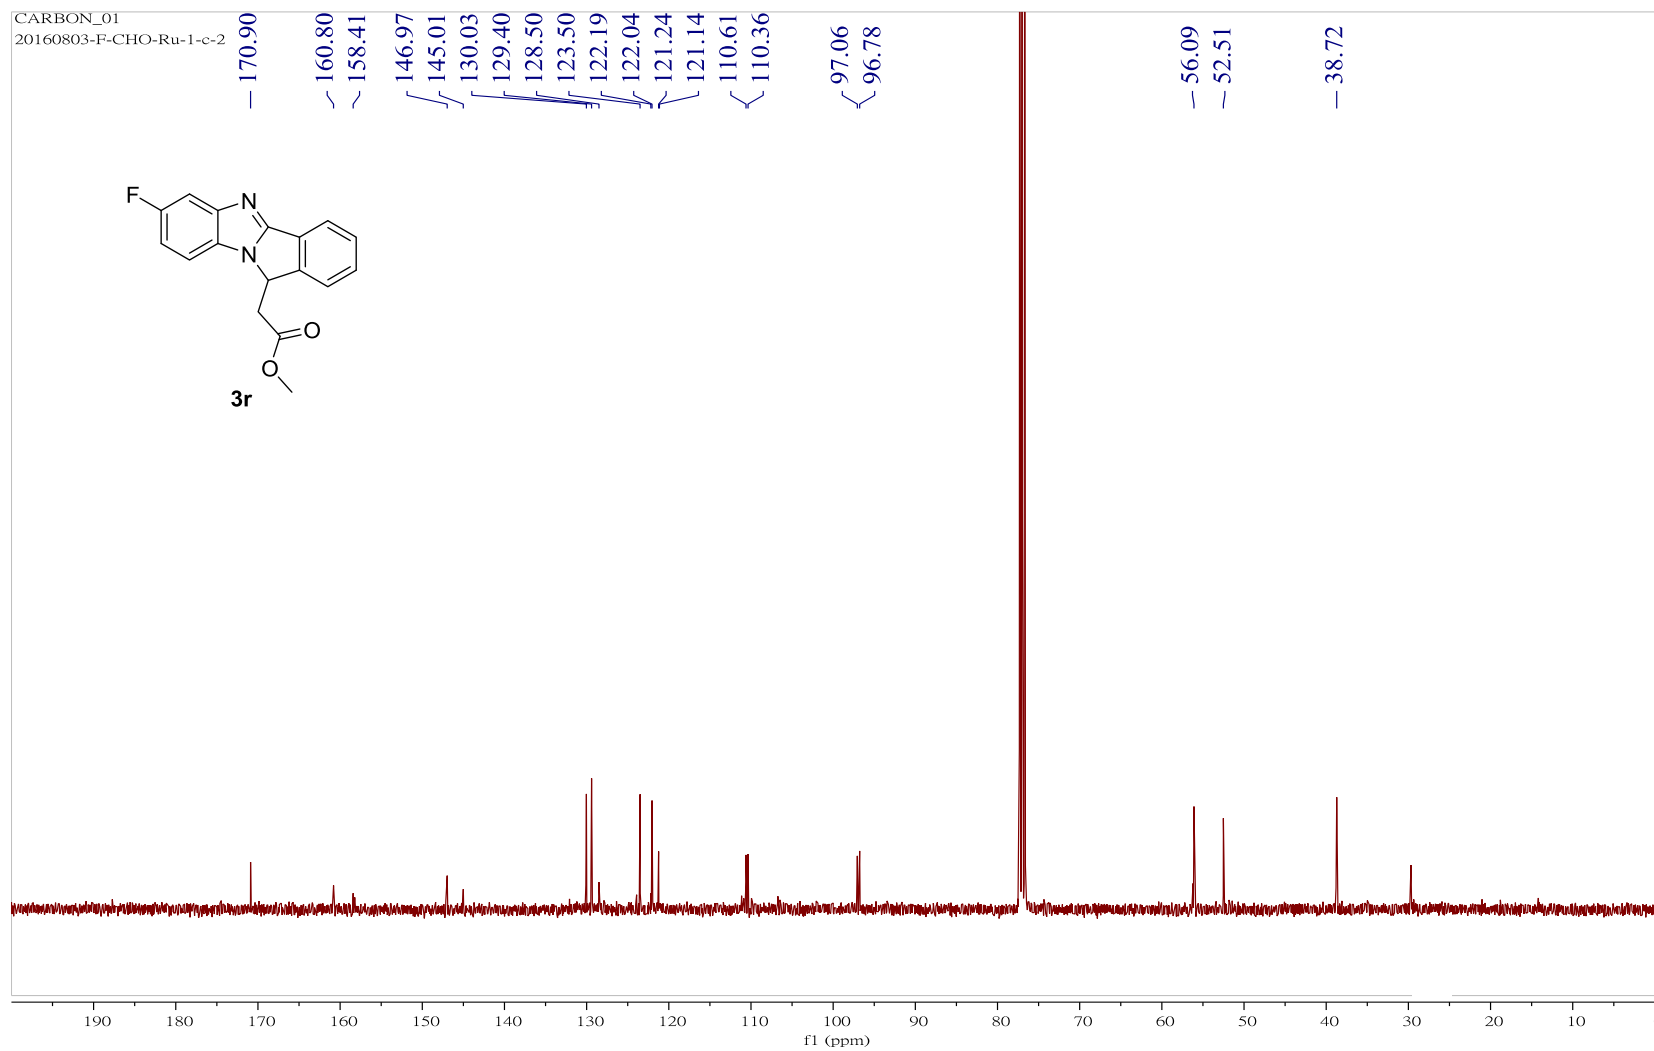

$^{13}\text{C}$  NMR Spectrum (100 MHz) of compound **3r** in  $\text{CDCl}_3$

**F-CHO-Ru**

20160805004 35 (2.397) Cn (Cen,3, 80.00, Ht); Sm (Mn, 2x0.75); Sb (3,50.00); Cm (34:39-3:8)

Scan ES+  
3.67e7

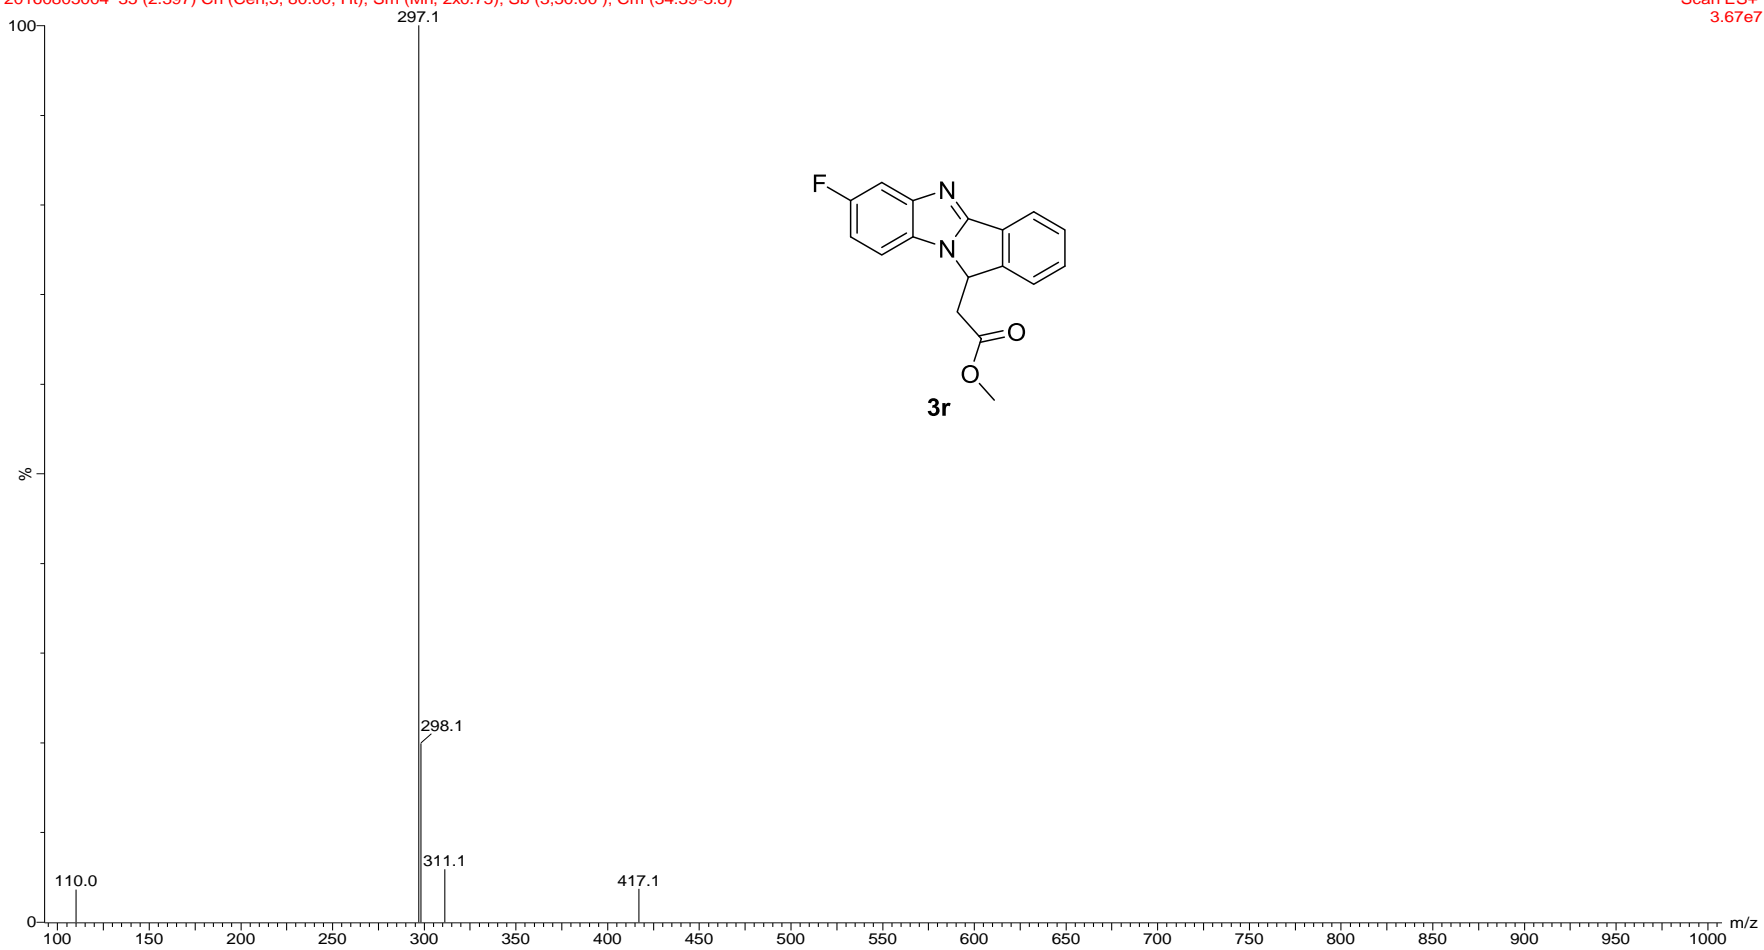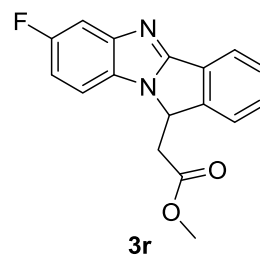

ESI<sup>+</sup> Mass spectrum of compound **3r**

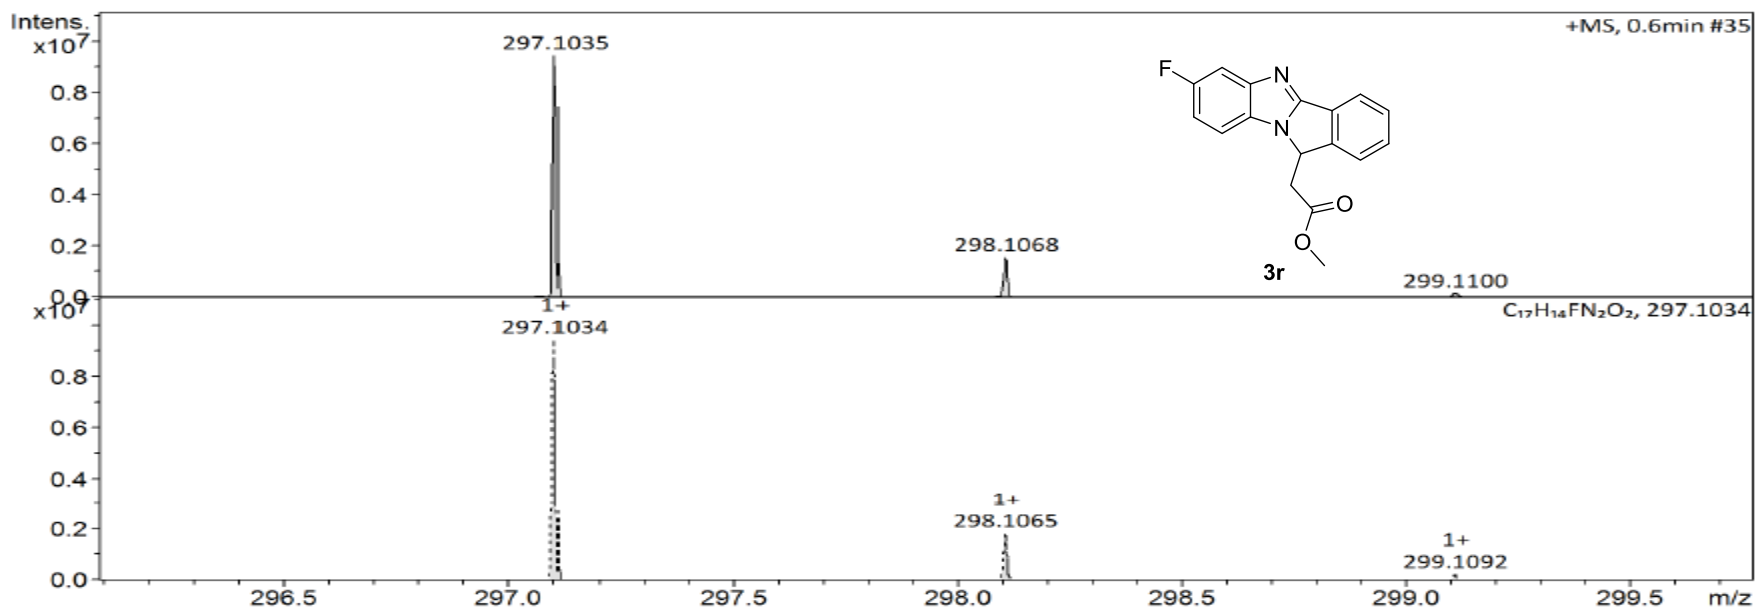

| Meas. m/z | # | Ion Formula                                                    | m/z      | err [ppm] | mSigma | # Sigma | Score  | rdb  | e <sup>-</sup> Conf | N-Rule | Adduct |
|-----------|---|----------------------------------------------------------------|----------|-----------|--------|---------|--------|------|---------------------|--------|--------|
| 297.1035  | 1 | C <sub>17</sub> H <sub>14</sub> FN <sub>2</sub> O <sub>2</sub> | 297.1034 | -0.2      | 17.2   | 1       | 100.00 | 11.5 | even                | ok     | M+H    |

High resolution mass (ESI)<sup>+</sup> spectrum of compound of **3r**

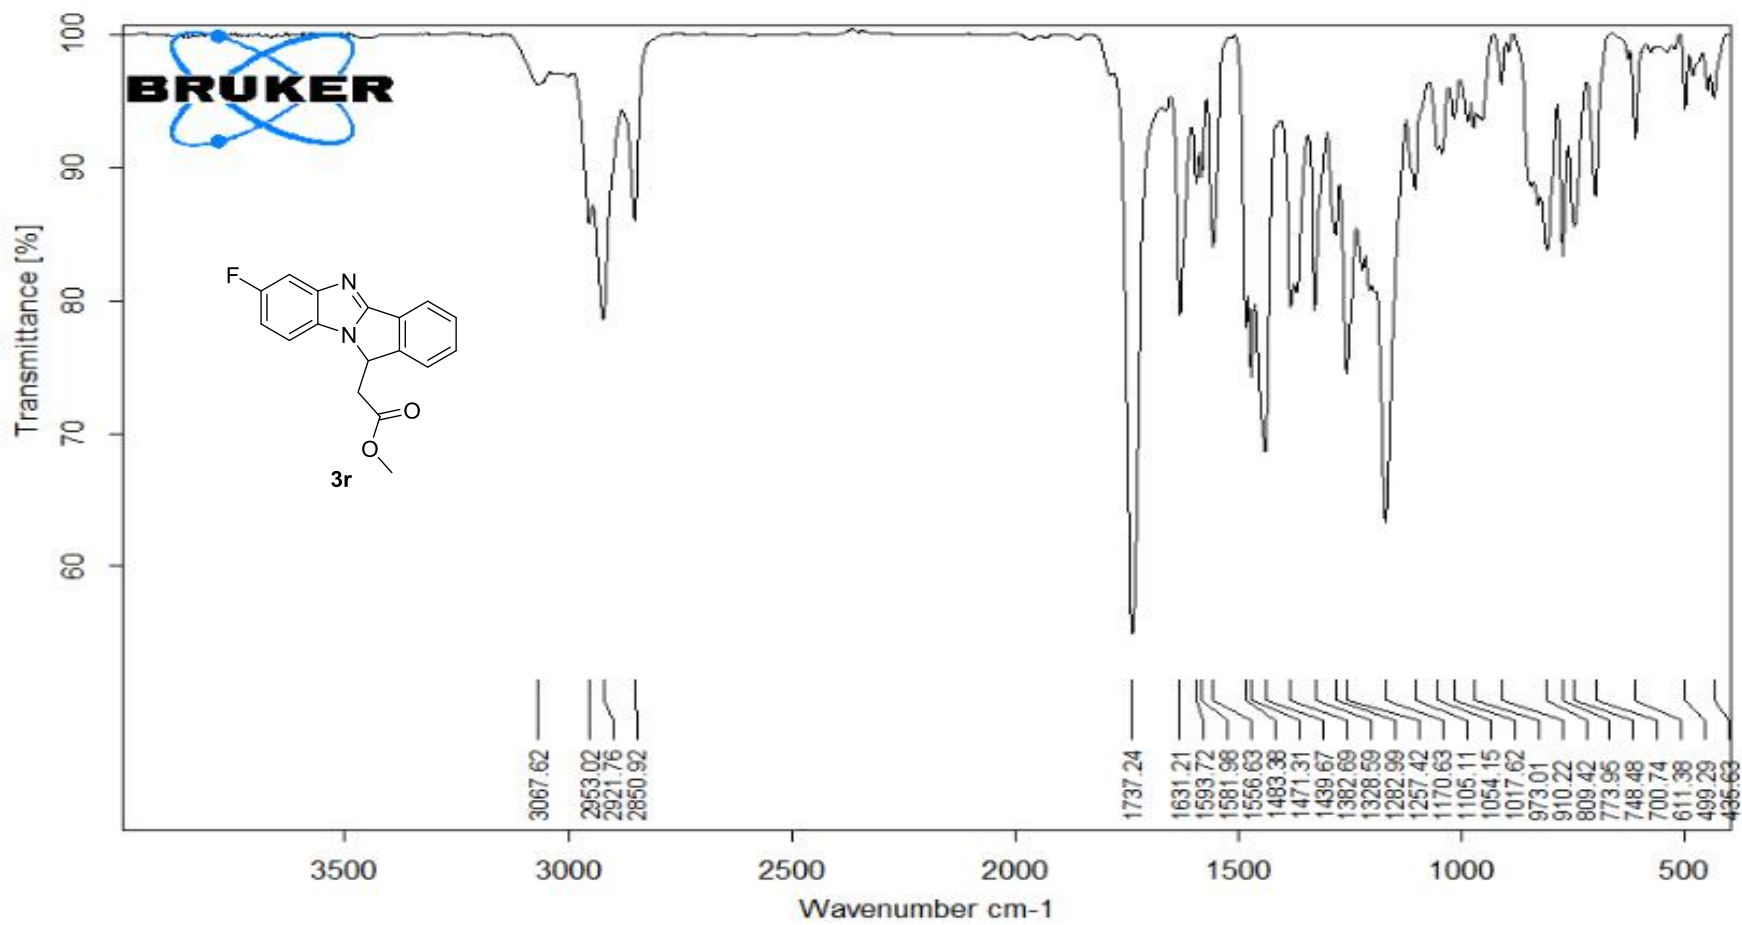

IR spectrum of compound of **3r**

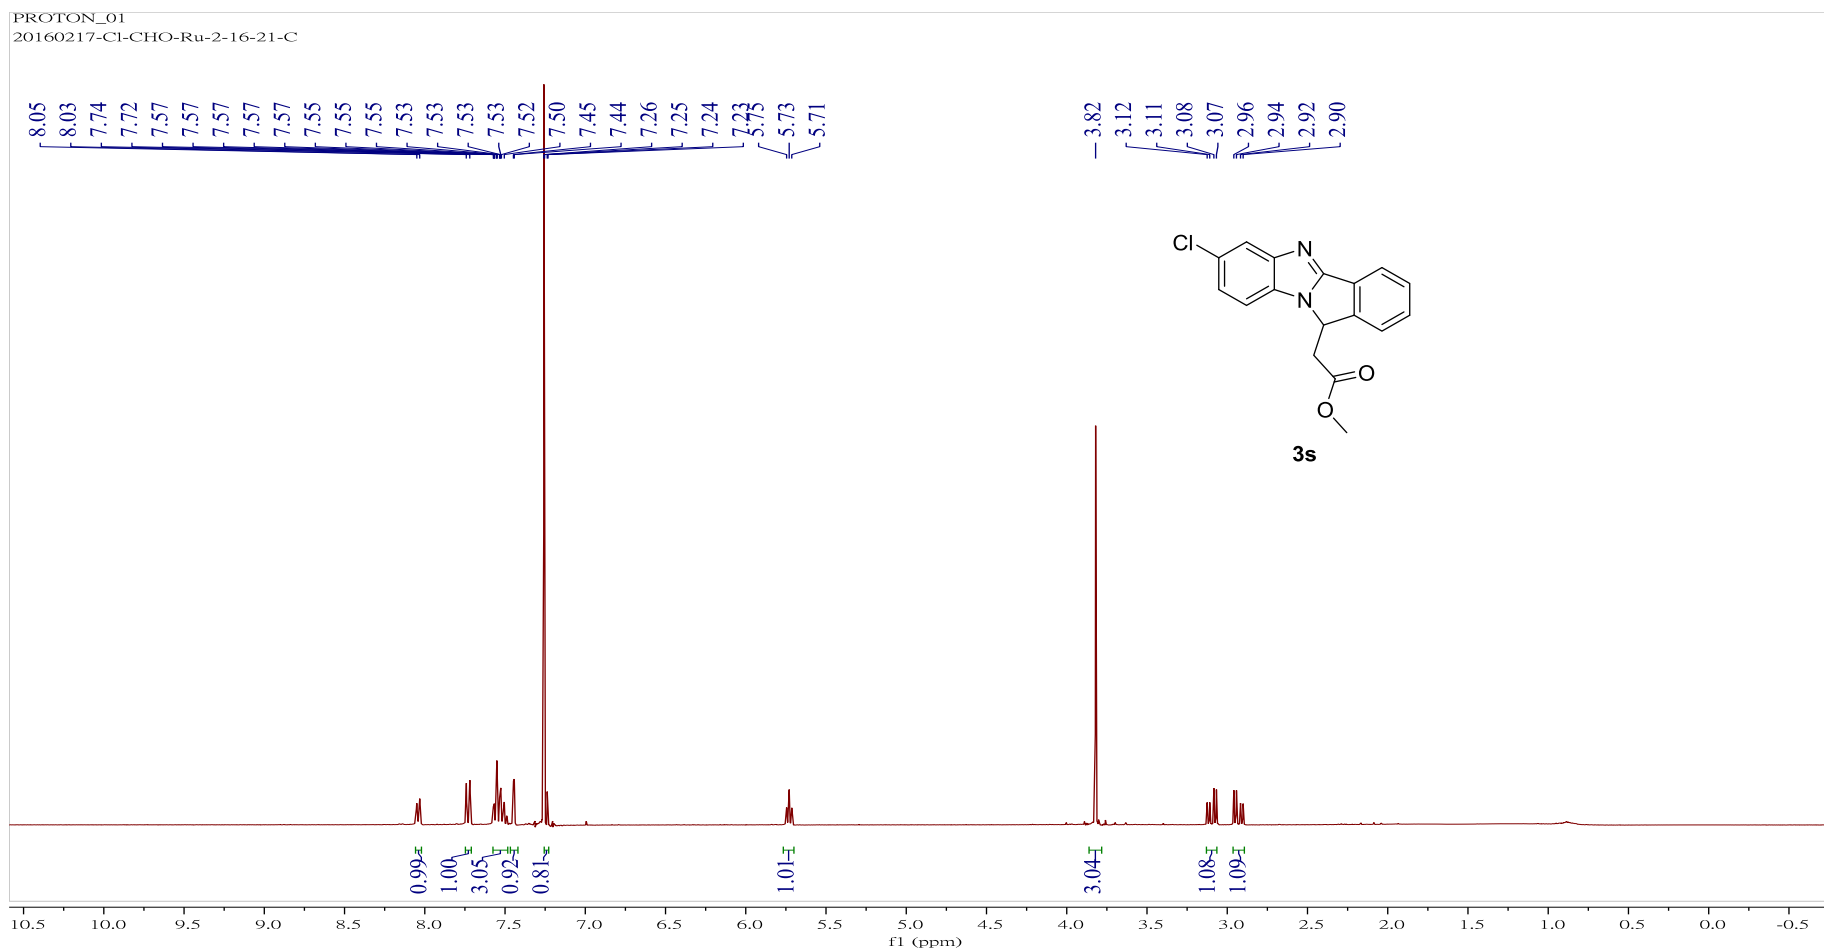

$^1\text{H}$  NMR Spectrum (400 MHz) of compound **3s** in  $\text{CDCl}_3$



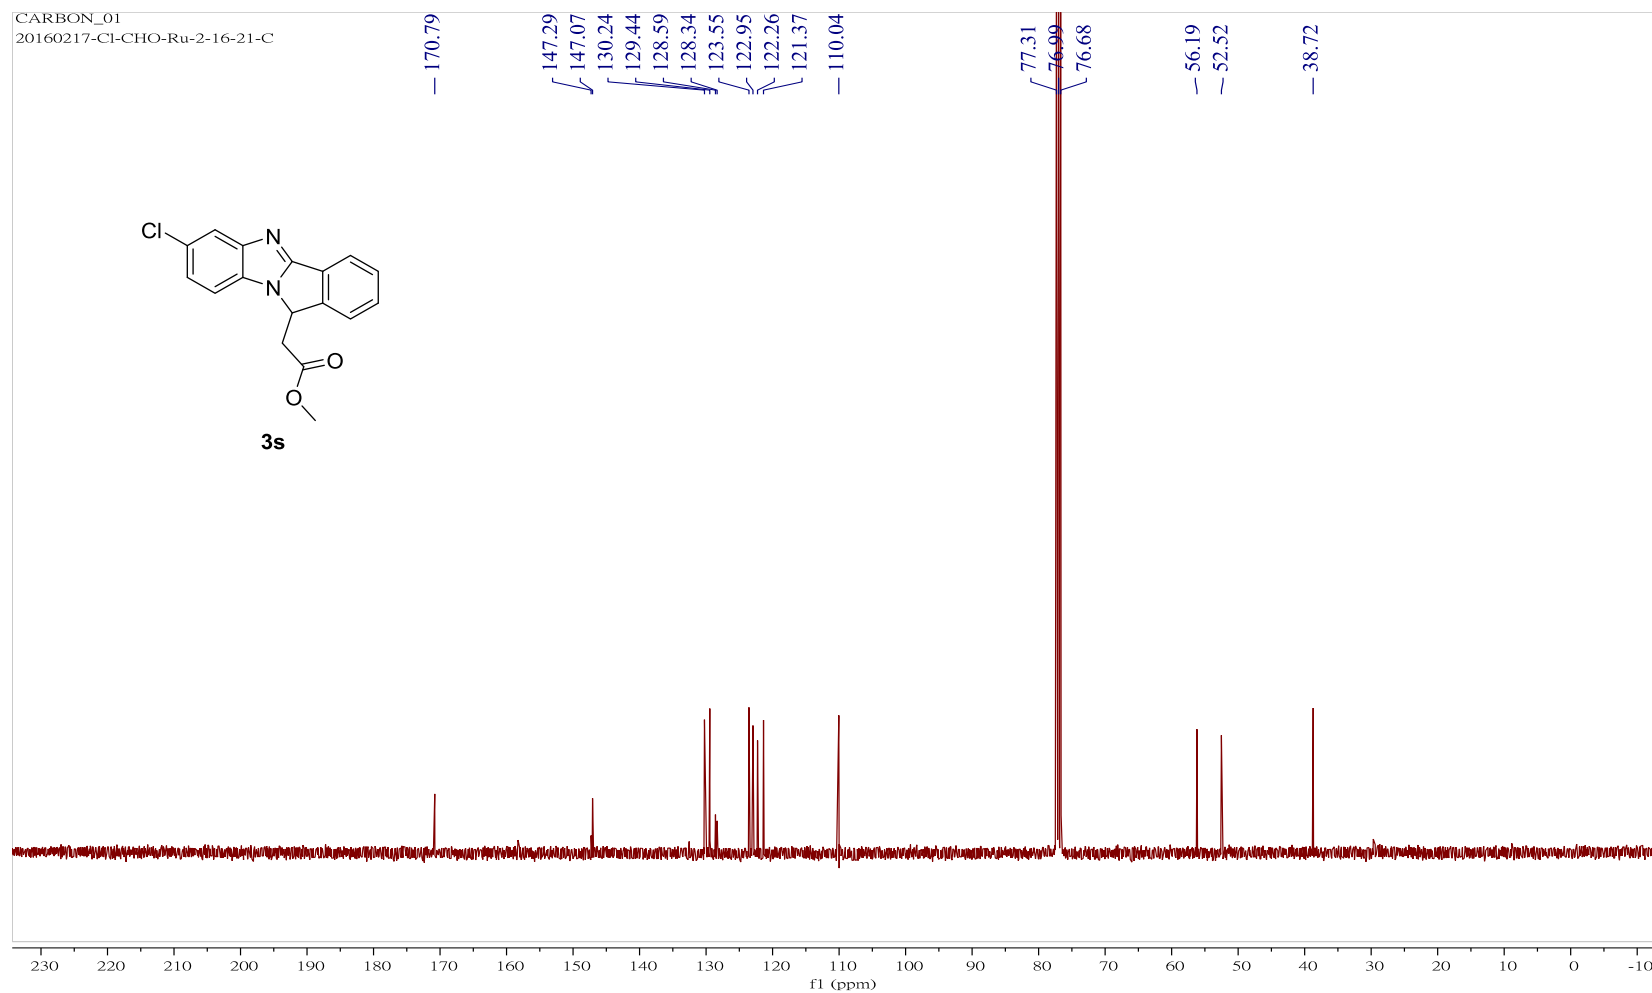

$^{13}\text{C}$  NMR Spectrum (100 MHz) of compound **3s** in  $\text{CDCl}_3$

**Cl-CHO-Ru-2-16-F**

20160217040 40 (2.740) Cn (Cen,3, 80.00, Ht); Sm (Mn, 2x0.75); Sb (3,50.00 ); Cm (39:42-1:21)

Scan ES+  
5.60e7

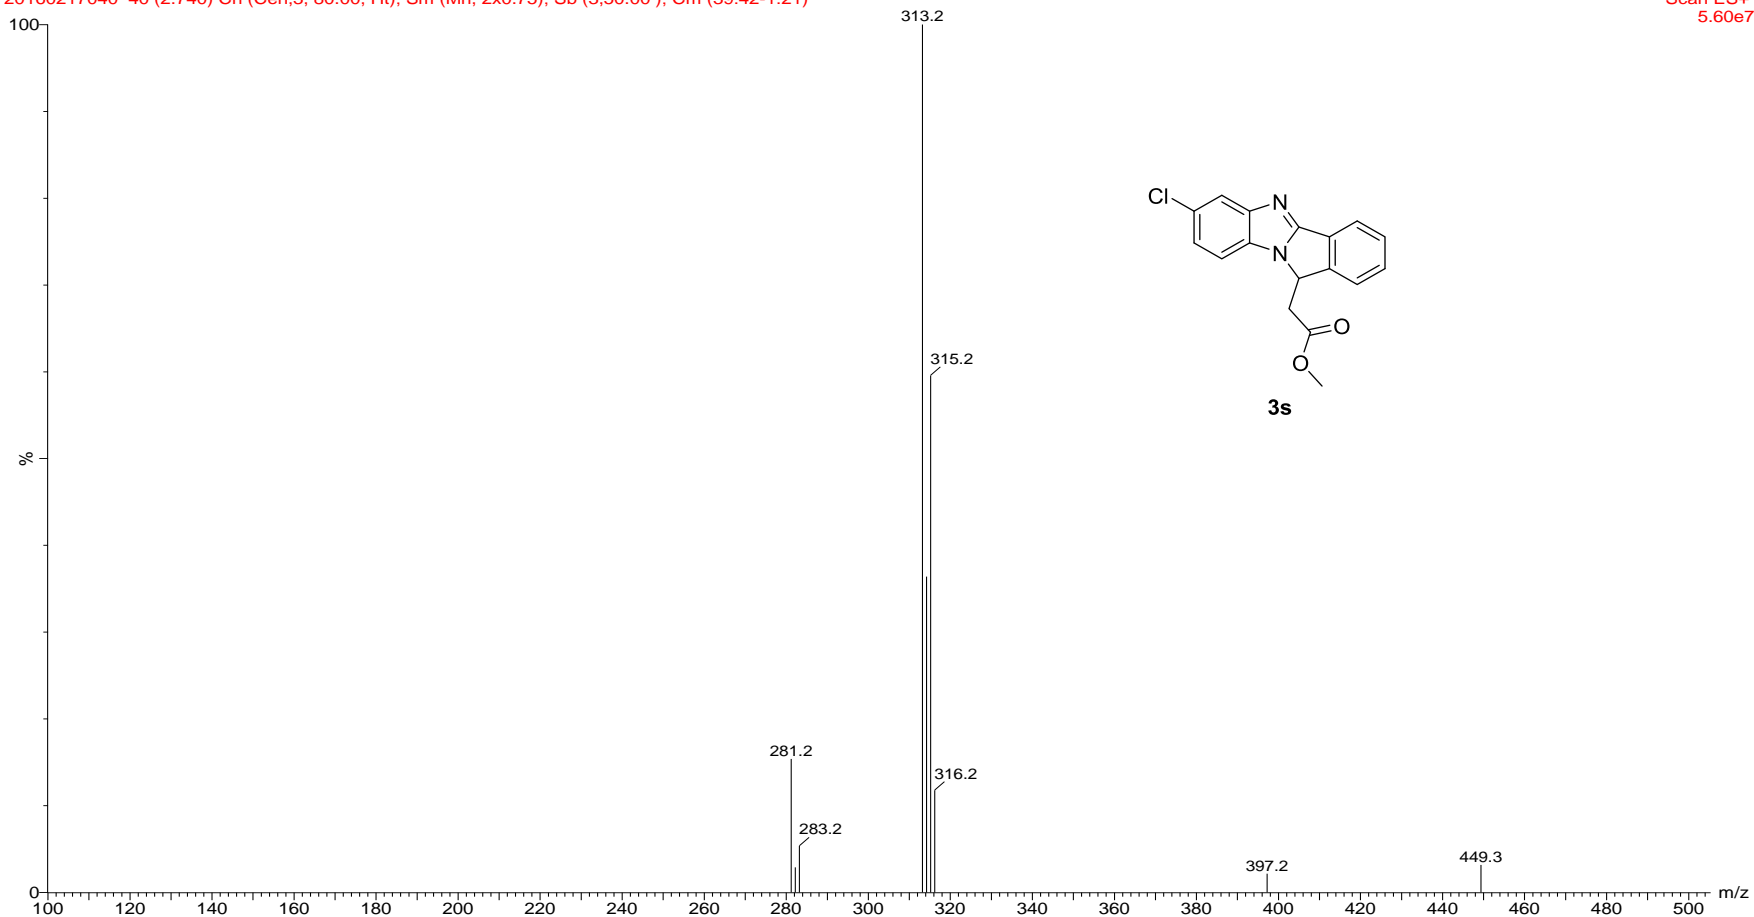

ESI<sup>+</sup> Mass spectrum of compound **3s**

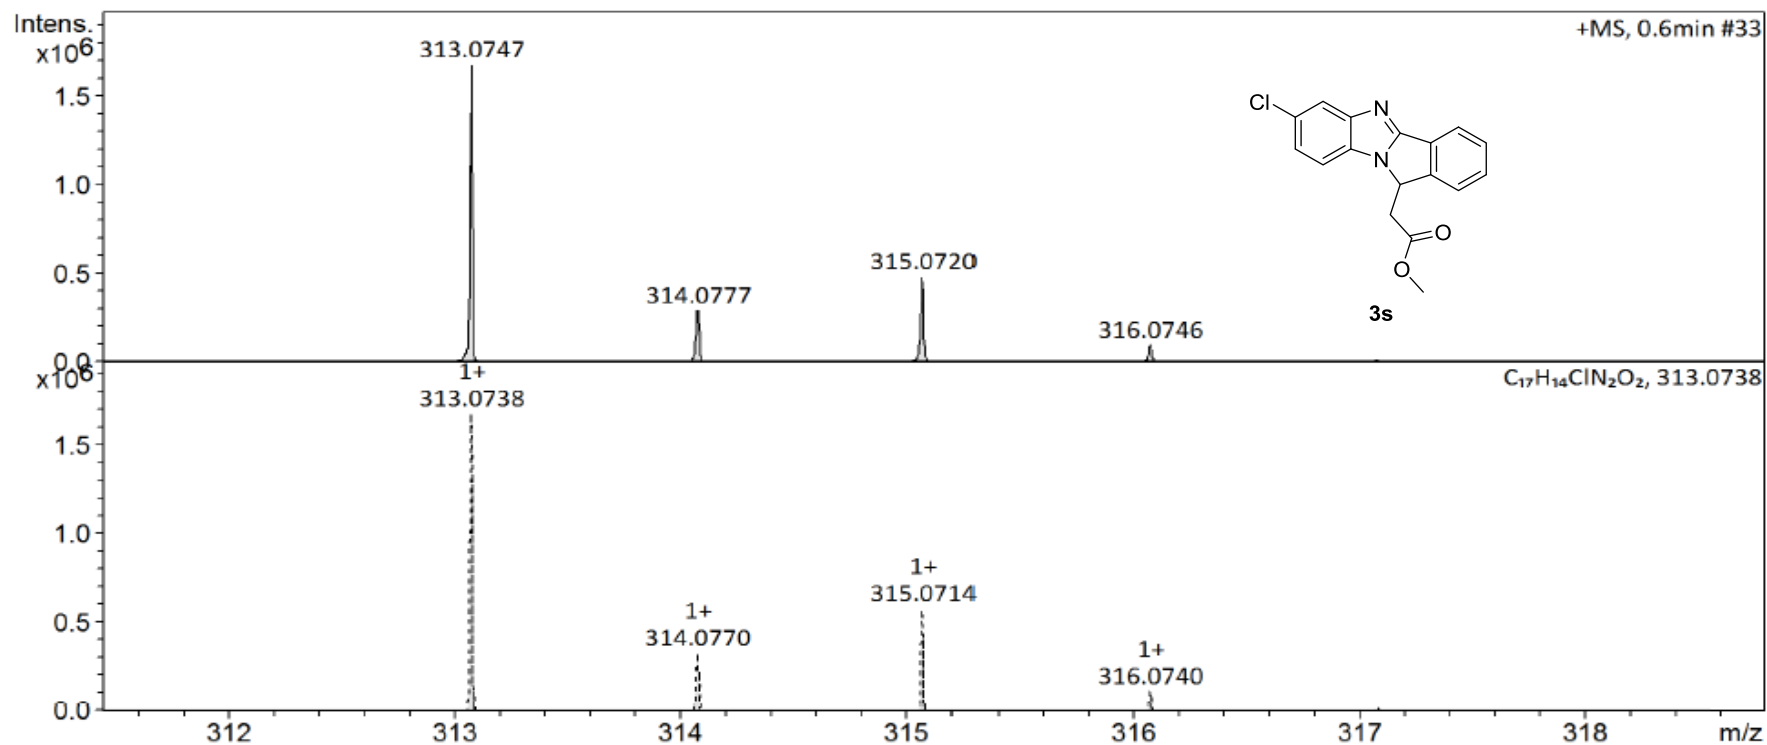

| Meas. m/z | # | Ion Formula                                                     | m/z      | err [ppm] | mSigma | # Sigma | Score  | rdb  | e <sup>-</sup> Conf | N-Rule | Adduct |
|-----------|---|-----------------------------------------------------------------|----------|-----------|--------|---------|--------|------|---------------------|--------|--------|
| 313.0747  | 1 | C <sub>17</sub> H <sub>14</sub> ClN <sub>2</sub> O <sub>2</sub> | 313.0738 | -2.8      | 27.1   | 1       | 100.00 | 11.5 | even                | ok     | M+H    |

High resolution mass (ESI)<sup>+</sup> spectrum of compound of **3s**

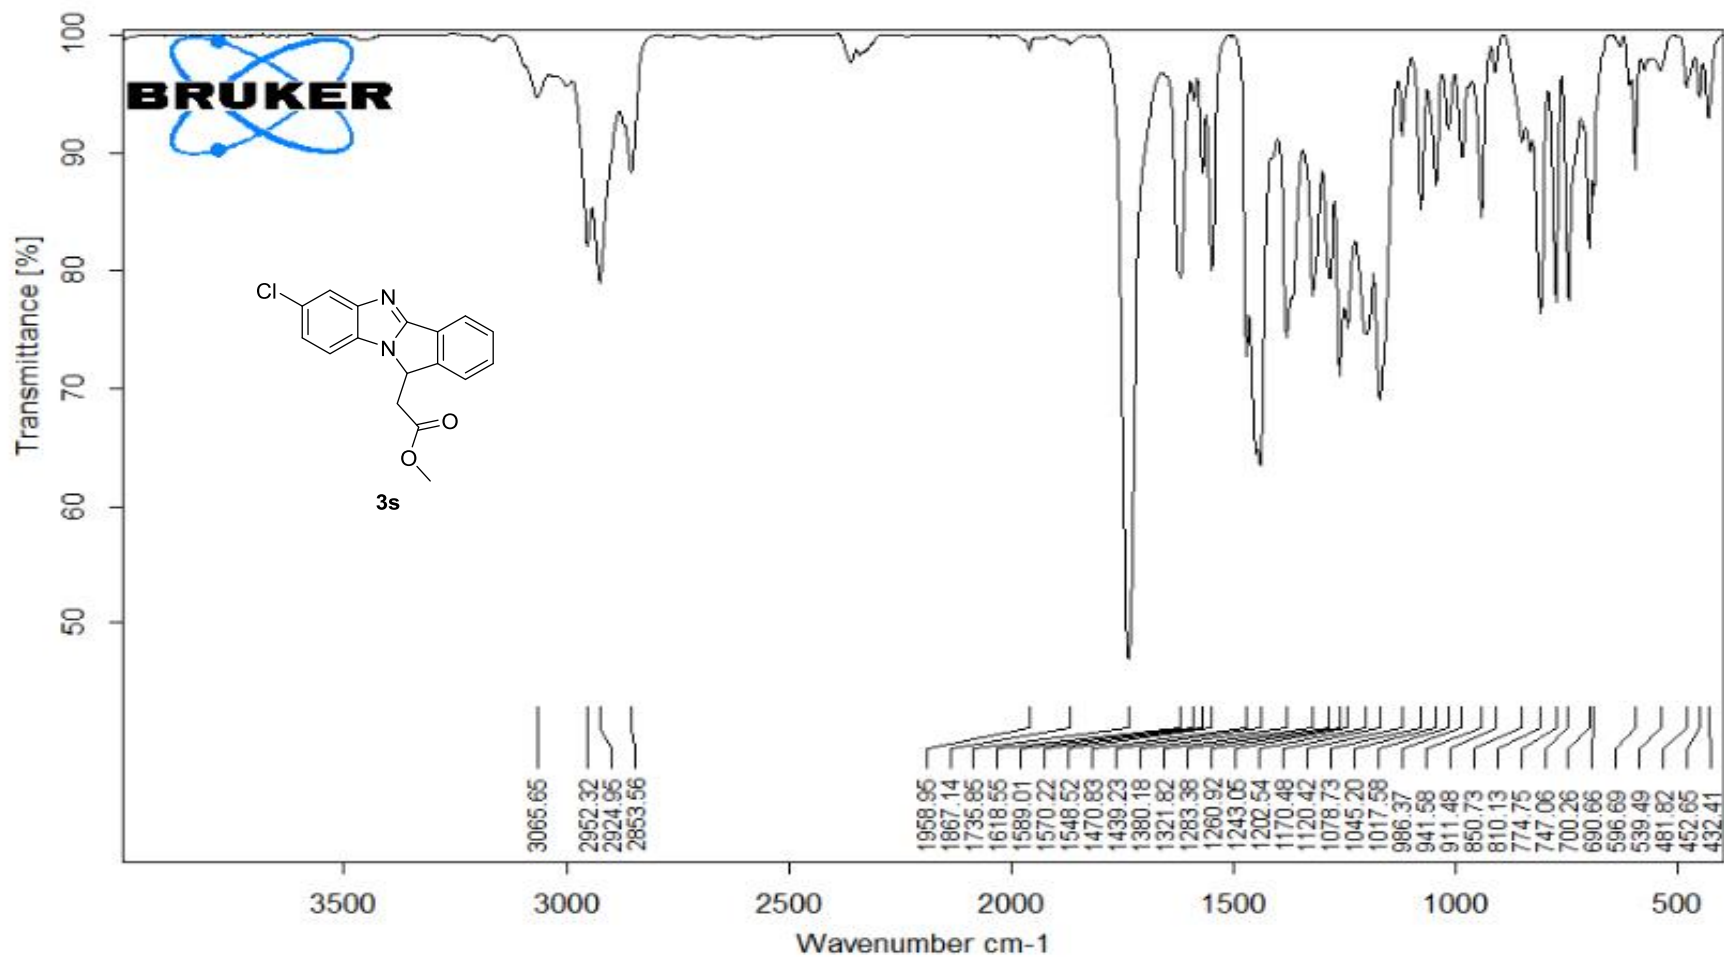

IR spectrum of compound of 3s

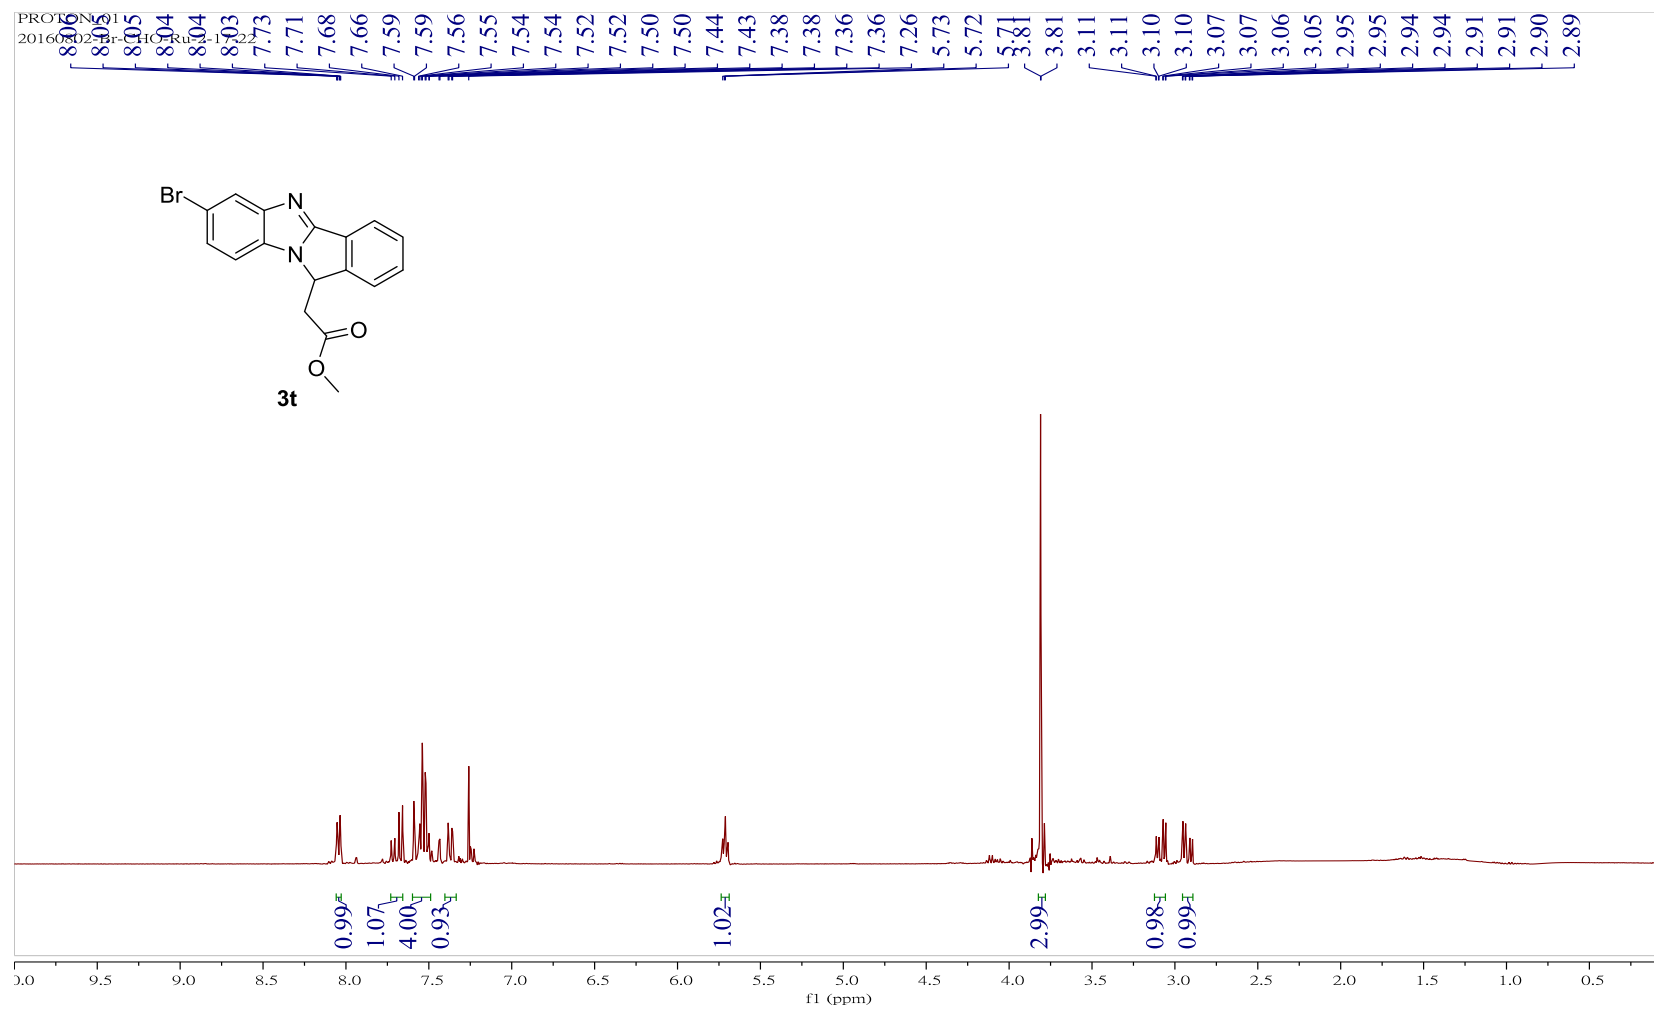

$^1\text{H}$  NMR Spectrum (400 MHz) of compound **3t** in  $\text{CDCl}_3$

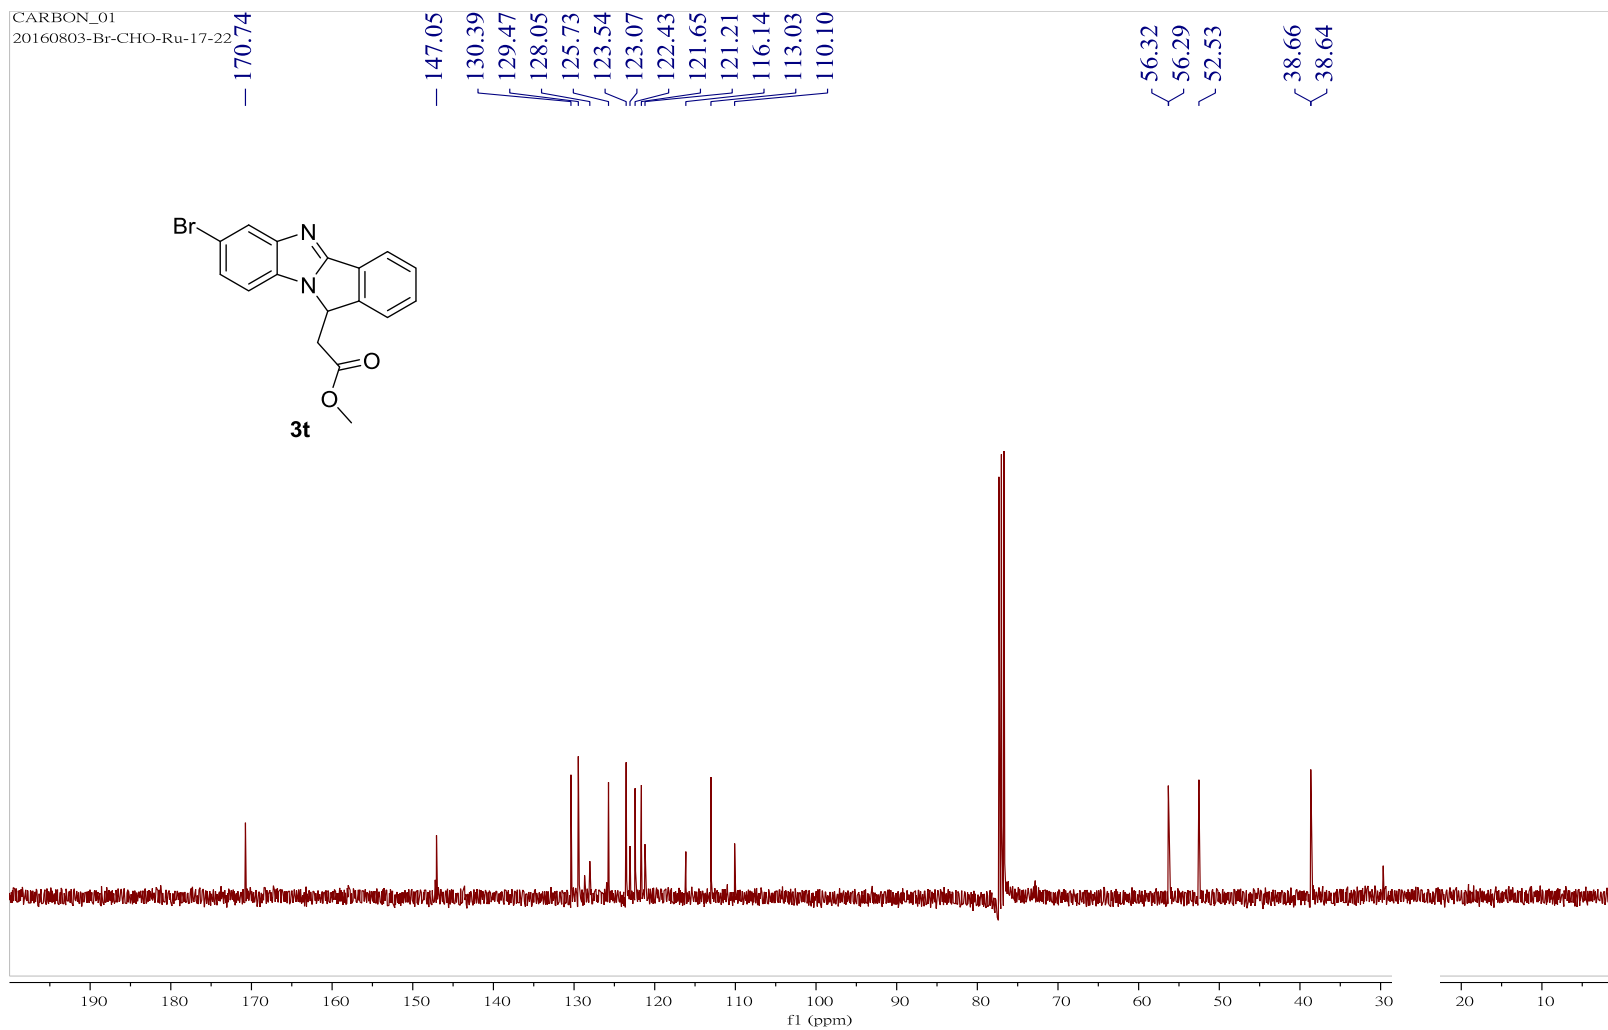

$^{13}\text{C}$  NMR Spectrum (100 MHz) of compound **3t** in  $\text{CDCl}_3$

**Br-CHO-Ru**

201608120017 32 (2.192) Cn (Cen,3, 80.00, Ht); Sm (Mn, 2x0.75); Sb (3,50.00); Cm (30:36-3:9)

Scan ES+  
2.11e7

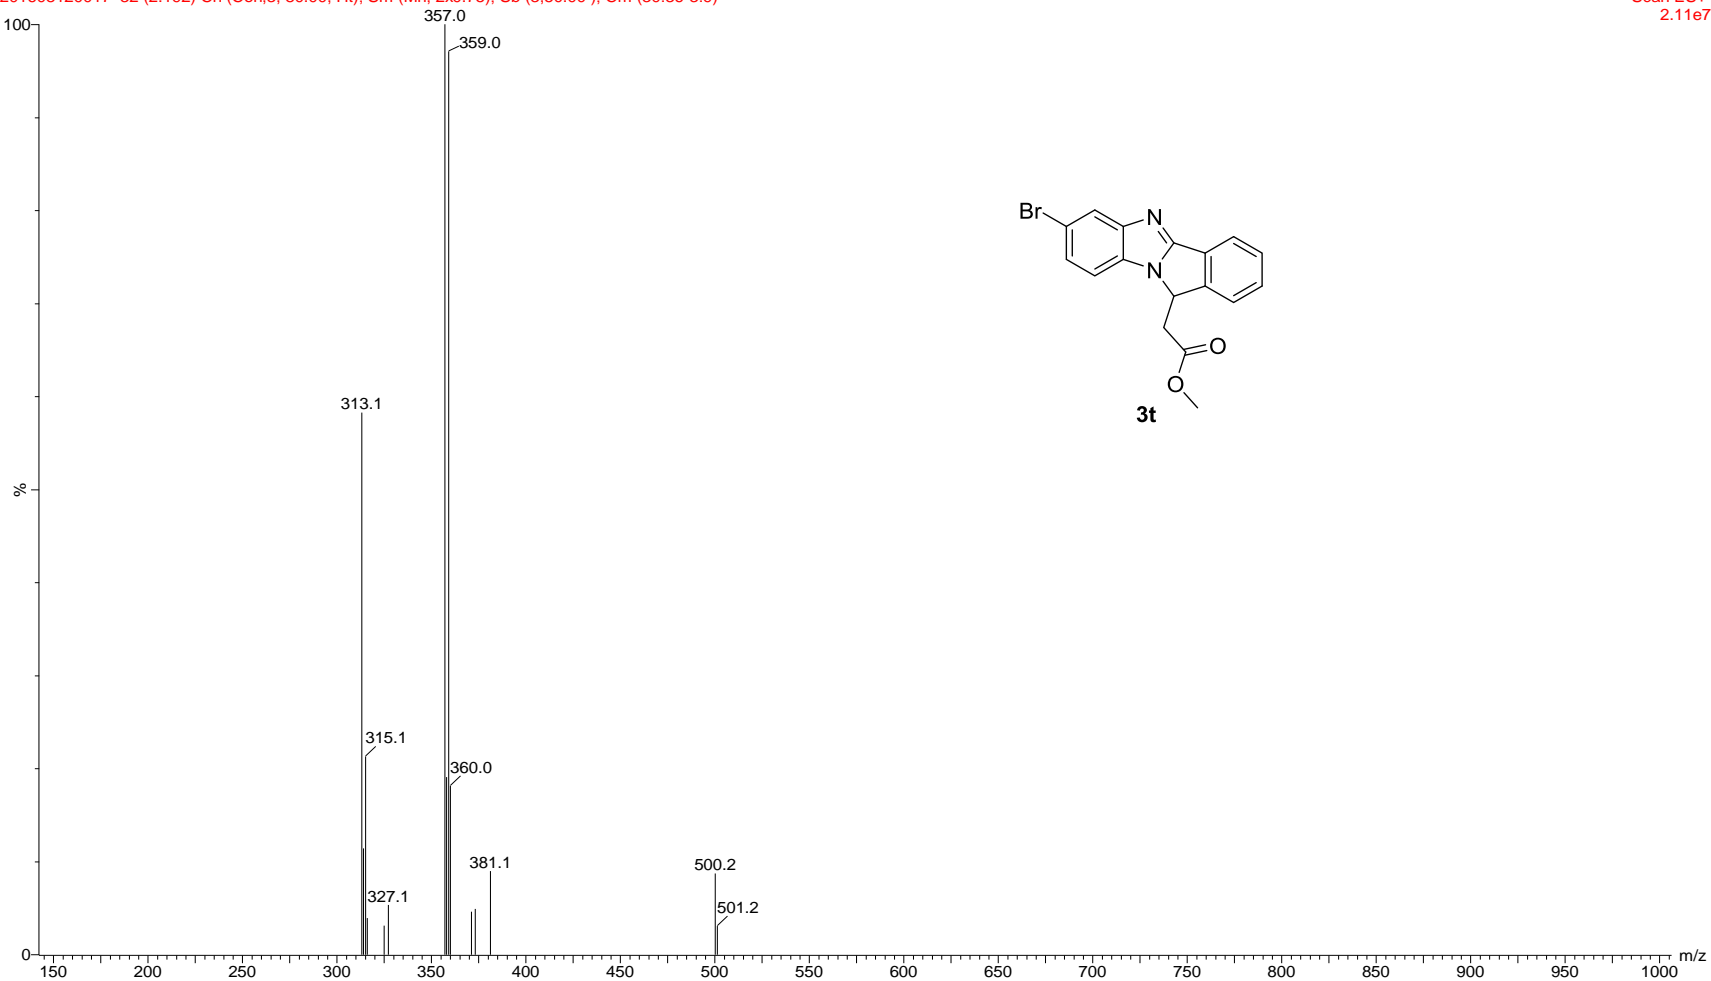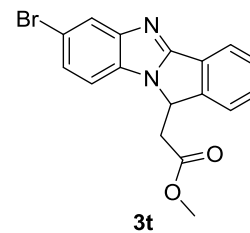

ESI<sup>+</sup> Mass spectrum of compound **3t**

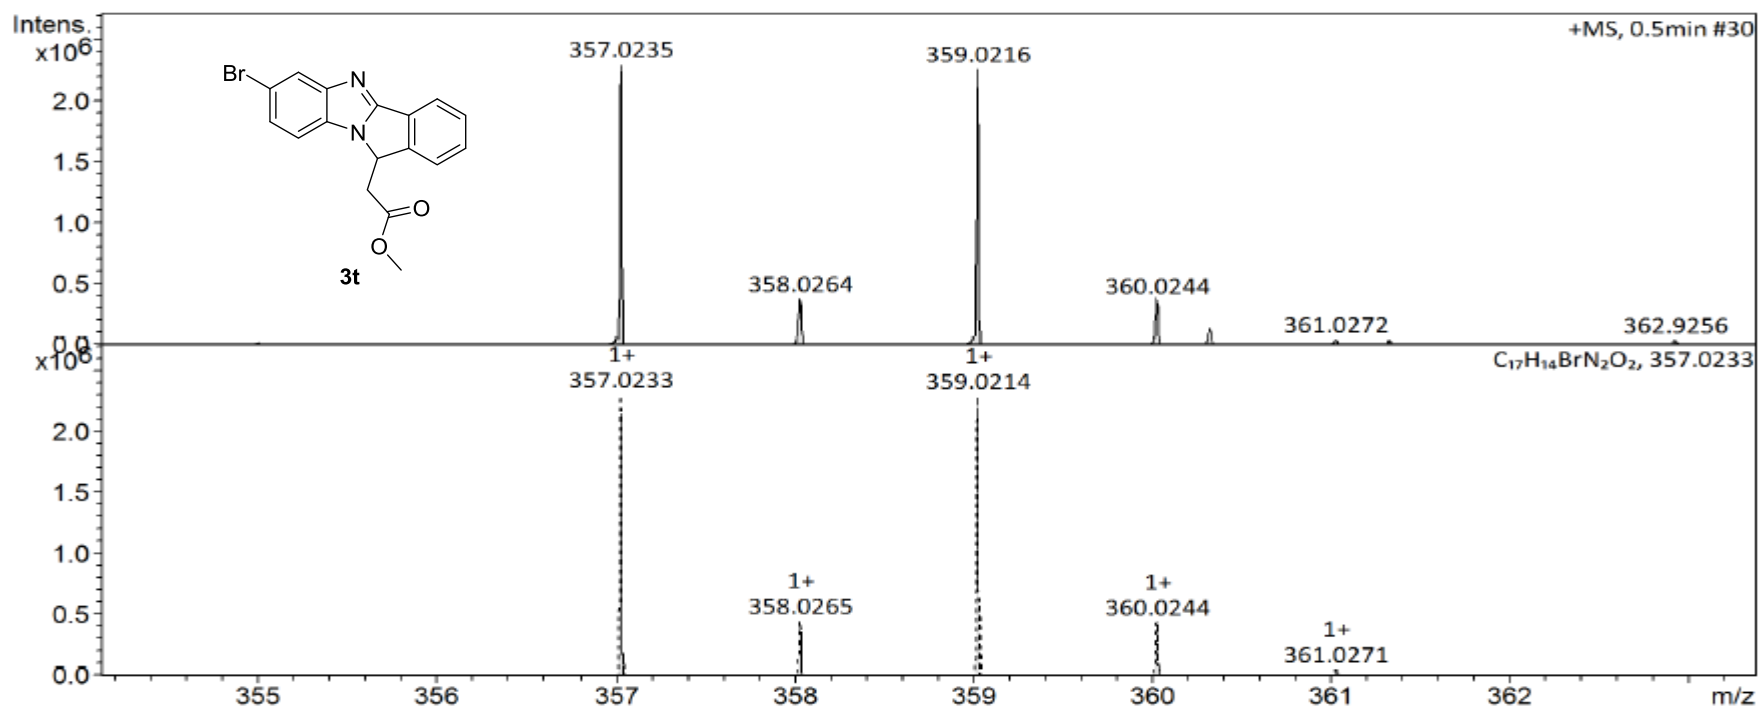

| Meas. m/z | # | Ion Formula                                                     | m/z      | err [ppm] | mSigma | # Sigma | Score  | rdb  | e <sup>-</sup> Conf | N-Rule | Adduct |
|-----------|---|-----------------------------------------------------------------|----------|-----------|--------|---------|--------|------|---------------------|--------|--------|
| 357.0235  | 1 | C <sub>17</sub> H <sub>14</sub> BrN <sub>2</sub> O <sub>2</sub> | 357.0233 | -0.4      | 21.4   | 1       | 100.00 | 11.5 | even                | ok     | M+H    |

High resolution mass (ESI)<sup>+</sup> spectrum of compound of **3t**



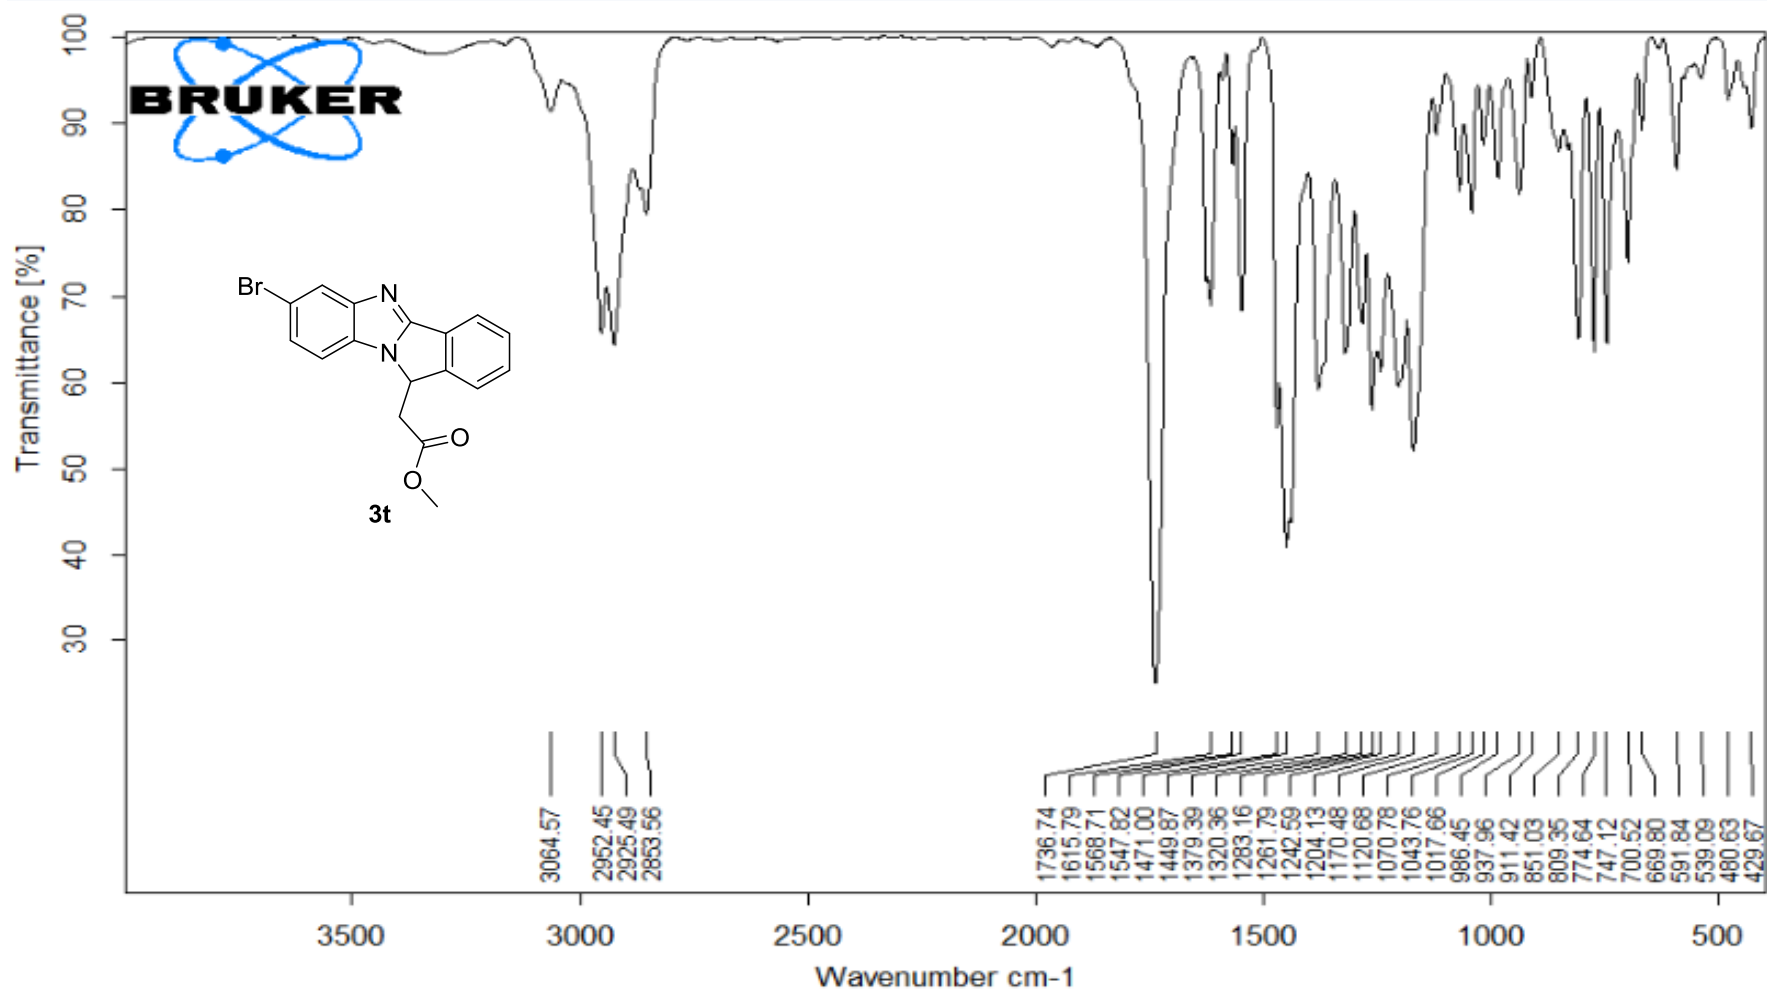

IR spectrum of compound of 3t

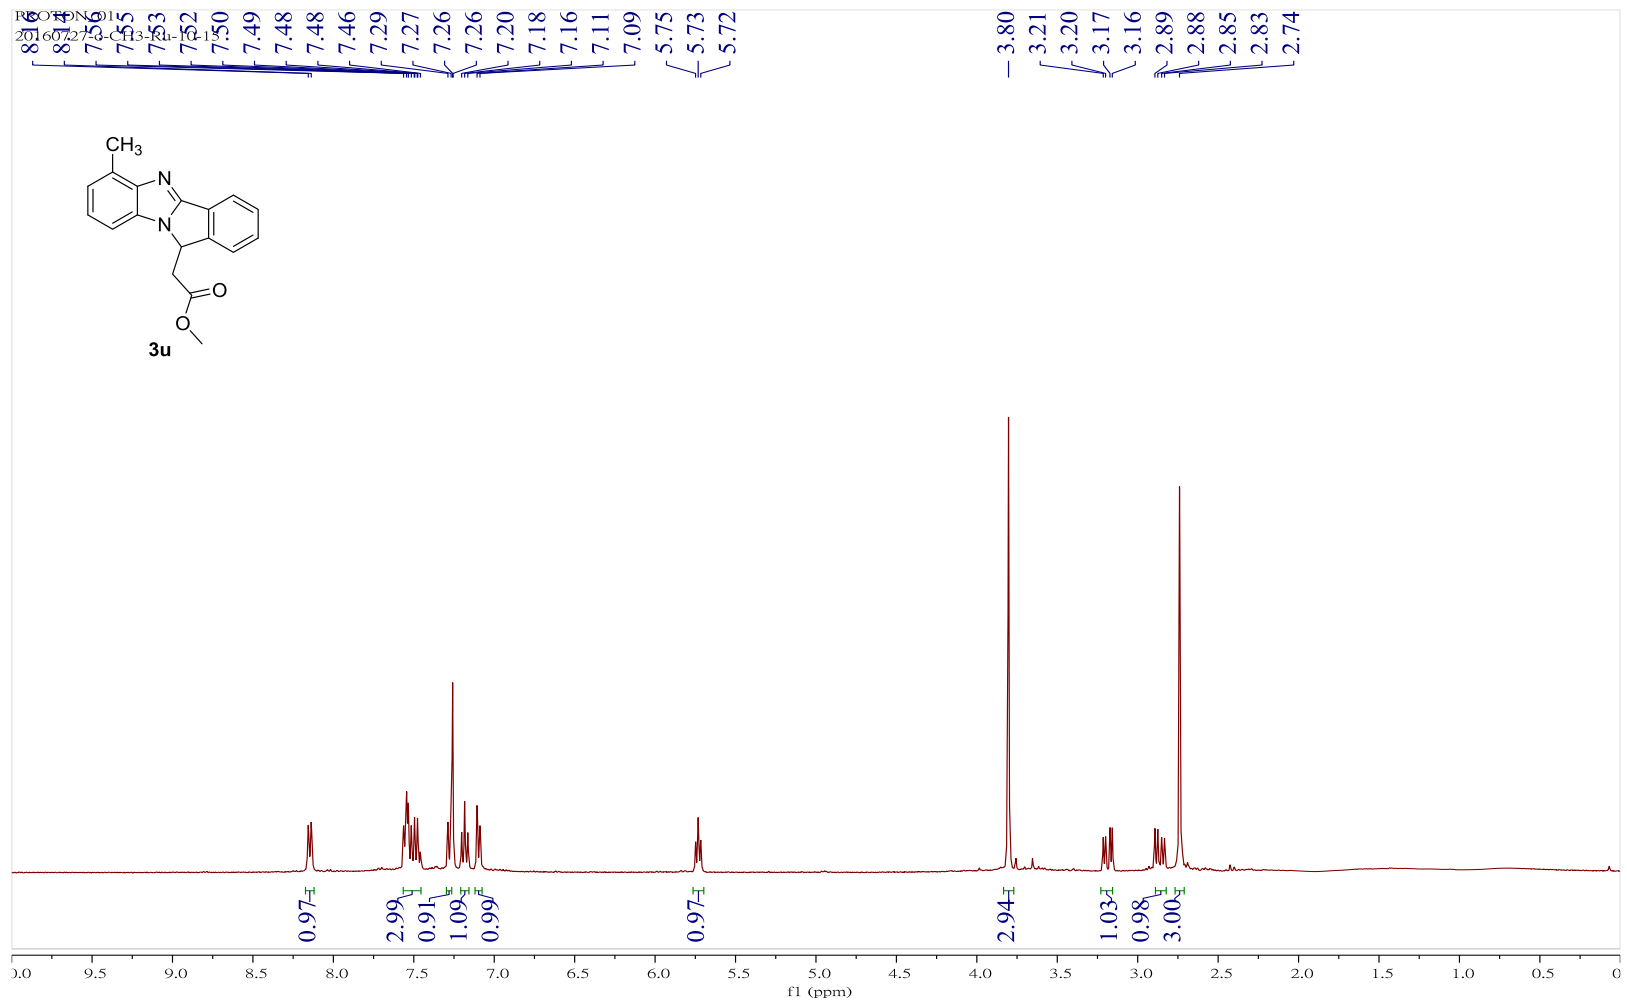

$^1\text{H}$  NMR Spectrum (400 MHz) of compound **3u** in  $\text{CDCl}_3$

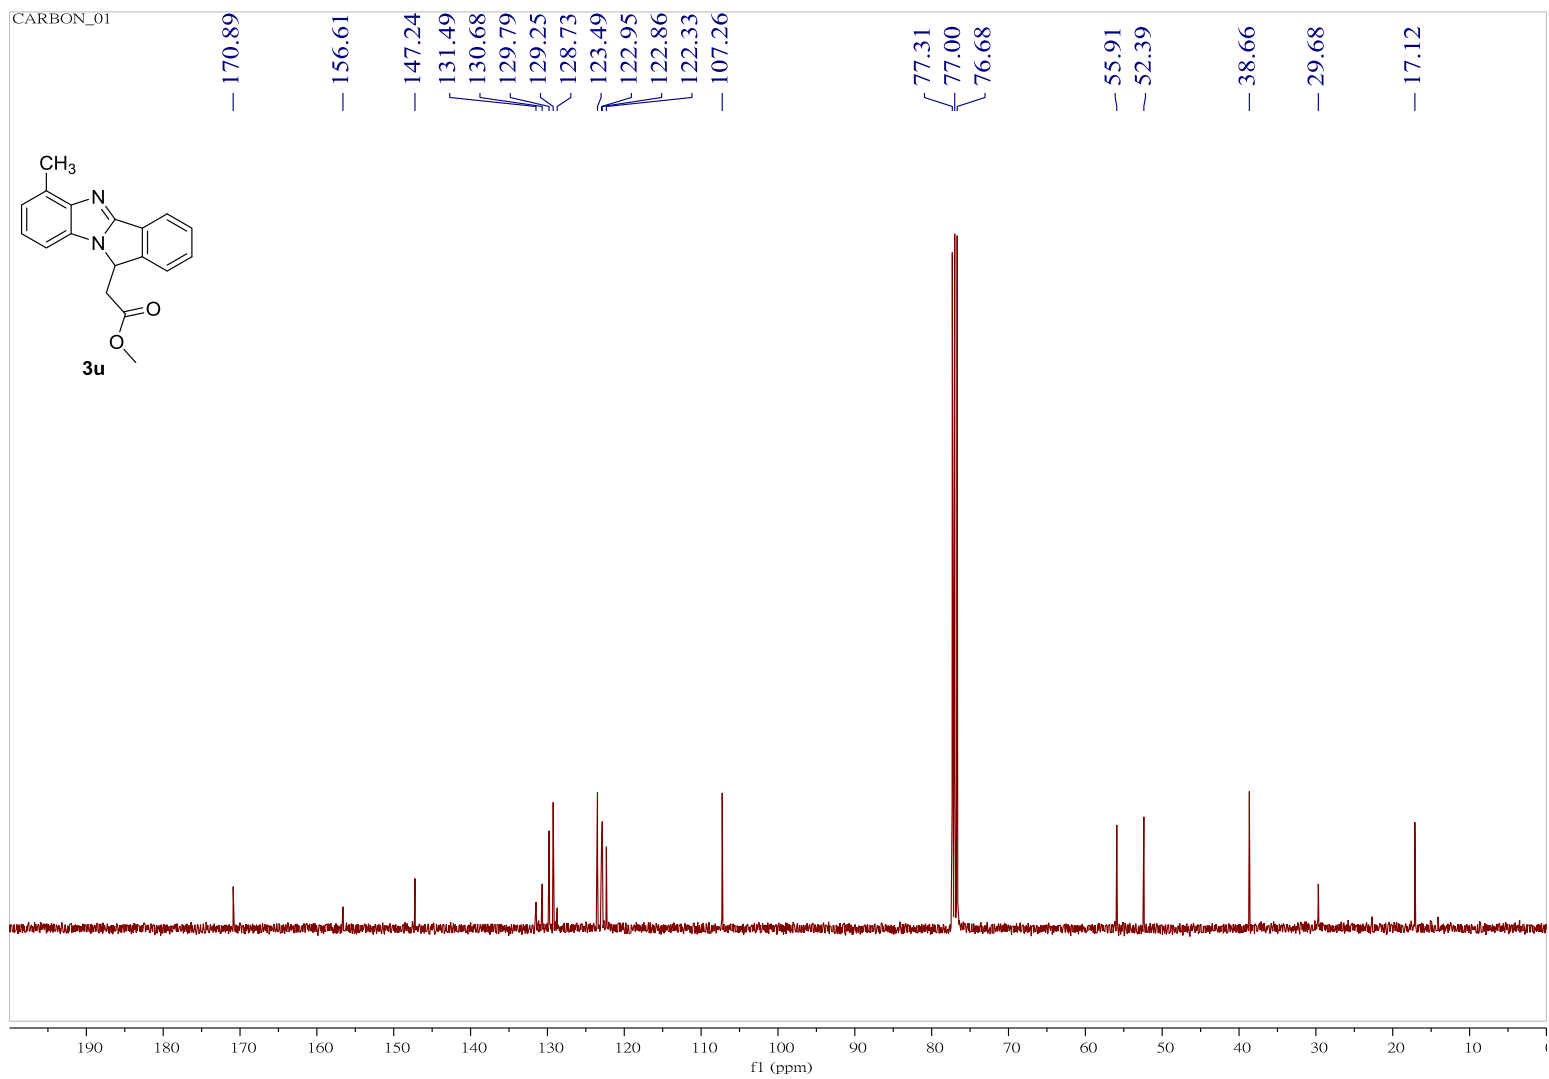

<sup>13</sup>C NMR Spectrum (100 MHz) of compound **3u** in CDCl<sub>3</sub>

O-CH3-Ru-10-15

20160729001 103 (3.622) Cn (Cen,3, 80.00, Ht); Sm (Mn, 2x0.75); Sb (3,50.00 ); Cm (101:107-51:67)

Scan ES+  
3.35e7

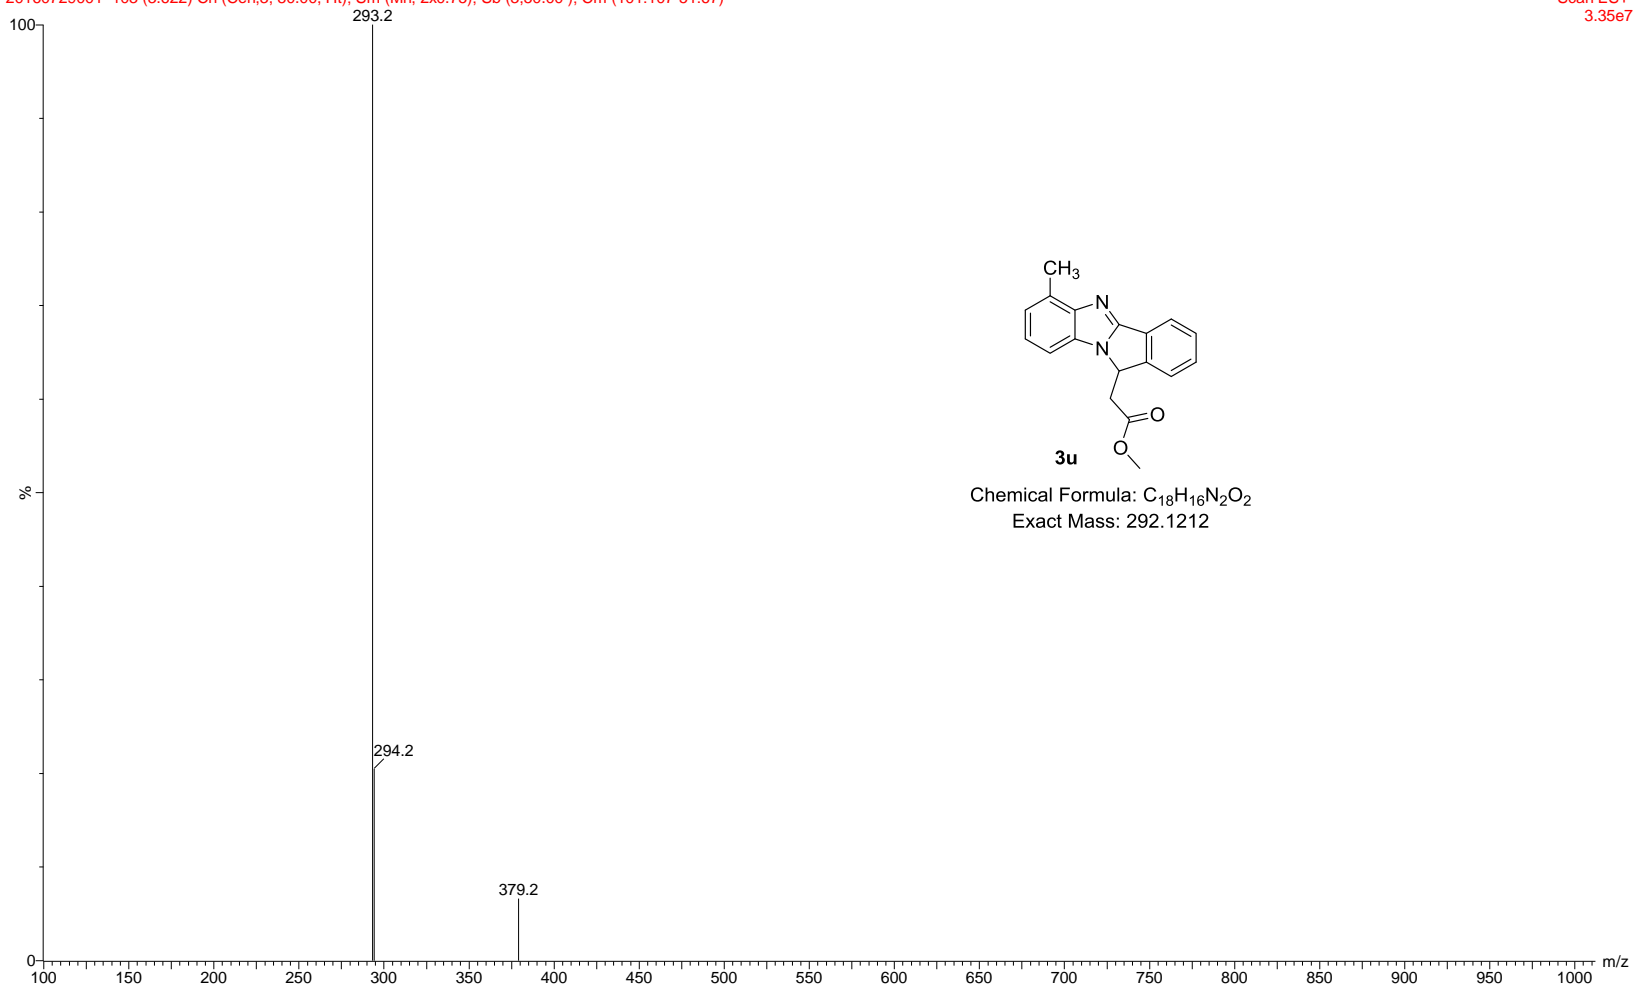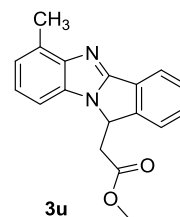

Chemical Formula: C<sub>18</sub>H<sub>16</sub>N<sub>2</sub>O<sub>2</sub>  
Exact Mass: 292.1212

ESI<sup>+</sup> Mass spectrum of compound **3u**

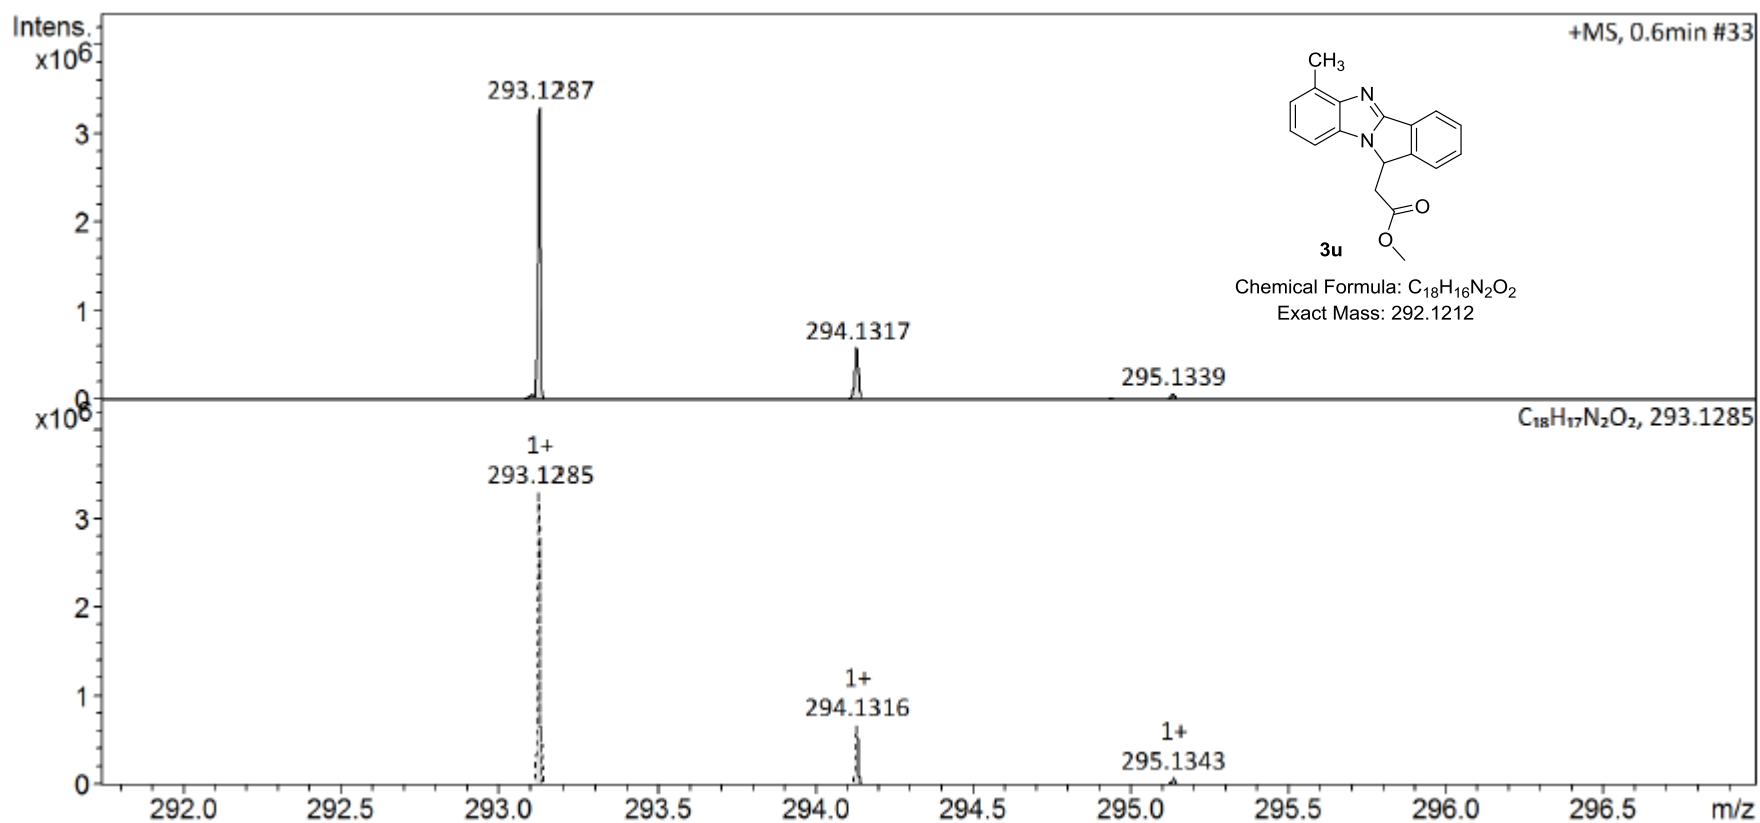

| Meas. m/z | # | Ion Formula                                                   | m/z      | err [ppm] | mSigma | # Sigma | Score  | rdb  | e <sup>-</sup> Conf | N-Rule | Adduct |
|-----------|---|---------------------------------------------------------------|----------|-----------|--------|---------|--------|------|---------------------|--------|--------|
| 293.1287  | 1 | C <sub>18</sub> H <sub>17</sub> N <sub>2</sub> O <sub>2</sub> | 293.1285 | 0.7       | 17.1   | 1       | 100.00 | 11.5 | even                | ok     | M+H    |

High resolution mass (ESI)<sup>+</sup> spectrum of compound of **3u**

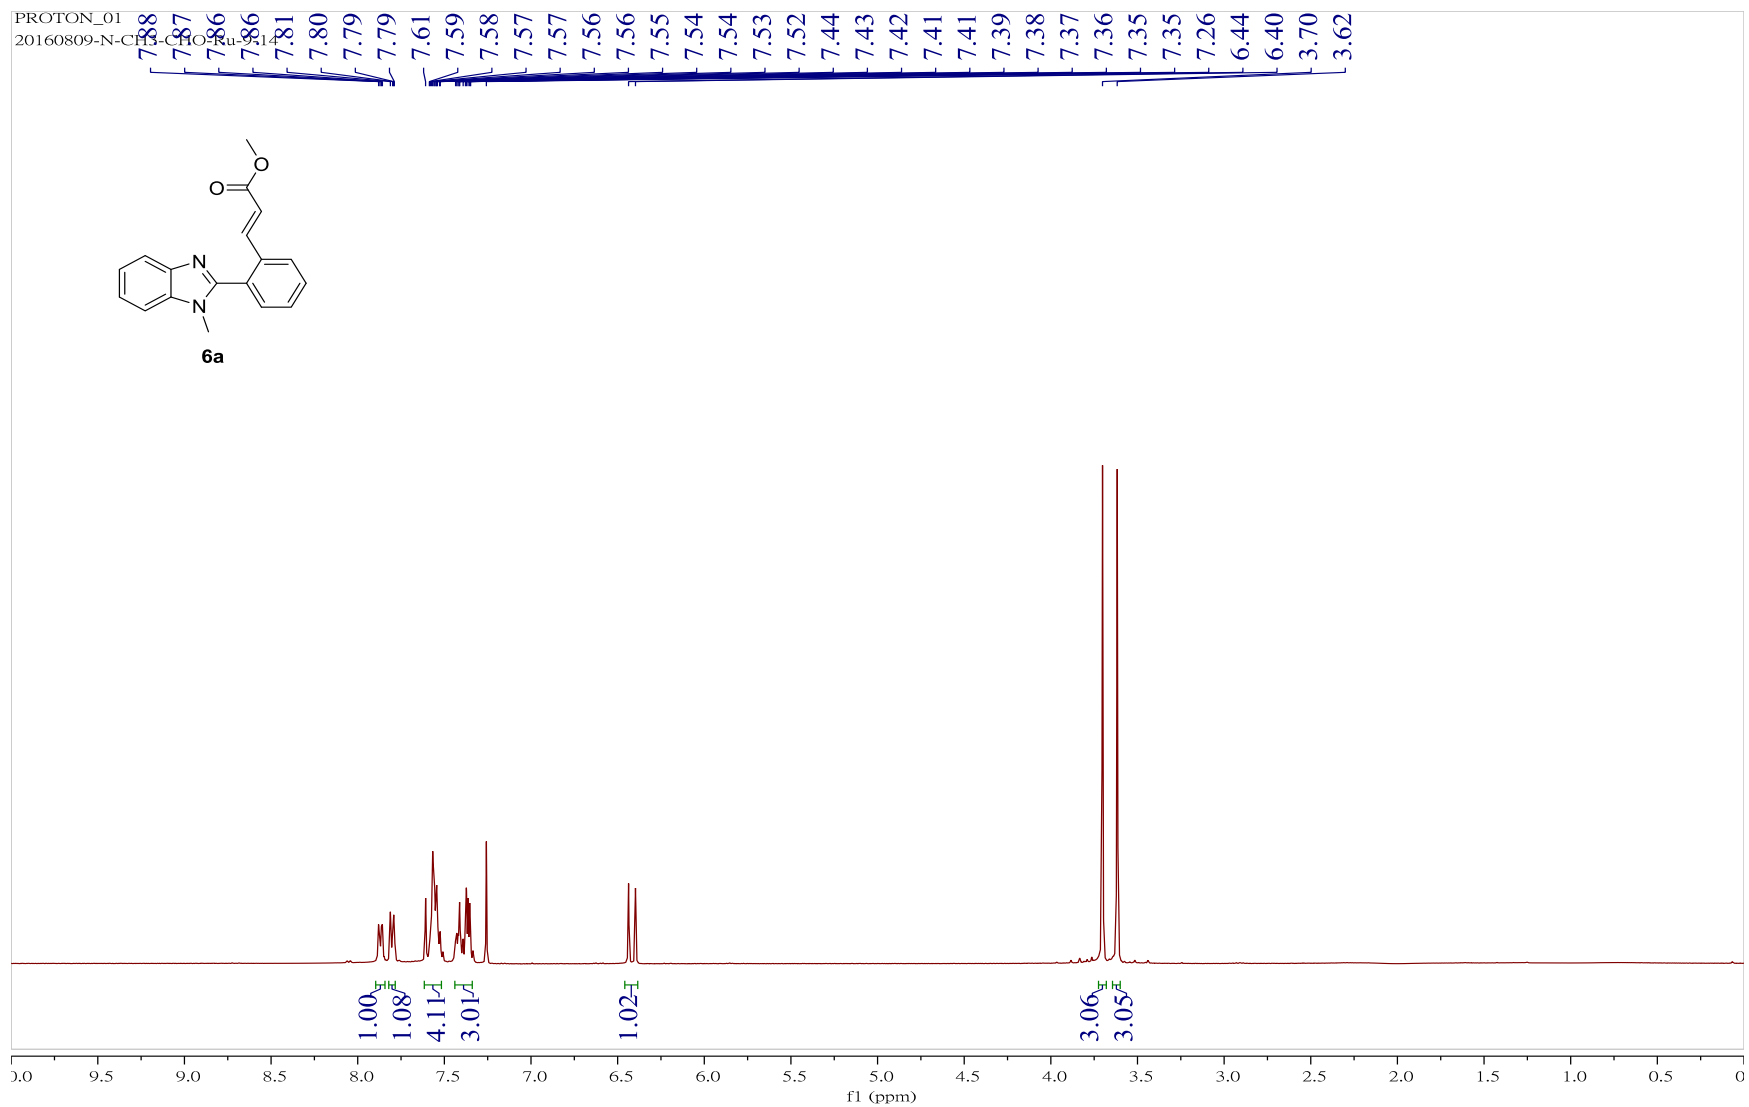

<sup>1</sup>H NMR Spectrum (400 MHz) of compound **6a** in CDCl<sub>3</sub>

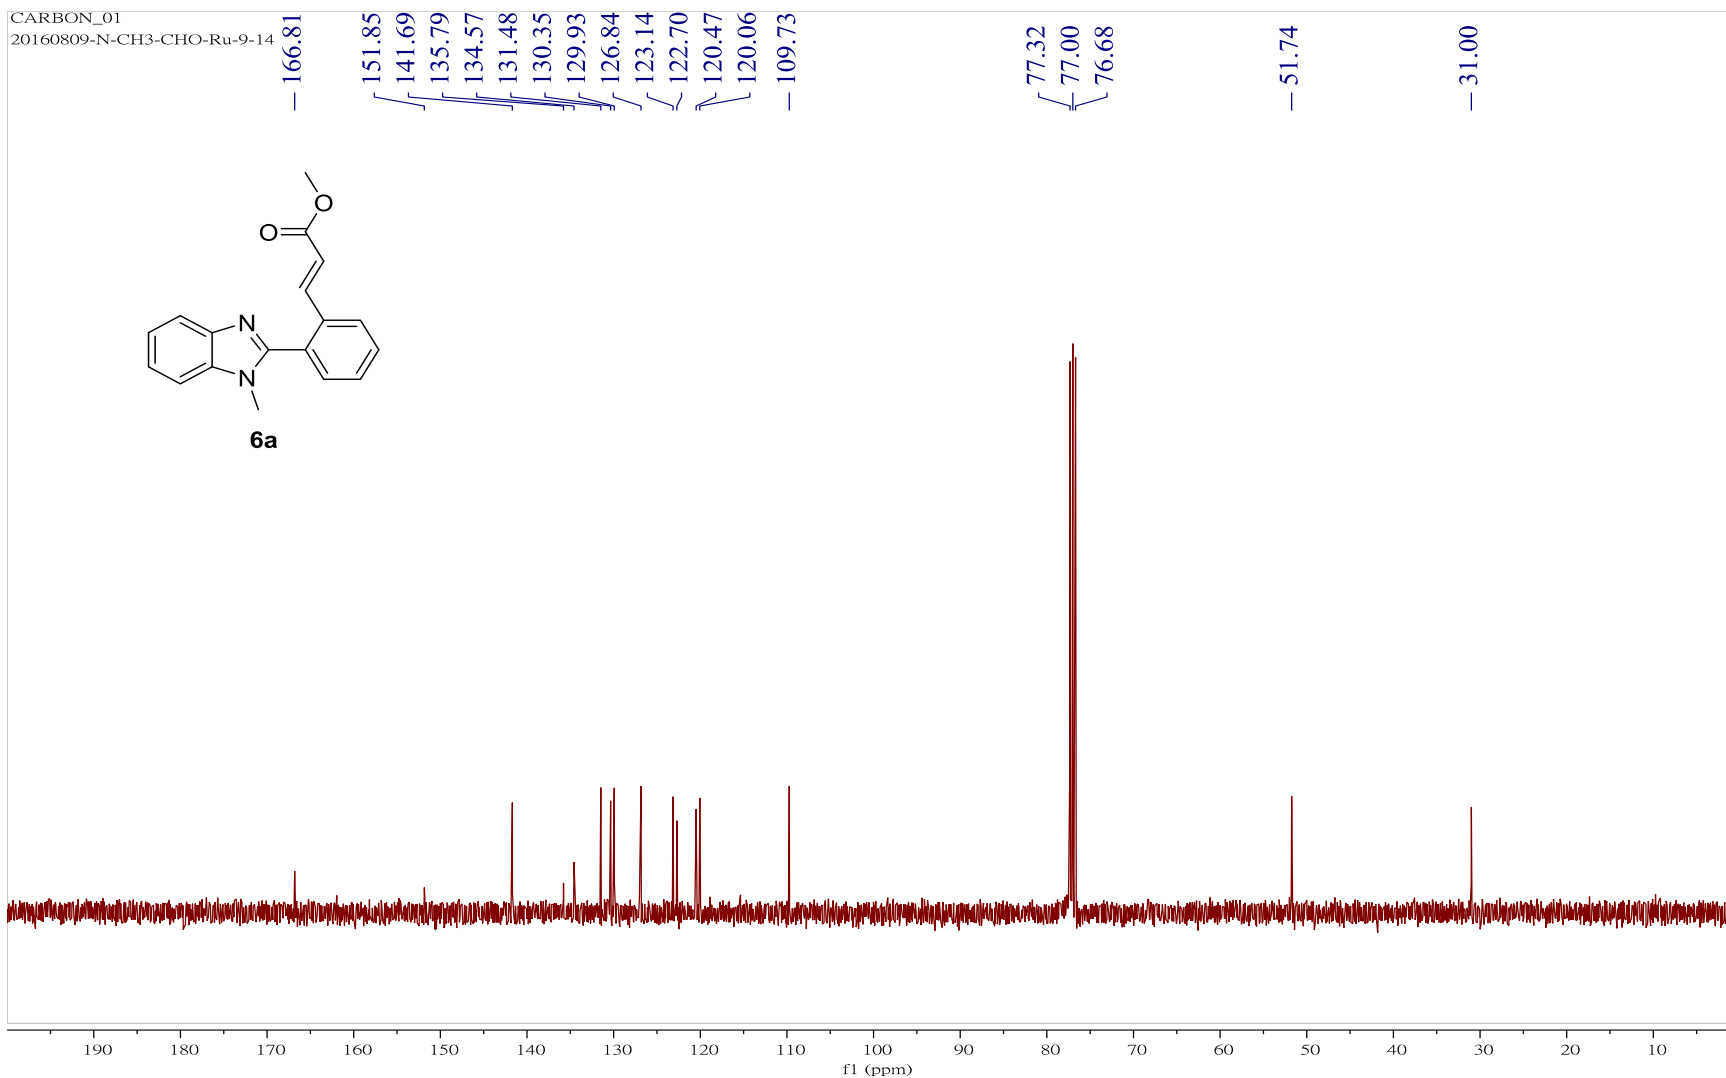

$^{13}\text{C}$  NMR Spectrum (100 MHz) of compound **6a** in  $\text{CDCl}_3$

**N-CH3-Ru-3**

201608090015 15 (1.027) Cn (Cen,3, 80.00, Ht); Sm (Mn, 2x0.75); Sb (3,50.00 ); Cm (14:17-9:12)

Scan ES+  
1.56e7

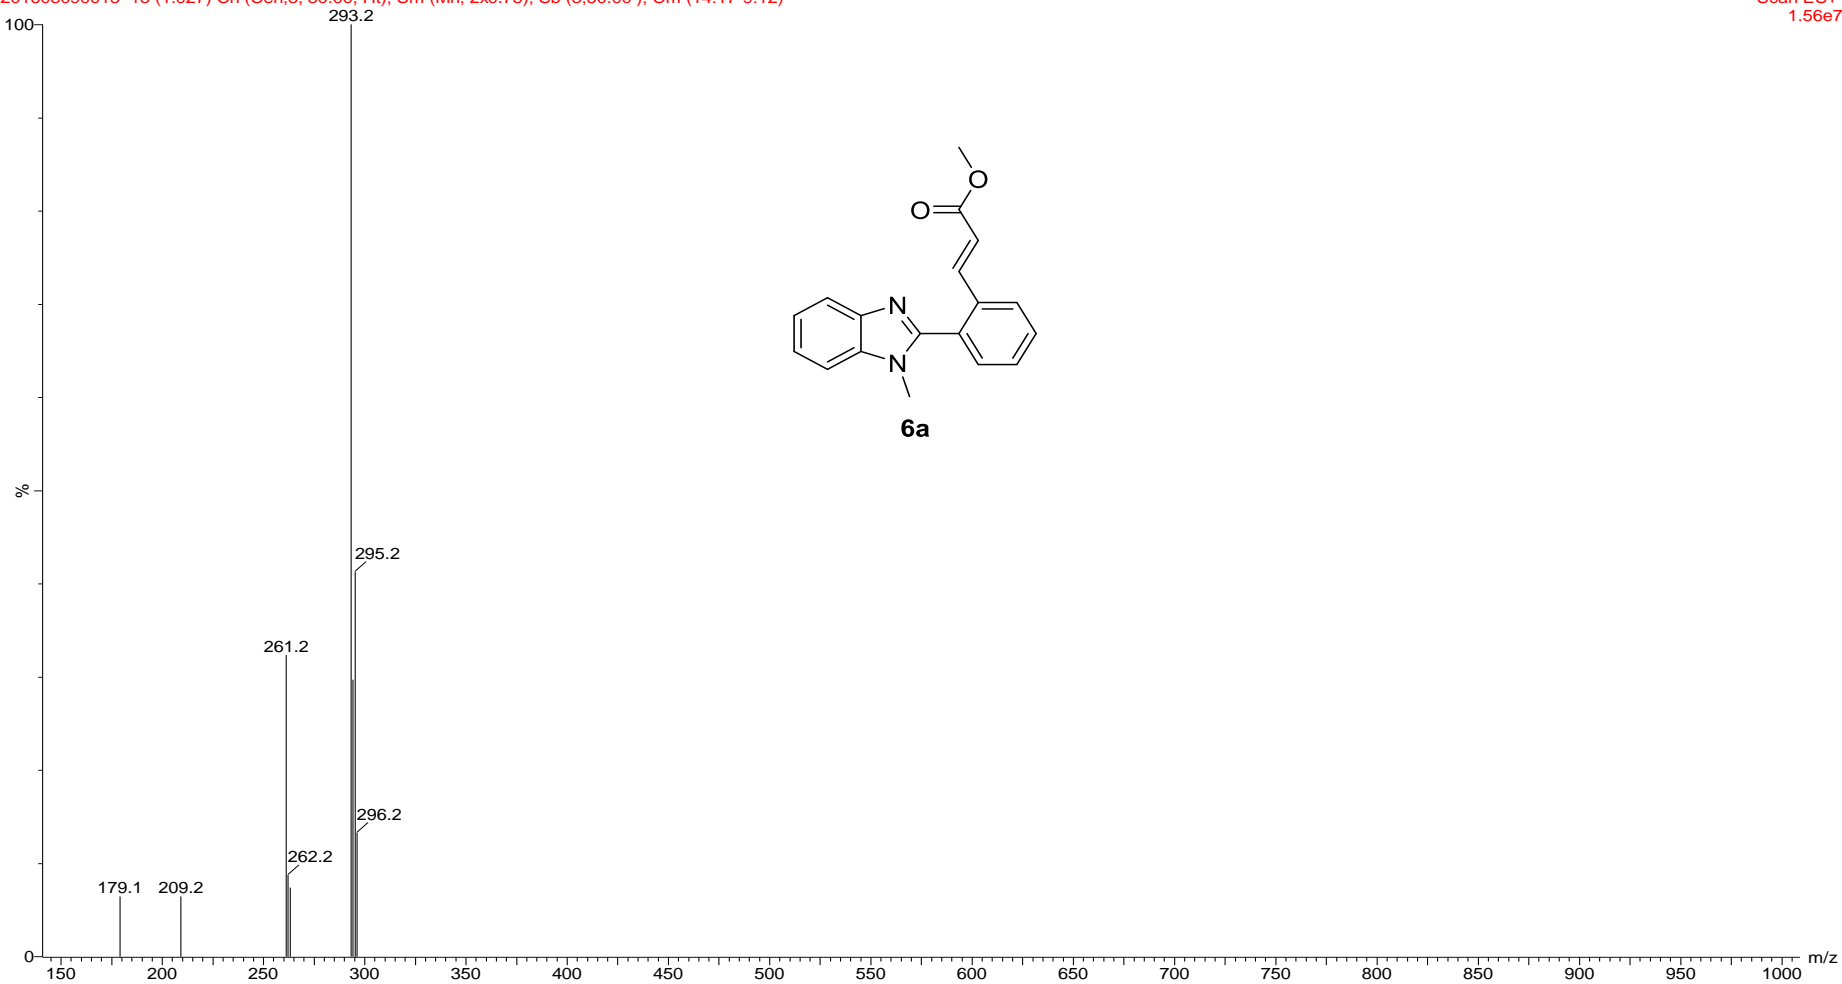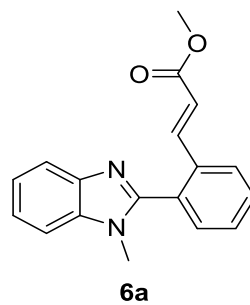

ESI mass spectrum of compound **6a**



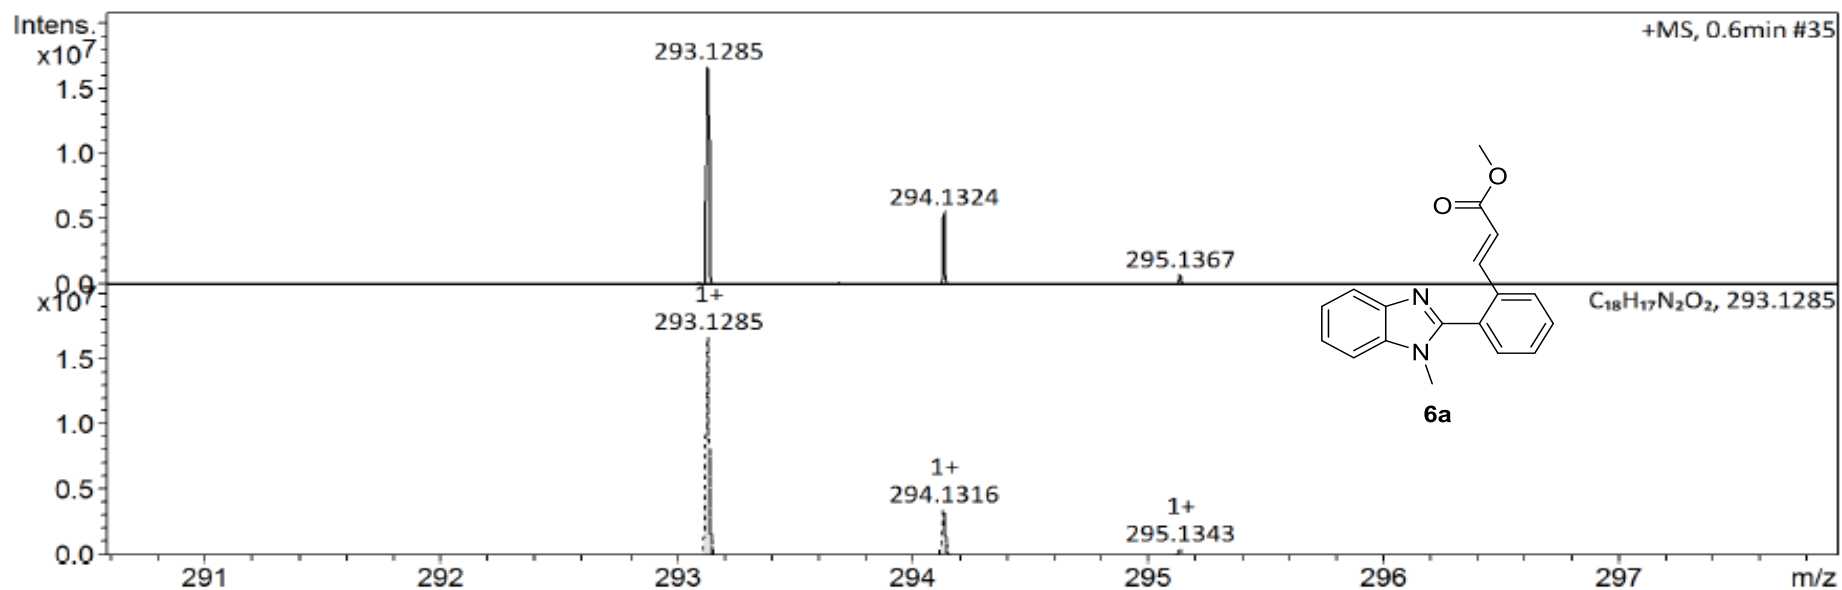

| Meas. m/z | # | Ion Formula                                                   | m/z      | err [ppm] | mSigma | # Sigma | Score  | rdb  | e <sup>-</sup> Conf | N-Rule | Adduct |
|-----------|---|---------------------------------------------------------------|----------|-----------|--------|---------|--------|------|---------------------|--------|--------|
| 293.1285  | 1 | C <sub>18</sub> H <sub>17</sub> N <sub>2</sub> O <sub>2</sub> | 293.1285 | -0.1      | 72.0   | 1       | 100.00 | 11.5 | even                | ok     | M+H    |

HRMS Spectrum of compound **6a**

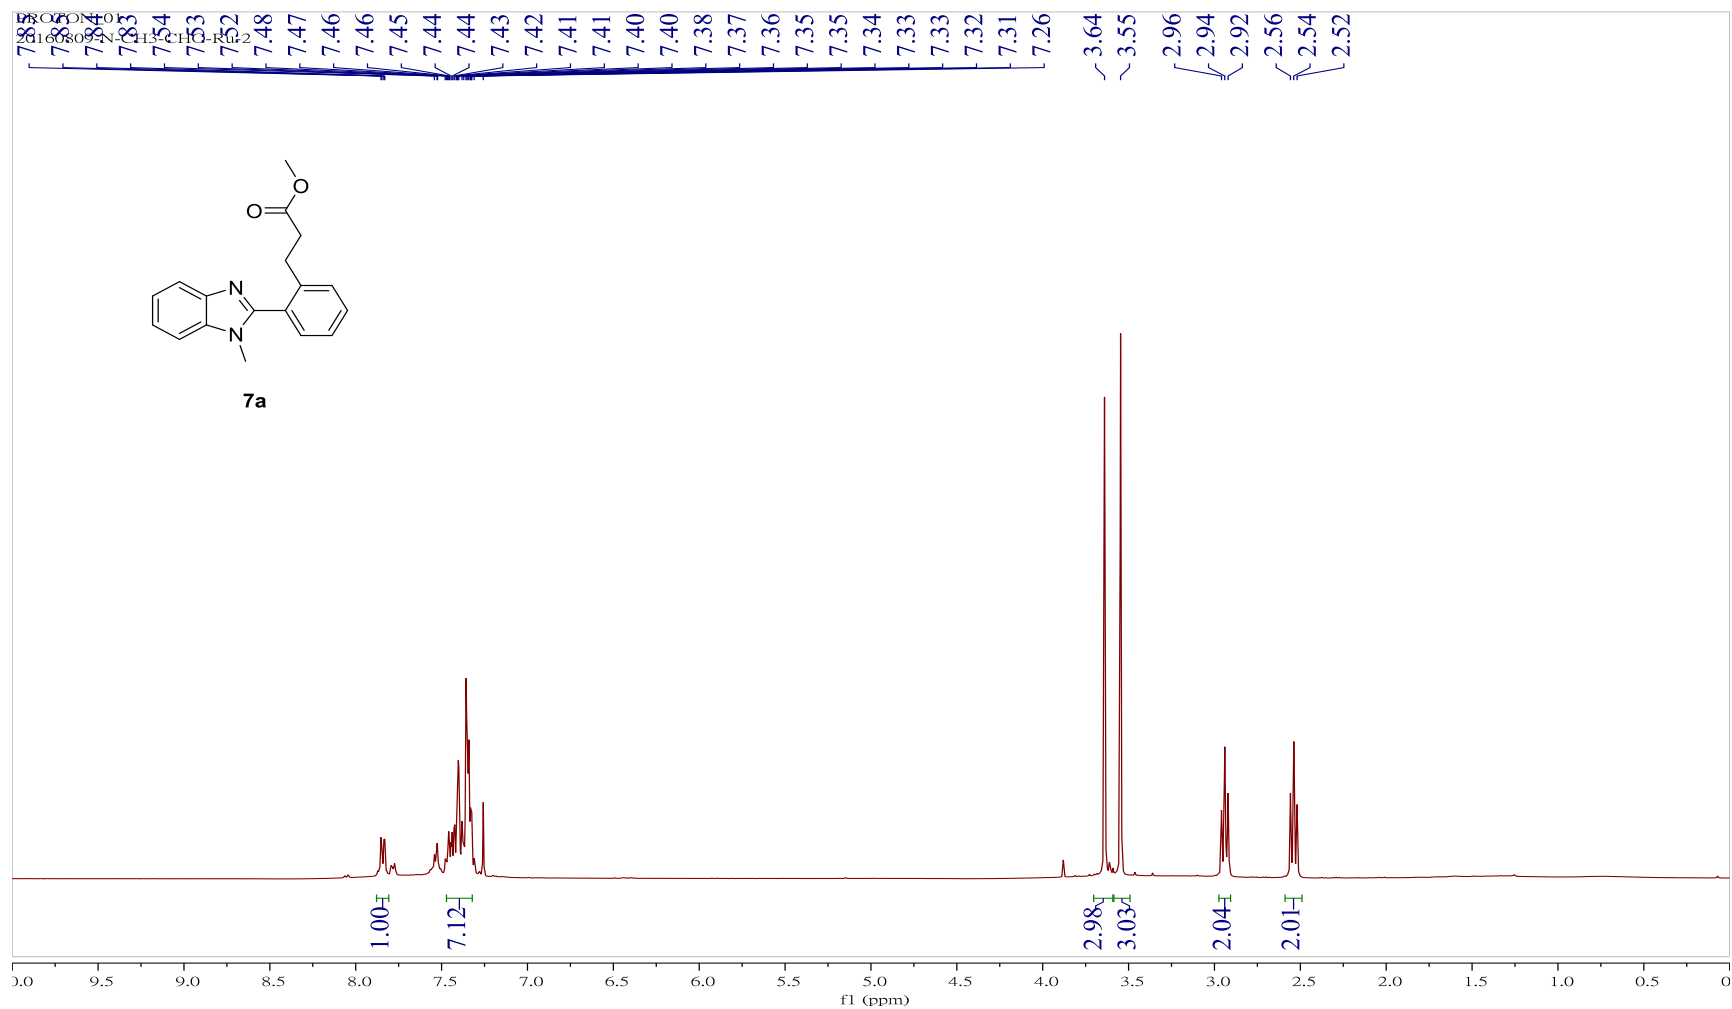

<sup>1</sup>H NMR Spectrum (400 MHz) of compound **7a** in CDCl<sub>3</sub>

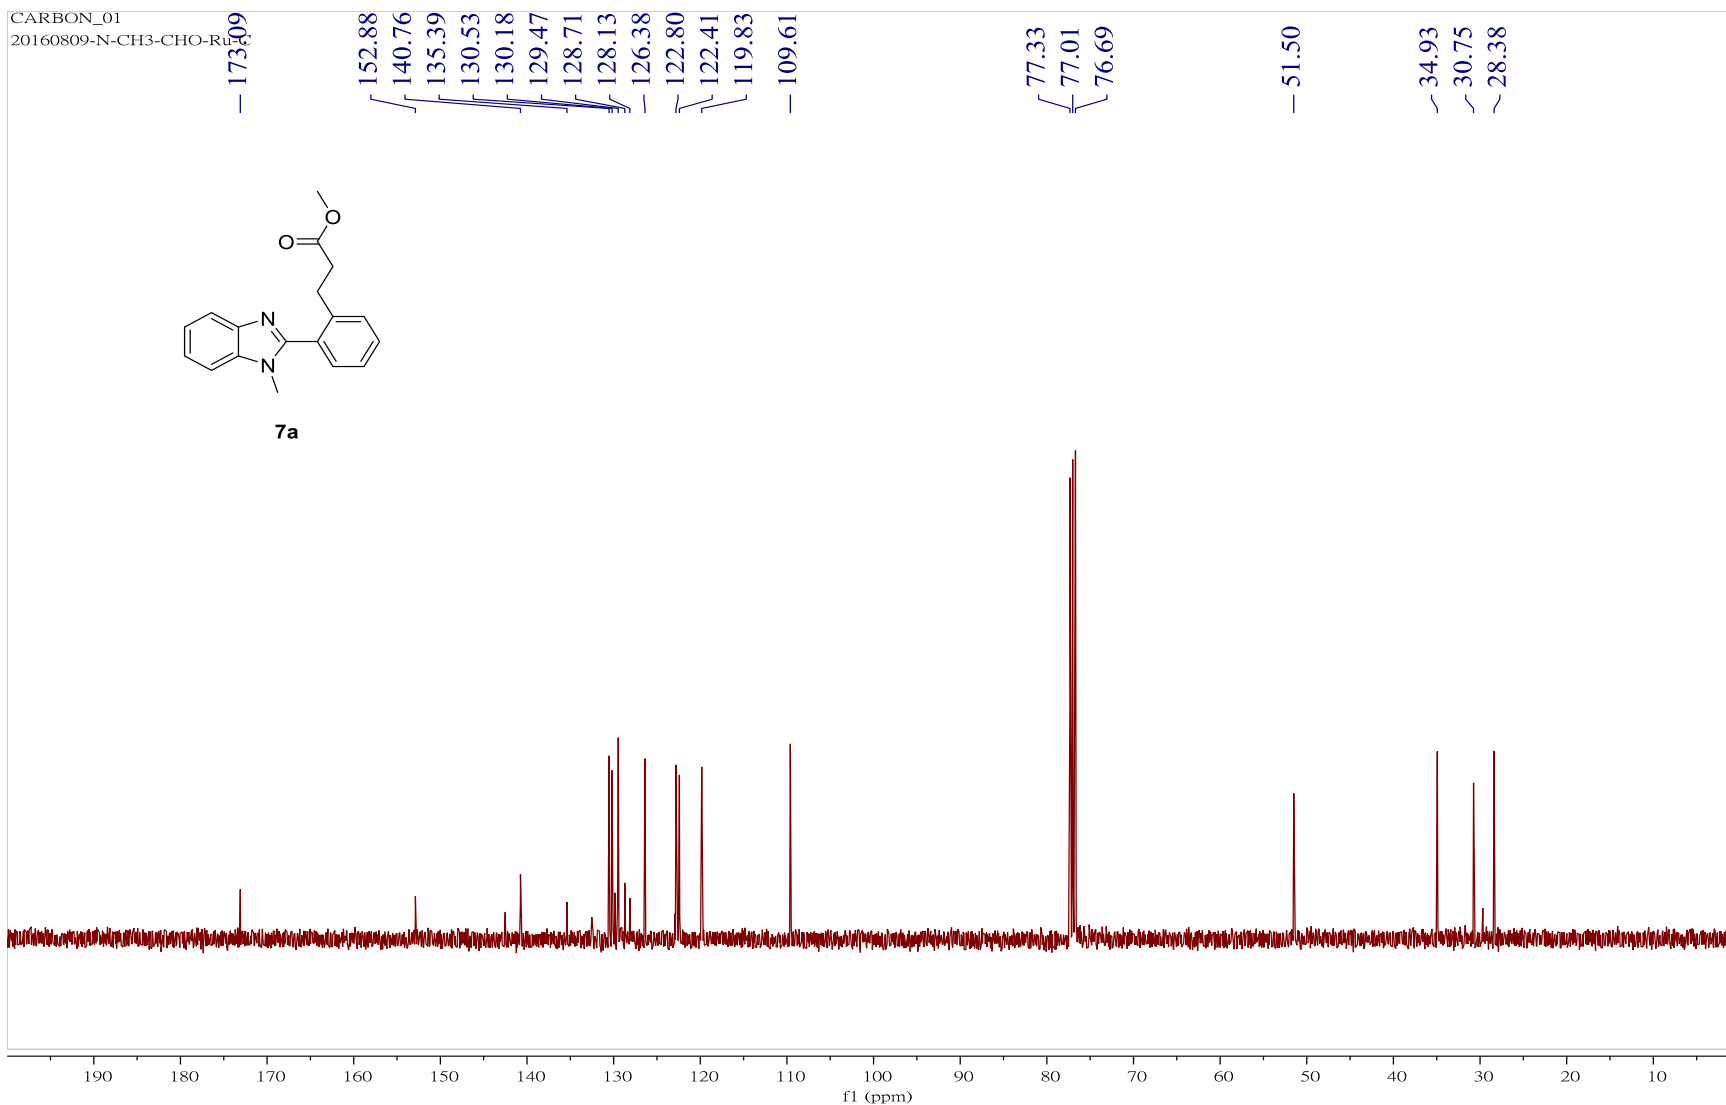

$^{13}\text{C}$  NMR Spectrum (100 MHz) of compound **7a** in  $\text{CDCl}_3$

**N-CH3-Ru-2**

201608090023 16 (1.096) Cn (Cen,3, 80.00, Ht); Sm (Mn, 2x0.75); Sb (3,50.00 ); Cm (16:19-9:12)

Scan ES+  
7.93e7

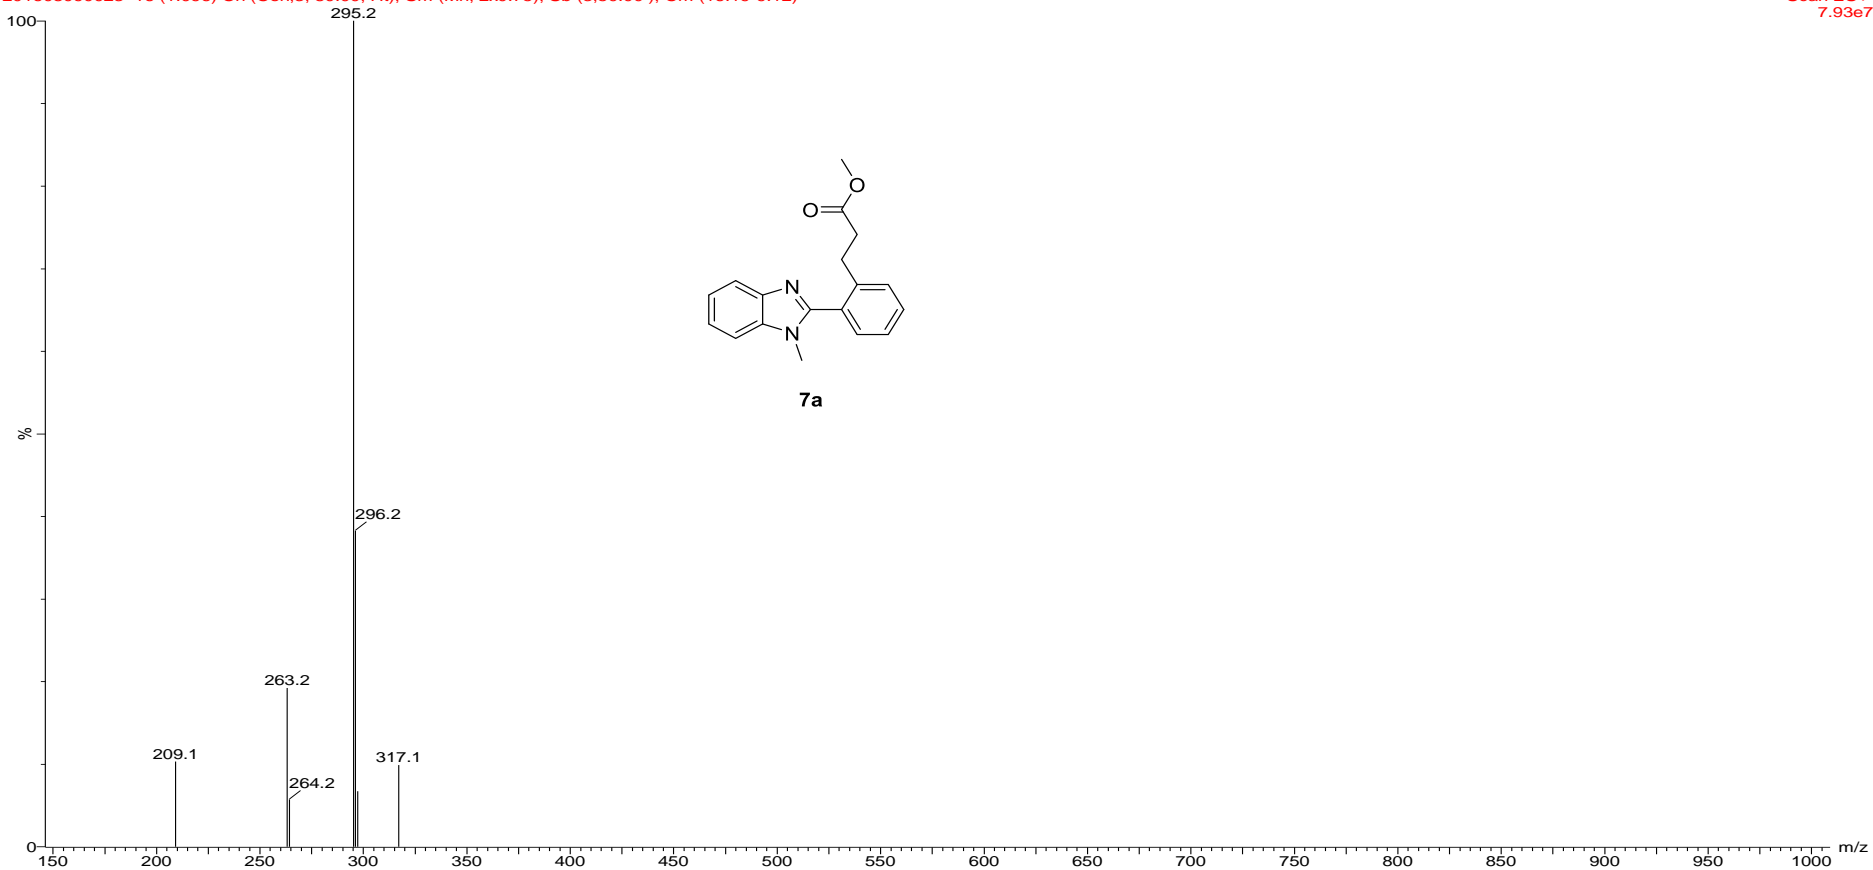

ESI<sup>+</sup> Mass spectrum of compound 7a

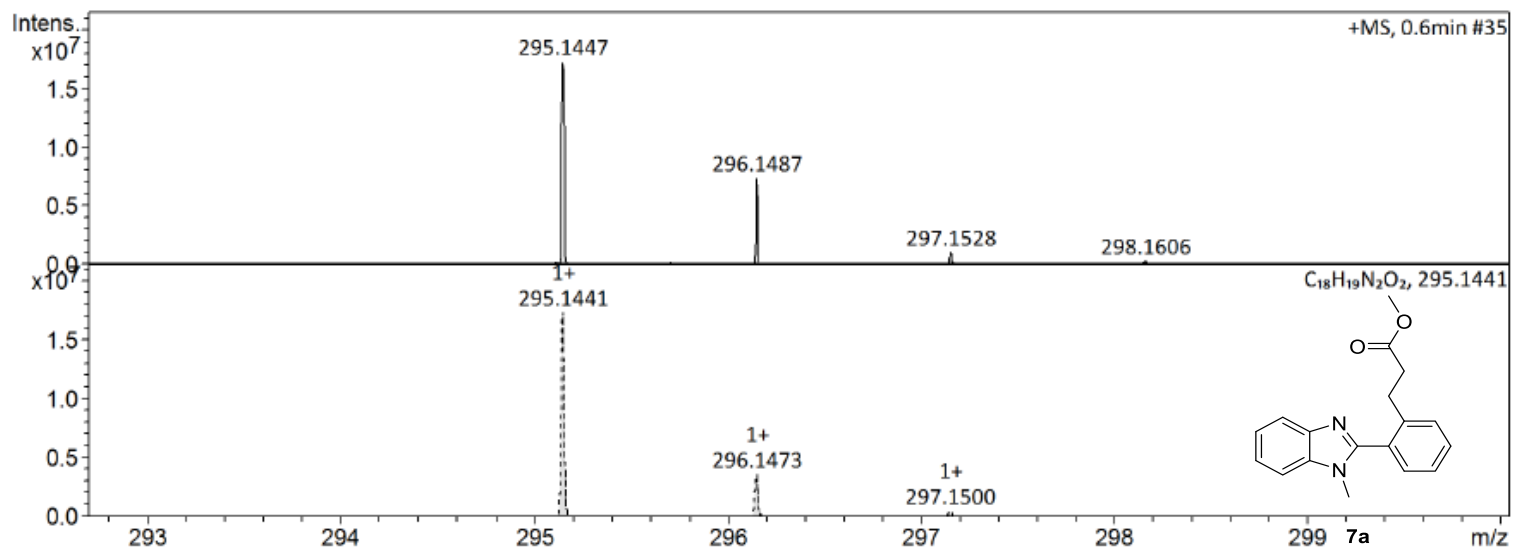

HRMS Spectrum of compound **7a**

## X-ray crystallography data of compound **3b**

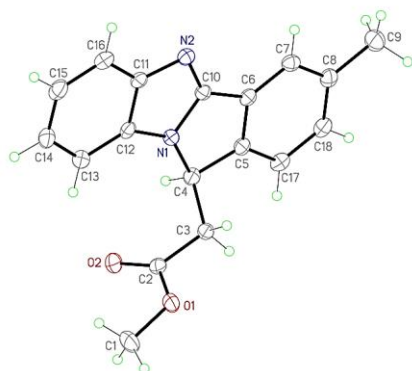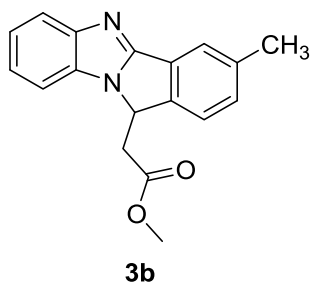

Table 1. Crystal data and structure refinement for mo\_160318lt\_0m.

|                                   |                                                               |                  |
|-----------------------------------|---------------------------------------------------------------|------------------|
| Identification code               | mo_160318LT_0m                                                |                  |
| Empirical formula                 | C <sub>18</sub> H <sub>16</sub> N <sub>2</sub> O <sub>2</sub> |                  |
| Formula weight                    | 292.33                                                        |                  |
| Temperature                       | 100(2) K                                                      |                  |
| Wavelength                        | 0.71073 Å                                                     |                  |
| Crystal system                    | Monoclinic                                                    |                  |
| Space group                       | P 21/c                                                        |                  |
| Unit cell dimensions              | a = 12.4244(9) Å                                              | α = 90°.         |
|                                   | b = 8.0614(6) Å                                               | β = 100.607(2)°. |
|                                   | c = 14.7164(10) Å                                             | γ = 90°.         |
| Volume                            | 1448.78(18) Å <sup>3</sup>                                    |                  |
| Z                                 | 4                                                             |                  |
| Density (calculated)              | 1.340 Mg/m <sup>3</sup>                                       |                  |
| Absorption coefficient            | 0.089 mm <sup>-1</sup>                                        |                  |
| F(000)                            | 616                                                           |                  |
| Crystal size                      | 0.25 x 0.20 x 0.20 mm <sup>3</sup>                            |                  |
| Theta range for data collection   | 2.816 to 26.379°.                                             |                  |
| Index ranges                      | -15 ≤ h ≤ 15, -10 ≤ k ≤ 5, -18 ≤ l ≤ 18                       |                  |
| Reflections collected             | 11617                                                         |                  |
| Independent reflections           | 2954 [R(int) = 0.0265]                                        |                  |
| Completeness to theta = 25.242°   | 99.8 %                                                        |                  |
| Absorption correction             | Semi-empirical from equivalents                               |                  |
| Max. and min. transmission        | 0.9485 and 0.9082                                             |                  |
| Refinement method                 | Full-matrix least-squares on F <sup>2</sup>                   |                  |
| Data / restraints / parameters    | 2954 / 0 / 201                                                |                  |
| Goodness-of-fit on F <sup>2</sup> | 1.030                                                         |                  |

|                               |                                    |
|-------------------------------|------------------------------------|
| Final R indices [I>2sigma(I)] | R1 = 0.0376, wR2 = 0.0917          |
| R indices (all data)          | R1 = 0.0463, wR2 = 0.0982          |
| Extinction coefficient        | n/a                                |
| Largest diff. peak and hole   | 0.241 and -0.197 e.Å <sup>-3</sup> |

Table 2. Atomic coordinates (x 10<sup>4</sup>) and equivalent isotropic displacement parameters (Å<sup>2</sup>x 10<sup>3</sup>) for mo\_160318lt\_0m. U(eq) is defined as one third of the trace of the orthogonalized U<sup>ij</sup> tensor.

|       | x       | y       | z       | U(eq) |
|-------|---------|---------|---------|-------|
| O(1)  | 1865(1) | 318(1)  | 2540(1) | 28(1) |
| O(2)  | 1451(1) | 2566(1) | 3309(1) | 28(1) |
| N(1)  | 3651(1) | 1886(1) | 5090(1) | 18(1) |
| N(2)  | 4607(1) | 825(1)  | 6419(1) | 19(1) |
| C(1)  | 715(1)  | 101(2)  | 2169(1) | 40(1) |
| C(2)  | 2122(1) | 1645(2) | 3089(1) | 20(1) |
| C(3)  | 3343(1) | 1808(2) | 3356(1) | 18(1) |
| C(4)  | 3731(1) | 2802(2) | 4238(1) | 19(1) |
| C(5)  | 4961(1) | 3120(2) | 4401(1) | 18(1) |
| C(6)  | 5484(1) | 2433(2) | 5235(1) | 18(1) |
| C(7)  | 6605(1) | 2559(2) | 5531(1) | 20(1) |
| C(8)  | 7225(1) | 3407(2) | 4981(1) | 22(1) |
| C(9)  | 8442(1) | 3621(2) | 5300(1) | 30(1) |
| C(10) | 4644(1) | 1653(2) | 5658(1) | 16(1) |
| C(11) | 3494(1) | 486(2)  | 6350(1) | 18(1) |
| C(12) | 2874(1) | 1179(2) | 5534(1) | 18(1) |
| C(13) | 1735(1) | 1083(2) | 5341(1) | 24(1) |
| C(14) | 1242(1) | 232(2)  | 5972(1) | 27(1) |
| C(15) | 1850(1) | -509(2) | 6765(1) | 26(1) |
| C(16) | 2976(1) | -392(2) | 6963(1) | 22(1) |
| C(17) | 5571(1) | 3946(2) | 3842(1) | 21(1) |
| C(18) | 6696(1) | 4083(2) | 4143(1) | 23(1) |

Table 3. Bond lengths [ $\text{\AA}$ ] and angles [ $^\circ$ ] for mo\_160318lt\_0m.

---

|             |            |
|-------------|------------|
| O(1)-C(2)   | 1.3432(16) |
| O(1)-C(1)   | 1.4432(16) |
| O(2)-C(2)   | 1.2044(16) |
| N(1)-C(10)  | 1.3702(16) |
| N(1)-C(12)  | 1.3848(16) |
| N(1)-C(4)   | 1.4735(16) |
| N(2)-C(10)  | 1.3118(16) |
| N(2)-C(11)  | 1.3952(16) |
| C(1)-H(16)  | 0.9800     |
| C(1)-H(3)   | 0.9800     |
| C(1)-H(1)   | 0.9800     |
| C(2)-C(3)   | 1.5009(17) |
| C(3)-C(4)   | 1.5254(17) |
| C(3)-H(14)  | 0.9900     |
| C(3)-H(15)  | 0.9900     |
| C(4)-C(5)   | 1.5252(17) |
| C(4)-H(13)  | 1.0000     |
| C(5)-C(17)  | 1.3868(18) |
| C(5)-C(6)   | 1.3936(18) |
| C(6)-C(7)   | 1.3847(18) |
| C(6)-C(10)  | 1.4525(17) |
| C(7)-C(8)   | 1.3953(19) |
| C(7)-H(8)   | 0.9500     |
| C(8)-C(18)  | 1.3967(19) |
| C(8)-C(9)   | 1.5080(18) |
| C(9)-H(9)   | 0.9800     |
| C(9)-H(2)   | 0.9800     |
| C(9)-H(10)  | 0.9800     |
| C(11)-C(16) | 1.3937(18) |
| C(11)-C(12) | 1.4165(18) |
| C(12)-C(13) | 1.3936(18) |
| C(13)-C(14) | 1.384(2)   |



|                  |            |
|------------------|------------|
| C(13)-H(7)       | 0.9500     |
| C(14)-C(15)      | 1.402(2)   |
| C(14)-H(6)       | 0.9500     |
| C(15)-C(16)      | 1.3782(19) |
| C(15)-H(5)       | 0.9500     |
| C(16)-H(4)       | 0.9500     |
| C(17)-C(18)      | 1.3905(19) |
| C(17)-H(12)      | 0.9500     |
| C(18)-H(11)      | 0.9500     |
| <br>             |            |
| C(2)-O(1)-C(1)   | 115.67(11) |
| C(10)-N(1)-C(12) | 106.42(10) |
| C(10)-N(1)-C(4)  | 113.19(10) |
| C(12)-N(1)-C(4)  | 140.37(11) |
| C(10)-N(2)-C(11) | 103.13(10) |
| O(1)-C(1)-H(16)  | 109.5      |
| O(1)-C(1)-H(3)   | 109.5      |
| H(16)-C(1)-H(3)  | 109.5      |
| O(1)-C(1)-H(1)   | 109.5      |
| H(16)-C(1)-H(1)  | 109.5      |
| H(3)-C(1)-H(1)   | 109.5      |
| O(2)-C(2)-O(1)   | 123.61(12) |
| O(2)-C(2)-C(3)   | 126.25(12) |
| O(1)-C(2)-C(3)   | 110.13(10) |
| C(2)-C(3)-C(4)   | 114.52(10) |
| C(2)-C(3)-H(14)  | 108.6      |
| C(4)-C(3)-H(14)  | 108.6      |
| C(2)-C(3)-H(15)  | 108.6      |
| C(4)-C(3)-H(15)  | 108.6      |
| H(14)-C(3)-H(15) | 107.6      |
| N(1)-C(4)-C(5)   | 99.95(9)   |
| N(1)-C(4)-C(3)   | 113.57(10) |
| C(5)-C(4)-C(3)   | 111.90(10) |

|                   |            |
|-------------------|------------|
| N(1)-C(4)-H(13)   | 110.3      |
| C(5)-C(4)-H(13)   | 110.3      |
| C(3)-C(4)-H(13)   | 110.3      |
| C(17)-C(5)-C(6)   | 119.76(12) |
| C(17)-C(5)-C(4)   | 128.95(12) |
| C(6)-C(5)-C(4)    | 111.29(11) |
| C(7)-C(6)-C(5)    | 121.77(12) |
| C(7)-C(6)-C(10)   | 131.13(12) |
| C(5)-C(6)-C(10)   | 107.10(11) |
| C(6)-C(7)-C(8)    | 118.97(12) |
| C(6)-C(7)-H(8)    | 120.5      |
| C(8)-C(7)-H(8)    | 120.5      |
| C(7)-C(8)-C(18)   | 118.90(12) |
| C(7)-C(8)-C(9)    | 120.31(12) |
| C(18)-C(8)-C(9)   | 120.78(12) |
| C(8)-C(9)-H(9)    | 109.5      |
| C(8)-C(9)-H(2)    | 109.5      |
| H(9)-C(9)-H(2)    | 109.5      |
| C(8)-C(9)-H(10)   | 109.5      |
| H(9)-C(9)-H(10)   | 109.5      |
| H(2)-C(9)-H(10)   | 109.5      |
| N(2)-C(10)-N(1)   | 114.98(11) |
| N(2)-C(10)-C(6)   | 136.56(12) |
| N(1)-C(10)-C(6)   | 108.46(11) |
| C(16)-C(11)-N(2)  | 128.47(12) |
| C(16)-C(11)-C(12) | 120.32(12) |
| N(2)-C(11)-C(12)  | 111.21(11) |
| N(1)-C(12)-C(13)  | 134.14(12) |
| N(1)-C(12)-C(11)  | 104.19(11) |
| C(13)-C(12)-C(11) | 121.66(12) |
| C(14)-C(13)-C(12) | 116.63(13) |
| C(14)-C(13)-H(7)  | 121.7      |
| C(12)-C(13)-H(7)  | 121.7      |

|                   |            |
|-------------------|------------|
| C(13)-C(14)-C(15) | 122.16(13) |
| C(13)-C(14)-H(6)  | 118.9      |
| C(15)-C(14)-H(6)  | 118.9      |
| C(16)-C(15)-C(14) | 121.19(13) |
| C(16)-C(15)-H(5)  | 119.4      |
| C(14)-C(15)-H(5)  | 119.4      |
| C(15)-C(16)-C(11) | 117.97(12) |
| C(15)-C(16)-H(4)  | 121.0      |
| C(11)-C(16)-H(4)  | 121.0      |
| C(5)-C(17)-C(18)  | 118.45(12) |
| C(5)-C(17)-H(12)  | 120.8      |
| C(18)-C(17)-H(12) | 120.8      |
| C(17)-C(18)-C(8)  | 122.14(12) |
| C(17)-C(18)-H(11) | 118.9      |
| C(8)-C(18)-H(11)  | 118.9      |

---

Symmetry transformations used to generate equivalent atoms:

Table 4. Anisotropic displacement parameters ( $\text{\AA}^2 \times 10^3$ ) for mo\_160318lt\_0m. The anisotropic displacement factor exponent takes the form:  $-2\pi^2 [ h^2 a^{*2} U^{11} + \dots + 2 h k a^* b^* U^{12} ]$

|      | U <sup>11</sup> | U <sup>22</sup> | U <sup>33</sup> | U <sup>23</sup> | U <sup>13</sup> | U <sup>12</sup> |
|------|-----------------|-----------------|-----------------|-----------------|-----------------|-----------------|
| O(1) | 16(1)           | 39(1)           | 28(1)           | -11(1)          | 3(1)            | 0(1)            |
| O(2) | 23(1)           | 35(1)           | 26(1)           | -1(1)           | 4(1)            | 11(1)           |
| N(1) | 18(1)           | 19(1)           | 16(1)           | 0(1)            | 3(1)            | 1(1)            |
| N(2) | 20(1)           | 19(1)           | 18(1)           | -1(1)           | 4(1)            | 0(1)            |
| C(1) | 17(1)           | 63(1)           | 40(1)           | -18(1)          | 0(1)            | -3(1)           |
| C(2) | 21(1)           | 26(1)           | 14(1)           | 2(1)            | 3(1)            | 4(1)            |
| C(3) | 19(1)           | 20(1)           | 16(1)           | 2(1)            | 3(1)            | 4(1)            |
| C(4) | 21(1)           | 18(1)           | 18(1)           | 3(1)            | 5(1)            | 3(1)            |
| C(5) | 21(1)           | 15(1)           | 19(1)           | -3(1)           | 5(1)            | 2(1)            |
| C(6) | 22(1)           | 14(1)           | 18(1)           | -3(1)           | 5(1)            | 1(1)            |

|       |       |       |       |       |       |       |
|-------|-------|-------|-------|-------|-------|-------|
| C(7)  | 23(1) | 18(1) | 18(1) | -3(1) | 2(1)  | 0(1)  |
| C(8)  | 22(1) | 20(1) | 24(1) | -9(1) | 6(1)  | -3(1) |
| C(9)  | 24(1) | 34(1) | 32(1) | -5(1) | 6(1)  | -7(1) |
| C(10) | 18(1) | 15(1) | 16(1) | -4(1) | 2(1)  | 1(1)  |
| C(11) | 21(1) | 18(1) | 17(1) | -5(1) | 4(1)  | 1(1)  |
| C(12) | 22(1) | 18(1) | 17(1) | -4(1) | 7(1)  | 0(1)  |
| C(13) | 21(1) | 31(1) | 22(1) | -4(1) | 4(1)  | 1(1)  |
| C(14) | 20(1) | 37(1) | 26(1) | -6(1) | 8(1)  | -3(1) |
| C(15) | 28(1) | 30(1) | 23(1) | -3(1) | 12(1) | -5(1) |
| C(16) | 28(1) | 22(1) | 18(1) | -2(1) | 6(1)  | -1(1) |
| C(17) | 28(1) | 19(1) | 18(1) | 0(1)  | 6(1)  | 0(1)  |
| C(18) | 27(1) | 21(1) | 22(1) | -4(1) | 10(1) | -4(1) |

Table 5. Hydrogen coordinates ( $\times 10^4$ ) and isotropic displacement parameters ( $\text{\AA}^2 \times 10^{-3}$ ) for mo\_160318lt\_0m.

|       | x    | y     | z    | U(eq) |
|-------|------|-------|------|-------|
| H(16) | 321  | -121  | 2675 | 61    |
| H(3)  | 619  | -837  | 1737 | 61    |
| H(1)  | 425  | 1111  | 1843 | 61    |
| H(14) | 3624 | 2345  | 2842 | 22    |
| H(15) | 3666 | 683   | 3439 | 22    |
| H(13) | 3322 | 3874  | 4216 | 23    |
| H(8)  | 6947 | 2075  | 6100 | 24    |
| H(9)  | 8590 | 4724  | 5574 | 45    |
| H(2)  | 8813 | 3507  | 4770 | 45    |
| H(10) | 8714 | 2771  | 5761 | 45    |
| H(7)  | 1317 | 1576  | 4803 | 29    |
| H(6)  | 466  | 147   | 5864 | 33    |
| H(5)  | 1480 | -1103 | 7172 | 31    |
| H(4)  | 3386 | -893  | 7501 | 27    |
| H(12) | 5229 | 4406  | 3267 | 26    |
| H(11) | 7119 | 4655  | 3766 | 27    |
